# Supplementary material
Source: publisher figshare collection journal article supplement (https://gsajournals.figshare.com/ndownloader/files/22365771)
Supplement: Supplementary file 1 [file 22365771]

## Sheet: Dubin_S1A
TABLE S1A: Each row reports the value for one gene of DXY, a metric of sequence divergence, between the S. cerevisiae population in the column header and the European S. paradoxus population. ‘NaN’ indicates an undefined DXY value.
gene	Africanbeer	Africanpalmwine	Alebeer	Alpechin	Asianfermentation	Asianislands	Brazilianbioethanol	Ecuadorean	FrenchGuianahuman	Frenchdairy	Mixedorigin	Mosaicbeer	Mosaicregion1	Mosaicregion2	Mosaicregion3	NorthAmericanoak	Sake	WestAfricancocoa	WineEuropean	WineEuropeansubclade1	WineEuropeansubclade2	WineEuropeansubclade3	WineEuropeansubclade4
YAL002W	0.104471	0.105061	0.103558	0.104052	0.105024	0.105074	0.104075	0.105098	0.105166	0.104126	0.103758	0.104549	0.103983	0.104575	0.104564	0.104575	0.105076	0.103027	0.104134	0.104125	0.104052	0.103791	0.103751
YAL007C	0.0736921	0.0748986	0.0718319	0.0721006	0.0723621	0.0736513	0.071877	0.0717489	0.0732436	0.0719824	0.0718942	0.0736707	0.0724464	0.0729945	0.0722622	0.0717489	0.07318	0.0720938	0.0724405	0.0724963	0.0732436	0.0717489	0.0732436
YAL008W	0.113449	0.114156	0.112578	0.113958	0.117543	0.113861	0.113767	0.112211	0.113968	0.113595	0.111913	0.115276	0.113421	0.115053	0.113961	0.112211	0.118636	0.114242	0.114533	0.114503	0.117162	0.113861	0.113904
YAL009W	0.0696445	0.069031	0.0691531	0.0711641	0.0697119	0.0692308	0.0681518	0.0682984	0.0670163	0.0689795	0.06796	0.0695804	0.0694095	0.0695804	0.0695027	0.0682984	0.0708625	0.0694818	0.0708386	0.07072	0.0708625	0.0708625	0.0709611
YAL010C	0.0984606	0.0980357	0.0983758	0.0993527	0.0995725	0.099865	0.0978863	0.0999877	0.0993565	0.0966139	0.0964904	0.0993451	0.0982783	0.0995908	0.0983519	0.0986382	0.101998	0.0976001	0.0993759	0.0993505	0.099313	0.099313	0.100195
YAL012W	0.051308	0.0518867	0.0508955	0.0520675	0.0515266	0.0533717	0.0508379	0.0529114	0.0529386	0.0516719	0.0504735	0.0518264	0.0516737	0.0512236	0.051164	0.0520675	0.0512416	0.0523272	0.0520801	0.05188	0.0520675	0.0520675	0.0520891
YAL013W	0.0791872	0.0784424	0.0775497	0.0809814	0.079104	0.0801164	0.0784893	0.0775041	0.0803379	0.0794027	0.0773103	0.079498	0.0789819	0.0800128	0.0788362	0.0783251	0.0807358	0.0804724	0.080295	0.0802408	0.0807882	0.0791461	0.0817566
YAL016W	0.0698292	NaN	0.0686059	0.0697367	0.0704966	0.0697231	0.0700539	0.0691696	0.0692678	0.0698831	0.0681972	0.0698703	0.0698461	0.069677	0.0693863	0.0722138	0.071782	0.069638	0.0699666	0.0697052	0.0701843	0.0701843	0.069703
YAL017W	0.0951164	0.0959611	0.0921915	0.0947578	0.0952539	0.095459	0.095	0.0946569	0.093882	0.0951471	0.0932101	0.0944468	0.0945098	0.0948339	0.0940255	0.0948831	0.094928	0.0944495	0.0948224	0.0945207	0.0951282	0.0946569	0.0947386
YAL019W	0.0857781	0.0870521	0.0839715	0.0865478	0.0865897	0.0866885	0.0858721	0.0889214	0.0866294	0.0861253	0.0838897	0.0860949	0.0860949	0.0855263	0.0855514	0.0874594	0.0863893	0.08557	0.0866433	0.0864102	0.0867396	0.0865822	0.0868671
YAL024C	0.107164	0.107045	0.105369	0.107662	0.108222	0.108339	0.105664	0.108192	0.108975	0.107044	0.10593	0.107444	0.107515	0.107512	0.107175	0.107268	0.107902	0.106362	0.10769	0.107666	0.107961	0.10773	0.107772
YAL025C	0.0706625	0.0713084	0.0710831	0.0716088	0.0696136	0.069697	0.0708277	0.0716088	0.0737458	0.0729758	0.070864	0.0703069	0.0709078	0.0709078	0.0704723	0.0716088	0.0697743	0.073631	0.0715891	0.0716673	0.0716088	0.0716088	0.0716088
YAL026C	0.0793142	0.0792466	0.0780892	0.0786266	0.0799958	0.0798136	0.0789612	0.0797689	0.0800782	0.0792937	0.0776897	0.0790549	0.0788676	0.0788539	0.0789738	0.0805064	0.0805273	0.08079	0.0786031	0.078813	0.07871	0.0785398	0.0782184
YAL027W	0.118003	0.119684	0.110899	0.119593	0.12018	0.120171	0.119557	0.115776	0.118567	0.119076	0.113673	0.117775	0.119423	0.119275	0.116174	0.119984	0.122137	0.113525	0.119707	0.119734	0.119593	0.119593	0.119625
YAL028W	0.12373	0.127268	0.122215	0.124459	0.125557	0.1256	0.123429	0.125031	0.126008	0.123246	0.121957	0.123641	0.124102	0.12404	0.123626	0.125589	0.126235	0.12168	0.123741	0.123833	0.124159	0.12373	0.123921
YAL031C	0.114658	0.115603	0.112972	0.114138	0.114478	0.114244	0.114652	0.115916	0.114461	0.115314	0.114718	0.11479	0.114631	0.114724	0.114155	0.114602	0.114266	0.114636	0.114774	0.11487	0.114703	0.11504	0.11458
YAL032C	0.0994662	0.104092	0.0983148	0.098501	0.104271	0.10292	0.0989974	0.103784	0.0997169	0.0973612	0.0986866	0.100864	0.0992359	0.0992743	0.100565	0.102057	0.103784	0.0998647	0.0993437	0.0996101	0.0994662	0.0994662	0.098669
YAL033W	0.0727358	0.0705956	0.0723717	0.0737547	0.0714753	0.0720123	0.0726689	0.0694586	0.0735664	0.0741403	0.0725017	0.0739173	0.073204	0.0729959	0.0722014	0.0694586	0.0712914	0.0697467	0.0732668	0.073204	0.073204	0.073204	0.073204
YAL035W	0.0794893	0.0796658	0.0772369	0.0743066	0.0781234	0.0789512	0.0797528	0.0807886	0.0805713	0.0802081	0.078602	0.0805442	0.0803823	0.0803074	0.0791671	0.0785429	0.0778466	0.0790611	0.0804546	0.0800579	0.0804678	0.0804678	0.0804678
YAL036C	0.0786486	0.0800837	0.0751251	0.0725225	0.082444	0.080344	0.0787645	0.0774775	0.0792793	0.0790541	0.0765766	0.0788503	0.0785586	0.0791291	0.0786514	0.0810811	0.0810619	0.0783091	0.0785969	0.0788789	0.0783784	0.0783784	0.0788173
YAL038W	0.0199182	0.0193315	0.0193922	0.00870985	0.0200376	0.0191133	0.0191651	0.0193552	0.019484	0.019376	0.0194199	0.0196404	0.0194439	0.0194292	0.0195367	0.0200206	0.0202895	0.0194576	0.0193701	0.0193552	0.0193552	0.0193552	0.0189799
YAL039C	0.0706981	0.0690562	0.0688502	0.039413	0.0696354	0.0681428	0.0679012	0.0726114	0.0705115	0.0682636	0.0681025	0.0698194	0.0695921	0.070518	0.0690307	0.0703167	0.0699569	0.0684586	0.0695358	0.0693773	0.0715244	0.069109	0.0691709
YAL040C	0.0589041	0.0580643	0.0573123	0.0429929	0.0580318	0.0580012	0.0588389	0.0575342	0.0593939	0.0571811	0.0577404	0.0585902	0.0581431	0.0586124	0.0577245	0.0575342	0.058105	0.0570513	0.0589931	0.0592466	0.0595978	0.0592466	0.059993
YAL041W	0.0926068	0.0907243	0.0916494	0.0917514	0.0923559	0.0912925	0.0917212	0.090661	0.0935512	0.0914396	0.0907777	0.0920331	0.0917101	0.091931	0.0914758	0.090661	0.0917914	0.0902166	0.0920965	0.0921909	0.0924958	0.0922559	0.0921259
YAL042W	0.0987179	0.0992445	0.0980235	0.0995475	0.100736	0.102054	0.0985348	0.103365	0.101866	0.0996344	0.098847	0.100008	0.0996795	0.0993145	0.0998122	0.0985577	0.100604	0.0983111	0.0996669	0.099537	0.0996055	0.099359	0.0994206
YAL043C	0.0979008	0.0965073	0.0970172	0.0981315	0.0992682	0.0976984	0.0978856	0.0954623	0.098896	0.0994911	0.0973176	0.0976837	0.0978089	0.0972529	0.0976941	0.0971586	0.0992159	0.0960495	0.09826	0.0983838	0.0981373	0.0980068	0.0980285
YAL044C	0.0665603	0.0678274	0.0659322	0.0653907	0.0673901	0.0659224	0.067897	0.0718235	0.0735024	0.065208	0.0661217	0.0656692	0.0664304	0.0669069	0.0668872	0.0673401	0.0673401	0.0689895	0.0655217	0.0653907	0.0653907	0.0653907	0.0653907
YAL047C	0.120117	0.119476	0.115767	0.119415	0.117675	0.118602	0.117023	0.120197	0.12114	0.118951	0.117303	0.119134	0.119417	0.119045	0.118232	0.119134	0.11815	0.117866	0.119269	0.119223	0.119666	0.119666	0.119243
YAL048C	0.086809	0.0882209	0.084526	0.0862331	0.0860579	0.086951	0.0837282	0.0866767	0.0876206	0.085357	0.084952	0.0855994	0.0861069	0.0860399	0.0853716	0.086174	0.0861954	0.086522	0.0862584	0.086174	0.086174	0.086174	0.0867412
YAL049C	0.105361	0.104908	0.104132	0.106981	0.104282	0.104527	0.101351	0.102932	0.104761	0.104914	0.105144	0.106595	0.105631	0.105706	0.105195	0.104282	0.105373	0.104282	0.107016	0.106006	0.106981	0.106981	0.106046
YAL051W	0.102507	0.100124	0.0993392	0.102106	0.102782	0.102577	0.099298	0.0998065	0.100503	0.100154	0.100398	0.101365	0.10076	0.10113	0.100916	0.101078	0.103754	0.099342	0.101707	0.10136	0.101469	0.101078	0.102349
YAL053W	0.0832696	0.082729	0.0814909	0.0832033	0.0829365	0.0820346	0.0813168	0.0839286	0.0824473	0.083623	0.0816019	0.0826126	0.082398	0.0830782	0.082215	0.0813776	0.0839738	0.0819335	0.082772	0.0826531	0.0827185	0.0826531	0.0831654
YAL054C	0.0791041	0.0792908	0.0778254	0.0799018	0.0793836	0.0798319	0.0795142	0.0775401	0.0795732	0.0809977	0.0774947	0.0799855	0.0790963	0.0795372	0.078752	0.0798744	0.0790797	0.0788688	0.0800346	0.0799262	0.0798385	0.0798744	0.0799701
YAL055W	0.146317	0.157656	0.140925	0.145705	0.155664	0.157375	0.145909	0.154696	0.160102	0.148999	0.141884	0.145839	0.146961	0.148875	0.149718	0.15488	0.156792	0.148321	0.14568	0.145488	0.14563	0.14733	0.145394
YAL058W	0.136306	0.135871	0.134727	0.136273	0.134616	0.13474	0.134234	0.135611	0.135953	0.136923	0.135841	0.136021	0.13543	0.136501	0.134366	0.134285	0.135518	0.133877	0.136479	0.1362	0.136375	0.137599	0.136613
YAL060W	0.0795945	0.0823863	0.0789953	0.0753692	0.0833167	0.0805553	0.0796746	0.0801553	0.0851374	0.081401	0.0785591	0.0800772	0.0782629	0.0794267	0.0803505	0.0793788	0.082316	0.0791797	0.0801579	0.0801457	0.0801752	0.0802416	0.078516
YAL061W	0.0942584	0.0936318	0.0922648	0.089849	0.0937881	0.0931709	0.0939166	0.091866	0.0932757	NaN	0.0928527	0.0939234	0.0932483	0.0942584	0.093336	0.0926635	0.093919	0.0917433	0.0951783	0.0954545	0.0951172	0.0950558	0.0936041
YAR002W	0.12986	0.13299	0.129299	0.131527	0.131333	0.131016	0.129593	0.131852	0.13197	0.13189	0.128907	0.130422	0.129523	0.130898	0.130546	0.131852	0.132829	0.128081	0.130772	0.130796	0.130626	0.130626	0.131239
YAR003W	0.0777127	0.0781198	0.0776737	0.0782477	0.0776837	0.0790576	0.0780863	0.0796253	0.0785425	0.078064	0.0775219	0.0782127	0.0775436	0.0781941	0.0777407	0.0788447	0.0776986	0.079265	0.0783262	0.0783676	0.078064	0.078064	0.0788447
YAR007C	0.076313	0.0787169	0.0757168	0.0762468	0.0798898	0.0765419	0.0764891	0.0761522	0.0781402	0.075633	0.0754972	0.0769943	0.0757592	0.0773729	0.0768505	0.0766881	0.0780222	0.0749155	0.0763842	0.0760629	0.0766881	0.0756163	0.0762759
YAR015W	0.0573586	0.0518211	0.0523037	0.0573139	0.052712	0.0529069	0.0569088	0.0539927	0.0521714	0.0524658	0.0534046	0.0561642	0.056309	0.055561	0.0539379	0.0529069	0.0530917	0.0535751	0.0572338	0.0570691	0.057083	0.05725	0.057779
YAR018C	0.0675737	0.0693212	0.067425	0.0686193	0.0689214	0.0688073	0.067175	0.0670003	0.0680114	0.0676931	0.0677117	0.0685293	0.0676119	0.0686568	0.0683131	0.0685293	0.0686269	0.0679412	0.0675908	0.0679772	0.0681765	0.0677648	0.0682941
YAR019C	0.0992365	0.100791	0.0984514	0.0992604	0.0989762	0.0995245	0.0991414	0.0996426	0.100533	0.0995817	0.0989703	0.0996581	0.0988412	0.0992636	0.0991143	0.0993177	0.100963	0.0987929	0.0991129	0.0991372	0.0989929	0.0993177	0.099626
YBL001C	0.0761905	0.0768707	0.0761905	0.0761905	0.0761905	0.0759019	0.0761905	0.0761905	0.0728111	0.0757937	0.0761905	0.0764928	0.0764021	0.0763668	0.0762225	0.0761905	0.0761905	0.0759463	0.0761905	0.0763668	0.0761905	0.0761905	0.0761905
YBL003C	0.0443609	0.046903	0.045252	0.0451128	0.0476833	0.0471634	0.0451128	0.0451128	0.047619	0.0451911	0.0453599	0.0460675	0.0452799	0.0455305	0.0463786	0.047619	0.047619	0.0470407	0.0451128	0.0451128	0.0451128	0.0451128	0.0451128
YBL005W	0.11095	0.109802	0.11072	0.110419	0.112049	0.11077	0.110626	0.112103	0.110574	0.111774	0.110271	0.110804	0.110876	0.110948	0.110975	0.110451	0.111464	0.110975	0.110817	0.11108	0.110739	0.111421	0.111089
YBL006C	0.121639	0.12352	0.118273	0.12198	0.123625	0.123556	0.121705	0.123389	0.12125	0.122468	0.121342	0.121284	0.12167	0.121972	0.121863	0.121547	0.123271	0.121972	0.121767	0.121649	0.121547	0.123389	0.121594
YBL008W	0.101317	0.102551	0.0998571	0.102367	0.102503	0.102295	0.101541	0.103556	0.10316	0.103024	0.101343	0.101832	0.101812	0.101685	0.101829	0.102367	0.102738	0.102794	0.101677	0.101751	0.101575	0.101575	0.102316
YBL009W	0.120745	0.122351	0.118968	0.122179	0.122049	0.122133	0.12152	0.123229	0.12228	0.121013	0.120567	0.121116	0.122104	0.121353	0.12072	0.123229	0.122562	0.121819	0.121822	0.121434	0.122042	0.121782	0.121287
YBL010C	0.110056	0.109488	0.107492	0.111183	0.109297	0.109134	0.1082	0.108811	0.111527	0.109181	0.107542	0.109545	0.109364	0.109404	0.108799	0.108811	0.108811	0.109358	0.10978	0.109799	0.109997	0.109997	0.109997
YBL014C	0.119371	0.121003	0.118008	0.120606	0.12051	0.120435	0.120767	0.121043	0.121596	0.11994	0.11951	0.120495	0.12082	0.1203	0.119598	0.119928	0.120229	0.119614	0.120336	0.120321	0.1203	0.1203	0.120529
YBL015W	0.0746996	0.07493	0.0733361	0.074934	0.0751553	0.0756138	0.0741122	0.0752688	0.0767175	0.0739247	0.0741092	0.0743953	0.0747206	0.0747417	0.0743588	0.0759013	0.0745825	0.0737119	0.0746478	0.0747066	0.0746363	0.0746363	0.0752202
YBL016W	0.100779	0.0981761	0.0998872	0.100718	0.101124	0.0998973	0.0993127	0.0995549	0.100496	0.102527	0.0992541	0.100676	0.100308	0.0997641	0.100107	0.101438	0.100917	0.100062	0.100584	0.100549	0.100786	0.100496	0.101462
YBL020W	0.0970171	0.0982552	0.096431	0.099428	0.100033	0.0978129	0.0971414	0.0999736	0.100067	0.098141	0.0971798	0.0984554	0.0980799	0.0972683	0.0977602	0.0988142	0.0994063	0.0963616	0.098161	0.0982023	0.0981899	0.0982345	0.0976994
YBL021C	0.0730512	0.0754814	0.0733194	0.0734772	0.0765908	0.0735632	0.0730019	0.0752351	0.0729363	0.0709248	0.0733833	0.0735931	0.0732428	0.0735748	0.0742134	0.0729363	0.0776318	0.0748814	0.0729277	0.0729363	0.0729363	0.0729363	0.0729363
YBL022C	0.0933848	0.0949735	0.0913629	0.093139	0.0930433	0.0926674	0.0924414	0.0965315	0.0930648	0.0929095	0.0914115	0.0927438	0.0929375	0.0923999	0.0929142	0.0945326	0.0937696	0.0917198	0.092902	0.0929094	0.0929408	0.0928277	0.0933177
YBL023C	0.0835911	0.0849978	0.0817563	0.0841478	0.0828399	0.0829676	0.0837279	0.0832463	0.0847912	0.0837036	0.0822937	0.0836659	0.0837571	0.0831185	0.0835017	0.08248	0.0824474	0.0834231	0.0839997	0.0840977	0.0841894	0.0840125	0.0846806
YBL024W	0.0815859	0.0812905	0.0795178	0.0815072	0.0811336	0.081221	0.0815268	0.0807344	0.0821	0.0816468	0.0802815	0.0811515	0.08174	0.0817346	0.0812603	0.0807344	0.081252	0.0805472	0.0819091	0.0820861	0.0814456	0.081221	0.0822192
YBL025W	0.0889269	0.0875734	0.0870117	0.089444	0.0871678	0.0913242	0.0877365	0.0936073	0.0920607	0.0909675	0.086536	0.0895847	0.0888889	0.087519	0.088257	0.0913242	0.0869037	0.089568	0.0891007	0.0890411	0.0890411	0.0890411	0.0890996
YBL030C	0.0493208	0.0486416	0.0464646	0.0496097	0.0473622	0.0483804	0.0482311	0.0483804	0.05165	0.0466497	0.0461889	0.049475	0.0495646	0.0486706	0.0478252	0.0483804	0.0483804	0.0483	0.0499478	0.0500058	0.0494253	0.0494253	0.0514884
YBL031W	0.0927953	0.0946418	0.093103	0.0929411	0.0952336	0.0951497	0.0928578	0.0939129	0.0958565	0.09285	0.0929951	0.0940054	0.0933946	0.0936842	0.0947669	0.0948847	0.0958565	0.0945109	0.0929955	0.0929411	0.0933148	0.0929411	0.092966
YBL033C	0.104129	0.105175	0.101983	0.102733	0.105153	0.104309	0.102265	0.104659	0.103696	0.102913	0.102411	0.10287	0.102989	0.103107	0.103978	0.105623	0.10468	0.10251	0.102955	0.10284	0.102733	0.101769	0.102683
YBL045C	0.0950958	0.0943006	0.0958236	0.0948128	0.0943462	0.0948789	0.0958109	0.0948855	0.0957284	0.095768	0.0947824	0.09509	0.0955406	0.0954597	0.094881	0.094085	0.0944566	0.0945888	0.0954428	0.0962684	0.0948128	0.0948128	0.0966416
YBL049W	0.0597122	0.0589243	0.058753	0.0603752	0.0581074	0.05799	0.0597465	0.059952	0.0601068	0.0592026	0.0589861	0.0600662	0.059952	0.0603517	0.0592738	0.059952	0.0587275	0.0595831	0.0600057	0.0600853	0.059952	0.059952	0.0623501
YBL051C	0.0927755	0.0942861	0.0929928	0.0930333	0.0939733	0.0930254	0.0922483	0.0937908	0.0928641	0.0921501	0.0915345	0.0929181	0.0928002	0.0923875	0.0926551	0.0942861	0.0940859	0.0915429	0.0929259	0.0930479	0.0928002	0.0942861	0.0914667
YBL052C	0.133733	0.135148	0.133967	0.135946	0.13378	0.134518	0.132831	0.136222	0.135353	0.134538	0.133496	0.134976	0.134634	0.133815	0.133633	0.135051	0.134204	0.133279	0.134949	0.13466	0.134961	0.13466	0.134897
YBL054W	0.113998	0.11306	0.113395	0.116411	0.113242	0.113594	0.114191	0.113874	0.116478	0.115761	0.113618	0.114901	0.116175	0.115415	0.113962	0.113258	0.115474	0.113258	0.116353	0.116031	0.116339	0.116339	0.114696
YBL056W	0.0674032	0.0675357	0.0672288	0.066957	0.0670374	0.0676488	0.0670562	0.0675842	0.0689139	0.0693388	0.0668932	0.067178	0.0673472	0.0675375	0.0675017	0.0675842	0.067569	0.0672561	0.0671864	0.0671498	0.0675842	0.0675842	0.0668916
YBL058W	0.123568	0.124545	0.121353	0.123913	0.128048	0.125803	0.12162	0.126015	0.123735	0.123102	0.120986	0.124276	0.124254	0.123469	0.124108	0.126792	0.126991	0.125179	0.123826	0.122951	0.124402	0.123684	0.1236
YBL060W	0.121826	0.12313	0.11957	0.123065	0.123709	0.12315	0.121042	0.12152	0.122759	0.122034	0.12027	0.122712	0.122278	0.122252	0.122316	0.12315	0.122047	0.122869	0.122678	0.122612	0.122852	0.12315	0.12284
YBL064C	0.0956107	0.0954653	0.0966921	0.0968418	0.0937887	0.09195	0.096474	0.0941476	0.0972667	0.0974078	0.0951885	0.0981461	0.0974555	0.0977523	0.0958307	0.0941476	0.0928753	0.0957134	0.0979739	0.0982471	0.0973772	0.0979644	0.0980296
YBL066C	0.111116	0.111462	0.110663	0.111088	0.112594	0.112935	0.110257	0.110696	0.11265	0.111058	0.11003	0.111262	0.111256	0.111227	0.11105	0.110696	0.11286	0.111543	0.111138	0.11134	0.110986	0.110986	0.111417
YBL067C	0.101614	0.101869	0.0992996	0.101662	0.100183	0.101199	0.10044	0.100389	0.102315	0.101169	0.0988292	0.100495	0.101458	0.101478	0.100781	0.101726	0.100038	0.101314	0.101716	0.101206	0.101931	0.102617	0.101292
YBL068W	0.0660769	0.0669894	0.0665538	0.0663646	0.0684133	0.0671385	0.0662338	0.0667755	0.0659707	0.0668691	0.0665399	0.0671557	0.0670417	0.0669419	0.0669872	0.0677735	0.0698757	0.0665452	0.0668314	0.066831	0.0667755	0.0667755	0.0669291
YBL069W	0.0931395	0.0914175	0.0909561	0.0916097	0.0938382	0.093587	0.0916279	0.0922481	0.0907477	0.0916909	0.091699	0.0914729	0.0916796	0.0919466	0.0920758	0.0922481	0.0941778	0.0927251	0.0915481	0.0914729	0.0914729	0.0914406	0.0922083
YBL075C	0.0945553	0.0960157	0.0919477	0.0958508	0.096127	0.095711	0.0945907	0.095338	0.0934852	0.0961874	0.0923261	0.0954113	0.0955431	0.0958508	0.0949646	0.095338	0.0954907	0.0939179	0.095935	0.0959648	0.0958508	0.0958508	0.0962979
YBL076C	0.0656542	0.0652487	0.0636404	0.0662244	0.0653571	0.0663673	0.0653603	0.0655483	0.0659592	0.0658784	0.0643186	0.0661696	0.0654843	0.0655954	0.0652673	0.0664803	0.0654095	0.0653093	0.065903	0.0659453	0.0661218	0.065859	0.0655802
YBL079W	0.0973476	0.0965197	0.0957182	0.0974669	0.0967792	0.0977403	0.0973539	0.0963781	0.0971244	0.0966535	0.0954813	0.0962836	0.0970391	0.0968555	0.0965161	0.0968188	0.0971876	0.0961407	0.0974254	0.0975288	0.0974799	0.0972595	0.0975194
YBL080C	0.103321	0.10391	0.101093	0.104992	0.103469	0.103634	0.104393	0.10369	0.103869	0.103805	0.101016	0.104041	0.104387	0.103485	0.102684	0.101845	0.103455	0.102507	0.104929	0.104613	0.105535	0.10492	0.105188
YBL085W	0.101605	0.102877	0.100854	0.101922	0.102717	0.103256	0.102398	0.103164	0.102245	0.101865	0.101124	0.10259	0.102471	0.102289	0.102104	0.102158	0.102515	0.102081	0.102419	0.102587	0.102674	0.102494	0.102872
YBL086C	0.101051	0.0984918	0.0967527	0.0996474	0.0995559	0.100188	0.0994095	0.097982	0.100952	0.0988742	0.0977639	0.0998854	0.0994571	0.100165	0.0991139	0.097982	0.100214	0.0988055	0.0996306	0.100004	0.100563	0.0994095	0.0994095
YBL089W	0.111393	0.112853	0.109739	0.111664	0.110714	0.112385	0.111212	0.111792	0.111955	0.111339	0.109447	0.111447	0.111454	0.11151	0.111221	0.111792	0.11338	0.112015	0.111294	0.111188	0.111792	0.111792	0.111272
YBL090W	0.107984	0.107824	0.106798	0.107312	0.114817	0.113041	0.107102	0.107423	0.107423	0.109412	0.108203	0.107512	0.108172	0.107735	0.109787	0.114913	0.114674	0.110304	0.107457	0.107423	0.107423	0.107423	0.107423
YBL091C	0.085843	0.0831461	0.0852243	0.0861148	0.0851534	0.0844464	0.0851378	0.0850926	0.0872075	0.0838584	0.0850597	0.0857697	0.0860405	0.0858825	0.0849331	0.082723	0.0858489	0.0849711	0.0858943	0.0858825	0.0858825	0.0858825	0.0859028
YBL093C	0.0693572	0.069827	0.0702541	0.0705179	0.068721	0.0695747	0.0695281	0.0687593	0.0686629	0.0691797	0.0691953	0.0695423	0.0700548	0.070005	0.0692727	0.0687593	0.0687593	0.0687593	0.0702262	0.0697559	0.0702541	0.0702541	0.0702541
YBL097W	0.119773	0.118674	0.116817	0.11848	0.118758	0.118254	0.11667	0.118893	0.120738	0.120508	0.116151	0.118412	0.118718	0.118845	0.118427	0.120213	0.118491	0.117134	0.118424	0.118356	0.118454	0.118014	0.118521
YBL099W	0.0565768	0.0560927	0.0557221	0.0570508	0.0554716	0.0563881	0.0558093	0.0563326	0.0577505	0.0553214	0.055756	0.0557221	0.0560477	0.0558577	0.0556912	0.0545011	0.055839	0.0556281	0.0563895	0.0564682	0.0563326	0.0563326	0.0577884
YBL103C	0.0825773	0.0826258	0.0816189	0.0820981	0.0839525	0.0831945	0.0814717	0.0805406	0.0832124	0.0825561	0.0811158	0.0819954	0.0819437	0.0823133	0.0818436	0.0818984	0.0819417	0.0804362	0.0819693	0.0818607	0.0818984	0.0818984	0.0829603
YBL104C	0.0928603	0.0937663	0.0929507	0.0936678	0.094136	0.093123	0.092514	0.0932715	0.094503	0.0932515	0.0926744	0.0934396	0.0931432	0.0934854	0.0934047	0.0935923	0.0933329	0.0932221	0.0931578	0.0929863	0.0934689	0.0932715	0.0932221
YBL106C	0.113317	0.113146	NaN	0.113117	0.1133	0.113337	0.111686	0.11705	0.112743	0.113007	0.111168	0.112483	0.112815	0.113097	0.113141	0.115403	0.114814	0.112844	0.112902	0.112933	0.113097	0.112768	0.112881
YBL107C	0.117651	0.118872	0.115649	0.117358	0.116452	0.115982	0.116769	0.118751	0.11695	0.11505	0.116855	0.116898	0.117961	0.117905	0.116368	0.115367	0.116843	0.115107	0.118151	0.118563	0.11836	0.118751	0.117059
YBR002C	0.0645286	0.0646862	0.0669998	0.0682827	0.066305	0.0664133	0.0647691	0.0660965	0.066134	0.0674757	0.0676064	0.0671473	0.0670257	0.0671289	0.0661786	0.0660965	0.0674803	0.0657391	0.0675223	0.0680322	0.0672579	0.0672579	0.0672877
YBR003W	0.0950742	0.0966765	0.0952031	0.0981332	0.0974841	0.0961514	0.097209	0.0953203	0.0967721	0.0958917	0.0963249	0.0973295	0.0971018	0.0970784	0.096265	0.0939138	0.097819	0.0941843	0.0973276	0.0973519	0.09743	0.09743	0.0974661
YBR004C	0.0989312	0.0994527	0.0988506	0.0974532	0.102226	0.100522	0.0988725	0.0996169	0.101644	0.098825	0.09896	0.0990695	0.0991571	0.0994891	0.0997185	0.101208	0.102258	0.100914	0.0988968	0.0988506	0.0988506	0.0988506	0.0990784
YBR005W	0.118686	0.124307	0.121377	0.121637	0.124672	0.123195	0.121592	0.124752	0.122793	0.121737	0.121659	0.122008	0.122572	0.12207	0.122153	0.12631	0.124918	0.123554	0.121578	0.121464	0.121637	0.121637	0.121637
YBR006W	0.079512	0.0806451	0.0776676	0.0803821	0.0824931	0.0809906	0.0801526	NaN	0.0810515	0.0802357	0.0796942	0.0802546	0.0806212	0.079564	0.0801451	0.0810515	0.0823902	0.0810515	0.0803696	0.0804565	0.0803821	0.0803821	0.0804336
YBR011C	0.0391204	0.0394345	0.0371013	0.0381944	0.0388177	0.0381944	0.0379299	0.0381944	0.0389785	0.0375796	0.0382105	0.0381944	0.0381944	0.0380658	0.038323	0.0381944	0.0382437	0.0380164	0.0382506	0.0381944	0.0381944	0.0381944	0.0381944
YBR014C	0.0260795	0.0295522	0.0261969	0.0259312	0.0302133	0.0295311	0.0262791	0.0290876	0.0307136	0.0260897	0.026084	0.0261453	0.0272448	0.0271906	0.0274616	0.0307136	0.0311634	0.0295879	0.0260055	0.0260163	0.0258356	0.0258356	0.0258356
YBR015C	0.11054	0.115931	0.1088	0.110875	0.11399	0.114979	0.110699	0.111989	0.113626	0.111014	0.109551	0.11114	0.111283	0.111339	0.111139	0.116449	0.115405	0.113404	0.110875	0.110906	0.111175	0.110875	0.110589
YBR017C	0.0823047	0.0825834	0.0819055	0.0829195	0.0822243	0.0826208	0.0823054	0.0827224	0.0839883	0.0863645	0.082331	0.0825662	0.0825662	0.0821858	0.082314	0.0826863	0.083016	0.0822151	0.0825424	0.0828064	0.0826863	0.0819656	0.0823537
YBR018C	0.117316	0.119059	0.116515	0.117827	0.118479	0.119808	0.117879	0.118735	0.119643	0.117827	0.116553	0.117481	0.118069	0.117625	0.117827	0.118735	0.119643	0.117408	0.118084	0.117877	0.117827	0.117827	0.11785
YBR019C	0.10867	0.110118	0.107296	0.109504	0.108572	0.10878	0.108368	0.108219	0.108602	0.108694	0.108113	0.108784	0.108789	0.109063	0.108435	0.109169	0.108694	0.108255	0.108849	0.108958	0.108657	0.108239	0.108803
YBR020W	0.0920286	0.0942822	0.0904046	0.0923827	0.0912233	0.0917296	0.091453	0.0916749	0.0928006	0.0922766	0.0912052	0.0918702	0.0923969	0.0920133	0.0914715	0.0922766	0.0910988	0.0926468	0.0921667	0.0921428	0.0922766	0.0916749	0.092076
YBR021W	0.0783438	0.0803292	0.0780434	0.0783699	0.0802398	0.0795098	0.0786535	0.0799373	0.0789429	0.0818008	0.0783481	0.0783948	0.0786486	0.0786602	0.0788713	0.0788924	0.0804042	0.0791335	0.0784693	0.0783699	0.0783699	0.0783699	0.0787852
YBR022W	0.130601	0.134266	0.131464	0.133129	0.137959	0.135342	0.13345	0.135002	0.131256	0.130445	0.132791	0.133486	0.133379	0.133545	0.134075	0.135002	0.13293	0.137162	0.133185	0.133129	0.133129	0.133129	0.133129
YBR023C	0.0774114	0.0789451	0.0764229	0.0792883	0.077399	0.0774814	0.0772525	0.077611	0.0797082	0.0777001	0.0767318	0.0787109	0.0788656	0.0782922	0.0776312	0.077611	0.0774836	0.0764704	0.0790953	0.0791951	0.0791464	0.0778962	0.079066
YBR024W	0.0799217	0.0807495	0.0804736	0.0826811	0.0804736	0.081176	0.0802844	NaN	0.0796191	0.0829915	0.0797224	0.0826811	0.082166	0.0819397	0.0809196	0.0793699	0.0799335	0.0803038	0.0826564	0.0827424	0.0826811	0.0826811	0.0827118
YBR025C	0.0565401	0.0564376	0.0556775	0.0569074	0.0561463	0.056402	0.0560338	0.0575527	0.0583966	0.0573945	0.0553962	0.0566285	0.0568214	0.056662	0.0563253	0.0575527	0.0562959	0.0572931	0.0567466	0.0571777	0.0571633	0.0567089	0.0567089
YBR026C	0.0898592	0.091784	0.0867365	0.0897254	0.0883966	0.0900342	0.0877845	0.0900342	0.0876071	0.0894601	0.0868263	0.0902425	0.089101	0.0890621	0.0886909	0.0900342	0.087968	0.0895631	0.0892246	0.0892565	0.0891593	0.0883573	0.0891593
YBR028C	0.105963	0.105275	0.104681	0.105176	0.105529	0.106464	0.104686	0.10704	0.106692	0.106169	0.104813	0.104988	0.105266	0.105033	0.105549	0.105773	0.106501	0.105188	0.10512	0.105139	0.104798	0.105139	0.105968
YBR029C	0.0684432	0.066946	0.0672261	0.0685652	0.0662215	0.06623	0.0671071	0.0655683	0.0684091	0.0682976	0.0664276	0.0683409	0.0681884	0.0674283	0.0672077	0.0662961	0.0656922	0.0676398	0.0682942	0.0684391	0.0684796	0.0677518	0.0686848
YBR033W	0.155611	0.160078	0.153652	NaN	0.159131	0.158465	0.155997	0.157839	0.158073	0.153593	0.15549	0.15639	0.156557	NaN	0.156413	0.159289	0.159435	0.156808	0.155207	0.155363	0.155303	0.15639	0.156446
YBR034C	0.0782061	0.0812215	0.0784927	0.0784927	0.0787376	0.0790136	0.0789566	0.0784927	0.0785235	0.0787314	0.0784927	0.0785381	0.0786837	0.0785988	0.078647	0.0784927	0.0790007	0.0776845	0.0786138	0.0785988	0.0784927	0.0784927	0.0785661
YBR035C	0.0770015	0.0751196	0.0764192	0.0774039	0.0789385	0.0762207	0.0770223	0.0756914	0.0746584	0.077147	0.0775109	0.0758994	0.0769529	0.0773896	0.0771323	0.0756914	0.0779522	0.0758034	0.0772393	0.077147	0.077147	0.077147	0.077147
YBR036C	0.0815644	0.0835697	0.0817847	0.0826281	0.0828807	0.0824507	0.0813622	0.0812004	0.0860286	0.0821864	0.0803126	0.0824717	0.0826027	0.0820094	0.0821729	0.0812004	0.0834382	0.0820716	0.0827068	0.0833578	0.0820094	0.0828185	0.0819679
YBR039W	0.0676816	0.0692155	0.066358	0.044369	0.0693349	0.0684732	0.0673687	0.0673077	0.0674455	0.068109	0.0668774	0.0685796	0.0673789	0.0679606	0.0678365	0.0673077	0.0695808	0.0671433	0.0674113	0.0673077	0.0678008	0.0673077	0.0694444
YBR041W	0.0792854	0.0788412	0.0774335	0.0670471	0.0788926	0.0786974	0.0786599	0.0792854	0.0803928	0.0788501	0.0771571	0.0788353	0.0773617	0.0790919	0.0785919	0.0787879	0.0788726	0.0785965	0.0797551	0.0801699	0.0798212	0.0802804	0.0793237
YBR042C	0.103764	0.103524	0.104355	0.0975958	0.106859	0.103776	0.105552	0.103853	0.107338	0.10401	0.102015	0.103853	0.105918	0.106179	0.104259	0.106365	0.108058	0.103788	0.106353	0.107063	0.107203	0.105563	0.106365
YBR043C	0.100709	0.100032	0.098986	0.0986545	0.0996818	0.0999737	0.0998836	0.0998424	0.101474	0.100219	0.0985712	0.100072	0.100292	0.100217	0.0998861	0.100806	0.10055	0.0993977	0.100337	0.100324	0.100769	0.100324	0.100373
YBR044C	0.124007	0.12613	0.124062	0.124678	0.124937	0.125178	0.124335	0.124385	0.125455	0.126168	0.122317	0.124607	0.124967	0.12445	0.124426	0.124385	0.126056	0.123401	0.125679	0.125096	0.126086	0.124967	0.125877
YBR045C	0.110989	0.112048	0.111148	0.111226	0.112006	0.112514	0.110621	0.112939	0.110893	0.111086	0.109848	0.111899	0.111379	0.112159	0.111353	0.115019	0.111899	0.110219	0.111992	0.111899	0.111899	0.111899	0.111926
YBR047W	0.107481	0.104302	0.106271	0.10361	0.105186	0.108299	0.107305	0.102273	0.11107	0.107777	0.104798	0.106421	0.108333	0.106061	0.105276	0.107955	0.106181	0.105041	0.108124	0.107955	0.107955	0.107955	0.107906
YBR053C	0.106592	0.107985	0.105045	0.107002	0.105485	0.105706	0.107561	0.106128	0.107117	0.107753	0.104851	0.107145	0.107614	0.107521	0.106653	0.110771	0.106049	0.107057	0.107601	0.108553	0.108342	0.107095	0.107176
YBR054W	0.0646922	0.0663852	0.0653847	0.0659032	0.0649247	0.0670288	0.0660412	0.0660142	0.0678724	0.0660142	0.0647683	0.0657894	0.0656995	0.0660667	0.0655278	0.0660142	0.064186	0.0653605	0.0660882	0.0660142	0.0660142	0.0660142	0.0661353
YBR055C	0.132013	0.132842	0.13219	0.133525	0.132562	0.131549	0.134066	0.131717	0.132637	0.131682	0.131018	0.133005	0.133223	0.132273	0.131785	0.131347	0.132718	0.130435	0.133465	0.132869	0.133569	0.133569	0.133109
YBR056W	0.0934263	0.0968697	0.0921425	0.0933013	0.0949178	0.0945974	0.0933884	0.0943559	0.0941203	0.0924469	0.0933046	0.0935654	0.0935148	0.0940239	0.0938797	0.0936919	0.0950058	0.0932833	0.0933351	0.0938026	0.0936919	0.0936919	0.093096
YBR058C	0.117181	0.119468	0.117576	0.118635	0.119565	0.118193	0.117981	0.119161	0.117884	0.117551	0.117261	0.117742	0.118196	0.118759	0.118112	0.120012	0.119578	0.117131	0.118194	0.11812	0.118408	0.117884	0.118091
YBR059C	0.0894259	0.0892167	0.0889377	0.0885127	0.089516	0.0899851	0.0885723	0.0900117	0.0894533	0.0873481	0.0882787	0.0900815	0.0893868	0.0895561	0.0889821	0.0894259	0.0896378	0.0882542	0.0886439	0.0887424	0.0890654	0.0885716	0.0887875
YBR060C	0.121962	0.123413	0.121313	0.118298	0.122834	0.123453	0.12135	0.12282	0.121402	0.121028	0.120758	0.121442	0.121712	0.122403	0.121992	0.121748	0.123755	0.121006	0.12128	0.121272	0.121212	0.121212	0.122366
YBR061C	0.0861103	0.0825886	0.0856637	0.0572817	0.0822971	0.0827244	0.0855361	0.0826269	0.0858423	0.0861438	0.0827311	0.0851788	0.0861282	0.0842942	0.0840885	0.0826269	0.0847705	0.0819673	0.0860263	0.0861401	0.0858423	0.0869142	0.0858698
YBR065C	0.124425	0.125778	0.125416	0.120696	0.125471	0.125352	0.12557	0.125517	0.126722	0.126144	0.124177	0.125995	0.12576	0.125922	0.125378	0.126428	0.127455	0.125027	0.125745	0.12577	0.126358	0.125517	0.125588
YBR066C	0.10388	0.103191	0.101635	0.0877151	0.102859	0.10421	0.104398	0.104484	0.105068	0.104484	0.102556	0.103766	0.103277	0.103059	0.103433	0.102975	0.104452	0.102975	0.103043	0.102975	0.102975	0.102975	0.10429
YBR068C	0.0906135	0.092206	0.0897058	0.0908594	0.0916441	0.0905614	0.0927881	0.0897665	0.0925869	0.0912351	0.0897665	0.0910416	0.090823	0.0911934	0.0904896	0.0897665	0.0916733	0.0897245	0.0908615	0.0907683	0.0908594	0.090905	0.0914899
YBR069C	0.0995691	0.100199	0.0982721	0.0997514	0.101093	0.100306	0.100552	0.0996255	0.101431	0.10108	0.0977602	0.100008	0.0997325	0.100398	0.10005	0.100696	0.101561	0.0987612	0.0998439	0.0999227	0.0996255	0.0996255	0.100929
YBR070C	0.127355	0.125955	0.12934	0.129518	0.124438	0.127069	0.128386	0.130507	0.129106	0.130682	0.123971	0.127305	0.127426	0.127394	0.125612	0.126305	0.127706	0.126413	0.127779	0.127706	0.127706	0.127706	0.128244
YBR072W	0.0802889	0.0811638	0.0816929	0.0710691	0.0826801	0.078506	0.082537	0.078506	0.0806565	0.0819944	0.080121	0.0831572	0.0822269	0.082382	0.0812964	0.078506	0.0826294	0.078506	0.0819597	0.0811761	0.0816068	0.0816068	0.0816465
YBR076W	0.103286	0.102683	0.100104	0.0943938	0.10257	0.101835	0.102079	0.102347	0.105982	0.101702	0.100952	0.102973	0.102473	0.103704	0.102452	0.103286	0.103646	0.10177	0.102663	0.103391	0.103286	0.102347	0.101649
YBR077C	0.108199	0.110463	0.107744	0.0993078	0.110244	0.110615	0.108257	0.112289	0.10589	0.108135	0.105841	0.108685	0.108471	0.108312	0.108839	0.108199	0.110244	0.106154	0.10826	0.108199	0.108199	0.108199	0.108513
YBR079C	0.0811189	0.0809602	0.0807167	0.080234	0.0831789	0.0826729	0.0812947	0.083512	0.0820784	0.082027	0.0804684	0.0817212	0.0823269	0.0824484	0.0817612	0.0814608	0.082821	0.0805403	0.0823271	0.0819356	0.0824338	0.0818881	0.0817062
YBR080C	0.0699225	0.0686395	0.0693297	0.0708668	0.0702925	0.0697888	0.0694614	0.0708668	0.0695492	0.069412	0.0687014	0.069612	0.0699299	0.0696224	0.0698864	0.0691101	0.0704556	0.0682993	0.0699389	0.0696468	0.07036	0.0696041	0.0697407
YBR081C	0.111192	0.11088	0.109315	0.111141	0.111327	0.110604	0.109428	0.110354	0.110479	0.109832	0.108667	0.110426	0.110903	0.111075	0.110518	0.110604	0.11122	0.109683	0.11104	0.111006	0.111506	0.110864	0.111467
YBR083W	0.0946594	0.0926102	0.0917402	0.0937742	0.093937	0.0926742	0.0923399	0.0934148	0.0958019	0.0940513	0.0918402	0.0929945	0.0929169	0.0928113	0.0927428	0.092057	0.0920715	0.0927881	0.0935592	0.0934148	0.0934148	0.0934148	0.094058
YBR084W	0.0875574	0.0877843	0.0868194	0.0875705	0.0883504	0.087649	0.0873208	0.0870281	0.0878764	0.0876471	0.0864019	0.0874184	0.0874379	0.087787	0.0875524	0.0887357	0.0876893	0.0868179	0.087418	0.0876922	0.0873696	0.0870708	0.0878863
YBR085W	0.0973485	0.0940785	0.093735	0.0974026	0.0941558	0.094451	0.0962585	0.0941558	0.0963203	0.0973011	0.093735	0.0958565	0.097114	0.0977032	0.0946259	0.0963203	0.0941558	0.0954046	0.0977431	0.0978235	0.0979853	0.0974026	0.0985403
YBR086C	0.11266	0.112646	0.109833	0.113153	0.113315	0.112268	0.111579	0.113113	0.1144	0.113145	0.110666	0.113194	0.112975	0.112597	0.112715	0.112425	0.113603	0.110096	0.11357	0.112788	0.113457	0.112855	0.113792
YBR087W	0.0976526	0.0978538	0.0926969	0.0968793	0.0978211	0.0985915	0.0968478	0.0967136	0.0969862	0.0980047	0.0939098	0.0973396	0.096651	0.0971309	0.0968749	0.0995305	0.0976526	0.0959913	0.0971095	0.0968179	0.0967136	0.0976526	0.0967136
YBR088C	0.0782848	0.076915	0.0758681	0.0768691	0.0781561	0.0775711	0.0773103	0.0768691	0.0762879	0.0768289	0.0765014	0.0777271	0.0778129	0.0773696	0.077158	0.0768691	0.0786764	0.0753841	0.0774694	0.0765831	0.0775621	0.0781561	0.0770671
YBR091C	0.09	0.0910173	0.0909091	0.0939394	0.0909868	0.0936639	0.0914286	0.0909091	0.0947214	0.0936553	0.0910354	0.0916306	0.0929293	0.0924242	0.0916437	0.0909091	0.0934881	0.0892774	0.0938376	0.0929293	0.0939394	0.0939394	0.0940948
YBR095C	0.106481	0.106371	0.104595	0.106845	0.107688	0.106762	0.105313	0.107253	0.10571	0.106506	0.10436	0.1074	0.10679	0.107043	0.106418	0.106481	0.108041	0.104048	0.106665	0.106353	0.106956	0.106481	0.106501
YBR096W	0.0940115	0.093692	0.0914703	0.0925219	0.0923521	0.0919585	0.0931767	0.0937951	0.0921194	0.0932991	0.0914302	0.0929018	0.0930255	0.0924323	0.0922355	0.0952381	0.0924442	0.0923521	0.0924382	0.0924323	0.0923521	0.0923521	0.0925001
YBR097W	0.104346	0.104584	0.10262	0.104579	0.10468	0.104426	0.103355	0.103676	0.104799	0.104294	0.103528	0.104461	0.104516	0.104732	0.10421	0.103447	0.104144	0.103271	0.1048	0.104707	0.104962	0.104841	0.105009
YBR098W	0.125942	0.127276	0.12327	0.126107	0.124665	0.124841	0.124579	NaN	0.126984	0.126112	0.12319	0.125793	0.12583	0.125728	0.124977	0.124098	0.12507	0.124246	0.126331	0.126076	0.126318	0.126082	0.125997
YBR101C	0.083297	0.0834519	0.0807793	0.0833272	0.0835356	0.0847862	0.0829915	0.0842673	0.0859612	0.0818059	0.0809537	0.0827996	0.0826069	0.0836966	0.0827935	0.0831258	0.0821918	0.0806671	0.0832536	0.0831258	0.0835648	0.0831733	0.0828623
YBR102C	0.0998232	0.0999905	0.0974151	0.100068	0.101056	0.0996704	0.0991158	0.0994695	0.0999116	NaN	0.0977687	0.0991958	0.0992337	0.0995186	0.0995633	0.101374	0.100015	0.0993335	0.0995821	0.0995677	0.100082	0.0990827	0.0993221
YBR103W	0.118448	0.119479	0.117791	0.119849	0.120092	0.120444	0.118306	0.118961	0.119	0.119678	0.117645	0.118933	0.118841	0.119498	0.119165	0.118961	0.121377	0.117707	0.118928	0.119196	0.118729	0.118383	0.11845
YBR104W	0.0769272	0.0779582	0.0781145	0.0777184	0.0797721	0.0796143	0.0782395	0.0787879	0.0784295	0.0777462	0.0774972	0.0783069	0.0777778	0.0783389	0.0785226	0.079798	0.0798195	0.0762238	0.077774	0.07789	0.0783217	0.0777778	0.0762238
YBR105C	0.121991	0.122782	0.119584	0.122128	0.123863	0.123793	0.121631	0.122128	0.122216	0.122042	0.120563	0.122564	0.122799	0.123196	0.122791	0.121212	0.123044	0.120649	0.122671	0.123247	0.123044	0.122204	0.122057
YBR106W	0.0425926	0.0411313	0.042622	0.0438842	0.0441369	0.0431297	0.0423784	0.042328	0.0440917	0.0437059	0.0432344	0.0434198	0.0439741	0.0446796	0.0435751	0.042328	0.0441292	0.0405644	0.0437298	0.0438957	0.0436847	0.0440917	0.0424637
YBR107C	0.112737	0.109592	0.111232	0.112737	0.112424	0.110397	0.110647	0.114092	0.114529	0.113542	0.106847	0.111705	0.112918	0.112361	0.111163	0.108672	0.111526	0.111278	0.111867	0.111984	0.112737	0.111382	0.111486
YBR110W	0.10438	0.103947	0.103356	0.103973	0.101789	0.103367	0.101666	0.101751	0.105455	0.104899	0.101987	0.103761	0.104467	0.10315	0.102649	0.10101	0.101719	0.101637	0.104667	0.10459	0.104372	0.104714	0.104733
YBR111C	0.0918822	0.0928264	0.0917944	0.091954	0.0920645	0.0905172	0.0901067	0.0890805	0.0890805	0.0906968	0.0906569	0.0918172	0.0923372	0.0924329	0.0912284	0.0905172	0.091954	0.0900752	0.0921149	0.0916347	0.091954	0.091954	0.0920277
YBR114W	0.0885166	0.0871075	0.0852225	0.088942	0.0867445	0.0866238	0.088362	0.0875803	0.087078	0.0886936	0.0878683	0.0878769	0.0884527	0.0882499	0.0871327	0.0859351	0.0872425	0.08796	0.0880849	0.088048	0.0879688	0.0880012	0.0884437
YBR115C	0.0923079	0.0915866	0.0898697	0.0935311	0.0912605	0.0922796	0.0927283	0.0924754	0.0930852	0.0922809	0.090797	0.0923956	0.0929539	0.0927412	0.0920285	0.0919968	0.0919917	0.0921809	0.0932575	0.0931667	0.0938375	0.0932331	0.0934509
YBR120C	0.0864101	0.0877686	0.0867055	0.0888641	0.08813	0.0886782	0.0862933	0.0868191	0.0856317	0.0883529	0.086109	0.0881824	0.0877734	0.0868191	0.087067	0.0888641	0.088429	0.0904372	0.0878721	0.0878416	0.0876056	0.0888641	0.0879203
YBR121C	0.0655427	0.0649351	0.0653852	0.0667704	0.0659082	0.0658978	0.0655605	0.0647218	0.0667119	0.0663077	0.0652332	0.0664987	0.0664134	0.0662144	0.0658626	0.0657169	0.0660133	0.0659848	0.0664966	0.0667948	0.06587	0.0667119	0.0673497
YBR122C	0.114513	0.112025	0.111527	0.116435	0.110343	0.112189	0.113858	0.108614	0.114293	0.114174	0.110149	0.111557	0.113983	0.114232	0.111773	0.110487	0.110487	0.117113	0.114239	0.114128	0.114952	0.114232	0.114232
YBR123C	0.0972152	0.0973095	0.0959391	0.0990715	0.0960698	0.0960294	0.0979166	0.0975655	0.0965415	0.0970695	0.0963494	0.0972242	0.0980775	0.0981344	0.096625	0.0960294	0.0966613	0.09599	0.0984539	0.0985611	0.0979594	0.0980775	0.0984583
YBR125C	0.0712775	0.0713077	0.070925	0.0715139	0.0718035	0.0725273	0.0710176	0.071912	0.0702745	0.0720706	0.0706782	0.0709854	0.0714044	0.071536	0.0712284	0.071912	0.07274	0.0716517	0.0716058	0.072006	0.071066	0.071912	0.0713263
YBR126C	0.0734146	0.0738898	0.0741725	0.0743021	0.0738135	0.0746579	0.073621	0.0753299	0.0747663	0.0740698	0.0733978	0.0740498	0.0741202	0.0743218	0.0738365	0.0753299	0.0748152	0.073624	0.0740962	0.0740232	0.0746579	0.0739858	0.0746923
YBR127C	0.0421668	0.043031	0.0422955	0.0422955	0.0427245	0.042822	0.0422588	0.0422955	0.0422955	0.0423157	0.0420989	0.0423568	0.0423384	0.0424385	0.0425035	0.042939	0.0422955	0.042147	0.0423556	0.0422955	0.0425925	0.0422955	0.0422955
YBR128C	0.103597	0.100022	0.101766	0.103986	0.100895	0.100834	0.100609	0.101713	0.102741	0.102286	0.0996865	0.102449	0.102743	0.102142	0.101498	0.100747	0.100788	0.0997804	0.103595	0.103806	0.103645	0.103766	0.103769
YBR129C	0.084424	0.0844382	0.0827014	0.0831836	0.0838347	0.0824798	0.0825653	0.0834768	0.0853422	0.0850035	0.0827706	0.0832869	0.0835433	0.0844185	0.0831344	0.0824798	0.0844739	0.0830167	0.0826993	0.0829229	0.0824798	0.0824798	0.0834513
YBR130C	0.0911047	0.0915798	0.0913003	0.0917376	0.0930759	0.0904112	0.0905961	0.0916916	0.0894199	0.0920583	0.0908548	0.0917288	0.0918481	0.0923436	0.0910672	0.0901266	0.0932565	0.0900664	0.0916565	0.091735	0.0916916	0.0916916	0.0912502
YBR131W	0.134398	0.133292	0.133748	0.134303	0.135683	0.134561	0.132523	0.134303	0.133405	0.134362	0.131057	0.134168	0.13465	0.134303	0.13375	0.136192	0.135288	0.135066	0.134411	0.134644	0.134521	0.134303	0.134352
YBR133C	0.0994108	0.0985999	0.0984052	0.0993374	0.0993707	0.0985248	0.0986616	0.0976797	0.0991472	0.100139	0.0982195	0.0996891	0.0994047	0.0994974	0.0988493	0.0999488	0.0993064	0.0983722	0.0993132	0.0992453	0.09929	0.09929	0.0998681
YBR137W	0.0834091	0.0835859	0.0828844	0.0835017	0.0872054	0.0856902	0.0847186	0.0872054	0.0816498	0.0851146	0.0831673	0.0842953	0.0844893	0.083193	0.0848298	0.0872054	0.0870084	0.0879176	0.0834948	0.0835017	0.0835017	0.0835017	0.0835017
YBR138C	0.10804	0.107079	0.106673	0.107532	0.108835	0.106955	0.106353	0.106898	0.108147	0.108286	0.10658	0.108198	0.107744	0.107568	0.10718	0.109437	0.108802	0.106311	0.107516	0.107603	0.107532	0.107612	0.107386
YBR139W	0.115957	0.115353	0.113431	0.116118	0.116748	0.117028	0.1144	0.116849	0.111782	0.116031	0.114249	0.114886	0.115977	0.116086	0.116274	0.118158	0.116863	0.115893	0.115526	0.11554	0.11554	0.115622	0.115507
YBR141C	0.121943	0.124119	0.120754	0.122027	0.12273	0.12314	0.120301	0.124753	0.127903	0.118343	0.121014	0.121513	0.121861	0.121959	0.122104	0.11785	0.122781	0.121036	0.121802	0.122014	0.121795	0.120932	0.121795
YBR142W	0.102444	0.0991316	0.0996067	0.102826	0.101972	0.100671	0.101873	0.101802	0.101721	0.100778	0.101422	0.102433	0.102686	0.102953	0.101647	0.100143	0.101669	0.100653	0.103079	0.102861	0.103428	0.103045	0.102758
YBR143C	0.0763377	0.0761035	0.07437	0.0761035	0.0766694	0.0761727	0.0755164	0.0768645	0.0760299	0.0761035	0.075723	0.0758861	0.076205	0.0762303	0.0762649	0.0753425	0.0763464	0.0759864	0.0761205	0.0761035	0.0761035	0.0761035	0.0761035
YBR147W	0.0889016	0.0859146	0.0845619	0.0887747	0.0962299	0.0941453	0.0887656	0.0916936	0.0887706	NaN	0.0881877	0.0892523	0.0893923	0.091394	0.0910756	0.085719	0.0976153	0.0882914	0.0880871	0.0874386	0.0892872	0.088817	0.0892319
YBR149W	0.0791612	0.0785056	0.0767189	0.0776515	0.0783374	0.0793149	0.0769459	0.0774704	0.078662	0.0796745	0.0773764	0.0783445	0.0777924	0.0777387	0.0776851	0.0784365	0.0783954	0.0777676	0.0775569	0.0774704	0.0774704	0.0774704	0.0775695
YBR153W	0.126378	0.129696	0.125999	0.127705	0.129054	0.127175	0.126445	0.123768	0.127438	0.126152	0.12321	0.126573	0.12707	0.127784	0.126323	0.130461	0.129009	0.129534	0.127279	0.127263	0.127784	0.126445	0.127509
YBR154C	0.0530724	0.0527197	0.0521808	0.0526094	0.0511058	0.0535915	0.0520362	0.0541526	0.0540531	0.0536222	0.0523522	0.0528299	0.0525065	0.0525237	0.052438	0.0526094	0.0510662	0.0536778	0.0527534	0.0526952	0.0535591	0.0526094	0.0540735
YBR155W	0.101641	0.103997	0.0988294	0.102205	0.101767	0.103077	0.102739	0.103022	0.102791	0.100631	0.0999448	0.102105	0.102188	0.101996	0.101045	0.103627	0.101918	0.103162	0.102003	0.102092	0.1019	0.1019	0.101789
YBR156C	0.121197	0.11995	0.118105	0.120256	0.122238	0.120042	0.120226	0.120219	0.121295	0.119292	0.119708	0.121443	0.120808	0.121496	0.121068	0.123033	0.122089	0.121456	0.12078	0.121152	0.120979	0.120649	0.120196
YBR157C	0.0948088	0.095868	0.093562	0.0937918	0.0976077	0.0952888	0.0950216	0.0938684	0.0951705	0.0939091	0.0931992	0.0939304	0.0946496	0.0959662	0.0957492	0.0977746	0.0989105	0.0978748	0.094223	0.0938684	0.0951705	0.0940311	0.0940019
YBR158W	0.108772	0.109325	0.108826	0.10964	0.108955	0.108893	0.109135	0.108288	0.111703	0.1105	0.10933	0.109239	0.109538	0.109632	0.108868	0.107078	0.109691	0.108288	0.109316	0.109464	0.110103	0.109498	0.111034
YBR159W	0.0989725	0.104179	0.100473	0.100313	0.105054	0.1031	0.100396	0.0993556	0.102044	0.102888	0.0997946	0.100085	0.101144	0.101803	0.101765	0.105103	0.105245	0.10444	0.100356	0.100207	0.101198	0.100313	0.102303
YBR160W	0.0758437	0.0764091	0.0761967	0.0771258	0.0770972	0.0781393	0.0771258	0.0793554	0.0760109	0.0770561	0.0767696	0.0769665	0.0772001	0.0778071	0.0770695	0.0771258	0.0771258	0.0764397	0.0770509	0.0770638	0.0771258	0.0771258	0.0772973
YBR161W	0.0819362	0.0823382	0.0798679	0.0810704	0.0811172	0.0816214	0.0810959	0.0810704	0.0794254	0.0822012	0.0804363	0.0822661	0.0812436	0.0811666	0.0810355	0.0810704	0.0810704	0.0814034	0.0811196	0.0810195	0.0810704	0.0810704	0.0811447
YBR163W	0.13021	0.130443	0.128403	0.131816	0.130414	0.130572	0.131348	0.13021	0.128907	0.13065	0.129143	0.130887	0.131727	0.130779	0.130204	0.131348	0.129569	0.130079	0.131736	0.130494	0.13126	0.130352	0.131814
YBR164C	0.0636775	0.0634705	0.0621981	0.0634058	0.0634058	0.062253	0.0635611	0.0634058	0.0635227	0.0622169	0.0625503	0.0633195	0.0637681	0.0635064	0.0632579	0.0634058	0.06356	0.0631271	0.0634531	0.0634058	0.0634058	0.0634058	0.0648922
YBR165W	0.115299	0.115384	0.114	0.115422	0.112693	0.116525	0.11589	0.117397	0.116082	0.114512	0.113433	0.114257	0.115479	0.114266	0.113873	0.1138	0.112728	0.114261	0.115218	0.115132	0.114907	0.114999	0.11503
YBR166C	0.0896299	0.0881418	0.0872135	0.0889311	0.0899157	0.088849	0.0892591	0.0879851	0.0890698	0.0870257	0.0886044	0.0888902	0.0894471	0.0901781	0.0889302	0.0894471	0.0896026	0.0878164	0.0894635	0.089041	0.0893909	0.0894471	0.0887723
YBR167C	0.13227	0.133401	0.132519	0.132388	0.137237	0.136471	0.132793	0.132388	0.134447	0.132905	0.13265	0.133739	0.133491	0.133832	0.134346	0.132388	0.137116	0.132933	0.13252	0.13357	0.132388	0.132388	0.134449
YBR168W	0.134863	0.133454	0.134058	0.136023	0.135121	0.134607	0.135243	0.134461	0.137863	0.134008	0.134405	0.135151	0.135695	0.135266	0.134509	0.134461	0.134272	0.13477	0.135834	0.135534	0.135823	0.136071	0.135266
YBR169C	0.111639	0.111631	0.111198	0.111349	0.1141	0.1144	0.110954	0.11261	0.111023	0.112099	0.110887	0.112059	0.111993	0.11279	0.11258	0.115012	0.118057	0.110874	0.111637	0.111439	0.111519	0.111158	0.111876
YBR170C	0.102717	0.103134	0.102297	0.104108	0.102002	0.10235	0.10393	0.102488	0.104801	0.101813	0.103245	0.103799	0.104025	0.10354	0.102684	0.102488	0.102061	0.102713	0.104254	0.103954	0.104209	0.104209	0.104739
YBR171W	0.091868	0.0931102	0.0920558	0.091598	0.0934803	0.0942761	0.0919255	0.0917874	0.0917874	0.0918378	0.0918993	0.0918641	0.0923242	0.0923242	0.0929586	0.0966184	0.093432	0.0925307	0.0918175	0.0916085	0.0917874	0.0917874	0.0919113
YBR172C	0.138691	0.138748	0.136998	0.139864	0.139736	0.140137	0.140197	0.138779	0.139042	0.139424	0.136449	0.139281	0.139482	0.139487	0.138384	0.137901	0.139704	0.137124	0.139225	0.138828	0.13932	0.139218	0.139252
YBR173C	0.0731442	0.0734478	0.0719386	0.0728086	0.0730381	0.0740289	0.0726808	0.0728086	0.0757674	0.0744865	0.072094	0.0727021	0.0728086	0.0740515	0.0726278	0.0728086	0.0728562	0.0717761	0.0729338	0.0728086	0.0728086	0.0728086	0.0729233
YBR175W	0.0916286	0.0922874	0.0899456	0.0918844	0.0937263	0.0933867	0.0917858	0.0926244	0.0915761	0.0883005	0.0904406	0.0915262	0.0919255	0.0926244	0.0919719	0.0915761	0.0936949	0.0906086	0.0916153	0.091285	0.0915761	0.0906589	0.0915761
YBR176W	0.10243	0.103001	0.102903	0.102555	0.104806	0.104076	0.103343	0.10243	0.106381	0.103295	0.102652	0.102582	0.10281	0.103258	0.103527	0.103495	0.105784	0.101939	0.102541	0.101779	0.102758	0.102563	0.103522
YBR177C	0.0876475	0.0884166	0.0881268	0.0893198	0.0878337	0.0874229	0.0891488	0.0899705	0.0870206	0.0887491	0.0879425	0.0890575	0.089233	0.0888643	0.0880635	0.0884956	0.0871619	0.0876447	0.0894091	0.0888643	0.089233	0.089233	0.0892519
YBR180W	0.117922	0.120853	0.116207	0.117986	0.11812	0.119573	0.118003	0.119731	0.11915	0.117768	0.117	0.118069	0.118141	0.118406	0.118345	0.11915	0.118784	0.116778	0.118097	0.118083	0.11812	0.117986	0.11821
YBR182C	0.149706	0.14609	0.146799	0.149678	0.147299	0.150244	0.148681	0.149375	0.148639	0.147673	0.146799	0.14955	0.149325	0.148393	0.146781	0.147167	0.147997	0.143997	0.149473	0.148312	0.149035	0.147995	0.149431
YBR185C	0.0849462	0.0852535	0.085756	0.0856701	0.0859602	0.0868904	0.0849633	0.0848268	0.0889891	0.0859095	0.0853246	0.0867042	0.0864198	0.0854241	0.0861301	0.088411	0.0866824	0.0849187	0.0861686	0.0856233	0.0856539	0.0860215	0.0860521
YBR188C	0.221395	0.224755	0.220275	0.222222	0.227435	0.224801	0.221614	0.222222	0.222222	0.225325	0.220285	0.223123	0.222695	0.222616	0.223249	0.224586	0.227202	0.218403	0.222178	0.222222	0.222222	0.222222	0.222222
YBR192W	0.0786596	0.0783258	0.0777484	0.0784314	0.079953	0.0801667	0.0785588	0.0802469	0.0802469	0.078373	0.0779688	0.0784832	0.0786008	0.0789242	0.0789821	0.0811287	0.0802469	0.0771266	0.0784931	0.0784343	0.0784832	0.0784832	0.0784832
YBR193C	0.100223	0.100393	0.099289	0.10119	0.0981761	0.0986201	0.0992347	0.1	0.0998464	0.0984003	0.099289	0.0994189	0.100893	0.0996197	0.099056	0.0967262	0.0983093	0.0987866	0.101046	0.100612	0.101076	0.10119	0.0997024
YBR194W	0.187769	0.189516	0.186977	0.188172	0.191963	0.195503	0.189358	0.198925	0.196237	0.188508	0.187127	0.189785	0.188999	0.191308	0.190528	0.196237	0.185655	0.190033	0.188512	0.188321	0.188172	0.188172	0.188172
YBR195C	0.0937281	0.0955349	0.0927518	0.0946343	0.0947353	0.0954223	0.0945442	0.0938463	0.0957019	0.0936739	0.0936274	0.0945217	0.095002	0.094897	0.0945467	0.0946343	0.093863	0.0943312	0.0947254	0.0939776	0.0946343	0.0946343	0.0946343
YBR196C	0.0537947	0.0548243	0.0538742	0.0546161	0.0550999	0.0547639	0.0544425	0.0539449	0.0554173	0.0545079	0.0542618	0.0548315	0.0545455	0.0546122	0.0544302	0.0557467	0.0545838	0.0533905	0.054653	0.0548458	0.0545455	0.0546956	0.0545609
YBR197C	0.13945	0.13827	0.136935	0.142202	0.140712	0.1397	0.140411	0.14526	0.139193	0.140291	0.139292	0.141255	0.142202	0.141862	0.140472	0.139144	0.142234	0.139732	0.142453	0.142202	0.142202	0.142202	0.142515
YBR198C	0.0821174	0.0834564	0.0801263	0.082471	0.0837481	0.084053	0.082039	0.0839394	0.0826039	0.0826065	0.0813242	0.0821104	0.0826263	0.0827883	0.0828061	0.0844318	0.0841304	0.08081	0.0824262	0.082279	0.082701	0.0823485	0.0826263
YBR199W	0.122079	0.120558	0.11812	0.119966	0.119217	0.119844	0.118218	0.119713	0.1208	0.120161	0.118439	0.119577	0.120382	0.120072	0.119699	0.11828	0.120461	0.118445	0.120546	0.12047	0.120871	0.119892	0.119732
YBR200W	0.0691664	0.0695747	0.0679296	0.06837	0.0705318	0.0705065	0.0685733	0.0688656	0.0715052	0.0688091	0.0683391	0.0691807	0.068665	0.0691998	0.0692302	0.0701152	0.070709	0.0680324	0.0684345	0.0686984	0.0686341	0.0683391	0.0682947
YBR201W	0.10684	0.109164	0.103948	0.107566	0.109861	0.109491	0.106828	0.111635	0.110824	0.10741	0.105346	0.106993	0.106918	0.107792	0.107776	0.108491	0.109126	0.105225	0.107001	0.106918	0.106918	0.106918	0.106918
YBR202W	0.0823877	0.0823483	0.0809474	0.0829046	0.0828636	0.081811	0.0823258	0.0831363	0.082844	0.0816834	0.081812	0.0822357	0.0828999	0.0828955	0.0824478	0.0827423	0.0823651	0.0818331	0.0829158	0.0825453	0.0827423	0.0824468	0.083399
YBR205W	0.0954321	0.0961199	0.0953818	0.0962963	0.0983223	0.0965208	0.0962963	0.0979424	0.0975972	0.0961163	0.096182	0.0963747	0.0962963	0.0967535	0.096845	0.0987654	0.0983627	0.097056	0.0963731	0.0965706	0.0962963	0.0963992	0.097246
YBR207W	0.0844063	0.0847887	0.0843553	0.0839355	0.086515	0.0861073	0.0834784	0.0850691	0.0846086	0.0837754	0.0834309	0.0855789	0.0844029	0.084395	0.0849105	0.0843553	0.0865118	0.0854534	0.0842515	0.0839984	0.0855633	0.0836416	0.0843553
YBR208C	0.0928836	0.0925647	0.0915409	0.0935848	0.0920477	0.0927661	0.0921876	0.0922238	0.0936349	0.0937433	0.0920706	0.0922926	0.0934409	0.0934006	0.0923658	0.0925853	0.0918891	0.0923072	0.0936787	0.093449	0.0936699	0.093331	0.0936096
YBR210W	0.136236	0.12906	0.130642	0.134276	0.127684	0.131808	0.130942	0.134139	0.131808	0.132317	0.130254	0.128478	0.133051	0.131678	0.130371	0.127146	0.127146	0.132883	0.134304	0.133362	0.134139	0.134139	0.134198
YBR211C	0.10876	0.110057	0.108298	0.110078	0.108575	0.109091	0.109163	0.107786	0.114965	0.109898	0.108811	0.11013	0.110999	0.109609	0.10934	0.110862	0.107786	0.107707	0.110101	0.110464	0.109837	0.109837	0.109863
YBR213W	0.102061	0.0998268	0.101279	0.10303	0.100668	0.100055	0.102061	0.100727	0.101857	0.103939	0.0996633	0.10228	0.102788	0.102694	0.100814	0.100606	0.100606	0.10014	0.103587	0.102492	0.103403	0.10303	0.103497
YBR214W	0.089225	0.0908723	0.0913303	0.0918492	0.091335	0.0901071	0.0916374	0.0907372	0.0923227	0.0905797	0.0899146	0.0911573	0.0915774	0.0909473	0.0903999	0.0901071	0.0911931	0.0892831	0.0913556	0.0912273	0.0913674	0.0913674	0.0921267
YBR216C	0.116676	0.119381	0.115651	0.116047	0.118138	0.11771	0.11596	0.116947	0.118811	0.115774	0.11601	0.116289	0.116618	0.116755	0.116808	0.118923	0.118513	0.116833	0.116061	0.11596	0.11596	0.11596	0.116327
YBR217W	0.122144	0.120813	0.121698	0.120964	0.124349	0.122833	0.121698	0.121698	0.121698	0.121643	0.121698	0.121783	0.121936	0.121698	0.121878	0.121698	0.123488	0.12115	0.12181	0.121698	0.121698	0.121698	0.121698
YBR221C	0.0664778	0.0680264	0.0669796	0.067142	0.0669063	0.0672579	0.0669036	0.0678328	0.067046	0.0664496	0.0664025	0.0669295	0.0670499	0.0668291	0.0668291	0.0678328	0.0671601	0.0675548	0.0670238	0.0671302	0.0669295	0.0669295	0.0669526
YBR222C	0.0911291	0.0915974	0.0909896	0.0914661	0.0900149	0.0909091	0.0913961	0.0908534	0.092237	0.0908725	0.090964	0.0914078	0.0913027	0.09133	0.0904078	0.0902406	0.0896279	0.0907591	0.0915233	0.0914661	0.0914661	0.0914661	0.0914504
YBR223C	0.148869	0.148847	0.148427	0.149174	0.151417	0.151565	0.14851	0.149174	0.150891	0.149595	0.148418	0.149046	0.148889	0.149004	0.149539	0.150398	0.150137	0.148469	0.148754	0.148563	0.148563	0.148563	0.149017
YBR225W	0.104213	0.104252	0.103835	0.103623	0.105055	0.103318	0.103984	0.103974	0.105628	0.104282	0.103574	0.103963	0.103974	0.104529	0.103827	0.103017	0.103628	0.103809	0.104077	0.104182	0.103866	0.103799	0.103781
YBR228W	0.108296	0.102714	0.106778	0.108296	0.103867	0.103825	0.108202	0.105017	0.10611	0.109355	0.106915	0.107411	0.107495	0.10775	0.105779	0.103924	0.103924	0.106615	0.108345	0.108964	0.108296	0.108433	0.10838
YBR229C	0.119719	0.117803	0.118327	0.120299	0.120438	0.119308	0.120257	0.120511	0.11996	0.120955	0.119542	0.118917	0.121174	0.11979	0.119368	0.120197	0.120523	0.120626	0.121572	0.121612	0.1217	0.121724	0.121835
YBR233W	0.0982609	0.101027	0.0988212	0.099513	0.101351	0.100777	0.0993771	0.100917	0.100172	0.100917	0.0990564	0.100404	0.0997364	0.0998904	0.0998593	0.0986073	0.10208	0.0994364	0.0994662	0.0998048	0.099614	0.0993771	0.0993969
YBR234C	0.0815152	0.0815399	0.0803752	0.0812834	0.0829393	0.0834317	0.0813358	0.0831169	0.0813853	0.0818723	0.0807961	0.0817151	0.0815584	0.0820587	0.081774	0.0813853	0.0830985	0.0814519	0.081479	0.0814334	0.0813853	0.0813853	0.0827617
YBR235W	0.0941885	0.0947525	0.0928209	0.0945282	0.094835	0.0951802	0.0937606	0.095018	0.0948357	0.0951202	0.093779	0.0947489	0.0944034	0.094635	0.0943779	0.0947206	0.0946818	0.0953382	0.0945941	0.0946711	0.0946291	0.095018	0.0948731
YBR236C	0.0853582	0.0888833	0.0844216	0.0855982	0.0892786	0.0881354	0.0852764	0.0888288	0.0835878	0.0848242	0.0848242	0.0877391	0.0855743	0.0850149	0.0865328	0.088066	0.0888937	0.0879487	0.0850747	0.0850149	0.0852496	0.0850149	0.0850345
YBR237W	0.111331	0.10996	0.107914	0.109983	0.111466	0.110636	0.109355	0.111135	0.113498	0.109935	0.110025	0.110669	0.111083	0.111113	0.110549	0.111135	0.11121	0.110894	0.111312	0.111265	0.111135	0.111135	0.111215
YBR238C	0.0708466	0.0715846	0.0702102	0.0706814	0.0704002	0.0713469	0.0702209	0.0698358	0.0711111	0.071001	0.0698982	0.0707343	0.0704348	0.0703849	0.0704121	0.0716328	0.0703137	0.0702851	0.0704359	0.07031	0.0702851	0.0702851	0.0700201
YBR239C	0.0974919	0.0952238	0.0968537	0.0969583	0.095075	0.0973007	0.0966175	0.0969583	0.097297	0.0970171	0.096906	0.0964501	0.0967909	0.0966381	0.0961852	0.095075	0.0949949	0.0971031	0.097141	0.0972373	0.0977792	0.0969583	0.0982138
YBR240C	0.0976718	0.09792	0.0977499	0.098687	0.0962211	0.0961298	0.0970858	0.095122	0.0973392	0.100088	0.0980578	0.0978672	0.097832	0.0972571	0.0965255	0.095122	0.0962699	0.0971118	0.0988147	0.0987764	0.0983058	0.0988174	0.0981352
YBR241C	0.0975724	0.0980798	0.0966137	0.0984694	0.0989762	0.100143	0.0975735	0.0977877	0.0977877	0.0973404	0.0969451	0.0977228	0.0983785	0.099151	0.0983385	0.099151	0.0985564	0.0982596	0.0985431	0.0986587	0.0989413	0.099151	0.0984344
YBR242W	0.094865	0.0893559	0.0937337	0.0963909	0.0928695	0.0923038	0.0933507	0.0917966	0.0931913	0.0959807	0.092862	0.0941211	0.094679	0.0935013	0.0929941	0.0904019	0.0929836	0.0924403	0.0950128	0.0948185	0.0950152	0.0959807	0.0945395
YBR243C	0.0844503	0.0820534	0.0840214	0.0848826	0.0830854	0.0831477	0.0838034	0.0857124	0.0855447	0.0844828	0.0829387	0.0842276	0.0843761	0.0847225	0.0833952	0.0842276	0.0825576	0.0851984	0.0838869	0.0843513	0.0847415	0.0842276	0.0842276
YBR246W	0.132896	0.130785	0.131665	0.13324	0.131147	0.130975	0.13049	0.13324	0.132436	0.133025	0.130257	0.133158	0.132381	0.132046	0.131838	0.131521	0.130717	0.132777	0.133121	0.133144	0.13205	0.132381	0.13324
YBR247C	0.0807958	0.0805457	0.0801449	0.0818812	0.080896	0.0804408	0.0811614	0.0802571	0.0829724	0.080504	0.0803881	0.0812512	0.0819631	0.0814203	0.0807537	0.0809305	0.0808446	0.0813967	0.0818275	0.0816787	0.0816039	0.0816039	0.0816212
YBR248C	0.0924407	0.0927507	0.0921694	0.0927013	0.0933132	0.093375	0.0930994	0.0927722	0.0942694	0.0924897	0.0916336	0.0936046	0.0930133	0.0928727	0.0926261	0.0945805	0.0932339	0.0920767	0.0926642	0.0931406	0.093004	0.0927722	0.0921849
YBR249C	0.0536184	0.0511925	0.0526151	0.0528177	0.052258	0.0508045	0.0527135	0.0527648	0.0550835	0.0512487	0.0518789	0.0527221	0.053244	0.0531143	0.0524472	0.0509679	0.0527266	0.0532486	0.0531236	0.0528148	0.0533869	0.0536633	0.0526497
YBR250W	0.118326	0.117695	0.119535	0.118674	0.118246	0.117048	0.11779	0.118899	0.119597	0.119694	0.117627	0.118899	0.119026	0.118828	0.118354	0.116354	0.117397	0.119144	0.119537	0.1195	0.119535	0.119535	0.119553
YBR251W	0.0858127	0.0872969	0.0856563	0.0877607	0.0873445	0.0879575	0.0872969	0.0866785	0.0858057	0.0876254	0.0867085	0.0861116	0.0881215	0.0877006	0.087389	0.0866785	0.0876916	0.0876775	0.0885361	0.088362	0.0877607	0.088843	0.0877607
YBR252W	0.0977477	0.0974099	0.0988488	0.0990991	0.0954031	0.0995086	0.0983912	0.0990991	0.0990991	0.100155	0.0976914	0.0989918	0.0989489	0.0995996	0.0973928	0.0990991	0.0945946	0.0987526	0.0993092	0.0990991	0.0990991	0.0990991	0.0995034
YBR253W	0.101292	0.103497	0.100813	0.101838	0.101558	0.0996026	0.0989497	0.101838	0.106926	0.101667	0.0984986	0.0996262	0.101838	0.102901	0.100596	0.10457	0.101606	0.101838	0.101909	0.100927	0.101838	0.101838	0.101838
YBR254C	0.108239	0.107522	0.107912	0.107331	0.10877	0.1073	0.106223	0.108333	0.107845	0.105848	0.105782	0.108063	0.106818	0.10665	0.107625	0.106439	0.110348	0.106294	0.106545	0.106439	0.106439	0.106439	0.108333
YBR255W	0.105594	0.105509	0.106579	0.106041	0.105007	0.106126	0.105043	0.107085	0.106141	0.108494	0.104427	0.105304	0.105742	0.105939	0.10537	0.105646	0.10584	0.105573	0.105852	0.105833	0.106421	0.105826	0.105253
YBR256C	0.107259	0.108225	0.108878	0.112292	0.11221	0.10866	0.109421	0.108026	0.106856	0.116394	0.109207	0.11221	0.111559	0.1119	0.110238	0.109421	0.11221	0.111888	0.112366	0.112287	0.112746	0.11221	0.113605
YBR257W	0.105763	0.10487	0.106209	0.108442	0.104626	0.10671	0.105074	0.10487	0.107328	0.107437	0.104126	0.106004	0.107013	0.106391	0.105423	0.102489	0.104921	0.106976	0.107238	0.107119	0.107251	0.107251	0.108472
YBR258C	0.131659	0.132791	NaN	0.135622	0.131677	0.131172	0.13429	0.135622	0.140284	0.136715	0.131316	0.135178	0.135	0.134327	0.132839	0.13096	0.132448	0.135263	0.135735	0.135622	0.135622	0.135622	0.134546
YBR259W	0.14503	0.146061	0.145446	0.147239	0.146041	0.147337	0.143331	0.143994	0.14788	0.148401	0.144431	0.148049	0.146026	0.146306	0.145485	0.14593	0.146475	0.146413	0.146477	0.146279	0.146637	0.146413	0.146438
YBR260C	0.0987525	0.0966849	0.0983311	0.0990666	0.097424	0.0970744	0.0976003	0.0986209	0.0998165	0.0977108	0.0964529	0.0986123	0.0980645	0.098505	0.0976307	0.0956269	0.09762	0.0982127	0.0985681	0.0987747	0.0983034	0.0988024	0.0987128
YBR261C	0.100429	0.0963111	0.0983945	0.100396	0.0980155	0.0972818	0.0984672	0.100143	0.0972818	0.0984442	0.0965069	0.0998024	0.0995708	0.0993483	0.098698	0.0987124	0.097921	0.099923	0.100357	0.10062	0.101133	0.100143	0.100143
YBR262C	0.102875	0.104877	0.103307	0.103653	0.10565	0.103653	0.103564	0.103653	0.106769	0.105698	0.105038	0.103802	0.104276	0.104346	0.104314	0.103653	0.103653	0.103653	0.103688	0.103653	0.105091	0.103653	0.103893
YBR263W	0.0806857	0.0813937	0.0802972	0.0807875	0.0797605	0.0798	0.0801668	0.0794297	0.0796049	0.079451	0.0797126	0.0805935	0.0802444	0.0807498	0.0796835	0.0794297	0.0787508	0.0805264	0.0803721	0.0801463	0.0805786	0.0801086	0.0808049
YBR264C	0.10157	0.10234	0.101896	0.100859	0.101795	0.103422	0.101238	0.100859	0.107118	0.101689	0.0995004	0.10078	0.100859	0.102333	0.10101	0.100859	0.100859	0.100732	0.101113	0.100491	0.100859	0.100859	0.100859
YBR265W	0.0792976	0.0795943	0.0778614	0.0792976	0.0774604	0.0793921	0.0800097	0.0772208	0.0793981	0.079038	0.078014	0.0799405	0.0796438	0.0803361	0.0788609	0.0782592	0.0766905	0.0800964	0.0800145	0.0802207	0.0800166	0.0792976	0.0804159
YBR267W	0.092082	0.0912964	0.0921055	0.0926419	0.0914909	0.0919858	0.0920518	0.0906014	0.0954047	0.0927165	0.0911655	0.0922532	0.0925755	0.0926225	0.0914646	0.0897554	0.0899534	0.0919681	0.0924229	0.0927165	0.0922935	0.0924345	0.0933131
YBR268W	0.10982	0.111033	0.11127	0.114065	0.113581	0.113493	0.113616	0.114065	0.114065	0.112064	0.111925	0.113766	0.113017	0.112143	0.112509	0.110921	0.111255	0.113581	0.113643	0.113366	0.114549	0.114065	0.110921
YBR269C	0.12579	0.128274	0.12579	0.12579	0.129357	0.130368	0.125859	0.128188	0.130664	0.12579	0.124192	0.126133	0.12579	0.126323	0.127365	0.128188	0.12579	0.126159	0.125933	0.125257	0.12579	0.128188	0.12579
YBR270C	0.0971473	0.0983421	0.0979545	0.0975136	0.0959169	0.0960706	0.0966415	0.0981241	0.0987346	0.0977616	0.0976493	0.097659	0.0966996	0.0968692	0.0967428	0.0950716	0.0969551	0.0961517	0.0970238	0.0972762	0.0975136	0.0963943	0.0966839
YBR273C	0.111199	0.112975	0.111589	0.113119	0.11432	0.112683	0.112289	0.111504	0.113719	0.112005	0.111748	0.111904	0.112267	0.111885	0.112213	0.111504	0.11389	0.111152	0.11155	0.111546	0.111504	0.111504	0.111758
YBR274W	0.0905131	0.0901118	0.0908358	0.0902643	0.0925599	0.0906795	0.0900712	0.0910813	0.0912238	0.0917126	0.0895731	0.0904199	0.0907867	0.0906253	0.0907369	0.0898186	0.0923439	0.0904014	0.0902856	0.090485	0.09045	0.0905289	0.0916155
YBR275C	0.152831	0.152453	0.152465	0.153336	0.152633	0.152539	0.152828	0.151878	0.153122	0.152273	0.152094	0.152951	0.153056	0.153322	0.152212	0.152411	0.153109	0.152984	0.153111	0.153264	0.153078	0.152658	0.153531
YBR276C	0.135867	0.136051	0.135622	0.137701	0.135563	0.135993	0.135393	0.136218	0.135938	0.135818	0.135039	0.136041	0.134899	0.135302	0.135231	0.134569	0.134762	0.135457	0.135804	0.1356	0.136186	0.135806	0.136091
YBR278W	0.137797	0.137066	0.138105	0.139098	0.137764	0.135846	0.137519	0.13422	0.140724	0.138234	0.137134	0.137782	0.137364	0.137777	0.136858	0.135846	0.136538	0.137222	0.137563	0.137472	0.137472	0.137472	0.137472
YBR280C	0.105748	0.106242	0.106118	0.106551	0.104452	0.10665	0.106462	0.105123	0.105506	0.104547	0.105244	0.105589	0.106291	0.106105	0.105049	0.10554	0.106516	0.10578	0.106581	0.106466	0.106061	0.106126	0.106114
YBR281C	0.0967008	0.0971477	0.0965112	0.0973923	0.0972453	0.0962182	0.0964408	0.09708	0.0964561	0.0962149	0.095995	0.0965202	0.0964985	0.0965323	0.0963484	0.0963216	0.0957649	0.0964966	0.0965041	0.0964058	0.0963216	0.0964164	0.096341
YBR282W	0.113069	0.114041	0.112966	0.111936	0.115007	0.115421	0.111871	0.121006	0.109668	0.111936	0.112291	0.111828	0.112087	0.11244	0.113562	0.118738	0.115072	0.11173	0.111927	0.110802	0.111936	0.111936	0.117401
YBR283C	0.0931494	0.0968736	0.0934738	0.0929458	0.0952435	0.0959082	0.0937604	0.0949824	0.0936027	0.0938156	0.0931532	0.0934307	0.0933078	0.0940018	0.0942967	0.0949824	0.095618	0.0933635	0.0931332	0.0932098	0.0929458	0.0930306	0.0931198
YBR285W	0.102069	0.102545	0.102299	0.103448	0.101267	0.104075	0.101149	0.101149	0.101149	0.10467	0.101309	0.101368	0.102069	0.102043	0.101591	0.103448	0.101149	0.101149	0.101518	0.101277	0.101149	0.103448	0.101149
YBR286W	0.0960065	0.0951435	0.0949051	0.0963163	0.0945052	0.0950772	0.0960508	0.0932804	0.0962564	0.0976329	0.0947932	0.0962868	0.0964402	0.0956967	0.0950948	0.0944576	0.0945367	0.0966023	0.0963602	0.0966605	0.0968882	0.0963163	0.0961098
YBR287W	0.0923888	0.0912859	0.0878855	0.0921002	0.0887124	0.0875106	0.092845	0.0877938	0.0940495	0.0912056	0.0894596	0.0923184	0.0926744	0.0912552	0.090141	0.087015	0.0877275	0.0920474	0.0926223	0.0917666	0.0932455	0.0924667	0.0939154
YBR288C	0.0871713	0.0845542	0.0850201	0.0870457	0.0855692	0.0853994	0.086394	0.0835212	0.0871869	0.0865342	0.0844203	0.0863088	0.0868269	0.0864673	0.0859629	0.0835212	0.085939	0.0860111	0.0862863	0.0865438	0.086276	0.086276	0.0863819
YBR291C	0.0956667	0.0987698	0.0953704	0.0956863	0.0978063	0.0979798	0.0958095	0.0966667	0.0954839	0.0954861	0.0950617	0.0956614	0.0963704	0.097037	0.0968575	0.0977778	0.0973522	0.0964103	0.0963557	0.0962963	0.0977778	0.0966667	0.0957835
YBR293W	0.0994928	0.101126	0.0980622	0.100606	0.100132	0.100478	0.0994432	0.0985008	0.0990585	0.0989452	0.0982748	0.0982669	0.0992961	0.0997448	0.098518	0.097799	0.100696	0.0983928	0.0989337	0.098033	0.0992026	0.0999043	0.0992205
YBR294W	0.105064	0.106696	0.103675	0.103651	0.104737	0.104782	0.102837	0.105237	0.104007	0.104852	0.103418	0.105091	0.102334	0.104038	0.104378	0.104852	0.104598	0.103637	0.104013	0.103974	0.104081	0.103696	0.103831
YCL005W	0.0896523	0.0990721	0.0938128	0.0854717	0.0972666	0.0970167	0.093681	0.0968992	0.0918487	0.0906705	0.0929009	0.0943712	0.0912301	0.0929515	0.0931478	0.0956072	0.0975865	0.0934931	0.0905708	0.0906285	0.0905567	0.0905567	0.0905567
YCL008C	0.0962121	0.0973101	0.0970325	0.0932735	0.0947116	0.0959334	0.0974026	0.0944418	0.0978961	0.0956292	0.0966007	0.0956312	0.0941697	0.0973204	0.0950691	0.0978961	0.0970325	0.0946411	0.0981445	0.0986637	0.0987596	0.0987596	0.0980732
YCL009C	0.0592473	0.0599462	0.0584827	0.0481341	0.0602702	0.0597263	0.058894	0.0612903	0.0591745	0.0577621	0.058632	0.0569892	0.0505376	0.0597372	0.057554	0.0602151	0.0603066	0.0598842	0.0586784	0.0605137	0.0612076	0.0602599	0.0594706
YCL010C	0.0835198	0.0835748	0.0836053	0.0848622	0.0843942	0.0827506	0.0817616	0.0814685	0.0827506	0.0832714	0.0829465	0.0834832	0.0831779	0.0836765	0.0836312	0.0853147	0.0847691	0.0813699	0.0843223	0.0847449	0.0855119	0.0840326	0.0840326
YCL011C	0.0824462	0.0836256	0.0809216	0.0814156	0.0833764	0.0833764	0.0808736	0.0833764	0.0833764	0.0814626	0.0809539	0.0811985	0.0812059	0.0819983	0.0820218	0.0833764	0.0833764	0.0812297	0.0812053	0.0812231	0.0810508	0.0810508	0.0813092
YCL014W	0.137596	0.138251	0.135935	0.138456	0.138428	0.138166	0.136855	0.137223	0.139178	0.137173	0.136212	0.137727	0.137725	0.138321	0.137192	0.137833	0.138002	0.136645	0.138574	0.138896	0.138866	0.138274	0.138475
YCL016C	0.0934224	0.096522	0.0912935	0.0946987	0.0950062	0.0965561	0.0942723	0.0972719	0.0976953	0.0933076	0.0930554	0.093939	0.0939473	0.0947931	0.0946826	0.096397	0.0946845	0.093907	0.0945754	0.0944528	0.0949165	0.0938453	0.0955446
YCL017C	0.0767684	0.0735735	0.0731241	0.0767312	0.0744641	0.0733844	0.0740538	0.0740538	0.0767312	0.0762501	0.073094	0.0749463	0.0752586	0.0756528	0.0745738	0.0753925	0.074125	0.0743112	0.0765588	0.0766568	0.0769886	0.0741932	0.0763193
YCL025C	0.0734132	0.0698154	0.0703931	0.0723415	0.0698467	0.0697352	0.0693747	0.0689705	0.0711753	0.0717636	0.0710881	0.0707731	0.0713189	0.0708106	0.0707761	0.0715993	0.0698989	0.0701838	0.0724507	0.0726216	0.0726508	0.0721688	0.0734057
YCL038C	0.0827061	0.0836648	0.0810468	0.0829433	0.0841085	0.0835768	0.0827601	0.0834622	0.0847428	0.0831865	0.0816506	0.0830721	0.0826641	0.0829721	0.0831376	0.0828321	0.0850308	0.0827352	0.0828392	0.0828321	0.0828321	0.0828321	0.0830098
YCL039W	0.0988723	0.0997265	0.0993086	0.100235	0.0993334	0.0998742	0.100192	0.0982922	0.100466	0.0982643	0.0992838	0.100438	0.100226	0.100077	0.099721	0.100523	0.100068	0.0984638	0.100517	0.100523	0.100077	0.100096	0.100329
YCL040W	0.0856136	0.0864073	0.0857578	0.0860383	0.0860904	0.0857789	0.0847154	0.0869776	0.0870927	0.0853142	0.0841961	0.0861221	0.0856469	0.085667	0.0852571	0.0876429	0.087473	0.0852375	0.0856419	0.0856469	0.0856469	0.0856469	0.0856469
YCL043C	0.0782543	0.0774852	0.0757367	0.0751503	0.0777201	0.0787381	0.0752259	0.0771898	0.0783671	0.0761063	0.0752636	0.0769291	0.0756894	0.0762098	0.0768027	0.0778448	0.0777722	0.0775641	0.0762955	0.0759394	0.0759732	0.0772151	0.0765971
YCL044C	0.0874656	0.0844751	0.0839657	0.0846745	0.0848306	0.084457	0.0848796	0.0846745	0.0870668	0.0844502	0.0844198	0.0848644	0.0852061	0.0853833	0.0847309	0.083877	0.0855059	0.0846745	0.0855672	0.0855162	0.086208	0.0847077	0.0857378
YCL045C	0.110394	0.110601	0.108424	0.111253	0.109376	0.10979	0.109506	0.110723	0.110814	0.110026	0.109655	0.110282	0.110487	0.110088	0.110003	0.109518	0.108964	0.109847	0.110765	0.110824	0.111228	0.1108	0.111084
YCL048W	0.0983934	0.0953197	0.0962063	0.0979624	0.0970598	0.0969175	0.0962588	0.0943704	0.0976032	0.0961185	0.0961065	0.0972782	0.0971003	0.096366	0.0960975	0.0965256	0.0960671	0.0951993	0.097311	0.0973238	0.097244	0.0972739	0.0972624
YCL049C	NaN	0.126928	0.122175	0.125666	0.124573	0.124601	0.124601	0.125666	0.127692	0.12223	0.121598	0.124803	0.124175	0.124778	0.123987	0.127796	0.125484	0.123454	0.125088	0.124956	0.124601	0.124645	0.125829
YCL050C	0.0634387	0.0643099	0.0628804	0.064149	0.0636103	0.0623	0.0633191	0.0620177	0.0651567	0.0623088	0.0624922	0.0640388	0.063812	0.0640881	0.0634502	0.0630529	0.063141	0.0620177	0.0640726	0.0644332	0.0640881	0.0640881	0.0641943
YCL051W	0.108574	0.110559	0.108119	0.111189	0.10982	0.109173	0.108998	0.108263	0.108829	0.109955	0.107645	0.109314	0.109187	0.109476	0.109065	0.109225	0.110746	0.107919	0.109326	0.109288	0.109225	0.108706	0.109602
YCL052C	0.0974021	0.0967226	0.0962741	0.0988621	0.0996844	0.097413	0.0979902	0.0963229	0.0970192	0.0963979	0.0967559	0.0977542	0.0979217	0.0978328	0.0980509	0.098721	0.10025	0.0949087	0.0980171	0.0980105	0.0980446	0.0980216	0.0979217
YCL054W	0.0708185	0.0706716	0.0691182	0.070572	0.0698938	0.0698911	0.070344	0.0705022	0.07077	0.0692418	0.0696454	0.0704269	0.0706076	0.0702605	0.069947	0.0693159	0.0703003	0.0687867	0.0705273	0.0705022	0.0707151	0.0705351	0.0705427
YCL056C	0.123358	0.122033	0.12134	0.121212	0.121212	0.122675	0.121343	0.121212	0.121286	0.12114	0.120063	0.122088	0.121672	0.12134	0.121351	0.121212	0.121212	0.122627	0.121367	0.12134	0.122627	0.121212	0.121212
YCL059C	0.0696779	0.0721865	0.0705424	0.069783	0.0722366	0.0727464	0.070504	0.069783	0.0687654	0.0711631	0.069929	0.0707344	0.0698531	0.0708345	0.0714461	0.0718861	0.0732955	0.0709963	0.069885	0.0698414	0.0700257	0.069783	0.0701874
YCL061C	0.14902	0.147343	0.14724	0.149174	0.148289	0.148261	0.146778	0.147139	0.148954	0.147149	0.147628	0.148483	0.148262	0.148125	0.147681	0.14744	0.148298	0.145936	0.148931	0.148944	0.149153	0.148944	0.148967
YCL063W	0.0893868	0.0892363	0.0895883	0.0893019	0.0905088	0.0896317	0.0882103	0.0893478	0.0890708	0.0897381	0.0880359	0.0902771	0.0888794	0.0893044	0.0901048	0.0916897	0.0909257	0.088327	0.0896012	0.0893912	0.0893478	0.0901285	0.0897081
YCL064C	0.103679	0.104452	0.103224	0.102983	0.105545	0.105056	0.10287	0.104554	0.10592	0.10323	0.103185	0.104482	0.102712	0.103326	0.104107	0.105475	0.105533	0.10512	0.1032	0.103019	0.102712	0.102712	0.102807
YCR002C	0.0702599	0.0657191	0.0653751	0.0569472	0.0653883	0.0664227	0.0624315	0.0652031	0.0703631	0.0695891	0.0655758	0.0622546	0.0635519	0.0486912	0.0598242	0.0672671	0.0654007	0.0658382	0.0670669	0.0694457	0.0693311	0.0693311	0.0694634
YCR003W	0.109173	0.109419	0.10561	0.106264	0.107357	0.10886	0.108578	0.109354	0.105673	0.104995	0.107472	0.107457	0.106697	0.108449	0.10747	0.109354	0.108468	0.106428	0.106204	0.10704	0.106846	0.105807	0.105731
YCR004C	0.0792667	0.0770476	0.076963	0.0796078	0.0760684	0.0768485	0.076419	0.076	0.0813333	0.0807083	0.0765556	0.0786667	0.0758222	0.0745185	0.0755286	0.0773333	0.0761135	0.0768205	0.0797363	0.08	0.0794872	0.08	0.0813675
YCR005C	0.0892197	0.0873501	0.0861106	0.0887476	0.0878904	0.0876224	0.08578	0.0875567	0.0893294	0.0892288	0.0865022	0.0884864	0.0883831	0.087982	0.0871952	0.0882798	0.0879259	0.0868336	0.0889891	0.0890028	0.0890028	0.0890028	0.0898186
YCR009C	0.0618022	0.0604148	0.0595048	0.0555734	0.0589907	0.0612896	0.0572438	0.0611757	0.0624288	0.0621547	0.0600966	0.0567599	0.0616769	0.0569289	0.0580515	0.0611757	0.0625088	0.0598261	0.0616318	0.0631946	0.0636819	0.0636819	0.0637462
YCR010C	0.0886844	0.0899755	0.0890952	0.0884738	0.0889502	0.0902689	0.088894	0.0890952	0.0890952	0.0886184	0.0892093	0.0879774	0.0888604	0.0877911	0.0880206	0.0890952	0.0890952	0.0890952	0.0888499	0.0890952	0.0890952	0.0890952	0.0890952
YCR011C	0.0815166	0.0827139	0.0808658	0.0821917	0.0822089	0.0815584	0.0822173	0.0824531	0.0832007	0.081342	0.0812009	0.0823473	0.081924	0.0823649	0.0818021	0.0821356	0.0818384	0.0813054	0.0823212	0.0821886	0.0820135	0.0818446	0.0819077
YCR012W	0.0179856	0.0168437	0.0172307	0.0175859	0.01693	0.0174406	0.0173119	0.0167866	0.0175859	0.0172612	0.0173084	0.0177001	0.0173728	0.0174971	0.0172791	0.0175859	0.0168206	0.016971	0.0175979	0.0175859	0.0175859	0.0175859	0.0189182
YCR014C	0.124498	0.122671	NaN	0.124662	0.121903	0.122162	0.123964	0.121501	0.124047	NaN	0.12206	0.123554	0.123778	0.123647	0.122353	0.120381	0.121072	0.121371	0.124446	0.124331	0.124515	0.124323	0.1243
YCR015C	0.142768	0.142272	0.143364	0.143604	0.142387	0.142763	0.143067	0.143422	0.143088	0.143001	0.142487	0.143767	0.143353	0.143019	0.143234	0.142387	0.141704	0.142785	0.143572	0.143767	0.144059	0.143465	0.143475
YCR016W	0.140036	0.140682	0.140193	0.140186	0.142839	0.140935	0.140157	0.139188	0.141448	0.140071	0.14002	0.141933	0.141599	0.140381	0.140467	0.140318	0.140799	0.139362	0.1409	0.141197	0.140318	0.140318	0.140203
YCR017C	0.0942105	0.0939175	0.0938959	0.0950935	0.0936877	0.0942622	0.0950304	0.0946758	0.0952963	0.0938528	0.0932807	0.0943114	0.0948826	0.094626	0.094196	0.0939175	0.0936241	0.0926447	0.0952629	0.0952963	0.0948455	0.094334	0.0952609
YCR020C	0.0969416	0.0972723	0.0947983	0.0969416	0.0986431	0.0979237	0.0969857	0.0984848	0.0973897	0.0971408	0.0960414	0.0984114	0.0971474	0.0967702	0.0971939	0.0984848	0.0969416	0.0993158	0.0970872	0.0971131	0.0969416	0.0969416	0.0984848
YCR021C	0.0941934	0.0935661	0.0924111	0.0934068	0.0920234	0.0926329	0.0926537	0.0919978	0.0919334	0.0921226	0.0914434	0.0928057	0.0926632	0.0921642	0.0923406	0.0909998	0.0915519	0.0948383	0.0927687	0.0928849	0.0937635	0.0920394	0.0930214
YCR023C	0.0950537	0.0946454	0.09522	0.0958462	0.0948757	0.0957342	0.0956929	0.0943732	0.0960415	0.0957171	0.0942825	0.0952546	0.095716	0.0954317	0.0951101	0.0960063	0.0949987	0.094792	0.095984	0.0960971	0.0960063	0.0960063	0.0959622
YCR024C	0.115861	0.117471	0.115287	0.115886	0.117816	0.118262	0.116023	0.117278	0.116166	0.11582	0.115851	0.116924	0.115926	0.116715	0.116787	0.116602	0.116732	0.115874	0.115984	0.115888	0.115926	0.115926	0.115909
YCR026C	0.121161	0.122505	0.121453	0.122659	0.121888	0.122028	0.122452	0.123303	0.123712	0.121269	0.120176	0.121884	0.122222	0.122159	0.121782	0.123303	0.122007	0.120472	0.122795	0.12284	0.122831	0.123303	0.12291
YCR027C	0.106494	0.105813	0.106582	0.108081	0.108569	0.108081	0.107945	0.108081	0.106954	0.10823	0.106802	0.108232	0.107658	0.107904	0.107465	0.109668	0.109871	0.107348	0.108199	0.108169	0.108081	0.109668	0.108244
YCR030C	0.0957443	0.0942739	0.0938424	0.0953704	0.0935364	0.0936701	0.0950453	0.0941132	0.0938834	0.0946874	0.0935977	0.0950595	0.0949631	0.0953839	0.0940981	0.0933633	0.0935309	0.0936518	0.0957166	0.0961963	0.0950362	0.0948631	0.0950554
YCR032W	0.117097	0.118005	0.115555	0.117821	0.116648	0.116476	0.117548	0.117258	0.11689	0.116874	0.11512	0.117564	0.117279	0.117549	0.116501	0.116797	0.116807	0.116632	0.117953	0.117873	0.11818	0.117892	0.117727
YCR033W	0.125608	0.124874	0.124176	0.126281	0.124134	0.123361	0.124284	0.124991	0.125622	0.124286	0.122565	0.125004	0.124875	0.124493	0.123964	0.124176	0.12421	0.125137	0.125924	0.126032	0.126663	0.126349	0.126084
YCR036W	0.13478	0.133453	0.133081	0.135834	0.13545	0.134705	0.134446	0.136588	0.130702	0.134461	0.132314	0.134897	0.135536	0.133739	0.134137	0.134615	0.13428	0.133477	0.136452	0.136478	0.136588	0.136588	0.135652
YCR043C	0.0832268	0.0831981	0.0823732	0.0830966	0.0830966	0.0833333	0.083171	0.0883049	0.0962014	0.0827711	0.0832301	0.0829726	0.0836174	0.0832413	0.0835964	0.0830966	0.0828196	0.0830966	0.083184	0.0830966	0.0830966	0.0830966	0.0854337
YCR044C	0.107807	0.108222	0.10646	0.108739	0.107857	0.108827	0.106711	0.110396	0.109487	0.107387	0.106481	0.108363	0.107307	0.108125	0.107909	0.107671	0.108637	0.107671	0.107752	0.107973	0.107671	0.107709	0.107717
YCR045C	0.0949125	0.0920815	0.0920143	0.0942749	0.0927237	0.0917098	0.0908281	0.091525	0.0932078	0.0917579	0.0899159	0.0930413	0.0929704	0.0913744	0.0916482	0.0922025	0.0928368	0.0947562	0.0941415	0.0946867	0.094235	0.0930212	0.0935575
YCR046C	0.105865	0.10466	0.105843	0.107214	0.108222	0.106417	0.105444	0.1041	0.106061	0.106183	0.105107	0.105967	0.106061	0.105952	0.105664	0.106061	0.108355	0.10591	0.106097	0.106278	0.106061	0.106061	0.106061
YCR047C	0.0729249	0.0783338	0.0760382	0.0746726	0.0788149	0.0804787	0.0749953	0.078722	0.0764234	0.0734382	0.0755014	0.0755589	0.0759845	0.0746962	0.0759772	0.0750988	0.078722	0.0745414	0.0752701	0.0751659	0.0750988	0.0752498	0.0763065
YCR051W	0.100523	0.0976404	0.0971599	0.101732	0.0950903	0.0955293	0.099637	0.0971599	0.0997155	0.0972534	0.0964126	0.0990106	0.0992526	0.0985717	0.0978847	0.0986547	0.0956652	0.0956652	0.101767	0.101976	0.101644	0.101644	0.101644
YCR052W	0.115065	0.117163	0.114997	0.115297	0.115704	0.116019	0.114519	0.116019	0.115205	0.115401	0.114646	0.115532	0.114974	0.114732	0.115248	0.116701	0.115845	0.114656	0.115472	0.115148	0.115337	0.115337	0.115268
YCR053W	0.0774139	0.077796	0.0758785	0.0776976	0.077952	0.0780229	0.0760812	0.0783172	0.078507	0.0768939	0.0763493	0.0778016	0.0775601	0.0779412	0.0775641	0.0772716	0.0776974	0.0767058	0.0775294	0.0774247	0.0779641	0.0773169	0.0775326
YCR054C	0.116019	0.115285	0.114006	0.116525	0.118593	0.117427	0.115669	0.116108	0.116108	0.116514	0.114499	0.116389	0.116541	0.115911	0.116417	0.11729	0.116812	0.116017	0.116192	0.116141	0.116108	0.116133	0.116123
YCR057C	0.078783	0.0800738	0.0772352	0.078418	0.0789348	0.0789765	0.0782899	0.077871	0.0788863	0.0784075	0.0767438	0.0782627	0.0783717	0.0785267	0.0781876	0.0789439	0.0789599	0.0774583	0.0784652	0.0785664	0.0782286	0.0782286	0.0784854
YCR060W	0.125893	0.116497	0.123181	0.126401	0.116613	0.117965	0.124405	0.119048	0.125	0.120257	0.114625	0.123441	0.123611	0.118056	0.117875	0.116071	0.118794	0.119505	0.124967	0.125	0.125	0.125	0.127976
YCR061W	0.100162	0.0998398	0.0998843	0.101147	0.100997	0.0996656	0.100947	0.099926	0.102127	0.0992109	0.100024	0.100726	0.100643	0.100324	0.100805	0.0995605	0.101244	0.0996637	0.101199	0.101257	0.101048	0.101596	0.099691
YCR065W	0.0892593	0.0908394	0.0882385	0.0908393	0.0891406	0.0905296	0.0893424	0.0884774	0.0943164	0.0887235	0.0880348	0.0895944	0.0895238	0.0894702	0.0893901	0.0890653	0.0891903	0.0896034	0.0897018	0.089627	0.0901822	0.0896189	0.0898808
YCR066W	0.128235	0.125605	0.126725	0.127484	0.12617	0.125497	0.127445	0.125435	0.129753	0.127311	0.125994	0.128037	0.127393	0.12756	0.12658	0.125435	0.126118	0.127484	0.127706	0.127863	0.127484	0.127484	0.128149
YCR068W	0.109265	0.10895	0.106784	0.109597	0.108143	0.109987	0.109247	0.107602	0.109418	0.107722	0.107335	0.108942	0.109095	0.108953	0.108384	0.106962	0.107616	0.109177	0.109715	0.109557	0.110161	0.109521	0.109603
YCR069W	0.124635	0.12567	0.124816	0.125903	0.124332	0.125473	0.125179	0.126042	0.122513	0.12526	0.12458	0.125397	0.124861	0.125174	0.124621	0.125	0.125155	0.124279	0.124689	0.124074	0.125	0.123958	0.125801
YCR071C	0.0989796	0.0996923	0.0982615	0.0997732	0.10082	0.100186	0.0995141	0.0997732	0.0997732	0.0994898	0.098293	0.0999892	0.0994709	0.0997732	0.0996129	0.0975057	0.0997732	0.0997732	0.0997902	0.0997732	0.0995988	0.0997732	0.0997732
YCR072C	0.069835	0.0694843	0.0705931	0.0658431	0.0716015	0.0701785	0.0696919	0.0707071	0.0715823	0.0691123	0.0689754	0.0697227	0.0699319	0.0696304	0.0704395	0.0726451	0.0726451	0.0694648	0.069485	0.0689844	0.0694151	0.0694151	0.0689016
YCR075C	0.100639	0.101049	0.101561	0.100939	0.102521	0.103309	0.100751	0.101916	0.102575	0.101991	0.100922	0.100578	0.100724	0.100864	0.102193	0.103193	0.102106	0.103291	0.100905	0.100639	0.100639	0.100692	0.100704
YCR079W	0.0906711	0.094685	0.0919371	0.0925733	0.0935255	0.0935908	0.0914876	0.0924041	0.0943477	0.0915376	0.091046	0.0915157	0.0913963	0.0923877	0.0922946	0.0943953	0.0936892	0.0934876	0.0920508	0.0916093	0.0914454	0.0915376	0.0932418
YCR081W	0.10212	0.103396	0.101387	0.101785	0.102903	0.102433	0.101461	0.10184	0.101344	0.101168	0.101264	0.101474	0.101446	0.101515	0.101716	0.101607	0.102831	0.102055	0.101635	0.101581	0.101356	0.10119	0.101436
YCR082W	0.085377	0.0878133	0.0853627	0.0855062	0.0878914	0.0880902	0.0857277	0.0880902	0.0845893	0.0867175	0.0855062	0.0858754	0.0855062	0.0859369	0.0858194	0.0855062	0.0878703	0.0904754	0.0855737	0.0859369	0.0878914	0.0855062	0.0855062
YCR083W	0.0920573	0.0890997	0.0898438	0.091299	0.0898771	0.0913826	0.0921131	0.0911458	0.0946741	0.0933431	0.0904948	0.0913938	0.0909722	0.0905671	0.0903304	0.09375	0.0885417	0.0911458	0.091379	0.0912905	0.0911458	0.0913628	0.0911458
YCR084C	0.0695209	0.069399	0.068712	0.0693762	0.0696637	0.0690646	0.0690635	0.0683666	0.0701577	0.0693829	0.0693013	0.0694054	0.0693345	0.0694707	0.0688888	0.0688183	0.0695294	0.0690962	0.069425	0.0694707	0.0692699	0.0692699	0.0699593
YCR086W	0.0701888	0.0724825	0.0694907	0.0694907	0.0712359	0.07076	0.0695406	0.0729811	0.0725307	0.0695453	0.0696362	0.0694076	0.0694907	0.0697816	0.0702135	0.0712359	0.0710874	0.0700277	0.0695949	0.0694907	0.0694907	0.0694907	0.0697592
YCR088W	0.0917706	0.0934432	0.0921277	0.0920974	0.0912176	0.092444	0.0914438	0.0899188	0.0909538	0.0922847	0.0912502	0.0922271	0.0915165	0.0918196	0.0915388	0.0910081	0.0914601	0.0924745	0.0921117	0.0924	0.0920555	0.0920748	0.0927678
YCR090C	0.109745	0.112477	0.112224	0.111111	0.112839	0.112436	0.111163	0.111111	0.112933	0.111054	0.111617	0.111024	0.111233	0.111313	0.111921	0.111111	0.112778	0.10971	0.111193	0.111111	0.111111	0.111111	0.111391
YCR091W	0.121256	0.122415	0.121214	0.122383	0.122264	0.122798	NaN	0.122005	0.122703	0.121589	0.119671	0.121103	0.120842	0.121623	0.121413	0.122464	0.122318	0.121369	0.121011	0.120806	0.121052	0.120226	0.12184
YCR093W	0.0928872	0.0921721	0.0922565	0.0941244	0.0928064	0.0926149	0.0928287	0.0927611	0.0931416	0.0932477	0.0926463	0.0931001	0.0936862	0.093737	0.092994	0.0928872	0.0928671	0.0934452	0.0940245	0.0939384	0.093991	0.0938399	0.0939789
YCR094W	0.0911603	0.0914337	0.0907115	0.0918731	0.0904572	0.0906772	0.0947257	0.0913729	0.0939239	0.0923561	0.0913139	0.0914539	0.0918264	0.0913257	0.0909692	0.0905226	0.0905407	0.0903263	0.0920764	0.0917036	0.0922233	0.0913729	0.0917436
YCR095C	0.0943985	0.0969435	0.0937659	0.0954464	0.094488	0.0939143	0.0929555	0.0982553	0.0963595	0.0946396	0.0932175	0.0946259	0.0954392	0.0955515	0.0945822	0.0927456	0.0939765	0.0944409	0.095569	0.0954494	0.0955005	0.0955005	0.0955711
YDL001W	0.0753498	0.0724606	0.0721015	0.0714584	0.0733013	0.0729101	0.0722894	0.0724882	0.0733614	0.0728749	0.0724345	0.0740718	0.0727976	0.0725742	0.0726601	0.0724882	0.0737059	0.0729642	0.0726441	0.0724882	0.0724882	0.0724882	0.0757603
YDL002C	0.0887255	0.0896359	0.0882353	0.0875625	0.088361	0.0888295	0.0893091	0.0882353	0.0898693	0.0881842	0.0882353	0.0883131	0.0883442	0.0885076	0.0885984	0.0882353	0.0883396	0.088361	0.0882963	0.0883261	0.0882353	0.0882353	0.0882353
YDL003W	0.125782	0.126349	0.124802	0.126635	0.126241	0.126343	0.125689	0.127075	0.128067	0.126498	0.125651	0.126216	0.126663	0.125945	0.126286	0.127251	0.125725	0.12689	0.126631	0.126565	0.127206	0.126076	0.126076
YDL004W	0.0942876	0.0916552	0.0914005	0.0970096	0.0932497	0.0935441	0.0908123	0.0933559	0.0960274	0.0962674	0.0949375	0.0941446	0.0951503	0.0926658	0.0936487	0.0954263	0.0933559	0.0973374	0.0953954	0.0954263	0.0954263	0.0954263	0.0935152
YDL006W	0.0776596	0.077381	0.0768322	0.0768322	0.0780445	0.0779067	0.0779466	0.0768322	0.0768703	0.0772385	0.0768486	0.0775076	0.0771474	0.0772262	0.0774172	0.0768322	0.0798753	0.0767412	0.0768895	0.0768322	0.0768322	0.0768322	0.0780142
YDL008W	0.0905977	0.0945927	0.0928157	0.088944	0.0943775	0.096203	0.0940333	0.0943775	0.0903614	0.0904869	0.0905846	0.0901702	0.0903614	0.0917001	0.092694	0.0943775	0.094762	0.0908248	0.0907037	0.0905846	0.0914427	0.0903614	0.0904129
YDL013W	0.0914541	0.0936776	0.0934941	0.0706429	0.0949094	0.0939394	0.0922413	0.094868	0.0943477	0.0916926	0.0916945	0.0916678	0.0917856	0.0921799	0.0927718	0.0927175	0.0948337	0.0916836	0.0918399	0.0920007	0.0916422	0.0911046	0.0916284
YDL015C	0.0610202	0.0613647	0.0617645	0.0588923	0.0625473	0.0616779	0.0632786	0.0623599	0.0634317	0.0634987	0.0616007	0.0632276	0.0635747	0.0626577	0.0628363	0.0666472	0.0626792	0.0632669	0.0634837	0.0633127	0.0634317	0.0634317	0.0634317
YDL017W	0.0847381	0.0845881	0.0833201	0.083972	0.0834603	0.0848246	0.0840492	0.0827368	0.0869913	0.0839671	0.0834477	0.0839867	0.0847928	0.0836117	0.0839961	0.083393	0.083393	0.0847558	0.0852587	0.0854344	0.0853615	0.0853615	0.0847053
YDL018C	0.0891969	0.0868387	NaN	0.0927074	0.090218	0.0886297	0.0868597	0.0901046	0.087345	0.0902473	0.0869909	0.0897534	0.0896129	0.0880561	0.0886911	0.0901046	0.0901673	0.0908988	0.091552	0.0914976	0.0915795	0.0915795	0.0901046
YDL019C	0.0947619	0.0960414	0.0937721	0.0949337	0.0952262	0.0949684	0.0941444	0.0950864	0.0963342	0.0943953	0.0937667	0.0952842	0.0947922	0.0944662	0.0948215	0.0945672	0.0956608	0.0944274	0.0948112	0.0948845	0.0948467	0.0948268	0.0945605
YDL020C	0.101531	0.100931	0.0974411	0.10303	0.100249	0.10022	NaN	0.100606	0.100411	0.101534	0.098064	0.100491	0.10198	0.0997643	0.100661	0.100606	0.100477	0.100746	0.102506	0.102626	0.102751	0.102424	0.102253
YDL022W	0.0655264	0.0671299	0.0653516	0.0653989	0.0668161	0.0663265	0.0654475	0.0670996	0.067127	0.0650534	0.0649147	0.0656823	0.0654556	0.0652099	0.0655879	0.0653989	0.066792	0.0642869	0.0654623	0.0655879	0.0653989	0.0653989	0.0654207
YDL027C	0.131953	0.134267	0.129799	0.132346	0.13253	0.13498	0.132561	0.134412	0.13343	0.130997	0.130578	0.130992	0.132226	0.132157	0.132054	0.134412	0.132502	0.13177	0.132067	0.132113	0.132834	0.13207	0.133097
YDL028C	0.0902951	0.0914467	0.0896928	0.0909231	0.0908482	0.0912656	0.0906873	0.0918202	0.0923402	0.0905538	0.0902043	0.090596	0.0904839	0.0906098	0.0907462	0.0913844	0.0911527	0.0909152	0.0906008	0.0906824	0.090513	0.090513	0.0905577
YDL030W	0.119142	0.118954	0.115769	0.119995	0.118612	0.119281	0.118251	0.118484	0.119151	0.116624	0.117831	0.119409	0.1184	0.117996	0.118453	0.118484	0.120683	0.120122	0.119573	0.119702	0.119448	0.11911	0.119817
YDL031W	0.0890353	0.0896529	0.0885167	0.0891301	0.0893329	0.0897164	0.0888522	0.0902516	0.089679	0.0891833	0.0882792	0.089829	0.0895503	0.0892837	0.0894613	0.0899229	0.089804	0.0897712	0.0896837	0.0897403	0.0895942	0.0895942	0.0897037
YDL036C	0.123896	0.124615	0.122276	0.124615	0.1236	0.12455	0.12297	0.123896	0.12443	0.123896	0.123366	0.123347	0.124232	0.123776	0.123536	0.123896	0.12388	0.121791	0.124373	0.124416	0.124782	0.122456	0.12504
YDL040C	0.104866	0.104838	0.103829	0.104855	0.105041	0.105025	0.10445	0.105839	0.105939	0.105231	0.104148	0.105098	0.105061	0.105147	0.104842	0.104283	0.104755	0.103206	0.105201	0.105104	0.105061	0.105839	0.104472
YDL042C	0.0941688	0.0934604	0.0915997	0.0927983	0.0923044	0.0935766	0.0921316	0.0929364	0.0935233	0.0919461	0.090858	0.0928246	0.0921539	0.0920561	0.0923555	0.0941101	0.0936731	0.0940198	0.0924678	0.0923496	0.0923496	0.0923496	0.0927859
YDL043C	0.148258	0.147527	0.144485	0.148911	0.147588	0.147883	0.146171	0.15038	0.149172	0.148469	0.145369	0.147229	0.147217	0.147606	0.147467	0.145386	0.149026	0.148363	0.14803	0.148854	0.148652	0.147883	0.148
YDL045C	0.0863735	0.0879324	0.0867777	0.0887079	0.0905454	0.0901885	0.0867225	0.0887079	0.0905643	0.0878936	0.0875467	0.0882426	0.0884908	0.0894921	0.0880828	0.0897937	0.0886848	0.0880398	0.0889064	0.0889492	0.0892091	0.0887079	0.0892369
YDL047W	0.0731771	0.0717634	0.071875	0.071875	0.0717415	0.0713068	0.0715774	0.0729167	0.0697917	0.071875	0.0715856	0.072371	0.0722917	0.0728009	0.0717698	0.0708333	0.0708777	0.0720353	0.0720616	0.071875	0.0723558	0.071875	0.0729167
YDL048C	0.107302	0.107722	0.105439	0.109295	0.107245	0.107567	0.10679	0.104801	0.108116	0.104885	0.105392	0.107859	0.108407	0.107205	0.106953	0.107505	0.108282	0.105321	0.108813	0.109233	0.108857	0.108857	0.108805
YDL049C	0.115518	0.115093	0.112413	0.115142	0.114881	0.114228	0.115332	0.113349	0.11534	0.113334	0.112275	0.115462	0.115497	0.114753	0.113877	0.113101	0.116212	0.1111	0.115718	0.115648	0.11558	0.11558	0.116723
YDL051W	0.068124	0.0668604	0.066602	0.0613423	0.0669994	0.0668643	0.0664659	0.0665349	0.0653272	0.0679314	0.0672897	0.0665924	0.0673401	0.066606	0.0666719	0.0677426	0.066612	0.0666278	0.0666455	0.0665349	0.0665349	0.0665349	0.0669065
YDL052C	0.061568	0.0617951	0.0604288	0.05734	0.0639901	0.0616029	0.0610902	0.0635965	0.0614035	0.0624646	0.0609619	0.0616124	0.0618421	0.0609162	0.0615586	0.060307	0.064553	0.0608131	0.0608716	0.0604288	0.0608131	0.060307	0.0603632
YDL053C	0.115789	0.115038	0.114522	0.115789	0.11399	0.113876	0.117945	0.114035	0.119298	0.115844	0.113743	0.115288	0.116491	0.114912	0.114071	0.114035	0.115752	0.109852	0.115894	0.115692	0.115789	0.114035	0.115789
YDL054C	0.109334	0.108854	0.106738	0.10887	0.109181	0.109265	0.10836	0.107461	0.108233	0.10838	0.107964	0.107884	0.10851	0.108259	0.10791	0.109514	0.108873	0.107197	0.108186	0.108145	0.108145	0.108145	0.10804
YDL055C	0.0493977	0.0493321	0.0477984	0.0504525	0.0478929	0.0493889	0.0494822	0.0477984	0.0524322	0.0497551	0.0491157	0.049947	0.0493331	0.0488727	0.0485146	0.0487192	0.0477984	0.0488609	0.0498531	0.0507143	0.0514817	0.0487192	0.0493567
YDL057W	0.131873	0.130017	0.128734	0.132871	0.13089	0.129543	0.12755	0.129909	0.129747	0.131105	0.128329	0.129766	0.130782	0.130133	0.130207	0.129909	0.130852	0.128902	0.131957	0.13216	0.131923	0.131923	0.132414
YDL058W	0.133758	0.134798	0.132581	0.135065	0.135681	0.134653	0.133211	0.134297	0.135705	0.135075	0.13364	0.134227	0.134403	0.134412	0.134315	0.135293	0.135338	0.132104	0.13502	0.134926	0.134915	0.134915	0.134929
YDL059C	NaN	0.103035	0.0993613	0.0993613	0.105954	0.105303	0.099157	0.103283	0.101894	0.0975971	0.0996563	0.0991162	0.099513	0.100071	0.101503	0.104672	0.106445	0.100185	0.0991574	0.0991162	0.0991162	0.0991162	0.099223
YDL060W	0.108175	0.108863	0.107121	0.108999	0.108782	0.109498	0.10918	0.108999	0.111084	0.108484	0.106863	0.108677	0.108802	0.108834	0.10835	0.108999	0.10908	0.107146	0.109057	0.109046	0.108999	0.108999	0.109096
YDL063C	0.107649	0.105571	0.105743	0.108427	0.10701	0.106963	0.107967	0.106817	0.107267	0.108327	0.10508	0.108197	0.107962	0.108129	0.106909	0.108427	0.107148	0.105661	0.108549	0.108427	0.108758	0.108427	0.108441
YDL065C	0.127668	0.127392	0.126541	0.127981	0.127532	0.128502	0.127185	0.129117	0.127185	0.127577	0.125279	0.127553	0.127765	0.128151	0.1278	0.125253	0.128028	0.125773	0.127859	0.128527	0.128151	0.127185	0.1283
YDL067C	0.0333333	0.0335317	0.0333333	0.0333333	0.0333333	0.0333333	0.0333333	0.0333333	0.0333333	0.0335069	0.0333333	0.0338624	0.0337037	0.0333333	0.0337823	0.0333333	0.0333333	0.0333333	0.0337479	0.0333333	0.0333333	0.0333333	0.0333333
YDL069C	0.13666	0.137074	0.129696	0.135744	0.137245	0.136364	0.135946	0.135573	0.136742	0.13589	0.130984	0.13578	0.135283	0.135654	0.13409	0.134124	0.13582	0.13011	0.135703	0.135573	0.135573	0.135573	0.135573
YDL070W	0.0772308	0.0774832	0.0752888	0.0780124	0.0759921	0.0763394	0.0755814	0.0753619	0.0781864	0.0785621	0.0760233	0.0773857	0.07741	0.0778652	0.0762329	0.07741	0.0759066	0.0759921	0.0776164	0.0774954	0.07741	0.07741	0.0779615
YDL072C	0.0892602	0.085397	0.0851571	0.0795236	0.0877897	0.0863042	0.0857355	0.0877897	0.0863665	0.0869727	0.0865188	0.0877119	0.0877897	0.0876081	0.0864528	0.0877897	0.0878244	0.0857786	0.0880396	0.0877897	0.0877897	0.0878577	0.0878316
YDL073W	0.124607	0.124314	0.121835	0.120764	0.124181	0.124471	0.122285	0.124108	0.125415	0.124515	0.121811	0.124059	0.124477	0.124466	0.123652	0.122735	0.124267	0.120725	0.124676	0.124764	0.125415	0.12441	0.124917
YDL074C	0.105494	0.104782	0.104224	0.101437	0.104033	0.105048	0.104373	0.104617	0.10454	0.105106	0.104531	0.105068	0.105312	0.105486	0.104597	0.105091	0.103728	0.10396	0.105708	0.105697	0.105747	0.105565	0.10554
YDL076C	0.126158	0.124374	0.123792	0.127617	0.125192	0.124705	0.12	0.123164	0.129944	0.12334	0.122065	0.12537	0.126704	0.126616	0.123232	0.120904	0.124919	0.120035	0.127734	0.127997	0.127684	0.127684	0.126554
YDL077C	0.0993535	0.0974284	0.0969408	0.0992004	0.0972013	0.097518	0.0967231	0.0980202	0.0998082	0.0988754	0.0965572	0.0980444	0.0984012	0.09844	0.0974154	0.0969408	0.0988929	0.0964036	0.0986324	0.098634	0.0986991	0.0982107	0.0983246
YDL078C	0.0850775	0.0849045	0.0836779	0.0850775	0.0867422	0.0877202	0.0864618	0.0870155	0.0872031	0.0876211	0.0842027	0.0849852	0.0850775	0.0850775	0.085655	0.0879845	0.0870361	0.0855247	0.0850992	0.0853467	0.0850775	0.0850775	0.0851024
YDL084W	0.056994	0.0560055	0.055787	0.0569809	0.0536916	0.0554451	0.0560906	0.0555804	0.0570685	0.0571615	0.0550017	0.0562181	0.056374	0.0565724	0.0554075	0.0548363	0.0529683	0.0543212	0.0568297	0.0565724	0.0570685	0.0570685	0.0569158
YDL085W	0.0948718	0.091719	0.0935287	0.0947677	0.0931921	0.0923909	0.0947584	0.0932234	0.0949565	0.0947688	0.0936983	0.0944735	0.0945665	0.0943088	0.0935626	0.0926129	0.0941197	0.0916267	0.0947005	0.0946819	0.0948671	0.0944444	0.094601
YDL086W	0.0778469	0.0780436	0.0762242	0.0771492	0.0757044	0.0763424	0.0769074	0.076874	0.0803828	0.0771299	0.0761105	0.0766512	0.0771079	0.0771339	0.0765314	0.0757044	0.0757044	0.0750746	0.0772711	0.076874	0.0771439	0.076874	0.0781935
YDL088C	0.128297	0.128227	0.128646	0.129247	0.128784	0.131369	0.12824	0.128938	0.128855	0.128434	0.128434	0.129368	0.128571	0.12885	0.12884	0.128816	0.128855	0.128722	0.128401	0.128544	0.128205	0.128205	0.128675
YDL090C	0.109115	0.108112	0.108605	0.109077	0.109433	0.108095	0.108614	0.108305	0.111417	0.109945	0.107009	0.108783	0.108974	0.109077	0.108414	0.108305	0.111999	0.106169	0.109169	0.10912	0.109255	0.109077	0.109136
YDL091C	0.118129	0.117894	0.116464	0.117032	0.119244	0.118561	0.117243	0.117763	0.119249	0.116575	0.117225	0.116893	0.117359	0.117398	0.117718	0.118494	0.120609	0.11647	0.117419	0.118169	0.117032	0.117032	0.11707
YDL097C	0.0843609	0.0834577	0.0831263	0.0841355	0.0834963	0.0828283	0.0834632	0.0835946	0.0849541	0.0837861	0.0821046	0.0843244	0.0837989	0.0834669	0.0833701	0.0843609	0.082062	0.082062	0.0840692	0.0842331	0.0835946	0.0835946	0.0852057
YDL098C	0.141779	0.144661	0.14397	0.143745	0.145443	0.145921	0.143306	0.143745	0.147936	0.144012	0.143816	0.143745	0.143828	0.144505	0.144919	0.148873	0.145417	0.144271	0.143873	0.143745	0.143745	0.143745	0.143745
YDL099W	0.152544	0.153542	0.152143	0.152303	0.154329	0.155982	0.15167	0.153267	0.156281	0.150136	0.150939	0.151707	0.152303	0.152357	0.152683	0.153267	0.154025	0.152229	0.151832	0.152303	0.152081	0.15138	0.15134
YDL100C	0.0673709	0.0661972	0.0666667	0.0683789	0.0686891	0.0682032	0.0671227	0.0676056	0.0668181	0.0664613	0.0676056	0.0670691	0.0679186	0.0667188	0.0668943	0.0666667	0.0678054	0.0653666	0.0682258	0.0676056	0.0694836	0.0676448	0.0700614
YDL101C	0.0887926	0.0902564	0.0862778	0.0889185	0.0906068	0.0903785	0.087616	0.0893763	0.0900457	0.0885454	0.0865841	0.088388	0.0882522	0.0887277	0.0889701	0.0906733	0.0903973	0.0866326	0.0880308	0.0875028	0.0880294	0.0880792	0.0887444
YDL102W	0.0881906	0.0873168	0.086737	0.0888978	0.0881299	0.0879643	0.0876008	0.0872192	0.0899123	0.0877789	0.0865909	0.0880577	0.0883323	0.0878601	0.0877822	0.0869156	0.0879878	0.0871258	0.0884199	0.0887708	0.0888772	0.0884462	0.088994
YDL103C	0.105341	0.104795	0.100852	0.101776	0.104294	0.104919	0.104338	0.107012	0.106809	0.102936	0.101549	0.103754	0.103068	0.102461	0.103044	0.102827	0.104	0.101321	0.102822	0.102348	0.102603	0.102096	0.1028
YDL104C	0.112084	0.113228	0.111231	0.113252	0.112086	0.114899	0.112563	0.116904	0.114374	0.111339	0.110743	0.111341	0.112765	0.111866	0.111861	0.113636	0.11202	0.111374	0.11264	0.112638	0.113196	0.112853	0.11284
YDL105W	0.103409	0.101282	0.0991599	0.103285	0.100895	0.10126	0.102625	0.10081	0.102859	0.10148	0.102208	0.102932	0.10323	0.102919	0.101418	0.100937	0.100951	0.100048	0.103319	0.103285	0.103285	0.103285	0.103349
YDL106C	0.0842136	0.0818662	0.081475	0.0842654	0.0834989	0.0848805	0.082495	0.0833333	0.0830494	0.0818479	0.080937	0.0831936	0.0825117	0.0823226	0.0825983	0.0839202	0.0833333	0.0817082	0.0827948	0.0836594	0.0827465	0.0821841	0.0828669
YDL107W	0.13744	0.13629	0.135493	0.138359	0.138982	0.139205	0.137345	0.13886	0.139685	0.13744	0.136782	0.138635	0.137517	0.138281	0.137595	0.135072	0.13888	0.135437	0.137958	0.138965	0.138787	0.137045	0.13835
YDL109C	NaN	0.128791	0.122059	0.125132	0.127603	0.12804	0.123816	0.126866	0.125739	0.125872	0.124195	0.124247	0.12462	0.124202	0.1254	0.125374	0.128154	0.12391	0.124634	0.124574	0.124504	0.123874	0.124345
YDL112W	0.121849	0.122116	0.120608	0.122636	0.12083	0.120731	0.119896	0.120902	0.122395	0.121471	0.120227	0.120914	0.121163	0.121631	0.120623	0.122076	0.120764	0.119503	0.122295	0.122514	0.122284	0.122284	0.122626
YDL113C	0.0869039	0.0886204	0.0862005	0.0866835	0.0887491	0.0890768	0.0863022	0.0888419	0.0877416	0.0875015	0.0860139	0.0885958	0.0868092	0.0866599	0.0875763	0.0883251	0.0889079	0.0863772	0.0875518	0.0883825	0.0882854	0.0873131	0.0873048
YDL114W	0.137329	0.134835	0.135754	0.137332	0.135708	0.135482	0.135043	0.135874	0.138272	0.137591	0.134093	0.135001	0.135443	0.136892	0.135003	0.135874	0.136951	0.134548	0.136992	0.136951	0.136951	0.136951	0.137034
YDL116W	0.112048	0.112733	0.110859	0.11264	0.111891	0.111458	0.111292	0.110833	0.112268	0.111062	0.110642	0.110942	0.112086	0.112158	0.111685	0.110833	0.112462	0.110657	0.112681	0.112693	0.112914	0.112667	0.112679
YDL117W	0.105699	0.106163	0.10294	0.10612	0.10453	0.10513	0.103671	0.10568	0.106126	0.105318	0.103609	0.105057	0.105037	0.104351	0.104557	0.103812	0.104972	0.102662	0.105928	0.106054	0.1066	0.10568	0.105632
YDL119C	0.100866	0.100804	0.099507	0.100458	0.103091	0.10183	0.100897	0.102814	0.10236	0.103727	0.10089	0.100602	0.100794	0.100595	0.101076	0.102814	0.102768	0.101149	0.100766	0.10077	0.100649	0.101732	0.100649
YDL120W	0.0861905	0.0894558	0.0843386	0.0857143	0.0895238	0.0898701	0.0885442	0.0895238	0.0867588	0.0860714	0.0855556	0.0866213	0.0864762	0.0867725	0.0882155	0.0895238	0.0895238	0.0865934	0.0857214	0.0857143	0.0857143	0.0857143	0.0857631
YDL122W	0.0990241	0.102739	0.0983298	0.0986583	0.102497	0.102067	0.0990798	0.10278	0.100329	0.100263	0.0980887	0.099416	0.0990994	0.099592	0.100658	0.101918	0.102748	0.0996762	0.0988348	0.0988622	0.0986341	0.0990446	0.0995632
YDL123W	0.110586	0.110689	0.10537	0.108747	0.106625	0.107672	0.108342	0.106383	0.113933	0.108821	0.106056	0.108409	0.108274	0.10809	0.106504	0.106747	0.104723	0.104383	0.108836	0.10901	0.108747	0.108846	0.108683
YDL124W	0.107202	0.104121	0.10967	0.108347	0.107549	0.104947	0.107506	0.103398	0.108483	0.10646	0.10714	0.11136	0.105883	0.106179	0.106028	0.103398	0.10433	0.103071	0.106916	0.10896	0.105528	0.105572	0.108668
YDL126C	0.0782297	0.0781784	0.0766019	0.0789943	0.0776285	0.0777874	0.0785373	0.0777512	0.0785615	0.0782496	0.0778066	0.0777702	0.0783892	0.07846	0.0771833	0.0773525	0.0758933	0.0771991	0.078928	0.0789917	0.0791927	0.0789474	0.0789985
YDL127W	0.113783	0.111133	0.110916	0.114352	0.112432	0.112512	0.112247	0.110557	0.112812	0.114556	0.11214	0.114141	0.113425	0.114022	0.111839	0.111632	0.11177	0.111881	0.113887	0.114201	0.113369	0.113783	0.114169
YDL128W	0.0833738	0.082945	0.0831086	0.0833333	0.0820679	0.0819359	0.0830559	0.0825243	0.0833855	0.0822462	0.0837491	0.0838727	0.0832255	0.0826142	0.081609	0.0817152	0.0819046	0.0801593	0.0834782	0.0833783	0.0835823	0.0833333	0.0834578
YDL129W	0.099829	0.0984688	0.0981883	0.0986652	0.0990556	0.0978543	0.0982245	0.0969213	0.100379	0.0993919	0.0964462	0.099962	0.0989738	0.0981957	0.0971862	0.0957811	0.0992746	0.0955179	0.0989703	0.0992018	0.0987633	0.0980616	0.0999328
YDL132W	0.0824959	0.0839461	0.0828794	0.0829489	0.0847683	0.0842617	0.0826564	0.0825572	0.0845852	0.0829248	0.0824085	0.0836057	0.0832516	0.0832879	0.0836717	0.0837418	0.084976	0.0824849	0.083367	0.0834014	0.0835847	0.0829419	0.0833857
YDL133W	0.107154	0.107306	0.105784	0.108962	0.106564	0.107168	0.105958	0.107306	0.107699	0.106664	0.105403	0.106436	0.10624	0.105784	0.106353	0.105784	0.106772	0.10473	0.106556	0.106545	0.107247	0.106577	0.106896
YDL134C	0.0804505	0.0814028	0.0815816	0.0804981	0.0829066	0.0813268	0.0799485	0.0801802	0.0797152	0.0796171	0.0796296	0.0821536	0.0814414	0.0815315	0.0818182	0.0801802	0.0834004	0.0813583	0.0803516	0.0815816	0.0810118	0.0801802	0.080134
YDL135C	0.0651888	0.0668543	0.0644955	0.0640394	0.067534	0.0653829	0.0646024	0.0640394	0.0673765	0.0640394	0.0637201	0.0646649	0.0646962	0.0655902	0.0659468	0.0673235	0.0672187	0.0629026	0.0640823	0.0640394	0.0640394	0.0640394	0.0640394
YDL138W	0.117407	0.11852	0.115257	0.116701	0.11767	0.118728	0.116021	0.116855	0.118542	0.116882	0.115358	0.115921	0.116971	0.11671	0.116699	0.118162	0.117291	0.11605	0.116907	0.116637	0.117659	0.116455	0.116486
YDL139C	0.127381	0.129411	0.122106	0.129464	0.124008	0.125135	0.12483	0.123512	0.128024	0.129697	0.122127	0.124291	0.12629	0.125744	0.124925	0.123512	0.123544	0.128091	0.129226	0.128803	0.128434	0.127976	0.129693
YDL141W	0.090464	0.0912427	0.0909115	0.0908059	0.0925548	0.0924878	0.0908464	0.0912599	0.0917734	0.088456	0.0890557	0.0907775	0.0907454	0.0909115	0.091004	0.0898127	0.0927379	0.0892932	0.0908813	0.0909383	0.0912599	0.0907775	0.0907775
YDL143W	0.0738071	0.0746712	0.0714931	0.0726154	0.0738386	0.0732085	0.0724883	0.0725783	0.0745093	0.0728343	0.0716069	0.0730584	0.0728724	0.0729634	0.073113	0.0738386	0.0743614	0.0732569	0.0729616	0.0732085	0.0730146	0.0726308	0.0731277
YDL145C	0.074487	0.0727656	0.0705922	0.0733092	0.0721163	0.0730096	0.0722526	0.0726567	0.0738107	0.0732026	0.071609	0.0730925	0.0725458	0.072934	0.0724242	0.072934	0.072344	0.0725287	0.0733158	0.0733192	0.073382	0.0732229	0.0731829
YDL146W	0.0933754	0.096475	0.090987	0.094198	0.0953178	0.095482	0.09247	0.0947503	0.0929762	0.09234	0.0931481	0.0943032	0.0936325	0.0940051	0.0942151	0.095421	0.095421	0.0958853	0.0941372	0.0941542	0.0949567	0.0940796	0.094114
YDL147W	0.0911809	0.0899263	0.0889387	0.0905214	0.0919474	0.0915206	0.0900918	0.0904335	0.0903612	0.0905736	0.0896342	0.0906114	0.0904335	0.0908487	0.0905241	0.0896861	0.0920396	0.0888812	0.0905144	0.090475	0.0904335	0.0904335	0.0902035
YDL148C	0.0996058	0.099391	0.0981351	0.0991734	0.0987059	0.0989426	0.0995084	0.100213	0.100385	0.0998405	0.0981922	0.0994497	0.0988977	0.0991398	0.0988761	0.099391	0.0992948	0.0993277	0.099098	0.0990028	0.0991064	0.0989971	0.099001
YDL149W	0.115047	0.115988	0.111608	0.115672	0.113432	0.114235	0.114773	0.11463	0.11576	0.115902	0.111882	0.115154	0.114496	0.114685	0.113804	0.114963	0.113529	0.115271	0.115407	0.115445	0.115759	0.115297	0.114929
YDL150W	0.103798	0.104014	0.102929	0.10456	0.103836	0.103242	0.103765	0.103876	0.103926	0.103537	0.102595	0.103876	0.103618	0.103876	0.103195	0.103101	0.103447	0.103459	0.103879	0.103876	0.103876	0.103876	0.103955
YDL153C	0.0973407	0.0974573	0.0969224	0.09838	0.0974062	0.0977548	0.0979914	0.0958399	0.097029	0.0983577	0.0966005	0.0979463	0.0977356	0.0976537	0.0971005	0.0968931	0.0974645	0.0971361	0.0980956	0.0979463	0.0981893	0.0979463	0.0980003
YDL154W	0.131172	0.133957	0.129433	0.132696	0.132693	0.132054	0.131092	0.131418	0.133319	0.13288	0.129776	0.131962	0.131958	0.132216	0.131764	0.13326	0.13268	0.133401	0.1318	0.132318	0.131021	0.132554	0.133024
YDL155W	0.106202	0.104596	0.103661	0.104788	0.104194	0.104722	0.106401	0.104651	0.105851	0.103997	0.104188	0.104688	0.105168	0.105383	0.104722	0.105426	0.104387	0.10489	0.105623	0.105125	0.106202	0.103941	0.105009
YDL156W	0.0965389	0.0979747	0.0947259	0.0943143	0.0975111	0.0971548	0.0961799	0.0972704	0.0962239	0.0965548	0.0945669	0.0970584	0.0960406	0.0967756	0.0966728	0.0972704	0.0978253	0.0981512	0.0967553	0.0968817	0.0972704	0.0966608	0.0973357
YDL160C	0.0779421	0.0780408	0.0761414	0.0612175	0.076827	0.0772638	0.0766695	0.0773833	0.0775106	0.0773422	0.0755022	0.0775398	0.0774271	0.0770546	0.0770446	0.0767258	0.0760684	0.077535	0.0780334	0.0774271	0.0782936	0.0780408	0.0778385
YDL164C	0.0969138	0.0980713	0.0960794	NaN	0.0979656	0.0974967	0.096964	0.0971773	0.100237	0.0985223	0.0969821	0.0973655	0.0973823	0.0972505	0.0974257	0.0971773	0.0982332	0.0969408	0.0974952	0.0976897	0.0977178	0.0971773	0.0982921
YDL165W	0.0907118	0.0903398	0.0871914	0.0883374	0.0904113	0.0890152	0.0885913	0.0885417	0.0920139	0.0916884	0.0883247	0.0885417	0.0885417	0.0886381	0.0893834	0.0902778	0.0912012	0.0889423	0.0886324	0.0885417	0.0885417	0.0885417	0.0888978
YDL166C	0.0967401	0.0981952	0.0919889	0.0999388	0.0962264	0.0970309	0.0969566	0.0965718	0.0966804	0.0968874	0.092446	0.0986561	0.0978063	0.0979747	0.0966908	0.0982553	0.0948883	0.0951473	0.099386	0.0990035	0.0986438	0.0999388	0.0982553
YDL168W	0.106492	0.104832	0.10609	0.104243	0.107365	0.106176	0.107038	0.105559	NaN	0.104685	0.10543	0.108023	0.107708	0.107915	0.105731	0.104711	0.107256	0.104059	0.108215	0.10834	0.108104	0.108104	0.108169
YDL169C	0.128047	0.129091	0.12835	0.130093	0.129224	0.129562	0.128519	0.131313	0.129784	0.131035	0.127321	0.129056	0.128548	0.128762	0.128201	0.129832	0.129107	0.128236	0.129351	0.129009	0.12835	0.129832	0.12854
YDL170W	0.086072	0.0828555	0.0840385	0.0860794	0.0837807	0.0829045	0.0838369	0.0833047	0.0843597	0.0854863	0.0824574	0.0854117	0.0844658	0.0848771	0.0836329	0.0839337	0.0840943	0.0822888	0.0853376	0.0850867	0.0858205	0.0851915	0.0850464
YDL171C	0.0760485	0.0777094	0.0751677	0.0766113	0.0769454	0.077075	0.075578	0.0761727	0.0763281	0.0771241	0.0749258	0.0761653	0.0759449	0.0757499	0.0762242	0.0760174	0.076642	0.0762086	0.0762376	0.076259	0.0760652	0.0760627	0.0761966
YDL173W	0.101717	0.101139	0.100295	0.10073	0.101743	0.0999597	0.100601	0.100664	0.101486	0.100318	0.0995878	0.10019	0.100591	0.100234	0.100306	0.0984496	0.103398	0.100324	0.100648	0.10128	0.100664	0.100664	0.101374
YDL174C	0.0889366	0.0890922	0.087857	0.0892151	0.0886	0.0891166	0.0889266	0.0890528	0.0882517	0.0896759	0.0876501	0.0882907	0.0890528	0.0882612	0.0887695	0.087949	0.0898278	0.0896047	0.089061	0.0890221	0.0894348	0.088041	0.088883
YDL175C	0.0811902	0.0843027	0.0809594	0.0820171	0.0830197	0.0825648	0.0810866	0.0832675	0.0813663	0.0808822	0.0807446	0.0812891	0.0811419	0.0811741	0.0819109	0.0823013	0.0823013	0.081781	0.080989	0.0805836	0.0810378	0.0804092	0.0831436
YDL176W	0.100705	0.0980287	0.0982918	0.0996239	0.0984666	0.097957	0.0991806	0.100564	0.0996997	0.100138	0.0970968	0.100027	0.0997806	0.0997022	0.0985174	0.100564	0.0978133	0.0984666	0.0999467	0.0992843	0.100094	0.0991733	0.100239
YDL177C	0.0995658	0.103409	0.0980172	0.0989982	0.103432	0.104554	0.097714	0.102782	0.102782	0.0982135	0.0981797	0.0989764	0.0994034	0.0992085	0.100675	0.102782	0.102782	0.103832	0.0991454	0.0991002	0.0988836	0.0988836	0.0988836
YDL178W	0.0859507	0.0853554	0.0862953	0.0868113	0.0856045	0.0855548	0.085615	0.0856687	0.0866995	0.0861778	0.0849203	0.0865041	0.0859611	0.0859472	0.085732	0.0850422	0.0862953	0.0857651	0.0858651	0.0857035	0.0858615	0.0856687	0.085974
YDL179W	0.128364	0.126181	0.127055	0.126065	0.1264	0.126263	0.125411	0.127154	0.128454	0.125758	0.125565	0.126583	0.126863	0.126186	0.126412	0.127154	0.126065	0.126148	0.126304	0.126004	0.126065	0.126065	0.127182
YDL180W	0.0961141	0.0948044	0.0923565	0.0962713	0.0941339	0.0946901	0.0944488	0.0925926	0.0960005	0.094509	0.0934021	0.0946454	0.0949403	0.0952236	0.0939234	0.0944141	0.09506	0.0952081	0.0958572	0.0963368	0.0948811	0.0968427	0.0958152
YDL181W	0.0653453	0.0616631	0.0582178	0.0657671	0.0602718	0.059549	0.0624383	0.0616631	0.0595376	0.0655391	0.0595098	0.0601866	0.0624383	0.0638165	0.0615848	0.0577872	0.0596015	0.065241	0.0648883	0.0655391	0.0595761	0.0655391	0.0655391
YDL188C	0.0853175	0.0854434	0.0845091	0.0844486	0.0855379	0.0856181	0.0839254	0.0846561	0.0836889	0.0814319	0.0845214	0.0845301	0.0850676	0.0841662	0.084861	0.0855379	0.0852565	0.0855379	0.0851102	0.0857829	0.0842491	0.0849868	0.0847013
YDL190C	0.0921864	0.0927755	0.0929776	0.0939627	0.0919292	0.0922006	0.0923968	0.0918226	0.0917444	0.0919092	0.0920392	0.0931591	0.0930007	0.0934973	0.0922566	0.0921957	0.0915498	0.0939549	0.0939404	0.0938246	0.0939016	0.0939016	0.0938127
YDL192W	0.0238095	0.0238095	0.0242165	0.025641	0.025641	0.023976	0.0244898	0.0238095	0.024873	0.024668	0.0229955	0.0238967	0.0245421	0.02442	0.024568	0.025641	0.025641	0.0238095	0.0255522	0.025641	0.025641	0.025641	0.025641
YDL194W	0.105854	0.105625	0.104317	0.10622	0.106484	0.106196	0.104208	0.103654	0.106673	0.108501	0.103245	0.105483	0.105518	0.105353	0.105032	0.106264	0.106232	0.104056	0.105609	0.105518	0.105719	0.105518	0.105585
YDL195W	0.0908806	0.0914456	0.0886706	0.0914702	0.0915687	0.09136	0.0901721	0.092238	0.0916677	0.0911041	0.0893413	0.0905351	0.090724	0.0908603	0.0905413	0.0904108	0.090594	0.0897281	0.0910039	0.0909038	0.0910935	0.0909328	0.0909529
YDL197C	0.189651	0.190091	0.185228	0.190054	0.189217	0.185928	0.188554	0.190586	0.193697	0.189117	0.184901	0.188548	0.188536	0.188945	0.188406	0.188777	0.188534	0.186413	0.189306	0.189816	0.189473	0.188777	0.189844
YDL198C	0.0883369	0.0915958	0.089069	0.0883922	0.0896454	0.089701	0.0881391	0.0861774	0.0879278	0.0871464	0.087577	0.088445	0.0885399	0.0880846	0.0882468	0.0894996	0.0894996	0.0883922	0.0878096	0.0875924	0.0872848	0.0872848	0.0883922
YDL201W	0.0800707	0.0794154	0.077664	0.0790835	0.0797089	0.0790835	0.0787517	0.0814064	0.0802824	0.0784302	0.0774865	0.0795813	0.0794707	0.0794061	0.0789193	0.0767606	0.0802202	0.0779221	0.0790835	0.0792126	0.0790835	0.0790835	0.0791133
YDL203C	0.125158	0.124373	0.120165	0.1241	0.124405	0.123945	0.122333	0.122363	0.123657	0.123978	0.122077	0.123493	0.12391	0.123594	0.122861	0.12289	0.12445	0.120862	0.124398	0.124443	0.124554	0.124473	0.124418
YDL205C	0.0876524	0.0882041	0.0858288	0.0878049	0.0864499	0.0875277	0.0864692	0.0888211	0.0885589	0.0876143	0.0858994	0.087079	0.0868564	0.0866757	0.0867578	0.0867886	0.0867021	0.0872577	0.0868645	0.0868451	0.0867886	0.0867886	0.0871274
YDL206W	0.111108	0.111673	0.108274	0.11172	0.110159	0.110016	0.110235	0.11089	0.111213	0.111065	0.108656	0.111034	0.111021	0.111162	0.110679	0.108662	0.110233	0.109334	0.111492	0.111769	0.111855	0.112157	0.111462
YDL207W	0.101915	0.102792	0.100101	0.103263	0.1011	0.100788	0.100729	0.100677	0.105049	0.100601	0.10005	0.101578	0.101939	0.101491	0.101381	0.101898	0.100664	0.100207	0.102044	0.102	0.101898	0.101898	0.102854
YDL209C	0.124499	0.125829	0.124564	0.124402	0.122752	0.124845	0.123817	0.127326	0.125377	0.125864	0.123468	0.124727	0.124727	0.125268	0.124244	0.124402	0.123427	0.122603	0.125042	0.124889	0.125377	0.125377	0.124402
YDL210W	0.07678	0.0767301	0.074617	0.0756111	0.0765305	0.0759642	0.0755396	0.077188	0.0771316	0.0753304	0.0742176	0.0750512	0.0756062	0.0758606	0.0758341	0.074857	0.0760858	0.0753949	0.0764247	0.0765728	0.0768293	0.0766052	0.0754397
YDL212W	0.0995907	0.0984848	0.0985287	0.0996697	0.101168	0.10168	0.0990829	0.101249	0.103033	0.0999659	0.0990114	0.0998201	0.099775	0.100196	0.0997814	0.0996697	0.100476	0.0996697	0.0996874	0.0996697	0.0996697	0.0996697	0.0997912
YDL213C	0.0945093	0.0967849	0.093993	0.093993	0.0984934	0.0976133	0.0944144	0.0969429	0.093993	0.0939008	0.0945666	0.0939228	0.0940914	0.093993	0.0956914	0.0984178	0.0989199	0.0984178	0.0942077	0.0943208	0.093993	0.093993	0.0943334
YDL216C	0.121892	0.121752	0.120708	0.123569	0.122879	0.121556	0.121752	0.121968	0.123675	0.121992	0.119744	0.12258	0.122119	0.122094	0.121426	0.121212	0.120633	0.121212	0.122459	0.1218	0.122666	0.122724	0.122239
YDL217C	0.102644	0.103652	0.101407	0.100962	0.103879	0.100524	0.101374	0.099359	0.102719	0.103015	0.100828	0.100885	0.101175	0.101585	0.101512	0.102564	0.102735	0.10392	0.101763	0.102653	0.101948	0.100962	0.102975
YDL218W	0.10283	0.100854	NaN	0.102787	0.10079	0.101868	0.101408	0.100629	0.101981	NaN	0.100886	0.103374	0.102236	0.101153	0.101399	0.103774	0.100629	0.104177	0.102017	0.101677	0.103048	0.102725	0.10243
YDL220C	0.133732	0.134102	0.132536	0.133815	0.131865	0.13202	0.133308	0.132243	0.133548	0.134518	0.129997	0.133181	0.13379	0.132947	0.132467	0.132947	0.132249	0.13195	0.133772	0.133689	0.133569	0.134001	0.133695
YDL222C	0.0896874	0.0914988	0.0899439	0.0897436	0.0893327	0.0896465	0.0897741	0.0918803	0.0896402	0.0889757	0.088052	0.0911681	0.0896724	0.0897436	0.0897975	0.0886752	0.0886979	0.0897436	0.0899469	0.0896249	0.0903189	0.090812	0.0912229
YDL224C	0.0938495	0.094085	0.0939763	0.09423	0.095687	0.0946451	0.0944909	0.0947373	0.0941809	0.0942617	0.0938354	0.0942783	0.0940947	0.0942018	0.0944913	0.09423	0.0960111	0.0938007	0.0941978	0.0940609	0.0944641	0.09423	0.0938267
YDL225W	NaN	0.0941945	0.0931416	0.0943611	0.0966099	0.0945323	0.0938029	0.0935441	0.0945181	0.0941911	0.0934603	0.0942918	0.0945506	0.0944499	0.0947456	0.094148	0.0950474	0.094659	0.0942674	0.0943157	0.0943803	0.0935441	0.0949715
YDL226C	0.0970813	0.0980526	0.0967036	0.0980645	0.0986043	0.0962314	0.0986056	0.0971757	0.0981809	0.0992118	0.0964282	0.098165	0.098183	0.0977528	0.0977766	0.0971757	0.0975775	0.09812	0.0979157	0.0979102	0.09812	0.09812	0.0989674
YDL230W	0.0974427	0.0991434	0.0981592	0.0976178	0.0985619	0.0976231	0.097471	0.0984347	0.101155	0.0982177	0.0978285	0.0978679	0.0979056	0.0983796	0.0982143	0.0994268	0.0984136	0.0977479	0.0990751	0.0987654	0.0994268	0.0984347	0.0984347
YDL231C	0.0943398	0.0952064	0.0940275	0.094304	0.093778	0.0941251	0.0943035	0.0949082	0.0952978	0.0944882	0.0937109	0.0938918	0.0941681	0.094451	0.0941054	0.094405	0.0934757	0.0946281	0.0948245	0.0947306	0.095038	0.0948786	0.0952278
YDL232W	0.0630631	0.0633848	0.0630631	0.0630631	0.0635251	0.0630631	0.0630631	0.0630631	0.0630631	0.0630631	0.0630631	0.0630631	0.0630631	0.0630631	0.0632451	0.0630631	0.0630631	0.0630631	0.0630631	0.0640641	0.0630631	0.0630631	0.0630631
YDL233W	0.0941077	0.0928472	0.0905533	0.0906838	0.0933806	NaN	0.0921729	0.0941441	0.0984779	0.0929413	0.0900142	0.0913084	0.091917	0.0918847	0.0920189	0.0926916	0.0917182	0.0929557	0.0917513	0.0911988	0.0919654	0.0919654	0.091984
YDL234C	0.0848465	0.0849299	0.0838353	0.0842451	0.0852506	0.0846127	0.0841208	0.0850843	0.088557	0.0844236	0.0845259	0.0841373	0.0843061	0.0836912	0.0842895	0.0842196	0.0851119	0.0844524	0.0842632	0.0843637	0.0842196	0.0842196	0.0843615
YDL235C	0.0661706	0.0685232	0.0664683	0.0450514	0.0700549	0.0680014	0.0658163	0.0694444	0.0734127	0.0670883	0.0654762	0.0658541	0.067328	0.0669092	0.0672198	0.0694444	0.0694022	0.0657814	0.0671346	0.0672399	0.0674603	0.0674603	0.0654762
YDL236W	0.101586	0.101237	0.10252	0.101161	0.101406	0.101354	0.100309	0.102224	0.0991015	0.102557	0.101146	0.101819	0.101515	0.101338	0.100967	0.100097	0.100346	0.10157	0.102264	0.102402	0.102224	0.102224	0.102361
YDL237W	0.107374	0.108239	0.107654	0.106815	0.108248	0.106487	0.1069	0.105712	0.105794	0.106254	0.105037	0.107214	0.107246	0.10789	0.107296	0.106564	0.108233	0.107548	0.108358	0.107938	0.108597	0.108269	0.108379
YDL238C	0.106433	0.106162	0.105548	0.103439	0.103796	0.104915	0.103686	0.1034	0.104755	0.104171	0.105863	0.106098	0.106156	0.105104	0.104931	0.104067	0.104081	0.105092	0.106104	0.106067	0.106426	0.106733	0.106545
YDL240W	0.0928618	0.0927472	0.0919334	0.0805296	0.0914983	0.091177	0.0912527	0.0907007	0.0932252	0.0916421	0.0917785	0.0923067	0.0921633	0.0921014	0.0916235	0.0910282	0.09169	0.0904237	0.0923196	0.0927745	0.0923379	0.0923379	0.0926905
YDR003W	0.0864929	0.0851388	0.084957	0.0875383	0.0866448	0.0850208	0.0855404	0.0864139	0.0884676	0.0868878	0.0859663	0.0868878	0.0876251	0.0860102	0.0863932	0.0853081	0.0856106	0.0877385	0.0874891	0.0874144	0.0884676	0.0868878	0.0879815
YDR007W	0.113205	0.111385	0.111515	0.111911	0.110168	0.112593	0.111734	0.113131	0.114613	0.111418	0.110729	0.112567	0.112736	0.111485	0.11136	0.114613	0.1102	0.112448	0.113137	0.113131	0.113131	0.113131	0.112903
YDR017C	0.0976096	0.098658	0.0949823	0.097786	0.0973789	0.0973657	0.0975239	0.0965048	0.0976554	0.0972052	0.0954877	0.0972414	0.0974518	0.0984514	0.0967312	0.0968205	0.0966862	0.0958007	0.0974954	0.0975395	0.0979131	0.0974518	0.0968448
YDR020C	0.0831903	0.0800634	0.0809887	0.0815451	0.0787572	0.0802445	0.0809319	0.0801144	0.0805759	0.0789968	0.0798363	0.0816813	0.0809728	0.0810682	0.0799266	0.0801144	0.078623	0.0809948	0.0816839	0.0815451	0.0822053	0.0815451	0.0815451
YDR021W	0.0726174	0.072546	0.0724832	0.0726248	0.0728108	0.0731818	0.0721948	0.0734091	0.0735973	0.0735393	0.0726105	0.0727345	0.0729091	0.0729924	0.0728451	0.0730886	0.0739055	0.072704	0.0726255	0.0725758	0.0730245	0.0725758	0.0733877
YDR027C	0.10073	0.100976	0.09897	0.100958	0.100581	0.101107	0.100251	0.100187	0.104307	0.100737	0.0999532	0.100918	0.101031	0.100874	0.100414	0.100187	0.100562	0.10013	0.100922	0.101146	0.101138	0.100921	0.101032
YDR028C	0.104239	0.10508	0.10257	0.105245	0.104053	0.104261	0.103723	0.104321	0.106642	0.104495	0.103435	0.104468	0.104866	0.104394	0.104011	0.104321	0.104413	0.103566	0.104472	0.104612	0.104824	0.104648	0.104321
YDR030C	0.126777	0.128007	0.126767	0.128458	0.127911	0.128803	0.127063	0.128922	0.131404	0.12808	0.126831	0.127764	0.127827	0.127936	0.127076	0.127607	0.128181	0.126495	0.127657	0.127754	0.127607	0.127607	0.128433
YDR031W	0.0702434	0.0695213	0.0697273	0.0707899	0.0708599	0.0702931	0.0692286	0.0707899	0.0707899	0.0714068	0.0691581	0.07092	0.0713363	0.0712452	0.0699895	0.0680576	0.0707899	0.0699492	0.0708408	0.0700309	0.0707899	0.0707899	0.0707899
YDR032C	0.0659129	0.0648481	0.0635585	0.0663612	0.0677103	0.0660119	0.0656377	0.0678392	0.0695142	0.0666876	0.0644891	0.0653665	0.0668342	0.0665364	0.0656904	0.0661642	0.0678392	0.064618	0.0665392	0.0656989	0.0670661	0.0678392	0.0695572
YDR033W	0.0436562	0.0427068	0.0426697	0.012189	0.0424567	0.0420089	0.0420466	0.0416313	0.0416313	0.0440158	0.0428572	0.0427191	0.0428081	0.0421505	0.042334	0.0426697	0.0421836	0.0420307	0.0426852	0.0426697	0.0427496	0.0426697	0.0437347
YDR034C	0.0919034	0.091668	0.0921128	0.0842685	0.0925971	0.0929924	0.0908377	0.0917424	0.0933553	0.0930836	0.0923674	0.0934488	0.0929091	0.0930387	0.0917761	0.0913258	0.0925048	0.0915181	0.0928991	0.0928767	0.0929924	0.0929924	0.0930565
YDR036C	0.00390559	0.00429072	0.00274659	0.00388464	0.00488537	NaN	0.00365206	0.00516721	0.00510081	0.00325403	0.00341479	0.00344078	0.00392772	0.00392035	0.0045538	0.00591573	0.00416803	0.0043091	0.00410006	0.0040679	0.00446234	0.00410479	0.0037813
YDR041W	0.112745	0.112512	0.111111	0.113226	0.112829	0.113785	0.111438	0.112745	0.114063	0.111928	0.111996	0.112589	0.111874	0.112564	0.112465	0.112745	0.112676	0.112494	0.11269	0.112473	0.112745	0.112745	0.112348
YDR042C	0.14596	0.147272	0.144429	0.147746	0.148086	0.145786	0.146893	0.147746	0.14689	0.146658	0.145351	0.147746	0.146972	0.147378	0.14726	0.146088	0.149581	0.146598	0.147789	0.148575	0.148256	0.147746	0.146683
YDR043C	0.0970154	0.0977525	0.0963877	0.0977011	0.0976643	0.0977011	0.096798	0.0962644	0.0987671	0.0962725	0.0971823	0.0974959	0.0977969	0.0980204	0.0976576	0.0977011	0.0977317	0.0967065	0.0977226	0.097781	0.0977011	0.0977011	0.0993221
YDR044W	0.0695542	0.0715371	0.0696837	0.0685977	0.0709739	0.072672	0.0699667	0.0719352	0.0718044	0.0699088	0.0698525	0.0699088	0.0706518	0.0700214	0.0699805	0.070922	0.0709651	0.0688177	0.0699428	0.0699088	0.0699088	0.0699088	0.0699088
YDR045C	0.042042	0.0439725	0.042042	0.0402756	0.042042	0.041769	0.042042	0.042042	0.0421389	0.042042	0.042042	0.042042	0.042042	0.0425425	0.0421027	0.042042	0.042042	0.042042	0.042042	0.042042	0.042042	0.042042	0.04312
YDR047W	0.0835462	0.0853368	0.0840742	0.0848102	0.0828116	0.083062	0.0842284	0.0828116	0.0846185	0.0847629	0.0833472	0.0846481	0.0844645	0.0845461	0.0842493	0.0846481	0.0828311	0.0836592	0.084679	0.0846991	0.0846481	0.0855664	0.0847423
YDR049W	0.11912	0.117717	0.117461	0.120183	0.118428	0.118096	0.118125	0.118334	0.117303	0.117483	0.118123	0.119631	0.119836	0.118887	0.118244	0.118858	0.11888	0.118536	0.119951	0.119644	0.120591	0.119906	0.119812
YDR050C	0.0212598	0.0200131	0.0209974	0.0150533	0.0209974	0.0211167	0.0206974	0.019685	0.0227754	0.0213255	0.021125	0.0212473	0.0214348	0.0213619	0.0210769	0.0209974	0.0209974	0.0214012	0.0222558	0.0223097	0.0223097	0.0223097	0.0223097
YDR051C	0.0674927	0.066153	0.0660836	0.0302758	0.0671065	0.0657302	0.0674719	0.068999	0.0691558	0.0666606	0.0672579	0.068166	0.0682864	0.0682432	0.0672419	0.0670554	0.0671795	0.0684757	0.0689736	0.0687291	0.068999	0.068999	0.0691485
YDR052C	0.0949233	0.0927427	0.0923891	0.0745963	0.0931006	0.0937566	0.0937712	0.0930766	0.095565	0.0925507	0.0934597	0.0951915	0.0945727	0.0934662	0.0935772	0.0944792	0.0930866	0.0951984	0.0953424	0.0953882	0.0957738	0.0954142	0.0954142
YDR054C	0.0505389	0.0505389	0.0489854	0.0103363	0.0493343	0.0496238	0.0498039	0.0494204	0.0509359	0.0501195	0.0497156	0.0502726	0.0498678	0.0501661	0.0499853	0.0494204	0.0494204	0.0495064	0.0500089	0.0502282	0.0498506	0.0494204	0.0507397
YDR055W	0.0987946	0.099038	0.0976094	0.0966961	0.0983217	0.0989899	0.0984242	0.0979798	0.0995808	0.0978178	0.0976506	0.0984736	0.0981279	0.0986794	0.0981669	0.0979798	0.0992091	0.0983217	0.0981125	0.0980209	0.0982647	0.0979798	0.0987015
YDR056C	0.114784	0.113474	0.111953	0.111642	0.114325	0.114593	0.112806	0.113122	0.113629	0.113466	0.110825	0.111707	0.110219	0.110776	0.112038	0.113122	0.11474	0.111503	0.110519	0.110212	0.110032	0.110032	0.110032
YDR057W	0.126313	0.127667	0.123979	0.118628	0.127937	0.127153	0.126673	0.126553	0.125316	0.12483	0.125323	0.125897	0.126234	0.125654	0.126579	0.126553	0.12876	0.127107	0.127198	0.126653	0.127845	0.127752	0.126938
YDR058C	0.0940676	0.0927459	0.0921756	0.0958533	0.0921309	0.0926698	0.0939619	0.0908164	0.0933484	0.0909808	0.0926569	0.0953308	0.09469	0.093648	0.093307	0.0928552	0.0927901	0.0910517	0.0958752	0.0955168	0.0965406	0.0959133	0.0969326
YDR060W	0.103329	0.105733	0.102341	0.102303	0.105701	0.105563	0.103641	0.106031	0.104713	0.103931	0.103095	0.104438	0.103586	0.103618	0.104211	0.10571	0.105833	0.104695	0.103508	0.103565	0.103433	0.103457	0.103466
YDR061W	0.102319	0.102674	0.101297	0.101717	0.103017	0.102918	0.102241	0.103423	0.103164	0.102328	0.101091	0.102629	0.102024	0.101983	0.102201	0.102189	0.102701	0.103091	0.102605	0.102634	0.102284	0.103423	0.102078
YDR062W	0.0760676	0.0764489	0.0772374	0.0780476	0.0769383	0.0779683	0.0750212	0.0776987	0.0790763	0.0765681	0.0773198	0.0777552	0.0770265	0.0765784	0.0767162	0.0765125	0.0773075	0.0754797	0.0775593	0.0780941	0.0783831	0.0776987	0.078231
YDR063W	0.0904444	0.0913492	0.0917284	0.0954248	0.0935613	0.0925253	0.0903492	0.0911111	0.0911111	0.0959028	0.0922531	0.0938624	0.0915556	0.0930864	0.0926375	0.0955556	0.0933333	0.091453	0.0936401	0.0945679	0.0940171	0.0933333	0.0955556
YDR065W	0.137279	0.13912	0.138144	0.138813	0.138716	0.13893	0.137584	0.138599	0.138511	0.138087	0.138283	0.13912	0.138599	0.138296	0.138443	0.140421	0.13951	0.138459	0.138433	0.1387	0.138039	0.137688	0.138576
YDR067C	0.109246	0.112621	0.111081	0.111246	0.11117	0.11285	0.108241	0.112727	0.111963	0.111385	0.111246	0.111599	0.109962	0.110834	0.110887	0.114209	0.111529	0.11136	0.111058	0.111246	0.111246	0.111246	0.111208
YDR069C	0.0951623	0.0969968	0.0948929	0.0970692	0.0963297	0.097146	0.0958165	0.0966889	0.0954375	0.0951062	0.094828	0.0955258	0.0961142	0.0958707	0.0957092	0.0966889	0.0961998	0.0959428	0.096386	0.0962898	0.0963297	0.0963297	0.0963205
YDR070C	0.107092	0.110689	0.110717	0.106383	0.116749	0.118633	0.106586	0.109929	0.106726	0.106383	0.110274	0.108578	0.106619	0.106186	0.110144	0.109929	0.117021	0.109111	0.10682	0.106974	0.106383	0.106383	0.106383
YDR071C	0.0693576	0.0695685	0.0673225	0.0694444	0.0666845	0.0669192	0.0695437	0.0677083	0.0702845	0.0694444	0.0674431	0.0691964	0.0694444	0.0684799	0.0678136	0.0659722	0.0659722	0.0691773	0.0694185	0.0694444	0.0694444	0.0694444	0.0703793
YDR072C	0.0884398	0.087693	0.0878375	0.0887936	0.0871054	0.0875357	0.0881287	0.0869068	0.0891385	0.0864941	0.0857188	0.0887936	0.0885001	0.0883044	0.0873672	0.0869068	0.0886979	0.0872938	0.0893118	0.0893177	0.0898096	0.0894225	0.089487
YDR074W	0.0838316	0.0831813	0.0823658	0.0835365	0.0837983	0.0837134	0.0829557	0.0840174	0.0840534	0.0858523	0.0803375	0.0828318	0.0836954	0.0837078	0.0825385	0.0836458	0.0836854	0.0831027	0.0832728	0.0835013	0.083217	0.0832742	0.08336
YDR076W	0.102852	0.10542	0.103612	0.105029	0.107942	0.106145	0.10313	0.104162	0.104373	0.103548	0.102617	0.10446	0.103944	0.104472	0.104492	0.108257	0.108038	0.104855	0.104727	0.104799	0.10454	0.104981	0.104918
YDR078C	0.101019	0.101986	0.0993692	0.0992979	0.104725	0.103758	0.101289	0.100582	0.100066	0.0981714	0.100158	0.100513	0.0990296	0.100582	0.101553	0.103493	0.104949	0.0995745	0.0993385	0.0991266	0.0991266	0.0991266	0.0992759
YDR079W	0.0510417	0.0513393	0.0505952	0.0505952	0.0512218	0.0505952	0.0505952	0.0505952	0.0505952	0.0511533	0.0505952	0.0505952	0.0505952	0.0507606	0.0511063	0.0505952	0.052115	0.0505952	0.050651	0.0505952	0.0505952	0.0505952	0.0505952
YDR081C	0.101632	0.10114	0.100156	0.102642	0.102105	0.102105	0.102226	0.102456	0.103622	0.101425	0.100872	0.102373	0.102409	0.102476	0.101636	0.101404	0.101948	0.100513	0.102689	0.10271	0.102456	0.103158	0.102357
YDR082W	0.152293	0.15385	0.147542	0.152835	0.154189	0.154076	0.151301	0.153466	0.15061	0.152062	0.151193	0.152572	0.152483	0.152088	0.152016	0.153466	0.153552	0.149752	0.152738	0.153019	0.152641	0.152796	0.152796
YDR083W	0.0869921	0.0867013	0.0864832	0.0890177	0.0885188	0.0859742	0.0875494	0.0874161	0.0883546	0.0876441	0.0867753	0.0879533	0.0880099	0.0874821	0.0875935	0.0868224	0.0885368	0.0863005	0.0885602	0.0885659	0.0885188	0.089367	0.08841
YDR084C	0.101856	0.108999	0.0999579	0.104037	0.112743	0.110909	0.101987	0.112273	0.103778	0.102325	0.103731	0.105685	0.101606	0.103106	0.105289	0.112273	0.112131	0.103555	0.102391	0.102273	0.102273	0.102273	0.102315
YDR085C	0.146993	0.149491	0.146156	0.149308	0.149724	0.150638	0.146952	0.150443	0.148196	0.147663	0.145375	0.148657	0.1483	0.147972	0.147991	0.150979	0.149964	0.147145	0.149116	0.14952	0.149124	0.149372	0.14911
YDR086C	0.050823	0.0534979	0.0512117	0.0493827	0.0493827	0.0527497	0.0493827	0.0534979	0.0534979	0.0495113	0.0493827	0.0507545	0.0493827	0.0493827	0.0500894	0.0534979	0.0493827	0.0506489	0.0494288	0.0493827	0.0493827	0.0493827	0.0493827
YDR087C	0.0884703	0.0891226	0.0880898	0.0896454	0.0883971	0.088626	0.0888454	0.0890411	0.0891516	0.0863299	0.0879313	0.088878	0.0888889	0.0890411	0.088822	0.0878995	0.0878995	0.0879874	0.0890496	0.0890411	0.0890411	0.0890411	0.0890118
YDR088C	0.120474	0.122017	0.118588	0.121054	0.124111	0.122241	0.120557	0.124535	0.122991	0.120836	0.118298	0.12122	0.120126	0.120957	0.121186	0.121924	0.123572	0.120184	0.120288	0.120715	0.120184	0.120184	0.120362
YDR089W	0.111218	0.112871	0.110528	0.111785	0.113708	0.11225	0.111872	0.111762	0.113579	0.111272	0.110182	0.112146	0.11166	0.111656	0.112041	0.111379	0.113898	0.110908	0.112008	0.112231	0.112322	0.111762	0.111949
YDR090C	0.103728	0.103353	0.104323	0.103966	0.105285	0.104843	0.103751	0.102894	0.104208	0.102693	0.101867	0.103711	0.103966	0.104025	0.104041	0.103966	0.106201	0.102152	0.103998	0.104323	0.103966	0.105038	0.104818
YDR091C	0.0619048	0.0606928	0.0608405	0.0611642	0.0619609	0.0614072	0.0617327	0.0624521	0.0604393	0.0601943	0.0611066	0.0611228	0.0614304	0.0613878	0.0613187	0.0613574	0.0624521	0.0604732	0.0613942	0.0613574	0.0613574	0.0613574	0.0613715
YDR093W	0.0937966	0.0933395	0.0936083	0.0946505	0.0947161	0.0935782	0.0939045	0.0940086	0.093836	0.0938163	0.0919592	0.0945871	0.0941967	0.0932274	0.0936934	0.0935969	0.0947402	0.0933688	0.094521	0.0946766	0.0946738	0.0950175	0.0946421
YDR096W	0.10799	0.109063	0.106827	0.107832	0.109105	0.108639	0.107506	0.108639	0.107599	0.107967	0.108177	0.108728	0.107725	0.107527	0.108018	0.108268	0.109034	0.107213	0.108238	0.108454	0.108639	0.107527	0.108299
YDR097C	0.104038	0.104598	0.101518	0.104572	0.104027	0.103274	0.103777	0.102982	0.105236	0.102279	0.101788	0.10469	0.104106	0.10371	0.103222	0.104053	0.103979	0.103023	0.104556	0.104469	0.105	0.104588	0.105335
YDR100W	0.0769465	0.0783354	0.0765993	0.0765993	0.0768961	0.0768098	0.077393	0.0765993	0.0749566	0.0768887	0.0765993	0.0768198	0.0767536	0.0768565	0.0769033	0.0765993	0.0765993	0.0765993	0.0767462	0.0765993	0.0765993	0.0765993	0.0764806
YDR101C	0.0856622	0.0847924	0.0858524	0.0865089	0.0864903	0.0853535	0.0859468	0.0853535	0.0896437	0.085564	0.0856809	0.0867431	0.0861018	0.0864447	0.0862321	0.0859147	0.0869535	0.086001	0.0864131	0.0867565	0.0864759	0.0864759	0.0864759
YDR103W	0.134463	0.131298	0.1299	0.134219	0.131548	0.131765	0.132298	0.131539	0.134992	0.133594	0.130072	0.133577	0.13329	0.132873	0.131675	0.130829	0.132173	0.132738	0.133643	0.13371	0.133927	0.134024	0.133563
YDR104C	0.127716	0.127768	0.12613	0.12756	0.127886	0.1277	0.126993	0.127214	0.128801	0.126379	0.126563	0.126769	0.127357	0.126813	0.127112	0.127919	0.128323	0.128037	0.127477	0.127838	0.127996	0.128016	0.128016
YDR105C	0.0842807	0.0849825	0.0840078	0.0856842	0.0846316	0.0852376	0.0841805	0.0849825	0.0850051	0.0847108	0.0844172	0.0854169	0.0849357	0.0846316	0.0845678	0.0842807	0.0849825	0.0846046	0.0850296	0.0847875	0.0856842	0.0849825	0.0843347
YDR110W	0.102295	0.103532	0.101551	0.102207	0.103558	0.104892	0.102634	0.103781	0.106367	0.102327	0.102101	0.102701	0.102657	0.102553	0.102915	0.104945	0.103781	0.101544	0.102613	0.102779	0.102036	0.102618	0.102737
YDR111C	0.106083	0.107923	0.104907	0.107236	0.106657	0.105822	0.106304	0.106001	0.105222	0.106055	0.10523	0.107097	0.106586	0.10673	0.106344	0.106657	0.105987	0.105496	0.107174	0.107423	0.106001	0.107313	0.107448
YDR116C	0.103263	0.101565	0.102953	0.104895	0.103999	0.10214	0.103497	0.10373	0.103579	0.103329	0.103519	0.104618	0.104584	0.104053	0.10392	0.10373	0.104201	0.103281	0.104773	0.104895	0.104895	0.106061	0.104925
YDR117C	0.122218	0.120762	0.118614	0.121194	0.119992	0.122055	0.121127	0.121194	0.122011	0.121707	0.117563	0.121867	0.121273	0.120514	0.120221	0.120606	0.119251	0.122145	0.12127	0.121227	0.121194	0.121783	0.12139
YDR118W	0.13044	0.128722	0.126874	0.130783	0.128357	0.127152	0.129739	0.125203	0.127261	0.128564	0.127504	0.130705	0.129466	0.129266	0.128394	0.128266	0.128331	0.128844	0.130512	0.130859	0.130633	0.130122	0.13185
YDR120C	0.0988723	0.0967165	0.0949188	0.0996844	0.096276	0.0970652	0.0977172	0.0967999	0.0976285	0.0979127	0.0946188	0.0991072	0.0983566	0.0980971	0.0968117	0.0967999	0.096303	0.0988206	0.0994905	0.0996214	0.0996738	0.100303	0.100048
YDR121W	0.115188	0.118557	0.118486	0.115786	0.121599	0.119882	0.11527	0.120473	0.115595	0.116459	0.117786	0.11575	0.115595	0.115956	0.11842	0.115595	0.120473	0.116471	0.115728	0.115595	0.115595	0.115595	0.116512
YDR122W	0.105355	0.104636	0.101041	0.104905	0.105219	0.104635	0.104036	0.10429	0.106008	0.104518	0.103283	0.104492	0.10451	0.10405	0.104045	0.103426	0.10448	0.104526	0.104688	0.104823	0.105266	0.104653	0.105439
YDR123C	0.115181	0.114619	0.112303	0.114918	0.114349	0.115648	0.113917	0.114853	0.116087	0.115024	0.112971	0.114905	0.114853	0.114671	0.113937	0.113761	0.113435	0.112836	0.115	0.115582	0.114853	0.114853	0.115946
YDR126W	0.110462	0.108039	0.108204	0.109581	0.110613	0.108443	0.109042	0.110512	0.108023	0.109523	0.107668	0.109664	0.109654	0.109358	0.109183	0.109523	0.110554	0.109675	0.109703	0.110017	0.110512	0.109523	0.109573
YDR127W	0.0836403	0.0839951	0.0836049	0.0834694	0.0844084	0.0842663	0.0832987	0.0842663	0.0836373	0.0840995	0.0833626	0.0841686	0.083719	0.0836734	0.0837729	0.0852926	0.0842794	0.0831295	0.0839148	0.0838102	0.0838558	0.0838558	0.0833874
YDR128W	0.097873	0.09699	0.095586	0.0973039	0.0979348	0.096764	0.0965033	0.0980035	0.097338	0.0975774	0.0955537	0.0976167	0.0971719	0.0971977	0.0970064	0.0974233	0.0977258	0.0956827	0.0972891	0.0975361	0.0980035	0.0971332	0.098063
YDR130C	0.117284	0.116843	0.115039	0.119033	0.115716	0.114886	0.116402	0.1156	0.12009	0.118126	0.11412	0.11683	0.117247	0.117097	0.11602	0.114478	0.116174	0.11655	0.117941	0.117783	0.117845	0.117845	0.117874
YDR131C	0.131722	0.132591	0.129792	0.133375	0.132386	0.13192	0.130571	0.131224	0.132376	0.130069	0.127223	0.131701	0.131988	0.132226	0.131231	0.132991	0.132941	0.131553	0.133196	0.132934	0.133098	0.133098	0.134261
YDR132C	0.114852	0.116911	0.114621	0.116263	0.116325	0.116141	0.115534	0.116263	0.118865	0.115465	0.114686	0.117031	0.116084	0.116077	0.115907	0.116263	0.116349	0.115281	0.116301	0.116338	0.116212	0.116263	0.116334
YDR135C	0.103698	0.104451	0.102444	0.103171	0.103449	0.103074	0.103054	0.104373	0.103196	0.102828	0.102178	0.103504	0.102908	0.103408	0.103145	0.103933	0.103709	0.102327	0.103133	0.103237	0.103257	0.103274	0.103657
YDR137W	0.114768	0.116661	0.113899	0.115873	0.115023	0.115462	0.115098	0.115873	0.11733	0.116021	0.114339	0.115983	0.115873	0.115789	0.115317	0.115873	0.114527	0.115718	0.116203	0.116458	0.116375	0.116375	0.11622
YDR138W	0.143025	0.143215	0.142178	0.143019	0.142892	0.142995	0.14275	0.14203	0.145981	0.142238	0.142141	0.142957	0.143003	0.142964	0.142852	0.14203	0.142701	0.141792	0.143167	0.143185	0.143799	0.142915	0.143322
YDR140W	0.104077	0.102749	0.101653	0.104267	0.102417	0.101964	0.102473	0.101574	0.10485	0.102065	0.101792	0.102527	0.102623	0.102925	0.102499	0.101574	0.103583	0.101794	0.103645	0.104753	0.103004	0.105866	0.103188
YDR141C	0.097198	0.0975778	0.0968514	0.0969533	0.0975708	0.0974192	0.0972419	0.0970803	0.0977448	0.0971171	0.0967315	0.0972298	0.0970934	0.0970585	0.0972004	0.0972765	0.0971679	0.0969595	0.0968607	0.0970803	0.0968841	0.0970803	0.0970853
YDR142C	0.0980186	0.0982839	0.098947	0.0977508	0.0990377	0.0993489	0.0984418	0.098947	0.0998312	0.0974826	0.0980997	0.0988207	0.097886	0.0986032	0.0985809	0.0998312	0.0989658	0.0983349	0.098109	0.0980629	0.0980629	0.0980629	0.0986296
YDR146C	0.125116	0.12421	0.125473	0.125681	0.124336	0.123979	0.123994	0.124702	0.12627	0.122716	0.123932	0.125547	0.124994	0.124276	0.124374	0.122872	0.124415	0.125213	0.125476	0.125213	0.125213	0.125213	0.125297
YDR147W	0.131348	0.13264	0.131689	0.133001	0.132324	0.132477	0.131706	0.131689	0.131709	0.13103	0.131465	0.131718	0.132391	0.132308	0.131889	0.131689	0.132321	0.131689	0.132223	0.132962	0.132308	0.131689	0.133309
YDR151C	0.129441	0.132093	0.129553	0.133967	0.129767	0.12965	0.130396	0.129741	0.130739	0.129741	0.130808	0.132307	0.130805	0.131071	0.130036	0.129741	0.129741	0.131429	0.131766	0.131903	0.132735	0.131737	0.131685
YDR152W	0.0862199	0.0859679	0.0854223	0.0856331	0.0861943	0.0859323	0.0854899	0.0854899	0.0842734	0.0863263	0.0849661	0.0858955	0.0858143	0.0858955	0.0854654	0.0867065	0.0855676	0.0854899	0.0858939	0.0861658	0.0854899	0.0854899	0.0847101
YDR153C	0.0929329	0.0957935	0.0933193	0.0942989	0.0960761	0.0948332	0.0945031	0.0950512	0.0969852	0.094152	0.0941408	0.0939093	0.0935591	0.0938966	0.0947686	0.09665	0.0962418	0.0938214	0.0935778	0.0936746	0.0934525	0.0934525	0.0951127
YDR155C	0.0438446	0.0438358	0.0436492	0.0437628	0.0447591	0.0437628	0.0438212	0.0437628	0.047457	0.0438267	0.0437912	0.0437628	0.0437628	0.0437628	0.0439487	0.0437628	0.0439368	0.0437628	0.0437552	0.0438764	0.0437628	0.0437628	0.0438152
YDR158W	0.0827662	0.0829874	0.0810611	0.0826296	0.08319	0.0802285	0.0824214	0.0835403	0.0823064	0.0827719	0.0806816	0.0830633	0.0826296	0.0825284	0.0825008	0.0817188	0.083114	0.0832601	0.0826568	0.0826296	0.0826296	0.0826296	0.0828865
YDR159W	0.13979	0.138531	0.137716	0.139649	0.139255	0.138604	0.138703	0.138558	0.140254	0.139153	0.137587	0.139514	0.139422	0.139122	0.138779	0.138304	0.139261	0.139496	0.13968	0.139715	0.139574	0.139828	0.139672
YDR160W	0.0986934	0.0974783	0.0950406	0.0983561	0.0984189	0.096921	0.097066	0.0974701	0.0981878	0.0970448	0.0945628	0.0986569	0.0980308	0.0978864	0.0973689	0.0971643	0.0981366	0.0984875	0.0984309	0.0983111	0.0990756	0.0986934	0.0984777
YDR161W	0.10232	0.105339	0.103102	0.102198	0.106025	0.104335	0.102123	0.104725	0.105446	0.102873	0.102374	0.102311	0.102262	0.102816	0.10351	0.103866	0.105584	0.103337	0.10226	0.102195	0.102148	0.102148	0.102346
YDR163W	0.166796	0.160911	0.159799	0.162534	0.161175	0.160985	0.162156	0.162913	0.16064	0.1636	0.159325	0.163076	0.163545	0.163061	0.162018	0.16064	0.161084	0.160495	0.163771	0.163902	0.164428	0.164428	0.163651
YDR164C	0.0932072	0.0932063	0.0931352	0.0935583	0.0940653	0.0944152	0.0931964	0.0932883	0.0928884	0.0928435	0.093199	0.0933757	0.093227	0.0933393	0.0935758	0.0932883	0.0937376	0.0935002	0.0933191	0.0935943	0.0942065	0.0932883	0.0933353
YDR165W	0.128727	0.1282	0.126602	0.126799	0.127414	0.127517	0.127997	0.126974	0.130126	0.126383	0.126633	0.127294	0.127472	0.127513	0.127321	0.12772	0.12818	0.126917	0.127578	0.127389	0.12772	0.12772	0.127877
YDR167W	0.0877324	0.088342	0.0865336	0.0872493	0.0893681	0.0872493	0.0871113	0.0872493	0.0872493	0.0872493	0.0863994	0.087326	0.087142	0.0878755	0.0874445	0.0872493	0.0896819	0.0872493	0.0872914	0.0872493	0.0872493	0.0888596	0.0872493
YDR168W	0.0952439	0.097917	0.0950132	0.096225	0.0965979	0.0964079	0.09594	0.0974239	0.0974876	0.0955576	0.095899	0.0962342	0.0961528	0.0964743	0.0961887	0.0963113	0.0966826	0.0969688	0.0961962	0.0963282	0.096109	0.096109	0.0962439
YDR169C	0.109557	0.107625	0.108425	0.107684	0.107151	0.108124	0.106768	0.107417	0.112061	0.108264	0.107993	0.107818	0.107633	0.108566	0.10754	0.107417	0.106768	0.108065	0.10828	0.108966	0.108065	0.108065	0.10873
YDR170C	0.0939414	0.0939661	0.093396	0.0944465	0.0936334	NaN	0.0934753	0.0943781	0.0938094	0.0937485	0.0933573	0.0941301	0.0942889	0.0940675	0.0938872	0.0939003	0.0942558	0.0939922	0.0942209	0.0942701	0.0944087	0.0941989	0.094274
YDR171W	0.127617	0.126272	0.124401	0.126209	0.126773	0.12477	0.126209	0.127089	0.126266	0.12533	0.124585	0.126126	0.125623	0.126307	0.125996	0.12533	0.127482	0.125803	0.126295	0.126209	0.126209	0.126209	0.126277
YDR174W	0.0579906	0.0618172	0.0584683	0.0593328	0.0583552	0.0604858	0.0583213	0.0596441	0.0585347	0.0615455	0.0585785	0.0583843	0.0582331	0.0590562	0.058642	0.0596441	0.0583213	0.0585248	0.0583411	0.0584683	0.0583213	0.0583213	0.0595762
YDR175C	0.11563	0.115519	0.114483	0.115114	0.117257	0.114739	0.114878	0.116146	0.116213	0.115049	0.114655	0.115016	0.11477	0.115458	0.115239	0.115114	0.116212	0.11432	0.115215	0.115343	0.115114	0.115114	0.115035
YDR176W	0.0947304	0.0953197	0.0937109	0.09703	0.0953766	0.0959524	0.0958514	0.0946593	0.0950263	0.0956224	0.0943827	0.0967817	0.096303	0.0962925	0.0954974	0.0956076	0.0957725	0.0950605	0.0965081	0.0965559	0.0965559	0.0965559	0.0972975
YDR177W	0.0753858	0.0769951	0.0719307	0.0770697	0.0753799	0.0750561	0.0751764	0.0771605	0.0756173	0.0774981	0.0732382	0.0757643	0.075823	0.0765604	0.0758511	0.0787037	0.0726294	0.0759734	0.0765213	0.0764746	0.0770418	0.0756173	0.0756173
YDR179C	0.108793	0.110429	0.108384	0.108384	0.110901	0.110429	0.108501	0.108384	0.112211	0.108896	0.10918	0.108482	0.108521	0.108953	0.10919	0.110429	0.112474	0.109328	0.108888	0.109634	0.110429	0.108384	0.108384
YDR180W	0.121024	0.120417	0.119549	0.121189	0.120556	0.120746	0.120511	0.120218	0.123435	0.120448	0.119698	0.121132	0.120733	0.120741	0.120525	0.120218	0.120636	0.119789	0.120894	0.120888	0.120983	0.120664	0.120899
YDR182W	0.116498	0.11897	0.115987	0.116024	0.118018	0.117868	0.116585	0.118053	0.117115	0.117144	0.116109	0.116507	0.116024	0.116513	0.116776	0.117377	0.117463	0.116128	0.11612	0.11625	0.116024	0.1167	0.116683
YDR183W	0.12215	0.123748	0.121789	0.121068	0.124657	0.121986	0.121975	0.122511	0.125676	0.121744	0.121208	0.121068	0.121068	0.121148	0.121767	0.122511	0.123985	0.121401	0.120933	0.121148	0.121068	0.121068	0.120994
YDR184C	0.0960718	0.0922719	0.0904103	0.0920314	0.0909666	0.0913172	0.0909732	0.0909091	0.0909091	0.092312	0.0912676	0.0918176	0.091358	0.0918444	0.0912719	0.0909091	0.0908613	0.0913408	0.0920859	0.0920314	0.0920314	0.0920314	0.0909091
YDR185C	0.0837963	0.0840608	0.082716	0.0818083	0.0823362	0.083165	0.0817989	0.0851852	0.0814217	0.081713	0.0815844	0.0819224	0.0814815	0.0817901	0.0824916	0.0833333	0.0817967	0.0824786	0.0820757	0.0823045	0.0814815	0.0814815	0.0814815
YDR188W	0.0904543	0.0910441	0.0897309	0.0921952	0.0910524	0.0911283	0.0918234	0.0912379	0.0912962	0.0917653	0.0897477	0.0912092	0.0913182	0.0914723	0.0908056	0.0912379	0.0912635	0.0909597	0.0921848	0.0924434	0.0924434	0.0924434	0.0928298
YDR189W	0.0944671	0.091524	0.0896143	0.0949205	0.0915212	0.0924538	0.0939193	0.0913634	0.0963609	0.0941901	0.090121	0.0930768	0.0947617	0.0948894	0.0922064	0.0918632	0.091087	0.0909021	0.0948001	0.0948617	0.0953614	0.0948617	0.0954767
YDR190C	0.0752514	0.0753079	0.0743614	0.0759297	0.0763263	0.0761102	0.0753695	0.0764368	0.0757184	0.0757857	0.074541	0.075821	0.0757184	0.0755987	0.0754572	0.075	0.0771857	0.0747237	0.0757613	0.0761973	0.0757184	0.0757184	0.0778367
YDR194C	0.102306	0.0998462	0.098688	0.102131	0.0997858	0.100404	0.100032	0.099632	0.104017	0.102646	0.0997847	0.101845	0.102031	0.102631	0.10043	0.0991323	0.100993	0.0990169	0.102923	0.103519	0.10463	0.10313	0.102618
YDR195W	0.0914189	0.0920864	0.0918502	0.0907958	0.0925372	0.0931747	0.0905822	0.093288	0.0920218	0.0904742	0.0899218	0.0907365	0.0912527	0.0912804	0.0911419	0.092665	0.0926782	0.0916106	0.0911957	0.0912112	0.0920419	0.0907958	0.0908118
YDR196C	0.0964912	0.0970696	0.0958165	0.0970072	0.0970622	0.0960618	0.0955851	0.0985155	0.0959035	0.0972925	0.0948418	0.0966519	0.0964462	0.097091	0.0963072	0.0958165	0.0966779	0.0961279	0.0975537	0.0980657	0.0985155	0.0985155	0.0972006
YDR198C	0.122292	0.12433	0.12064	0.122917	0.122739	0.123674	0.121925	0.125	0.122312	0.122895	0.121046	0.12209	0.122685	0.122531	0.122222	0.124306	0.122222	0.122169	0.123018	0.123225	0.124306	0.122917	0.12297
YDR200C	0.11162	0.110756	0.108589	0.111075	0.111279	0.11117	0.111056	0.111486	0.113671	0.111587	0.110164	0.11146	0.111307	0.110948	0.110709	0.110411	0.110944	0.109583	0.11169	0.111665	0.111486	0.111486	0.1115
YDR201W	0.104653	0.10485	0.103481	0.108302	0.106026	0.107764	0.105822	0.104357	0.108302	0.105097	0.102522	0.106611	0.106461	0.104905	0.104975	0.104357	0.104357	0.10284	0.106503	0.105015	0.108302	0.108302	0.108302
YDR202C	0.102756	0.103234	0.101535	0.101978	0.102368	0.101928	0.101434	0.10121	0.104614	0.102785	0.101646	0.102796	0.102836	0.102102	0.102141	0.1037	0.102796	0.102181	0.102514	0.102179	0.101811	0.102756	0.101811
YDR204W	0.102954	0.105017	0.104277	0.104167	0.104828	0.103445	0.10428	0.104167	0.103847	0.105376	0.103712	0.104592	0.10463	0.104552	0.104387	0.105159	0.105159	0.104396	0.104792	0.104993	0.105159	0.105159	0.104192
YDR205W	0.123895	0.123335	0.1231	0.123664	0.125165	0.124193	0.123296	0.124897	0.128202	0.124171	0.122778	0.123747	0.123773	0.1231	0.123898	0.124616	0.125381	0.122374	0.123556	0.123556	0.12353	0.12353	0.123986
YDR206W	0.130295	0.13157	0.130921	0.131269	0.132312	0.132304	0.13088	0.130901	0.133426	0.130361	0.129786	0.131374	0.130289	0.130819	0.130855	0.131636	0.132942	0.130279	0.130694	0.13086	0.131269	0.130901	0.130411
YDR208W	0.0870227	0.0865517	0.086915	0.0886119	0.085473	0.0857197	0.0874567	0.0856439	0.0857246	0.0878833	0.0849	0.087574	0.08725	0.0870728	0.0862599	0.0852273	0.0857237	0.0865734	0.087565	0.0873611	0.0881119	0.0882197	0.0877059
YDR211W	0.0855434	0.0856724	0.0852966	0.086114	0.084947	0.0852565	0.0858806	0.084959	0.0864671	0.0863177	0.0846019	0.0857827	0.085707	0.0856862	0.0852123	0.0854265	0.0859437	0.0855344	0.0858521	0.0856343	0.085894	0.0863615	0.0859539
YDR212W	0.0672213	0.0670725	0.0675355	0.0671951	0.0673701	0.0675325	0.0673701	0.0655844	0.0670821	0.0678166	0.0654108	0.0677386	0.0670527	0.0672048	0.0667809	0.0667749	0.0675854	0.0669123	0.0673524	0.067767	0.0673701	0.0673701	0.0685606
YDR213W	0.0931393	0.0939064	0.0937855	0.0940131	0.0941854	0.0938734	0.0937821	0.0935437	0.0934969	0.093011	0.0929543	0.0938891	0.0930515	0.0936646	0.0935877	0.093181	0.0938833	0.0936274	0.0940215	0.0940878	0.0942412	0.0946318	0.0950411
YDR214W	0.108452	0.11318	0.108368	0.108318	0.112286	0.11232	0.108751	0.110161	0.110682	0.108714	0.108974	0.10894	0.108515	0.109106	0.110363	0.110161	0.112606	0.109358	0.108397	0.109001	0.109139	0.108262	0.108311
YDR216W	0.118753	0.120662	0.118077	0.118193	0.120279	0.120425	0.118133	NaN	0.119207	0.118557	0.116995	0.118224	0.117837	0.118105	0.118398	NaN	0.120504	0.118719	0.118314	0.118382	0.118604	0.118354	0.118968
YDR217C	0.14472	0.145304	0.143353	0.144273	0.143544	0.144416	0.144008	0.144878	0.144412	0.143247	0.142705	0.143818	0.144196	0.143982	0.143659	0.144853	0.143901	0.14458	0.144069	0.144179	0.143842	0.144094	0.144179
YDR219C	0.121144	0.121767	0.120226	0.121537	0.121647	0.123553	0.121353	0.119391	0.122345	0.122498	0.1196	0.121912	0.121537	0.121498	0.121003	0.120822	0.119483	0.121427	0.121561	0.121656	0.121537	0.121537	0.121904
YDR221W	0.144011	0.144701	0.141687	0.143584	0.142976	0.143842	0.143353	0.144058	0.14467	0.143228	0.140614	0.143448	0.143268	0.14174	0.142808	0.144058	0.142898	0.143256	0.143573	0.143478	0.142161	0.144058	0.14407
YDR222W	0.0973084	0.0969421	0.095648	0.097405	0.0980347	0.0967366	0.097669	0.0962267	0.0966144	0.0971281	0.0961488	0.0969898	0.0972951	0.0962267	0.0969053	0.0962267	0.0979315	0.0956103	0.0971894	0.0972506	0.097028	0.0978293	0.0968431
YDR225W	0.035213	0.0350877	0.0359231	0.0331712	0.0350235	0.0350877	0.0352309	0.037594	0.0374323	0.0350877	0.0351921	0.0353264	0.0352548	0.0353662	0.0354168	0.037594	0.0350877	0.0350877	0.0350597	0.0350877	0.0350877	0.0350877	0.0349592
YDR226W	0.0720478	0.0723361	0.0726623	0.071573	0.0751983	0.0727001	0.0720051	0.0717489	0.0706399	0.0729634	0.0718527	0.0720336	0.0724464	0.0724132	0.0725189	0.0732436	0.0732436	0.0719788	0.0722453	0.0718319	0.0717489	0.0717489	0.0718255
YDR229W	0.102734	0.103216	0.103974	0.104668	0.104813	0.101153	0.104475	0.103164	0.104614	0.104404	0.101682	0.104334	0.104074	0.103915	0.10369	0.103896	0.104466	0.103368	0.104417	0.104496	0.104496	0.104496	0.104496
YDR231C	0.0874595	0.0885344	0.0892665	0.0914715	0.0874201	0.0863489	0.0882571	0.0857605	0.0869611	0.0887945	0.0844121	0.0886115	0.087918	0.085311	0.0867085	0.0889968	0.0873786	0.0875031	0.0889907	0.0893563	0.092233	0.0889968	0.0896606
YDR233C	0.0742123	0.0759547	0.0741633	0.0749785	0.0757576	0.07646	0.075726	0.0779651	0.0722586	0.0746883	0.0741173	0.0749692	0.0754699	0.073734	0.0753183	0.0768613	0.0753818	0.0759274	0.0751892	0.0749604	0.0768613	0.0757576	0.074484
YDR234W	0.0840647	0.0841848	0.0829307	0.0837327	0.0833104	0.0830495	0.083183	0.0818793	0.0866173	0.0835094	0.0833643	0.083613	0.0834483	0.0829573	0.0832727	0.0832242	0.0829278	0.0837045	0.0836615	0.0836778	0.0841848	0.0837045	0.0836798
YDR236C	0.112412	0.113542	0.111296	0.113862	0.11473	0.114709	0.112542	0.113325	0.113963	0.115894	0.111232	0.113905	0.114035	0.112649	0.112956	0.114847	0.116434	0.113325	0.113308	0.113325	0.113325	0.113325	0.116213
YDR237W	0.0933706	0.094045	0.0925926	0.0946019	0.0939773	0.0935981	0.0935656	0.0924604	0.0947725	0.0937048	0.0927607	0.0939773	0.0942048	0.0932189	0.0935521	0.0935981	0.0939854	0.0943857	0.0949905	0.094799	0.0935981	0.0947358	0.0936564
YDR238C	0.0752396	0.0735724	0.0728839	0.0746185	0.0733402	0.0729513	0.0743718	0.0748802	0.0738756	0.074923	0.0726367	0.0740002	0.0744467	0.0732261	0.0733073	0.0728268	0.072805	0.0741168	0.0746721	0.0746711	0.0741958	0.0748802	0.0752839
YDR239C	0.13869	0.138735	0.138644	0.137931	0.139298	0.137858	0.138833	0.139939	0.138247	0.139523	0.136951	0.138452	0.13833	0.138159	0.138198	0.13869	0.139629	0.138178	0.13851	0.138644	0.139523	0.13869	0.139298
YDR240C	0.1262	0.127317	0.127188	0.126954	0.12557	0.125945	0.125838	0.125085	0.127135	0.126669	0.12484	0.126179	0.126031	0.125347	0.125391	0.126437	0.12589	0.126437	0.1265	0.126549	0.126437	0.126437	0.126523
YDR242W	0.0945455	0.0928146	0.0933862	0.0952381	0.0949176	0.0930736	0.0938435	0.0934524	0.0949309	0.093936	0.0928323	0.0944161	0.0952381	0.0928241	0.0933188	0.0940476	0.0948328	0.0934524	0.0951781	0.0952381	0.0958333	0.0958333	0.0952534
YDR243C	0.136379	0.1372	0.136021	0.136725	0.137015	0.137315	0.136314	0.134794	0.135505	0.137076	0.134857	0.136411	0.136605	0.135549	0.136169	0.135926	0.137046	0.136666	0.136431	0.136555	0.136492	0.136492	0.13655
YDR244W	0.11591	0.116892	0.115189	0.117068	0.115739	0.116368	0.115787	0.116812	0.116304	0.11666	0.114911	0.116787	0.117248	0.116285	0.116057	0.118048	0.115193	0.117356	0.117297	0.117219	0.117356	0.117356	0.116952
YDR245W	0.0905438	0.0899092	0.0894862	0.0901581	0.0905166	0.0899862	0.0894741	0.0882172	0.0888722	0.0893805	0.089075	0.0901107	0.0901913	0.0896272	0.0895332	0.0891283	0.0894952	0.0908203	0.0905785	0.0903793	0.0899092	0.0899092	0.0899092
YDR246W	0.0933505	0.096878	0.0947981	0.092139	0.0956627	0.0960699	0.0937976	0.0977901	0.0919677	0.0920587	0.0935244	0.0927995	0.09255	0.0936962	0.0940997	0.0977901	0.0963036	0.0937592	0.0920383	0.0922912	0.0919677	0.0919677	0.0920424
YDR249C	0.136011	0.139665	0.135679	0.133371	0.137843	0.137417	0.137762	0.139443	0.135964	0.137744	0.13636	0.136302	0.136115	0.137066	0.137246	0.136769	0.140125	0.136769	0.135881	0.135927	0.135877	0.135877	0.135626
YDR251W	0.115198	0.114681	0.113779	0.110673	0.115442	0.113771	0.114232	0.113735	0.116146	0.116046	0.112752	0.115147	0.115413	0.114055	0.114319	0.114921	0.115123	0.114283	0.115857	0.116108	0.115712	0.116108	0.115256
YDR252W	0.119889	0.123492	0.118765	0.12	0.12	0.122626	0.120444	0.122222	0.120573	0.120717	0.12	0.120317	0.120296	0.120741	0.121392	0.12	0.12	0.121197	0.12	0.12	0.12	0.12	0.120057
YDR253C	0.0801847	0.0794158	0.0794227	0.0793319	0.0794079	0.0793876	0.0794282	0.082702	0.0792298	0.0799351	0.0801943	0.0797258	0.0792298	0.0801943	0.0797734	0.0792298	0.0794514	0.0792298	0.0793723	0.0793262	0.0792298	0.0792298	0.0802537
YDR254W	0.111573	0.119199	0.11234	0.112385	0.115502	0.116063	0.112092	0.115931	0.111597	0.112186	0.114125	0.112749	0.112493	0.113873	0.115072	0.115931	0.115529	0.114199	0.112438	0.112582	0.112299	0.113026	0.111666
YDR263C	0.119095	0.11801	0.117922	0.108428	0.117446	0.118369	0.118331	0.116566	0.117403	0.119132	0.117011	0.118564	0.118295	0.117837	0.117819	0.118854	0.118481	0.118326	0.118829	0.11877	0.118854	0.118854	0.119226
YDR264C	0.0929727	0.0920209	0.0908652	0.0892426	0.091418	0.0914615	0.0920736	0.0911064	0.0943126	0.093697	0.0907206	0.0929252	0.0930161	0.0920709	0.0917947	0.0911064	0.0913557	0.0927089	0.0934207	0.093373	0.0937105	0.0937105	0.0937105
YDR265W	0.125036	0.126649	0.123737	0.127789	0.126987	0.126233	0.125001	0.12686	0.125874	0.126706	0.124285	0.126954	0.126137	0.125929	0.126218	0.123902	0.127196	0.126709	0.126912	0.126751	0.12686	0.12686	0.126886
YDR266C	0.0971777	0.0971257	0.0957758	0.0971744	0.0982185	0.0972138	0.0960391	0.0974803	0.097128	0.097464	0.0965269	0.0967621	0.0963709	0.0964822	0.0969072	0.0985203	0.0978454	0.0973275	0.0964887	0.0964402	0.0969602	0.0964402	0.0966269
YDR267C	0.0794562	0.0791253	0.0778785	0.0793792	0.0807963	0.0792822	0.0783197	0.0795569	0.0817334	0.0785184	0.0777946	0.0796528	0.0790869	0.0784939	0.0790178	0.0795569	0.080264	0.0797118	0.0795982	0.0796688	0.0795569	0.0795569	0.0795569
YDR268W	0.0954107	0.0939508	0.0930179	0.0963317	0.0959944	0.0948963	0.0951037	0.0945774	0.092823	0.0947471	0.0935296	0.0960811	0.0958054	0.0952109	0.0949761	0.0937002	0.0961451	0.095657	0.0963056	0.0962343	0.0963317	0.0963317	0.0963317
YDR270W	0.11605	0.115875	0.113861	0.115465	0.116054	0.115574	0.115017	0.115875	0.117758	0.114683	0.114267	0.115433	0.114858	0.114438	0.115087	0.11687	0.116023	0.115161	0.11504	0.11512	0.11488	0.115212	0.115501
YDR275W	0.127209	0.127894	0.124551	0.124634	0.126542	NaN	0.126084	0.127375	0.132101	NaN	0.125119	0.125737	0.124611	0.12617	0.125764	0.124551	0.125963	0.125637	0.124619	0.124786	0.124551	0.125963	0.125963
YDR276C	0.047619	0.047619	0.047619	0.047619	0.047619	0.0481602	0.0430272	0.047619	0.047619	0.047619	0.0477844	0.047619	0.047619	0.0472884	0.0474988	0.0535714	0.0424265	0.047619	0.0475302	0.047619	0.047619	0.047619	0.047619
YDR277C	0.0883117	0.0884653	0.0865025	0.087878	0.0868504	0.0878369	0.0868414	0.0892333	0.0877468	0.0898574	0.0859371	0.0876972	0.0871852	0.0869292	0.0870766	0.0876972	0.0869782	0.0869292	0.087319	0.0870999	0.0869292	0.0876972	0.0886228
YDR279W	0.135334	0.137287	0.133251	0.137452	0.133509	0.135359	0.134611	0.134689	0.135907	0.13656	0.132899	0.135961	0.136347	0.133717	0.134558	0.132848	0.13369	0.135256	0.136411	0.136531	0.136531	0.136531	0.137357
YDR283C	0.0745655	0.0743796	0.0730195	0.0746244	0.0737287	0.0735463	0.0738905	0.0749659	0.0749982	0.0743653	0.0729277	0.0743748	0.0744187	0.0740872	0.0738395	0.0743653	0.0736113	0.0740111	0.0744208	0.0743875	0.0743653	0.0745655	0.0743704
YDR284C	0.0998224	0.102269	0.101074	0.103196	0.104223	0.102403	0.101973	0.102926	0.102926	0.101597	0.101218	0.102269	0.102313	0.102351	0.102276	0.102926	0.1052	0.10213	0.102754	0.102607	0.102926	0.101776	0.102926
YDR285W	0.129771	0.129763	0.126359	0.12955	0.129632	0.129678	0.12932	0.129125	0.129456	0.130526	0.127156	0.129251	0.129606	0.129061	0.12866	0.129885	0.129157	0.129797	0.129549	0.129653	0.129505	0.129885	0.129612
YDR286C	0.0918577	0.0935347	0.0901186	0.0902891	0.0953954	0.0940711	0.0900358	0.0959157	0.0930171	0.0902997	0.0906822	0.0909467	0.0910848	0.0906017	0.0915532	0.0959157	0.0930788	0.0930171	0.0902159	0.0901186	0.0901186	0.0901186	0.0901186
YDR287W	0.092156	0.0955362	0.0897941	0.0920371	0.0957443	0.09538	0.0927259	0.09538	0.0922071	0.0919647	0.0904316	0.0919452	0.0921013	0.0922835	0.0935696	0.0964729	0.0954265	0.0932783	0.0922889	0.0921013	0.0921013	0.0931942	0.0919332
YDR288W	0.105477	0.10644	0.106179	0.111806	0.105407	0.105192	0.112127	0.104999	0.112464	0.10689	0.10438	0.106768	0.111652	0.106886	0.107069	0.106061	0.105135	0.109817	0.111337	0.111486	0.111368	0.111368	0.111423
YDR291W	0.0965523	0.095576	0.0951453	0.0968642	0.0960928	0.0950469	0.0964396	0.095671	0.0966266	0.0963373	0.0945011	0.0963454	0.0968666	0.0962619	0.0955208	0.0952999	0.0960763	0.0965368	0.0967674	0.0967773	0.096846	0.096846	0.0968619
YDR292C	0.0945362	0.0938166	0.0937294	0.0940901	0.0936604	0.094222	0.0944558	0.0934912	0.0958077	0.0938931	0.0927618	0.093925	0.0933483	0.0940271	0.0935886	0.094563	0.0934456	0.0935736	0.0942151	0.0941759	0.0934912	0.0956348	0.0941508
YDR293C	0.0947368	0.0959129	0.0938231	0.0946602	0.0968481	0.0955971	0.0939507	0.0959157	0.0968677	0.0949522	0.0927243	0.0944852	0.0940536	0.094159	0.0947448	0.0943347	0.0967342	0.0950238	0.0943868	0.0944078	0.0943347	0.0945982	0.0947265
YDR294C	0.0969851	0.0981877	0.098228	0.0990755	0.0988003	0.0976374	0.0982523	0.0985105	0.0955581	0.0959505	0.0971216	0.0984836	0.0973429	0.0977572	0.0972607	0.0962941	0.0986908	0.0982932	0.0987192	0.0989813	0.0985105	0.0985105	0.0985974
YDR295C	0.127147	0.126308	0.126447	0.12731	0.127491	0.127183	0.127514	0.126554	0.127574	0.126801	0.125212	0.127129	0.12662	0.125704	0.126354	0.127048	0.127101	0.12739	0.127205	0.12724	0.12701	0.128036	0.128011
YDR296W	0.107496	0.106761	0.109331	0.108036	0.112268	0.107729	0.107863	0.107863	0.106394	0.108735	0.107618	0.11031	0.108744	0.108108	0.108901	0.112268	0.110862	0.107863	0.108005	0.108434	0.107863	0.107863	0.109519
YDR297W	0.085329	0.0860297	0.084911	0.0863458	0.0853302	0.0848485	0.0861793	0.0871861	0.0854964	0.0854897	0.0854004	0.0846465	0.0861068	0.0861279	0.084733	0.084329	0.0857272	0.0859407	0.0861129	0.0862338	0.0861605	0.0862338	0.0853058
YDR298C	0.0723716	0.0736236	0.072928	0.0729331	0.0744863	0.0731256	0.0728411	0.0728411	0.0740527	0.0729389	0.0728411	0.0732882	0.0729454	0.072928	0.0726198	0.0728411	0.074406	0.0733226	0.0728294	0.0727541	0.0728411	0.0728411	0.0733226
YDR300C	0.0967613	0.0979021	0.0965325	0.0979063	0.0981031	0.0978315	0.0972664	0.0980434	0.0972664	0.0970964	0.0968023	0.0971184	0.0974736	0.0972232	0.0971779	0.0972664	0.0975639	0.0978641	0.0971997	0.0971369	0.0972664	0.0964894	0.0972863
YDR301W	0.0894351	0.0887136	0.0883808	0.0896091	0.0891385	0.0890638	0.0889494	0.0892883	0.0883014	0.0888359	0.0886049	0.0882507	0.0891008	0.0888155	0.0886685	0.0890193	0.0891078	0.0892639	0.0893889	0.0893182	0.0895084	0.0895084	0.0887998
YDR302W	0.0726515	0.0741883	0.0736532	0.0742424	0.0770008	0.0741047	0.0740693	0.0727273	0.0742424	0.074053	0.0724327	0.0725108	0.0735354	0.0732323	0.074273	0.0772727	0.0762734	0.0734266	0.0728234	0.0727273	0.0727273	0.0727273	0.0727661
YDR303C	0.118502	0.117081	0.116583	0.11725	0.1167	0.116479	0.117378	0.117603	0.118545	0.117217	0.116068	0.114874	0.117353	0.117	0.116566	0.116105	0.116384	0.117257	0.11736	0.117395	0.117228	0.117228	0.11864
YDR304C	0.101884	0.102263	0.101888	0.102843	0.102843	0.102977	0.102295	0.104318	0.104318	0.102197	0.101613	0.101227	0.101761	0.101532	0.102142	0.102843	0.102843	0.101708	0.102441	0.10145	0.102843	0.102843	0.102351
YDR306C	0.0920921	0.0925765	0.0909583	0.0959478	0.0939441	0.0919846	0.092666	0.0931233	0.0987137	0.0959721	0.0925337	0.0955424	0.0958605	0.0951723	0.0931444	0.0924274	0.0938192	0.0947292	0.0959588	0.0960615	0.0959069	0.0959069	0.0961567
YDR308C	0.0761444	0.0747598	0.0738592	0.0754352	0.0783448	0.0750054	0.0775966	0.0754352	0.0777993	0.075583	0.0757307	0.0755478	0.0754352	0.0745158	0.0747905	0.0730711	0.0787047	0.0754352	0.0754176	0.0754352	0.0754352	0.0754352	0.0754352
YDR309C	0.100395	0.0991654	0.0991313	0.101425	0.10067	0.0998126	0.101964	0.0996564	0.10143	0.0995221	0.100205	0.100434	0.100745	0.0999427	0.10022	0.0996564	0.100534	0.101903	0.100981	0.100945	0.0996564	0.100515	0.101375
YDR310C	0.114628	0.114595	0.113089	0.115543	0.115937	0.115533	0.115126	0.115562	0.117226	0.114813	0.11484	0.114673	0.115002	0.115268	0.114889	0.114939	0.116297	0.11561	0.115645	0.115821	0.115562	0.116184	0.115889
YDR311W	0.0947252	0.0911557	0.0912174	0.0946429	0.0931315	0.0922699	0.0946734	0.0920814	0.0938874	0.0918222	0.0938166	0.093686	0.0942587	0.0943854	0.0931601	0.0931182	0.0940006	0.0939157	0.0947914	0.0947886	0.0951918	0.0946734	0.0947399
YDR313C	0.104993	0.106407	0.103969	0.107951	0.107134	0.105882	0.106683	0.1034	0.108795	0.107098	0.106102	0.106867	0.107766	0.107382	0.106652	0.106813	0.10875	0.107426	0.108069	0.108014	0.107951	0.107951	0.107309
YDR314C	0.138905	0.140261	0.137946	0.140152	0.140934	0.140342	0.138719	0.140603	0.139322	0.138959	0.138696	0.138917	0.139008	0.139407	0.139554	0.139646	0.140745	0.140198	0.139346	0.139726	0.139646	0.140603	0.139487
YDR315C	0.128729	0.130012	0.128722	0.129448	0.133167	0.130346	0.128231	0.130797	0.13201	0.129822	0.129658	0.129548	0.130009	0.129445	0.130274	0.132925	0.133579	0.129743	0.129379	0.129839	0.129379	0.129379	0.12947
YDR316W	0.111636	0.111465	0.11135	0.111639	0.113062	0.113187	0.111813	0.112802	0.11205	0.11172	0.111036	0.111457	0.11186	0.111154	0.11201	0.112096	0.113463	0.112693	0.111408	0.111389	0.110683	0.110683	0.111697
YDR317W	0.130259	0.127758	0.13083	0.1336	0.132234	0.131581	0.131648	0.129536	0.133578	0.13039	0.131366	0.131831	0.131785	0.131723	0.131062	0.13034	0.132066	0.127992	0.131898	0.131143	0.131946	0.132749	0.13141
YDR319C	0.0940003	0.0941598	0.0938904	0.093625	0.0957293	0.0955372	0.0934152	0.095978	0.0977766	0.0940083	0.0928803	0.0952853	0.0937961	0.0936211	0.095023	0.095978	0.095978	0.0937402	0.0935944	0.0935537	0.0935537	0.0935537	0.0938956
YDR320C	0.155187	0.153615	0.154486	0.154424	0.154878	0.15436	0.153604	0.154541	0.155631	0.15347	0.153982	0.154352	0.154144	0.153934	0.154004	0.153051	0.154784	0.153891	0.154111	0.154155	0.153547	0.154541	0.154592
YDR321W	0.0794106	0.0777776	0.0779126	0.0789307	0.078953	0.078772	0.0792548	0.0780581	0.0790151	0.0798578	0.0788701	0.0793877	0.0791052	0.0790761	0.0786045	0.0806759	0.078188	0.0773868	0.0790914	0.0789791	0.0789307	0.0789307	0.0790873
YDR322W	0.0970932	0.0970026	0.095342	0.0988142	0.0988375	0.0974144	0.0975202	0.0970026	0.0993402	0.0986444	0.096751	0.0973477	0.0983311	0.0972039	0.0973869	0.0962362	0.0981782	0.0967239	0.0987297	0.0987639	0.0988142	0.0988142	0.0983265
YDR323C	0.104874	0.105234	0.104214	0.106296	0.104457	0.10471	0.105926	0.104358	0.105712	0.106942	0.105847	0.104819	0.106511	0.105757	0.104958	0.103712	0.10389	0.104904	0.10679	0.107085	0.106296	0.106942	0.106378
YDR325W	0.112306	0.112423	0.112034	0.112524	0.112124	0.112617	0.11121	0.112995	0.112706	0.111152	0.111192	0.112202	0.112077	0.112141	0.111755	0.112675	0.112116	0.111393	0.112254	0.112194	0.112354	0.112034	0.112363
YDR326C	0.1008	0.100907	0.100729	0.101153	0.102534	0.101661	0.0997379	0.101262	0.101873	0.10106	0.10013	0.100805	0.101077	0.100954	0.100821	0.101724	0.102296	0.1008	0.101158	0.101121	0.101244	0.101262	0.100587
YDR328C	0.0716084	0.0720113	0.0717603	0.0721514	0.073835	0.0719503	0.0719503	0.0719503	0.0701306	0.0729652	0.0719503	0.0717061	0.0720642	0.0719503	0.0719157	0.0719503	0.0735142	0.0712928	0.0719375	0.0721402	0.0719503	0.0719503	0.0719503
YDR329C	0.115385	0.11602	0.114237	0.115513	0.117479	0.117352	0.114749	0.115913	0.119562	0.117633	0.114949	0.114835	0.115359	0.115326	0.115096	0.115913	0.116827	0.113012	0.115358	0.115116	0.116667	0.115913	0.115855
YDR330W	0.0946155	0.0947056	0.0947188	0.0941936	0.0949789	0.0950742	0.0937428	0.0963419	0.0987195	0.0958231	0.093815	0.0947925	0.0943056	0.0941285	0.0948797	0.0970059	0.0944629	0.0947074	0.0948305	0.0945343	0.0950139	0.0950139	0.0943328
YDR331W	0.0967564	0.0972187	0.0970182	0.0964471	0.0989658	0.0978229	0.0972996	0.0971609	0.0978395	0.0966805	0.0967676	0.096506	0.0966755	0.0966665	0.097293	0.0995881	0.0980216	0.0967875	0.0964877	0.0967564	0.0963519	0.0963519	0.0963726
YDR332W	0.0977009	0.0990432	0.0976888	0.0971454	0.0981751	0.0979798	0.0971178	0.0976285	0.100344	0.100602	0.0965549	0.0966393	0.0969521	0.0969307	0.0974821	0.0990777	0.0971556	0.0977399	0.0967001	0.096877	0.0966623	0.0966623	0.096588
YDR333C	0.110802	0.11077	0.111205	0.113323	0.111661	0.110369	0.111029	0.111029	0.111029	0.110249	0.111457	0.111655	0.11245	0.112591	0.111235	0.111029	0.111656	0.110366	0.112422	0.112591	0.112843	0.112389	0.112878
YDR334W	0.108302	0.108234	0.108014	0.100618	0.109235	0.108647	0.108085	0.109686	0.110303	0.109405	0.107605	0.108451	0.108749	0.108563	0.108424	0.107489	0.108868	0.107556	0.10913	0.108868	0.108807	0.109247	0.109433
YDR336W	0.121568	0.120561	0.119972	0.121	0.1212	0.120452	0.120143	0.120262	0.121273	0.120127	0.119899	0.120511	0.120819	0.120552	0.120146	0.120262	0.120418	0.120262	0.120333	0.120262	0.120262	0.120262	0.119887
YDR337W	0.0948474	0.0914634	0.0946926	0.0949089	0.092057	0.0917538	0.0947645	0.0910147	0.0910147	0.0942086	0.0928052	0.0926186	0.0951184	0.0947571	0.0923116	0.0921761	0.0919043	0.0924441	0.0956561	0.0956604	0.0956604	0.0956604	0.0956604
YDR338C	0.0868056	0.0872571	0.086324	0.0819416	0.0866637	0.0874608	0.0868774	0.08659	0.0880423	0.0866649	0.0863173	0.0862708	0.08659	0.0868029	0.08616	0.087069	0.0871301	0.0855585	0.0867759	0.0866699	0.08659	0.08659	0.0872286
YDR339C	0.10386	0.100288	0.104932	0.103756	0.100981	0.100032	0.103609	0.102105	0.102105	0.103366	0.10386	0.101855	0.103392	0.102885	0.100918	0.100351	0.100761	0.100081	0.103853	0.10386	0.10386	0.10386	0.104444
YDR347W	0.107091	0.10647	0.106211	0.10341	0.106211	0.107152	0.104939	0.106211	0.107246	0.10702	0.105147	0.105915	0.106073	0.106039	0.10596	0.108282	0.106211	0.10422	0.106242	0.106211	0.106211	0.106211	0.106211
YDR348C	0.098097	0.0985006	0.0985253	0.0861364	0.0978928	0.0987879	0.100225	0.10097	0.0971202	0.0984754	0.0970614	0.0988312	0.098804	0.0979663	0.0979631	0.098303	0.0986435	0.0959953	0.098571	0.098596	0.0993939	0.098303	0.0991127
YDR349C	0.115981	0.119539	0.117591	0.116459	0.11782	0.117101	0.116879	0.117405	0.117639	0.115625	0.116358	0.117671	0.11774	0.11663	0.116661	0.116847	0.118866	0.115172	0.117584	0.117529	0.117964	0.117405	0.118364
YDR350C	0.118862	0.121201	0.119897	0.120173	0.12019	0.119765	0.120488	0.121081	0.120116	0.118759	0.119493	0.120667	0.121306	0.120598	0.119809	0.120116	0.120485	0.118706	0.121837	0.121858	0.121081	0.122045	0.120734
YDR351W	0.11681	0.118836	0.118302	0.119271	0.117372	0.118304	0.119202	0.117639	0.119155	0.11788	0.117542	0.119419	0.119591	0.118538	0.117791	0.116868	0.117877	0.116661	0.119765	0.119887	0.119566	0.119951	0.119645
YDR352W	0.103512	0.101527	0.0987654	0.0995807	0.101005	0.0954831	0.101557	0.100629	0.097721	0.100596	0.0977754	0.0989817	0.099441	0.0981249	0.0983207	0.0985325	0.100785	0.0946622	0.0986694	0.098649	0.0985325	0.0985325	0.10036
YDR353W	0.0627083	0.0631696	0.0637731	0.0645833	0.0631143	0.0631629	0.0644345	0.0625	0.0645833	0.0643555	0.0640914	0.0644841	0.0648611	0.0644097	0.0636574	0.0625	0.0630098	0.0629808	0.0645911	0.0646412	0.0645833	0.0645833	0.0636485
YDR354W	0.104498	0.106566	0.107448	0.106868	0.106525	0.107134	0.107366	0.106816	0.106816	0.106652	0.106172	0.107899	0.108158	0.107351	0.106604	0.105941	0.106314	0.106009	0.108471	0.108809	0.107691	0.108566	0.107399
YDR356W	0.119097	0.120857	0.119414	0.120627	0.122251	0.121372	0.121154	0.121437	0.121801	0.120213	0.119575	0.120261	0.12059	0.12028	0.120557	0.121789	0.122277	0.119944	0.120357	0.120378	0.120378	0.120378	0.12084
YDR358W	0.125521	0.127382	0.127138	0.128	0.12751	0.127566	0.127676	0.126208	0.127249	0.127496	0.127627	0.128598	0.128877	0.128233	0.127795	0.126806	0.127835	0.127127	0.128678	0.128598	0.13039	0.129793	0.128628
YDR359C	0.131941	0.132554	0.131286	0.133278	0.133197	0.131619	0.132061	0.130762	0.132782	0.133466	0.131838	0.132606	0.132625	0.132277	0.132387	0.133533	0.131736	0.131617	0.13281	0.13252	0.132782	0.132782	0.132877
YDR361C	0.0804951	0.0792292	0.0763089	0.0788519	0.0781296	0.0793854	0.0805957	0.0788519	0.0800256	0.0799156	0.0780042	0.0789637	0.0788519	0.0789171	0.0782117	0.0788519	0.078727	0.0770462	0.0788607	0.0792431	0.0788519	0.0788519	0.0792431
YDR362C	0.118204	0.11812	0.118118	0.117954	0.118878	0.11806	0.118477	0.117925	0.116903	0.115913	0.117953	0.118303	0.11885	0.1182	0.11817	0.11842	0.117483	0.117392	0.118973	0.118751	0.118916	0.11842	0.118624
YDR363W	0.125463	0.126358	0.125371	0.127199	0.12573	0.126716	0.128343	0.126384	0.125043	0.125769	0.126637	0.127009	0.127211	0.126668	0.125986	0.124925	0.128402	0.125991	0.127133	0.127195	0.127114	0.127114	0.129133
YDR364C	0.109309	0.110146	0.107053	0.109365	0.11002	0.109964	0.108717	0.110692	0.108767	0.108759	0.108054	0.109167	0.108703	0.108953	0.109442	0.109964	0.110522	0.108509	0.108517	0.108873	0.108509	0.108509	0.110039
YDR365C	0.0989027	0.0983253	0.0971682	0.0989601	0.0995928	0.0986409	0.0974801	0.0984008	0.0986905	0.098863	0.0983274	0.0988788	0.0989643	0.098841	0.0985982	0.0994573	0.0991763	0.09771	0.0990454	0.0990465	0.0989291	0.0989291	0.0994573
YDR368W	0.110383	0.115358	0.1091	0.110004	0.111985	0.112305	0.11033	0.112886	0.111821	0.111056	0.109736	0.110046	0.109833	0.110164	0.110896	0.113951	0.111821	0.110674	0.109802	0.10975	0.109691	0.109691	0.11051
YDR369C	0.177271	0.178553	0.175703	0.178646	0.179543	NaN	0.177702	0.177736	0.181207	0.177179	0.177912	0.178103	0.178484	0.177918	0.177878	0.177736	0.180185	0.178242	0.178298	0.178058	0.178123	0.178123	0.177785
YDR372C	0.0689655	0.0709839	0.0691784	0.0699234	0.0706356	0.0707071	0.0696497	0.0699234	0.0708812	0.0704921	0.0694977	0.0701514	0.0701149	0.0696573	0.0704749	0.0708812	0.0709424	0.0700707	0.0699413	0.0698702	0.0699234	0.0699234	0.0699234
YDR373W	0.0803665	0.078534	0.0798914	0.0803819	0.0798317	0.0786927	0.0798803	0.0767888	0.0802792	0.0801156	0.0798914	0.0805285	0.0801629	0.0801823	0.0797856	0.078534	0.0802421	0.080145	0.0802792	0.0802792	0.0802792	0.0802792	0.078534
YDR374C	0.121336	0.124864	0.123115	0.124864	0.124407	0.123976	0.123251	0.121607	0.124094	0.122828	0.123432	0.12383	0.123706	0.123899	0.123689	0.12595	0.124518	0.124781	0.124099	0.124382	0.123779	0.123779	0.123779
YDR375C	0.0928155	0.0929978	0.0944161	0.0949071	0.093774	0.0929647	0.0937585	0.0926331	0.0948448	0.0935221	0.0940615	0.093814	0.0940919	0.0936462	0.0935983	0.0940919	0.0938746	0.0947091	0.0943804	0.0940109	0.0940919	0.0940919	0.0926144
YDR376W	0.106849	0.107504	0.1071	0.107446	0.107184	0.106981	0.106015	0.107962	0.106722	0.10776	0.107362	0.106709	0.107018	0.106988	0.107056	0.107287	0.106756	0.10791	0.107849	0.107475	0.107962	0.107962	0.107339
YDR377W	0.0786988	0.0804261	0.0815673	0.0790255	0.0822935	0.0802139	0.0850946	0.0822935	0.0790255	0.0796383	0.0870139	0.0790255	0.0859972	0.0817489	0.083911	0.0790255	0.0822935	0.0880753	0.0878296	0.0850168	0.0888295	0.0888295	0.0888295
YDR378C	0.0994253	0.0957854	0.0966369	0.0996169	0.0961784	0.0957854	0.100383	0.091954	0.103572	0.0965038	0.101639	0.0990695	0.101405	0.100043	0.0989976	0.091954	0.0961115	0.102859	0.102948	0.101745	0.103448	0.103448	0.103448
YDR379W	0.11797	NaN	0.11762	0.119084	0.119379	0.119472	0.118725	0.118482	0.120068	0.12008	0.117923	0.118513	0.118175	0.118665	0.118685	0.119142	0.11924	0.118533	0.11852	0.118372	0.118482	0.119142	0.119463
YDR380W	0.102559	0.103661	0.10285	0.101834	0.104285	0.104488	0.102371	0.103345	0.103463	0.101805	0.101666	0.102646	0.102157	0.10218	0.102911	0.104393	0.104415	0.102014	0.102018	0.101889	0.102297	0.101772	0.102297
YDR382W	0.021875	0.0208333	0.020668	0.0208333	0.0209096	0.0208333	0.0208333	0.0208333	0.0238095	0.0232515	0.0208333	0.0208333	0.0210317	0.0208333	0.0209536	0.0208333	0.0208333	0.0208333	0.0211998	0.0209987	0.0208333	0.0208333	0.0208333
YDR383C	0.123995	0.123866	0.124685	0.128126	0.124727	0.124002	0.12503	0.121973	0.125122	0.124501	0.123581	0.123567	0.125971	0.127552	0.124959	0.121973	0.122329	0.127766	0.128036	0.126777	0.127552	0.127552	0.127552
YDR384C	0.0940821	0.0953934	0.0922303	0.0935209	0.0932677	0.0937857	0.0929952	0.0968599	0.0944444	0.0946782	0.0931864	0.0940994	0.0933172	0.0931696	0.0936271	0.0956522	0.0932367	0.0934225	0.0932683	0.0935722	0.0931438	0.0932367	0.0933606
YDR386W	0.121593	0.122959	0.121877	0.121853	0.12257	0.12267	0.12188	0.122287	0.122372	0.119884	0.12184	0.121559	0.121479	0.121672	0.121792	0.124393	0.123071	0.122003	0.121776	0.12176	0.122287	0.122813	0.121855
YDR387C	0.10079	0.0999681	0.0980125	0.0994114	0.0988592	0.100065	0.0996683	0.0988119	0.0995274	0.102072	0.0992865	0.100182	0.0993686	0.100111	0.0994901	0.100011	0.0996282	0.099273	0.100647	0.100078	0.10121	0.100011	0.10078
YDR389W	0.0887874	0.0873704	0.0845256	0.0877787	0.0858135	0.0853097	0.0868305	0.0860984	0.0877334	0.0881405	0.0870272	0.0876906	0.0877254	0.087908	0.0866729	0.0875698	0.0859549	0.0857745	0.0880923	0.0878798	0.0880771	0.0890918	0.0877259
YDR393W	0.10252	0.101743	0.10427	0.102576	0.102967	0.10059	0.103322	0.100259	0.101717	0.101717	0.101474	0.101856	0.102973	0.102771	0.101336	0.101717	0.102522	0.101886	0.103457	0.103055	0.10312	0.102447	0.103962
YDR394W	0.0590132	0.0592186	0.0583182	0.0589606	0.0610045	0.0607473	0.0586081	0.0606061	0.0582751	0.0582022	0.0585772	0.0583861	0.0591039	0.0591384	0.0596093	0.0598291	0.0606061	0.0598888	0.0591622	0.0590521	0.0598291	0.0598291	0.0591118
YDR395W	0.0830319	0.0843698	0.0821834	0.0831056	0.0832386	0.0827	0.0818956	0.0834375	0.0838586	0.0825614	0.0814142	0.0827825	0.0824969	0.083026	0.0822546	0.0820266	0.0828221	0.0821623	0.0828927	0.0830456	0.0827321	0.0827321	0.0830848
YDR398W	0.0922821	0.0932967	0.0921652	0.0852489	0.0934254	0.0927739	0.0927473	0.0948718	0.0938296	0.0925801	0.0915741	0.0921123	0.0922051	0.0922792	0.0924217	0.0912821	0.0918385	0.0929389	0.0920264	0.0922792	0.0928205	0.0923077	0.0923077
YDR399W	0.0784603	0.0781707	0.0795947	0.059771	0.0804161	0.0782146	0.0788464	0.0817636	0.0797777	0.0780098	0.0786355	0.0789036	0.0787606	0.078844	0.0792004	0.0802621	0.0795273	0.0798001	0.0788558	0.0787606	0.0802621	0.0787606	0.0785681
YDR402C	0.119558	0.121846	0.119055	0.113938	0.119642	0.118794	0.118727	0.12034	0.121503	0.118895	0.118139	0.118753	0.118807	0.118942	0.119027	0.11898	0.118299	0.120549	0.119078	0.119509	0.11966	0.11898	0.119625
YDR403W	0.0890413	0.0877026	0.0893134	0.0887515	0.0863151	0.086959	0.0856304	0.0894983	0.0877963	0.0896518	0.0850646	0.0876093	0.0873465	0.0884105	0.087578	0.0870154	0.0863683	0.0879357	0.0890583	0.0890375	0.088934	0.088934	0.0906848
YDR404C	0.0565891	0.0557171	0.0563092	0.0562016	0.0542636	0.0551445	0.0542082	0.0562016	0.0562016	0.0562016	0.0548288	0.0559247	0.0554264	0.0559862	0.0550857	0.0523256	0.0546347	0.0548599	0.0563028	0.0563092	0.0562016	0.0581395	0.0563009
YDR405W	0.108902	0.108451	0.109217	0.108734	0.109751	0.109734	0.108658	0.108586	0.109034	0.108625	0.108761	0.109668	0.108838	0.108656	0.108905	0.109848	0.109848	0.10946	0.10901	0.108656	0.108586	0.108586	0.108748
YDR406W	0.0847375	0.0852128	0.086563	0.0860737	0.0860783	0.0851588	0.0843012	0.0849428	0.0866015	0.0859419	0.0850868	0.0856556	0.0849716	0.0857229	0.0851151	0.0838294	0.0860045	0.0852253	0.0859632	0.0855908	0.0855908	0.0860229	0.0862057
YDR407C	0.10971	0.110359	0.110392	0.109873	0.1113	0.110171	0.108927	0.109843	0.110409	0.10994	0.109463	0.110704	0.109688	0.110173	0.11002	0.109584	0.111393	0.110141	0.110047	0.109957	0.109843	0.109843	0.109604
YDR408C	0.0932558	0.0932337	0.0913695	0.0920839	0.0916279	0.0930374	0.0910963	0.0931783	0.0931783	0.0922578	0.0900991	0.090742	0.0911111	0.0916279	0.0917689	0.0947287	0.0916279	0.0932976	0.0916858	0.0916279	0.0916279	0.0916279	0.0918664
YDR410C	0.126826	0.130669	0.126312	0.126619	0.128321	0.13014	0.126777	0.128002	0.1276	0.126662	0.126619	0.127475	0.126803	0.126542	0.127192	0.128002	0.129385	0.127044	0.126676	0.126696	0.126619	0.126619	0.12747
YDR411C	0.121194	0.120241	0.121335	0.121619	0.12069	0.119086	0.118967	0.120415	0.121649	0.120445	0.120875	0.12125	0.12074	0.12101	0.119765	0.11944	0.11944	0.119927	0.121288	0.121335	0.121389	0.121389	0.121389
YDR412W	0.0882062	0.0889831	0.0876491	0.0875706	0.0895625	0.0891115	0.0871267	0.0889831	0.0885274	0.0881003	0.0871979	0.0876379	0.0881356	0.087963	0.0883981	0.0889831	0.0889831	0.0897436	0.0875759	0.0875706	0.0875706	0.0875706	0.0877517
YDR415C	0.118356	0.117752	0.118331	0.119127	0.118452	0.116517	0.116381	0.118133	0.117359	0.116578	0.117874	0.119403	0.118726	0.119121	0.117765	0.116356	0.118247	0.119022	0.119579	0.119022	0.119022	0.119022	0.118977
YDR421W	0.113838	0.113557	0.11215	0.113705	0.112088	0.111379	0.112012	0.111905	0.112991	0.11217	0.11293	0.113524	0.112948	0.112963	0.11207	0.110544	0.112592	0.111146	0.113524	0.113549	0.113605	0.113605	0.113972
YDR422C	0.106376	0.106354	0.105343	0.107447	0.105345	0.106079	0.106011	0.107095	0.107198	0.106895	0.105393	0.107038	0.106802	0.106629	0.106022	0.1047	0.105124	0.105252	0.106644	0.106474	0.106296	0.106696	0.10645
YDR425W	0.103965	0.103326	0.105663	0.104845	0.102418	0.102866	0.103637	0.101462	NaN	0.10459	0.103732	0.104302	0.104302	0.104243	0.103075	0.101994	0.102833	0.103674	0.10462	0.104302	0.104657	0.104657	0.104026
YDR427W	0.0788609	0.0786253	0.0811029	0.0811278	0.0774693	0.0778342	0.0792537	0.0798339	0.0781418	0.0795695	0.0792934	0.0809216	0.0798339	0.0799279	0.0788084	0.0798339	0.0783578	0.0788577	0.0806136	0.0796459	0.0806799	0.0806799	0.0806799
YDR428C	0.100179	0.102987	0.100554	0.100625	0.0991566	0.0993523	0.100079	0.09808	0.101815	0.102294	0.100077	0.100927	0.1002	0.100413	0.100061	0.0993523	0.0982425	0.098863	0.10127	0.0998471	0.103169	0.100625	0.100625
YDR429C	0.0513969	0.0513378	0.0522244	0.0522244	0.0512848	0.0508274	0.0515152	0.0498603	0.0523388	0.0511162	0.0517319	0.0522244	0.0518304	0.05229	0.051496	0.0510423	0.0520735	0.0513151	0.0523082	0.0515677	0.0522244	0.0522244	0.0510726
YDR430C	0.107912	0.108225	0.107172	0.108685	0.107973	0.108463	0.10721	0.108923	0.109046	0.108344	0.107141	0.108377	0.108002	0.108062	0.107885	0.106566	0.108314	0.107679	0.108395	0.107894	0.108249	0.108586	0.108068
YDR434W	0.0878949	0.0890523	0.0882693	0.0885837	0.0883767	0.0877711	0.0878268	0.0884395	0.0898232	0.0884587	0.0870353	0.0884979	0.0881536	0.087146	0.0877401	0.0879211	0.0884526	0.0883924	0.0885196	0.0885757	0.0884395	0.0890523	0.0890366
YDR435C	0.122189	0.1201	0.120542	0.12209	0.122651	0.120642	0.119446	0.123085	0.122828	0.122618	0.118966	0.120621	0.120896	0.119768	0.12013	0.12209	0.119888	0.120176	0.121232	0.12115	0.12209	0.1201	0.120176
YDR436W	0.097305	0.0970282	0.0970093	0.0968134	0.0975767	0.0980817	0.0972253	0.0965113	0.0961047	0.0978827	0.0963687	0.0972005	0.0970716	0.0965632	0.096931	0.0979119	0.0979119	0.0970859	0.0968057	0.0968226	0.097445	0.0969782	0.0974809
YDR437W	0.097593	0.0987074	0.0973565	0.0974956	0.0997206	0.0977864	0.0973565	0.0973565	0.0975091	0.0973565	0.0973565	0.0983697	0.0976718	0.0973565	0.0976431	0.0973565	0.101079	0.0973565	0.0973742	0.0977506	0.0973565	0.0973565	0.0997812
YDR439W	0.135139	0.134212	0.130884	0.131049	0.134806	0.13441	0.130991	0.132847	0.13183	0.132907	0.131162	0.132028	0.131956	0.13168	0.13278	0.135712	0.136668	0.131378	0.131236	0.13099	0.130937	0.130937	0.130961
YDR440W	0.124634	0.126131	0.125238	0.123113	0.12638	0.125253	0.12362	0.121937	0.125074	0.125389	0.123465	0.124917	0.125232	0.124763	0.124969	0.12432	0.126502	0.123794	0.124824	0.12489	0.12489	0.12546	0.12432
YDR441C	0.118939	0.122354	0.120333	0.119868	0.119543	0.121046	0.119528	0.121046	0.121696	0.119157	0.119011	0.120697	0.120679	0.119723	0.119737	0.119214	0.119214	0.120482	0.119303	0.119214	0.119214	0.119214	0.121703
YDR443C	0.0953606	0.09568	0.0960394	0.0952431	0.0982302	0.0965051	0.0944642	0.0963362	0.0966209	0.0961402	0.094865	0.0953407	0.0957322	0.0956393	0.0965659	0.0967293	0.097982	0.0950497	0.0954263	0.095136	0.095407	0.0956393	0.09555
YDR444W	0.10625	0.107641	0.10625	0.106692	0.105946	0.106933	0.105371	0.106977	0.107477	0.106489	0.104736	0.106469	0.106492	0.106385	0.105939	0.106492	0.105997	0.107349	0.106939	0.105981	0.106977	0.106977	0.106554
YDR446W	0.115416	0.116442	0.116372	0.115419	0.117815	0.115829	0.114719	0.118321	0.115032	0.114621	0.114788	0.115711	0.11547	0.11558	0.116328	0.115032	0.118345	0.115285	0.116083	0.114605	0.116128	0.117225	0.113935
YDR448W	0.095884	0.0959056	0.0956237	0.0956261	0.096667	0.095994	0.0951929	0.0963375	0.0955817	0.0957706	0.0947943	0.0956177	0.0953297	0.0954977	0.0956275	0.0955817	0.0971416	0.0954654	0.0957335	0.0957076	0.0955817	0.0955817	0.0958142
YDR449C	0.0950423	0.0964676	0.0953068	0.0953068	0.0954231	0.0956504	0.0950045	0.094551	0.0992324	0.0953068	0.0947609	0.0955948	0.0955084	0.0955588	0.0952457	0.0953068	0.0953068	0.0940858	0.0955719	0.0955588	0.0960627	0.0968185	0.0955006
YDR451C	0.121878	0.123877	0.124204	0.123005	0.124208	0.123005	0.121476	0.122066	0.12355	0.122975	0.121857	0.122915	0.122692	0.122327	0.122938	0.122066	0.123884	0.122788	0.12222	0.122066	0.122066	0.122066	0.122764
YDR452W	0.0994318	0.100763	0.100121	0.0999442	0.0993931	0.099681	0.0984785	0.0988836	0.10044	0.0991272	0.0990258	0.0991388	0.0996308	0.0992872	0.0991203	0.0988836	0.100381	0.099071	0.0997546	0.0992085	0.100346	0.0993709	0.0992709
YDR453C	0.110047	0.110696	0.110434	0.112242	0.108894	0.115228	0.110103	0.115228	0.111626	0.112214	0.109471	0.110313	0.110039	0.110058	0.109962	0.110152	0.108424	0.110152	0.110393	0.110152	0.110152	0.110152	0.110109
YDR454C	0.0979046	0.0938392	0.0994609	0.0989684	0.0936493	0.0934881	0.0958782	0.0936493	0.094736	0.0919316	0.096235	0.0987151	0.0977864	0.0978849	0.0952253	0.0936493	0.0937624	0.0944676	0.0988295	0.0974909	0.0989684	0.0971954	0.0990139
YDR457W	0.0919598	0.092769	0.0920997	0.0919871	0.0923186	0.0924479	0.0915585	0.0928131	0.0933139	0.092332	0.0915092	0.0921791	0.0923354	0.0921337	0.0922012	0.0926889	0.0926759	0.091983	0.0919378	0.0919751	0.0917633	0.0918732	0.0922209
YDR459C	0.110044	0.111122	0.110916	0.110526	0.111538	0.112121	0.109749	0.111404	0.112507	0.109932	0.109929	0.110735	0.110702	0.110916	0.110863	0.109649	0.111348	0.110121	0.110536	0.11077	0.110526	0.110526	0.110526
YDR460W	0.0765528	0.0757542	0.076547	0.0764219	0.0761533	0.0766046	0.0763975	0.0766046	0.0766379	0.0777692	0.0764176	0.0764567	0.0771567	0.0764895	0.0762595	0.0766046	0.0764504	0.0758879	0.0767668	0.0762595	0.0766046	0.0776398	0.0771089
YDR461W	0.0704341	0.0704341	0.0694331	0.0704341	0.0704341	0.0712531	0.0701767	0.0704341	0.0704341	0.0690264	0.0670557	0.0704341	0.0704341	0.0694331	0.0697061	0.0704341	0.0704341	0.0669691	0.0703332	0.0704341	0.0704341	0.0704341	0.0706651
YDR462W	0.107883	0.109073	0.108108	0.108241	0.109032	0.108313	0.109331	0.11036	0.108108	0.109586	0.108265	0.108108	0.108408	0.108984	0.108495	0.11036	0.1083	0.110187	0.108596	0.108358	0.108108	0.108108	0.107704
YDR463W	0.116873	0.119999	0.119034	0.117972	0.119422	0.118013	0.116672	0.119176	0.11637	0.119076	0.115284	0.118201	0.118622	0.117612	0.117826	0.119176	0.119503	0.115485	0.117687	0.117328	0.117897	0.117897	0.116043
YDR464W	0.134242	0.135188	0.132794	0.132726	0.1353	0.134672	0.133336	0.134659	0.133905	0.133466	0.132399	0.133579	0.133718	0.133296	0.133557	0.134428	0.134831	0.132469	0.132968	0.133142	0.133039	0.132807	0.132932
YDR465C	0.0962597	0.100406	0.0964923	0.0973632	0.0999159	0.0995462	0.0961562	0.0985946	0.0969064	0.0984185	0.0956536	0.0964859	0.0968233	0.0968054	0.097635	0.0993998	0.0997767	0.0966127	0.0964657	0.0961792	0.0961792	0.0961792	0.0964063
YDR466W	0.109723	0.110028	0.10931	0.109532	0.11006	0.109685	0.10913	0.110244	0.110613	0.109377	0.108799	0.109318	0.109274	0.109529	0.109207	0.108771	0.110429	0.108467	0.109406	0.109509	0.10913	0.109848	0.109402
YDR468C	0.0982222	0.0986772	0.100494	0.0994336	0.0992213	0.0995286	0.0992169	0.0977778	0.100741	0.100417	0.0986626	0.0992593	0.098963	0.099177	0.0987954	0.0977778	0.0992593	0.0981197	0.0993366	0.0992593	0.0992593	0.0992593	0.100019
YDR469W	0.127901	0.127035	0.125239	0.127684	0.125247	0.125344	0.127671	0.125344	0.131026	0.131204	0.12587	0.127509	0.127365	0.127238	0.126454	0.13292	0.125344	0.125781	0.127472	0.12787	0.127238	0.127238	0.126995
YDR470C	0.101578	0.102296	0.101869	0.102156	0.10156	0.101852	0.10237	0.101611	0.106156	0.101508	0.100466	0.101391	0.102008	0.101942	0.101311	0.103595	0.101611	0.101255	0.1023	0.102162	0.102273	0.102934	0.102578
YDR472W	0.122519	0.121765	0.123204	0.121432	0.12206	0.122172	0.122175	0.121639	0.12357	0.122336	0.120824	0.123092	0.1225	0.121574	0.12203	0.122813	0.122838	0.122542	0.121972	0.121639	0.122722	0.121639	0.122301
YDR473C	0.12101	0.121736	0.120512	0.121029	0.121411	0.121482	0.121893	0.120904	0.121155	0.121941	0.120894	0.121072	0.121563	0.121689	0.121225	0.120904	0.121685	0.120795	0.121463	0.121375	0.12161	0.120904	0.121284
YDR475C	0.116874	0.116051	0.117824	0.117669	0.116378	0.11615	0.116532	0.115877	0.119311	0.114736	0.115683	0.116109	0.11678	0.116984	0.116215	0.116253	0.115524	0.116484	0.117459	0.117695	0.117381	0.117758	0.117459
YDR476C	0.0805185	0.0814286	0.0822222	0.08122	0.079886	0.08	0.0813968	0.0814815	0.0785185	0.0814815	0.0803086	0.0804938	0.0808889	0.0809877	0.0804938	0.08	0.0802837	0.080114	0.0813816	0.0814815	0.0814815	0.0814815	0.0816714
YDR477W	0.0731795	0.072337	0.0731795	0.0734057	0.0746851	0.0738555	0.0734066	0.0718974	0.0724268	0.0732756	0.0731011	0.0735824	0.0731624	0.073037	0.0726405	0.0724103	0.0737196	0.0726469	0.0731565	0.0733504	0.0739487	0.0729231	0.0734096
YDR478W	0.146	0.145119	0.143627	0.143529	0.149254	0.147727	0.143333	0.148333	0.143871	0.146979	0.144074	0.144841	0.144556	0.144167	0.144899	0.15	0.147376	0.148974	0.143775	0.144074	0.143333	0.145	0.143333
YDR479C	0.101682	0.102643	0.101508	0.101176	0.102789	0.103489	0.101158	0.101742	0.102555	0.101273	0.101175	0.101227	0.101261	0.101275	0.101669	0.103544	0.102828	0.101696	0.101056	0.101542	0.101141	0.101141	0.100987
YDR480W	0.124827	0.123019	0.122729	0.122555	0.124119	0.12673	0.122909	0.124673	0.128954	0.124142	0.121729	0.122909	0.122889	0.122844	0.123363	0.122615	0.125833	0.123565	0.122692	0.122844	0.122615	0.123644	0.123143
YDR481C	0.100248	0.101214	0.100694	0.101542	0.100486	0.103318	0.100419	0.102093	0.102036	0.100407	0.100474	0.100084	0.101429	0.100368	0.100844	0.103265	0.104199	0.102589	0.10149	0.101312	0.101552	0.101507	0.101627
YDR482C	0.0683824	0.0758929	0.0690359	0.0687716	0.073278	0.0726381	0.0687675	0.0759804	0.0739247	0.067402	0.069104	0.0689776	0.0696078	0.0703976	0.0711527	0.0710784	0.0757718	0.071644	0.0686459	0.0684913	0.0686275	0.0686275	0.0708899
YDR483W	0.105388	0.108783	0.103818	0.103906	0.109548	0.109865	0.104139	0.0985868	0.104759	0.105897	0.103466	0.10389	0.104466	0.104483	0.104845	0.109798	0.110465	0.10859	0.103509	0.103486	0.103818	0.103818	0.103818
YDR484W	0.10316	0.105767	0.103596	0.103134	0.103307	0.103937	0.103001	0.102615	0.104206	0.103231	0.10206	0.103332	0.103238	0.103221	0.102825	0.105211	0.104162	0.103214	0.103204	0.103134	0.103134	0.103134	0.103147
YDR485C	0.139528	0.140671	0.140195	0.140407	0.141478	0.140449	0.139948	0.139854	0.140382	0.140225	0.138714	0.13964	0.140208	0.13965	0.13925	0.139854	0.140193	0.1391	0.14026	0.140535	0.140263	0.140671	0.140389
YDR486C	0.0845765	0.0878427	0.0830887	0.0836799	0.0845437	0.0844341	0.0830503	0.0815851	0.0830096	0.0836328	0.0836031	0.0838236	0.0833895	0.0834053	0.083801	0.0844341	0.0844341	0.0854203	0.0830787	0.0831535	0.0830096	0.0830096	0.0840688
YDR488C	0.156327	0.153858	0.150137	0.151041	0.153037	0.153047	0.151218	0.153501	0.151629	0.150439	0.149288	0.150202	0.151545	0.151733	0.15161	0.152253	0.152279	0.153549	0.151	0.150866	0.15038	0.15038	0.150604
YDR489W	0.092514	0.095008	0.0923185	0.0923185	0.094363	0.0931239	0.0929197	0.093426	0.0952121	0.0927338	0.0931645	0.0930041	0.0934998	0.0928722	0.0932917	0.0945334	0.0957115	0.0935111	0.0928103	0.0923801	0.0923185	0.0923185	0.0921482
YDR492W	0.0718191	0.0740198	0.0729641	0.0732975	0.0718812	0.0732244	0.0723749	0.0725552	0.0715037	0.0725223	0.0709195	0.0714035	0.0720645	0.0717958	0.0721091	0.0725552	0.0715932	0.0732832	0.0720922	0.0720879	0.0715037	0.0725552	0.0715037
YDR493W	0.0915078	0.0927943	0.0908955	0.091326	0.0889541	0.0889541	0.0911814	0.0889541	0.0970186	0.0924823	0.0901861	0.0898501	0.0911046	0.0913435	0.0900402	0.0889541	0.0902695	0.0916422	0.0916824	0.0908955	0.0943304	0.0916422	0.0916422
YDR497C	0.0914167	0.0901062	0.0917206	0.092201	0.0916037	0.0919969	0.090135	0.0915307	0.0922743	0.0902308	0.0894177	0.0918908	0.0908469	0.0913177	0.0907553	0.0909609	0.0915307	0.0926703	0.0913819	0.0912774	0.0908732	0.0909609	0.0943066
YDR499W	0.10509	0.105487	0.103903	0.103977	0.104057	0.103896	0.103697	0.104511	0.104896	0.104213	0.102518	0.103892	0.103443	0.103952	0.103429	0.103121	0.103854	0.1036	0.104048	0.103853	0.104388	0.103977	0.104422
YDR501W	0.135372	0.137217	0.135291	0.136309	0.135671	0.137578	0.134604	0.13833	0.135847	NaN	0.134849	0.13527	0.13624	0.135291	0.135856	0.136421	0.135149	0.135981	0.137055	0.136103	0.137058	0.137058	0.136515
YDR502C	0.0561608	0.0584388	0.0563352	0.0564876	0.0577887	0.0567507	0.0563365	0.0562881	0.0571362	0.0574013	0.0566061	0.0566516	0.0570797	0.056665	0.0566993	0.0579844	0.058201	0.0577234	0.0565951	0.0565708	0.0562881	0.0571362	0.0571797
YDR507C	0.0985936	0.100711	0.0986471	0.0986959	0.0991061	0.0992889	0.099207	0.0981093	0.100277	0.0984654	0.0978654	0.0989122	0.0988844	0.0994515	0.0989148	0.0991194	0.099968	0.0991812	0.0984952	0.0989867	0.0983942	0.0983942	0.0989567
YDR508C	0.0867493	0.0884561	0.0867688	0.0885521	0.0894569	0.0837441	0.0858277	0.0890836	0.0871242	0.0869344	0.0866991	0.0877449	0.0884477	0.0876957	0.0875213	0.0875776	0.0900876	0.087732	0.0887876	0.0876055	0.0890836	0.0885816	0.0881697
YDR510W	0.0748812	0.0746011	0.0736284	0.0736605	0.0730838	0.0730838	0.0731771	0.0796197	0.0763518	0.0761475	0.0734015	0.0730838	0.0728659	0.0725391	0.0726216	0.0763518	0.0730838	0.0713241	0.0730106	0.0730838	0.0730838	0.0730838	0.0730838
YDR511W	0.114925	0.114872	0.112355	0.114282	0.117426	0.116237	0.114854	0.114428	0.114508	0.113884	0.114601	0.114783	0.114594	0.114151	0.115684	0.116915	0.118133	0.115767	0.114428	0.114704	0.114428	0.114428	0.114938
YDR513W	0.0813657	0.0791171	0.0762603	0.0810185	0.0765076	0.0761785	0.076918	0.0787037	0.0763889	0.0810185	0.0773855	0.0807981	0.0805556	0.0801183	0.0779555	0.0763889	0.0763889	0.0779915	0.0810099	0.0810185	0.0810185	0.0810185	0.0810185
YDR514C	0.102687	0.103791	0.101067	0.102363	0.10097	0.102116	0.102025	0.101553	0.105329	0.103877	0.100663	0.10234	0.101553	0.101323	0.101504	0.100864	0.100849	0.102665	0.102393	0.102088	0.102241	0.102241	0.101623
YDR515W	0.130588	0.13823	0.131041	0.130702	0.133073	0.131888	0.129126	0.131689	0.129524	0.130937	0.131152	0.131515	0.130911	0.130595	0.131201	0.130959	0.132589	0.130954	0.130709	0.130433	0.131689	0.131689	0.130548
YDR516C	0.0733926	0.0721998	0.0729786	0.0726568	0.0731606	0.0733684	0.0726512	0.0731265	0.0749937	0.0730225	0.0724704	0.0725245	0.0725942	0.0724242	0.0726648	0.0724611	0.0735087	0.0731777	0.0725654	0.072572	0.0724611	0.0724611	0.0725123
YDR517W	0.112338	0.115622	0.112419	0.100652	0.111069	0.113176	0.112715	0.114199	0.110289	0.112522	0.112071	0.112921	0.112698	0.112275	0.112083	0.111602	0.11162	0.110803	0.112432	0.112179	0.111602	0.112468	0.11431
YDR518W	0.0995525	0.0995587	0.0992843	0.0778928	0.0983521	0.0981684	0.100035	0.0974611	0.101883	0.100176	0.0985425	0.0994835	0.0998206	0.0995704	0.0988675	0.0987481	0.0987207	0.0994906	0.0999463	0.100214	0.100035	0.0987481	0.100712
YDR523C	0.0851324	0.0848123	0.0838425	0.0751168	0.0851393	0.0856014	0.0855009	0.0848608	0.0869413	0.0841395	0.0840122	0.0855074	0.0843177	0.0842951	0.084758	0.0848608	0.0852075	0.0851742	0.0843061	0.0845968	0.0841819	0.0841819	0.0842342
YDR524C	0.10165	0.0983078	0.100213	0.0865727	0.0992293	0.0983123	0.0988895	0.100132	0.099731	0.1011	0.0996812	0.0995402	0.0997177	0.0994416	0.0983364	0.0973712	0.100499	0.0989638	0.100879	0.100975	0.100822	0.100822	0.101353
YDR527W	0.130534	0.13062	0.130227	0.131494	0.130842	0.130647	0.133591	0.132163	0.130379	0.130553	0.129427	0.130611	0.130597	0.130227	0.130096	0.130647	0.129148	0.130647	0.131125	0.131405	0.130647	0.131405	0.130745
YDR528W	0.114415	0.113325	0.112398	0.100932	0.113788	0.112707	0.114269	0.112922	0.114743	0.114838	0.111732	0.114007	0.11397	0.113009	0.112366	0.111349	0.114494	0.112015	0.11411	0.114373	0.11528	0.112922	0.112204
YDR529C	0.0844105	0.0872565	0.0847143	0.0859654	0.0852151	0.0859375	0.0852476	0.0868845	0.0842803	0.0843617	0.0838463	0.0842803	0.0851484	0.085293	0.0851484	0.0842803	0.0868845	0.0850816	0.0847953	0.0842803	0.0842803	0.0842803	0.0868845
YDR530C	0.119353	0.122165	0.120148	0.107805	0.121136	0.123908	0.118243	0.124466	0.124498	0.118043	0.118345	0.120522	0.121125	0.120716	0.121233	0.120376	0.122899	0.121949	0.120725	0.120773	0.120376	0.121398	0.120454
YDR531W	0.067801	0.0693021	0.0677996	0.0280869	0.0693694	0.0693545	0.0668422	0.0675676	0.0675438	0.068169	0.067389	0.0668734	0.0667431	0.0674265	0.068054	0.0675676	0.0695419	0.0687898	0.067015	0.0670853	0.0674857	0.0665848	0.0672547
YDR532C	0.115536	0.117584	0.116803	0.114881	0.11708	0.117444	0.115771	0.117522	0.116659	0.114824	0.115591	0.115836	0.115853	0.115843	0.116039	0.115795	0.117541	0.115795	0.116001	0.115795	0.116659	0.115795	0.11584
YDR533C	0.109205	0.109976	0.107914	0.0999093	0.107291	0.109753	0.108225	0.108225	0.109852	0.110195	0.106572	0.108492	0.108225	0.108381	0.108041	0.108225	0.107152	0.107902	0.108346	0.108225	0.110918	0.108225	0.108809
YEL001C	0.107717	0.112521	0.106955	0.107938	0.10955	0.109145	0.107727	0.109413	0.108985	0.108168	0.106545	0.106533	0.106463	0.1072	0.108178	0.109413	0.110605	0.108051	0.106567	0.106463	0.106463	0.106463	0.105026
YEL002C	0.0859004	0.0862069	0.0855683	0.085959	0.0858827	0.0858934	0.0871593	0.0858238	0.0875788	0.0857998	0.0853129	0.0858602	0.0857727	0.0857386	0.0857077	0.0858238	0.085677	0.0858238	0.0858381	0.0858238	0.0862953	0.0858238	0.0864329
YEL004W	0.115686	0.115769	0.115843	0.117107	0.116655	0.115735	0.116623	0.115735	0.116886	0.115492	0.115748	0.116336	0.116382	0.116382	0.116196	0.115735	0.117099	0.114838	0.11651	0.11676	0.116034	0.116706	0.115735
YEL005C	0.123103	0.122414	0.122733	0.123191	0.124059	0.124347	0.123054	0.124138	0.122989	0.123204	0.122334	0.123426	0.124215	0.12401	0.123406	0.122989	0.124138	0.123254	0.124112	0.123563	0.124845	0.124138	0.124138
YEL009C	0.0911607	0.0901175	0.0895052	0.0911988	0.0913072	0.0904808	0.0897894	0.0901595	0.0904255	0.0903068	0.0894888	0.0906083	0.0910233	0.0907485	0.0905641	0.0889817	0.0915379	0.0893441	0.0906254	0.0901595	0.0913374	0.0901595	0.0925455
YEL013W	0.0678364	0.0667426	0.0652553	0.069257	0.0663846	0.0666771	0.068005	0.0663108	0.0698021	0.0674262	0.0660469	0.0672977	0.0685368	0.067814	0.0666364	0.0663108	0.066323	0.0660008	0.0684997	0.0684537	0.0686136	0.0686136	0.068835
YEL015W	0.0856375	0.0861179	0.0822307	0.0844663	0.0837887	0.0847393	0.085084	0.0850669	0.0850669	0.0835192	0.0828563	0.0842089	0.0850669	0.084533	0.0842297	0.0838657	0.0849519	0.0830803	0.0849974	0.0849668	0.0850669	0.0850669	0.0844663
YEL016C	0.115814	0.116016	0.112706	0.116384	0.114436	NaN	0.115958	0.114955	0.117654	0.116544	0.113752	0.115116	0.11536	0.115443	0.114866	0.11563	0.114304	0.11371	0.115794	0.115293	0.115941	0.116305	0.115007
YEL018W	0.0991234	0.0983341	0.0970659	0.099427	0.0971251	0.0978355	0.0995671	0.0983766	0.101948	0.0994183	0.0984593	0.0996805	0.0997258	0.0991703	0.0981602	0.0995671	0.0977687	0.0984682	0.0995982	0.0996332	0.0995671	0.100758	0.0995671
YEL019C	0.114108	0.116859	0.110294	0.113534	0.115364	0.1156	0.113208	0.114478	0.116708	0.115944	0.112146	0.113244	0.113326	0.11489	0.11363	0.118182	0.114767	0.115143	0.113474	0.113724	0.113718	0.113244	0.113244
YEL020C	0.114706	0.118496	0.110682	0.114781	0.1162	0.115756	0.115152	0.114082	0.115826	0.115233	0.113554	0.114563	0.114676	0.114445	0.11434	0.117647	0.115548	0.115042	0.114705	0.114841	0.114676	0.11527	0.115316
YEL021W	0.0787935	0.0785884	0.0781886	0.0789568	0.0775667	0.0782451	0.0782419	0.0788105	0.0788105	0.0778777	0.0781713	0.078159	0.0789763	0.0787414	0.078622	0.0775667	0.0779107	0.0787148	0.0790008	0.0788105	0.0788105	0.0788105	0.0789062
YEL022W	0.0849124	0.0859353	0.0829819	0.0850927	0.0845419	0.0845568	0.0836164	0.0851195	0.0865801	0.085588	0.0835165	0.0849461	0.0846796	0.0849071	0.0843833	0.0850739	0.0846896	0.0845419	0.0848327	0.0849678	0.0849094	0.0851195	0.0852033
YEL023C	NaN	0.102799	NaN	0.101617	0.101672	0.102201	0.100636	0.101847	0.104251	0.101151	0.100162	0.102194	0.101749	0.101245	0.101297	0.101359	0.101847	0.101509	0.101458	0.101414	0.101359	0.101847	0.101898
YEL024W	0.0574074	0.0601852	0.057013	0.0593682	0.0602248	0.0604658	0.0572751	0.0601852	0.060235	0.0581115	0.0576132	0.0582745	0.0572016	0.0578704	0.0589226	0.058642	0.0615642	0.0610161	0.0577264	0.0582133	0.058642	0.058642	0.0586815
YEL025C	0.162429	0.161803	0.160002	0.162929	0.161291	0.162329	0.162541	0.160904	0.163052	0.161247	0.160531	0.16281	0.163124	0.162847	0.161302	0.161464	0.161374	0.159612	0.162812	0.162521	0.162303	0.162863	0.163293
YEL026W	0.0248031	0.0190289	0.0205599	0.0262467	0.0183727	0.0183727	0.0215973	0.0209974	0.0209974	0.0186188	0.0217629	0.0249969	0.0260717	0.023622	0.0205467	0.0183727	0.0184285	0.0189784	0.025757	0.0253718	0.023622	0.0262467	0.0262467
YEL027W	0.0186335	0.0184857	0.0186335	0.0186335	0.0186335	0.0188218	0.0186335	0.0186335	0.0207707	0.0186335	0.0176559	0.0190279	0.0186335	0.0187486	0.0186754	0.0186335	0.0186335	0.0186335	0.018649	0.0187486	0.0186335	0.0186335	0.0186866
YEL029C	0.0698761	0.0692295	0.0680716	0.0706748	0.0695006	0.0702488	0.0696707	0.0706748	0.0690258	0.0700092	0.0691661	0.0704719	0.0705328	0.070379	0.06947	0.0685449	0.0696552	0.0691183	0.0708298	0.0706156	0.0701014	0.0728047	0.0707021
YEL032W	0.0894095	0.0894583	0.0872514	0.0886604	0.0900691	0.0890443	0.088777	0.0886402	0.0905371	0.0893667	0.0877618	0.0888519	0.0885263	0.089476	0.0885401	0.0896659	0.0901169	0.0873253	0.0887908	0.0886782	0.0882984	0.0889821	0.0887893
YEL034W	0.0313291	0.0256932	0.02391	0.0254406	0.0232608	0.0255082	0.0238698	0.0253165	0.0286512	0.0274262	0.0245253	0.0264215	0.0253165	0.0264885	0.0254443	0.0253165	0.0268426	0.0253165	0.0257415	0.0255509	0.0274262	0.0274262	0.0253165
YEL038W	0.118686	0.121523	0.116783	0.120126	0.121268	0.121472	0.120287	0.121472	0.120826	0.114051	0.116922	0.119633	0.120423	0.119406	0.120475	0.121472	0.120224	0.121252	0.121131	0.120995	0.120042	0.120042	0.120115
YEL039C	0.0903509	0.0906433	0.0890188	0.0877193	0.0901185	0.0906433	0.0878028	0.0906433	0.0906433	0.0889072	0.087435	0.0878585	0.0877193	0.0883691	0.0893901	0.0906433	0.0905811	0.0906433	0.0877302	0.0877193	0.0877193	0.0877193	0.0877193
YEL043W	0.108826	0.109259	0.105534	0.109263	0.108925	0.108502	0.108476	0.107535	0.111544	0.108082	0.10533	0.108486	0.108511	0.108842	0.108075	0.107501	0.10901	0.107289	0.109148	0.109395	0.109222	0.109567	0.108887
YEL044W	0.126185	0.12386	0.125837	0.127535	0.130152	0.128164	0.126269	0.126381	0.127267	0.127178	0.125918	0.127315	0.126381	0.126926	0.127312	0.128342	0.12926	0.12427	0.126425	0.127253	0.128342	0.126381	0.126381
YEL046C	0.0697009	0.0730575	0.0689802	0.0705524	0.0717484	0.0720087	0.0695966	0.0723212	0.0742611	0.0703613	0.0680256	0.0711348	0.0702593	0.0705552	0.0710629	0.0706029	0.0716631	0.0722551	0.0707985	0.0707461	0.0697438	0.0706029	0.0712858
YEL047C	0.100926	0.101506	0.0993302	0.101763	0.10181	0.102554	0.100795	0.101139	0.101824	0.101028	0.0990255	0.100802	0.100573	0.101296	0.10101	0.100431	0.100461	0.100322	0.101258	0.101414	0.101846	0.101139	0.101375
YEL051W	0.0427003	0.0440568	0.0427649	0.0427649	0.0427649	0.0426474	0.0430971	0.0427649	0.0427649	0.0426437	0.0429802	0.043257	0.0427649	0.043052	0.0427257	0.0427649	0.0427649	0.0426655	0.0429143	0.0432673	0.0427649	0.0427649	0.0427649
YEL052W	0.0889394	0.0881271	0.0851885	0.0888644	0.0876213	0.0879917	0.0859095	0.0874034	0.0905449	0.0860963	0.0855697	0.0879014	0.0875342	0.0876213	0.0873568	0.0889117	0.0874869	0.0868001	0.0881131	0.0882749	0.0887106	0.088057	0.0882581
YEL053C	0.107301	0.107911	0.106875	0.107265	0.107808	0.107134	0.106864	0.107506	0.108809	0.107917	0.107209	0.107484	0.107112	0.107279	0.107464	0.10796	0.107361	0.107785	0.10718	0.10743	0.106597	0.107051	0.107214
YEL057C	0.127531	0.128065	0.124316	0.129078	0.123441	0.125725	0.127214	0.124823	0.12647	0.125784	0.126026	0.126174	0.128977	0.128605	0.126241	0.126241	0.12603	0.126896	0.129994	0.129393	0.129078	0.129078	0.127851
YEL058W	0.109214	0.11165	0.106968	0.109461	0.109546	0.108801	0.10929	0.109392	0.110536	0.109503	0.107674	0.109563	0.109077	0.109326	0.109094	0.10821	0.109417	0.110801	0.109394	0.109457	0.109392	0.109983	0.109589
YEL060C	0.0933692	0.0930108	0.0921749	0.0928978	0.0932832	0.0938835	0.0936801	0.0930876	0.0931553	0.0935708	0.0922711	0.0940409	0.0944018	0.0931388	0.0930186	0.0921147	0.0932259	0.0934539	0.094971	0.0945895	0.0951081	0.0956989	0.0954025
YEL061C	0.0973054	0.0970797	0.0957692	0.0913076	0.0960813	0.0981371	0.0964357	0.0971391	0.0972678	0.0972118	0.0945193	0.0966955	0.0965624	0.0966216	0.0961847	0.0981371	0.0963605	0.0970111	0.0965879	0.0968249	0.0968064	0.0961411	0.0968405
YEL063C	0.082019	0.0839925	0.0825255	0.0629754	0.0832903	0.0826215	0.0811122	0.0822148	0.0833514	0.0846791	0.0816011	0.0831735	0.0815436	0.0819041	0.0825029	0.082774	0.0833452	0.0816555	0.0817786	0.0816866	0.0822148	0.0822148	0.0817845
YEL064C	0.116022	0.11738	0.114767	0.114981	0.116182	0.116829	0.1143	0.115953	0.117086	0.117459	0.114805	0.116084	0.115815	0.115762	0.116113	0.115953	0.116539	0.116642	0.115943	0.1158	0.115953	0.115953	0.116218
YEL065W	0.0926228	0.0938152	0.0920172	0.0686447	0.0951424	0.0944549	0.0928348	0.0951968	0.0942737	0.0969522	0.0939912	0.0929509	0.0927237	0.0937836	0.0939361	0.0925471	0.0953434	0.0934032	0.0931719	0.093342	0.0930363	0.093077	0.0929819
YER001W	0.118743	0.118353	0.118401	0.120567	0.118088	0.118241	0.118528	0.117337	0.116946	0.118536	0.117085	0.119066	0.119527	0.119426	0.117696	0.116904	0.118568	0.11726	0.120002	0.120123	0.120529	0.119498	0.118656
YER004W	0.110208	0.107591	0.105378	0.111285	0.106054	0.108542	0.109315	0.108268	0.107021	0.110432	0.106037	0.107112	0.109848	0.109689	0.107077	0.111285	0.105599	0.109738	0.109956	0.110407	0.109848	0.109848	0.109996
YER005W	0.0958892	0.0959516	0.094052	0.095768	0.0954787	0.0946768	0.0948402	0.0955194	0.0950252	0.0953543	0.0935457	0.0951672	0.0955898	0.0954313	0.0950658	0.0949911	0.095687	0.0945848	0.0954445	0.0955194	0.0957226	0.0955194	0.0964811
YER006W	0.0734979	0.0734705	0.0730821	0.073402	0.0735004	0.0732856	0.0720559	0.073402	0.073402	0.0727022	0.0730821	0.0739504	0.0734873	0.0732953	0.0731693	0.0727622	0.0735245	0.0728606	0.0734988	0.073402	0.0735988	0.073402	0.0734676
YER008C	0.111112	0.110974	0.109644	0.104947	0.111345	0.111502	0.11006	0.110938	0.110155	0.111395	0.110026	0.110632	0.11041	0.11087	0.110741	0.109699	0.111402	0.109585	0.110638	0.110374	0.110862	0.110195	0.111701
YER009W	0.0465608	0.0483749	0.0473251	NaN	0.047619	0.047619	0.0473923	0.047619	0.047619	0.0478671	0.047619	0.0473671	0.0474427	0.047619	0.0475923	0.047619	0.0482945	0.047619	0.047619	0.047619	0.047619	0.047619	0.047619
YER010C	0.12014	0.122198	0.118751	0.107964	0.118552	0.120056	0.121946	0.119928	0.122753	0.117986	0.119163	0.119323	0.120116	0.120007	0.119186	0.118516	0.118516	0.118516	0.120265	0.12087	0.121341	0.119928	0.119928
YER012W	0.0700853	0.067154	0.0678984	0.0581876	0.0682277	0.0670017	0.0674368	0.067154	0.0701995	0.0687243	0.0676192	0.0680241	0.0689305	0.0692943	0.0684337	0.068829	0.0675816	0.067154	0.0690227	0.0684568	0.0694732	0.068829	0.068829
YER013W	0.0911801	0.0911672	0.09045	0.0919233	0.0916497	0.0917093	0.0916466	0.0910381	0.0947109	0.0901775	0.0893385	0.0907272	0.0917764	0.0916849	0.0910671	0.0913221	0.0915939	0.0909071	0.0915932	0.091748	0.0918899	0.0913221	0.0923195
YER014W	0.11571	0.116468	0.114506	0.116703	0.116097	0.117059	0.114974	0.117284	0.117284	0.113792	0.114138	0.116167	0.116379	0.116152	0.115625	0.114957	0.11731	0.114387	0.116079	0.116255	0.116049	0.116049	0.116018
YER015W	0.102004	0.101571	NaN	0.10235	0.101855	0.101775	0.10183	0.101855	0.104905	0.101302	0.10065	0.101708	0.102504	0.101806	0.101806	0.102741	0.102175	0.101378	0.102412	0.102372	0.102434	0.102298	0.102491
YER016W	0.0906105	0.0933434	0.0910506	0.0929293	0.0929045	0.0935441	0.092322	0.0958278	0.0929293	0.0920839	0.0913324	0.0926532	0.0925428	0.0916947	0.0925292	0.0929293	0.0935049	0.0936725	0.092731	0.0925536	0.0929293	0.0929293	0.0938459
YER018C	0.109412	0.106889	0.10967	0.113399	0.110299	0.110156	0.109894	0.106334	0.108659	0.108755	0.110984	0.110695	0.110438	0.111172	0.109968	0.104832	0.110583	0.108686	0.111174	0.111339	0.110838	0.110838	0.110915
YER020W	0.0993521	0.101675	0.0991125	0.101272	0.0988923	NaN	0.0981564	0.099681	0.0981955	0.0978992	0.0965743	0.0995766	0.0997298	0.100128	0.098758	0.099681	0.0999143	0.0990063	0.100352	0.100493	0.100412	0.100412	0.101162
YER022W	0.0975914	0.0992379	0.0964469	0.0988883	0.100011	0.0994265	0.0972132	0.0988218	0.100928	0.0973286	0.0968599	0.0981489	0.0978711	0.0982952	0.0989887	0.0983436	0.100389	0.0978386	0.0983213	0.0983991	0.0982131	0.0982131	0.0986914
YER024W	0.102453	0.104265	0.102263	0.103167	0.10204	0.102984	0.101725	0.101283	0.103215	0.102081	0.101163	0.102123	0.102651	0.102543	0.102141	0.102003	0.102535	0.101532	0.102896	0.102883	0.102667	0.102723	0.102981
YER025W	0.0504908	0.0510737	0.0499851	0.05026	0.0503821	0.0502197	0.0501186	0.0503338	0.0516096	0.0503535	0.0499938	0.0506627	0.0502501	0.0504036	0.0503021	0.0503338	0.0510017	0.0497544	0.0503526	0.0503338	0.0503338	0.0503338	0.0504948
YER026C	0.075763	0.0766484	NaN	0.0744995	0.0759553	0.0762001	0.0726991	0.0757029	0.0732961	0.0746936	0.072778	0.0747287	0.0748204	0.0747669	0.0744332	0.0757029	0.07618	0.0763508	0.0750832	0.0751012	0.0744995	0.0757029	0.0752709
YER027C	0.0818613	0.079407	0.0799098	0.0795845	0.0816587	0.0800661	0.0791756	0.0802815	0.0851227	0.0798372	0.079733	0.0797173	0.0794916	0.0796751	0.0802039	0.0810714	0.0804129	0.0785802	0.0795948	0.0795794	0.0794916	0.0794916	0.0796739
YER029C	0.0982234	0.0964467	0.0977627	0.0964467	0.0963165	0.0936779	0.0961083	0.0947547	0.0964467	0.0954949	0.0960942	0.0966078	0.0970107	0.0965407	0.0960878	0.0947547	0.0948627	0.095015	0.0965414	0.0965407	0.0964467	0.0964467	0.0972276
YER031C	0.0676339	0.0679634	0.0678571	0.0678571	0.0684295	0.0678571	0.0678571	0.0678571	0.0678571	0.0667876	0.0678778	0.0678571	0.0673611	0.0673611	0.0678571	0.0678571	0.0678571	0.0676282	0.0674407	0.0672784	0.0678571	0.0678571	0.0678571
YER034W	0.153974	0.155034	NaN	0.149611	0.156861	0.154847	0.1538	0.154847	0.153102	0.151084	0.148203	0.152437	0.154731	0.154944	0.153542	0.154847	0.156592	0.154578	0.15415	0.15349	0.158337	0.154847	0.150685
YER035W	0.13516	0.132502	0.135591	0.139269	0.130898	0.134496	0.134638	0.136986	0.134703	0.137129	0.132927	0.136769	0.137747	0.134576	0.134242	0.13242	0.133732	0.134703	0.137591	0.138001	0.136986	0.136986	0.137103
YER036C	0.0612398	0.0608696	0.0612277	0.059875	0.0599155	0.0612498	0.0590145	0.0608041	0.0610677	0.0592042	0.0589583	0.060026	0.0592064	0.0598358	0.0597808	0.0608041	0.0603406	0.0606784	0.0587108	0.0586255	0.0586255	0.0586255	0.0590863
YER037W	0.0835578	0.0845599	0.0845679	0.0838384	0.0833463	0.0835629	0.0833036	0.0848485	0.0868687	0.0839015	0.0833614	0.084127	0.083771	0.0840629	0.0837261	0.0828283	0.0838169	0.0848485	0.08391	0.0838945	0.0838384	0.0838384	0.083942
YER040W	0.080774	0.0809509	0.0811681	0.0824565	0.0805718	0.0803849	0.0808319	0.0796478	0.0824668	0.0815059	0.0795039	0.0824792	0.0819601	0.081825	0.0808399	0.0809992	0.0806542	0.0810338	0.082369	0.0824006	0.0823505	0.0823505	0.0819347
YER041W	0.138806	0.139414	0.138121	0.138925	0.140311	0.140647	0.138201	0.138976	0.140416	0.138566	0.137725	0.13958	0.139268	0.139681	0.139087	0.138539	0.141071	0.138101	0.1391	0.139122	0.138976	0.138539	0.139091
YER042W	0.100066	0.0983795	0.100246	0.0988679	0.0979357	0.0977887	0.0996794	0.0984439	0.0984439	0.100584	0.0990195	0.100332	0.100246	0.0996451	0.0985925	0.100246	0.0975622	0.0987211	0.10036	0.100446	0.100246	0.100246	0.100246
YER043C	0.0567273	0.0562987	0.0551964	0.0571717	0.0573427	0.0563636	0.0568331	0.0571717	0.0556902	0.0561532	0.0560297	0.0570306	0.0572211	0.0573775	0.0567602	0.0556902	0.0571087	0.0572287	0.0574288	0.0571717	0.0571717	0.0579125	0.0571717
YER044C	0.0569148	0.0583689	0.0583689	0.0586321	0.0584836	0.0583689	0.0584328	0.0583689	0.0584411	0.0584388	0.0583689	0.0583689	0.0583689	0.0583689	0.0583915	0.0583689	0.0595113	0.0583689	0.0584107	0.0584932	0.0583689	0.0583689	0.058541
YER045C	NaN	0.154496	NaN	0.155955	0.154491	0.154539	0.153713	0.154781	0.156584	NaN	0.152797	0.156239	0.155979	0.156297	0.154617	0.154116	0.15413	0.153553	0.156003	0.156223	0.155447	0.156112	0.155242
YER046W	0.106713	0.102431	0.103138	0.106481	0.101971	0.100168	0.103902	0.101852	0.099537	0.101997	0.101627	0.10593	0.106019	0.105453	0.102694	0.099537	0.102	0.100605	0.10662	0.106481	0.108796	0.106385	0.107312
YER048C	0.0806973	0.0836978	0.0808957	0.0807823	0.0828537	0.0834879	0.0808309	0.082483	0.0841288	0.0819515	0.0809004	0.0808228	0.080839	0.0813492	0.0814952	0.082483	0.082483	0.0822213	0.0808458	0.0807823	0.0807823	0.0807823	0.0821123
YER049W	0.0843928	0.0847914	0.0847545	0.0853017	0.0837481	0.0854123	0.0845417	0.0832041	0.0857881	0.0837371	0.0836922	0.0852221	0.0850646	0.0850585	0.0842638	0.0863447	0.0837429	0.0834824	0.0853504	0.0853575	0.0857484	0.0852713	0.0853376
YER051W	0.121618	0.123458	0.120235	0.121212	0.120848	0.122011	0.120961	0.124593	0.121125	0.121022	0.118771	0.12147	0.120446	0.120912	0.1207	0.121888	0.121903	0.123032	0.121341	0.121437	0.121212	0.12124	0.12149
YER052C	0.0662546	0.0658224	0.0670211	0.0681308	0.0655378	0.0665188	0.066899	0.065666	0.0656257	0.0659006	0.0657268	0.0675124	0.0663748	0.0662914	0.0660451	0.065666	0.0650939	0.0659547	0.0675025	0.0674727	0.0675422	0.0675422	0.0679591
YER054C	0.103154	0.103971	0.104677	0.105697	0.105871	0.104493	0.103225	0.104878	0.103714	0.10398	0.103971	0.104965	0.104273	0.104139	0.103548	0.103063	0.106384	0.103901	0.104874	0.104744	0.105437	0.104324	0.105204
YER055C	0.0958613	0.0932407	0.0960104	0.0950783	0.0948202	0.093553	0.0963247	0.0939597	0.0982897	0.096127	0.0949385	0.0953979	0.0946309	0.0948297	0.09431	0.0939597	0.0937931	0.0947341	0.095787	0.0955133	0.0961969	0.0961969	0.0962255
YER057C	0.0861538	0.0873626	0.0871795	0.0898944	0.0879684	0.0878788	0.0871795	0.0871795	0.0871795	0.0872596	0.0871795	0.0876679	0.0871795	0.0871795	0.0871795	0.0871795	0.0871795	0.0871795	0.086969	0.0871795	0.0871795	0.0871795	0.0871795
YER058W	0.0927469	0.0913801	0.0925926	0.0925926	0.0925926	0.0925926	0.0928571	0.0895062	0.0989646	0.0949074	0.0928498	0.0930335	0.0934156	0.0941358	0.0927485	0.0925926	0.0925926	0.0925926	0.0927423	0.0925926	0.095679	0.0925926	0.0917221
YER059W	0.0978048	0.0967029	0.0965429	0.0854206	0.0975335	0.0975335	0.0975335	0.0975335	0.0980336	0.0976788	0.0973504	0.0975704	0.0976885	0.0977057	0.0972608	0.0959831	0.0979128	0.0980701	0.0979029	0.0980933	0.0975335	0.0983087	0.0981298
YER061C	0.116065	0.111663	0.113084	0.107865	0.112029	0.112484	0.113555	0.113168	0.114309	0.114579	0.111537	0.115174	0.114322	0.113628	0.11275	0.113168	0.112479	0.11392	0.114816	0.114773	0.114673	0.11392	0.114711
YER062C	0.0786189	0.0754126	0.077763	0.0672604	0.0748235	0.0744899	0.0773667	0.0756972	0.0797241	0.0786023	0.0754759	0.0790489	0.0784418	0.0773941	0.0760192	0.0770252	0.0750756	0.0790683	0.0785267	0.0776892	0.0792727	0.0783533	0.0784554
YER063W	0.136012	0.13331	0.135751	0.135553	0.136982	0.136226	0.136218	0.137603	0.134573	0.135189	0.134426	0.136738	0.135583	0.135583	0.135292	0.136088	0.137507	0.135156	0.136173	0.136004	0.136438	0.136088	0.137603
YER064C	0.137989	0.137093	0.136867	0.13772	0.13633	0.135765	0.137192	0.136364	0.137129	0.135849	0.135641	0.137242	0.137505	0.137352	0.136616	0.135046	0.13677	0.136566	0.137479	0.137718	0.137681	0.137681	0.137022
YER065C	0.0803356	0.0812658	0.0803887	0.0690895	0.0807844	0.0806995	0.0807708	0.0789617	0.0803106	0.079783	0.0804302	0.0807253	0.080714	0.0808201	0.0804702	0.0801564	0.0813003	0.0806159	0.080863	0.0808865	0.0807538	0.0807538	0.0808304
YER067W	0.077572	0.077234	0.0776177	0.0518364	0.0764482	0.0783764	0.0781893	0.0781893	0.0806452	0.0780607	0.078075	0.0783853	0.0781893	0.0786465	0.0777904	0.0781893	0.0762192	0.0753403	0.078243	0.0781893	0.0781893	0.0781893	0.0781893
YER068W	0.0891252	0.0891742	0.0887279	0.0853146	0.0897698	0.0895782	0.0894832	0.0898853	0.0887955	0.0883849	0.0882353	0.0886788	0.0894349	0.0891346	0.0888275	0.0904484	0.0903286	0.0897987	0.0895534	0.0895725	0.0898853	0.0893223	0.0895533
YER069W	0.0982393	0.0987341	0.0981692	0.0987819	0.100118	0.10087	0.0982464	0.100484	0.0996004	0.0987358	0.0977995	0.0983162	0.0979892	0.0984264	0.0984926	0.0993266	0.0999012	0.0973086	0.0982297	0.0981692	0.0981692	0.098555	0.0991782
YER070W	0.0716117	0.0712269	0.0708469	0.0721355	0.0708789	0.0707751	0.0713873	0.0713873	0.0721476	0.0708027	0.0705143	0.0720108	0.0717364	0.0721355	0.0707864	NaN	0.0708699	0.0710995	0.0721955	0.0720524	0.0721355	0.0721355	0.0725384
YER072W	0.0541026	0.0543956	0.0538462	0.0410256	0.0570677	0.0547786	0.0542125	0.0538462	0.0589744	0.0538462	0.0538462	0.0539683	0.0538462	0.0539886	0.0544678	0.0538462	0.0564648	0.0538462	0.0538557	0.0538462	0.0538462	0.0538462	0.0539119
YER073W	0.0873854	0.0847653	0.0858037	0.0755212	0.0845678	0.0866438	0.0856838	0.085306	0.0886082	0.0860658	0.0873054	0.0866161	0.0864292	0.0862776	0.0851488	0.0865856	0.0850338	0.0866184	0.0875095	0.0875809	0.0878652	0.0872254	0.0872254
YER078C	0.0911665	0.0910782	0.090577	0.0915706	0.0924327	0.0915009	0.0905946	0.0919152	0.0937424	0.092017	0.0904685	0.0914812	0.0918718	0.0908302	0.0917771	0.0919152	0.0934251	0.0909136	0.0915144	0.0916259	0.0912642	0.0919152	0.0914979
YER079W	0.0855814	0.0864895	0.085702	0.0853625	0.0853906	0.0876674	0.0854485	0.0852713	0.0867717	0.0852229	0.085379	0.0863787	0.0858915	0.0852713	0.0858194	0.0852713	0.0854363	0.0861061	0.08563	0.0854436	0.0852713	0.0852713	0.0870205
YER080W	0.0962575	0.0954467	0.0937415	0.0970818	0.0974209	0.0954569	0.0958582	0.0948825	0.0984458	0.0966104	0.0949337	0.0968384	0.0965676	0.0949702	0.0957548	0.0969888	0.0973586	0.0960977	0.0970791	0.0972521	0.0975154	0.0975154	0.097745
YER081W	0.0736525	0.0746454	0.0741923	0.0747184	0.0754137	0.0752418	0.074772	0.077305	0.0737589	0.0736924	0.0742317	0.0746032	0.0743735	0.0743105	0.0745111	0.077305	0.0751622	0.0741953	0.0745845	0.0744681	0.0744681	0.0744681	0.0745408
YER083C	0.117732	0.117473	0.115679	0.116974	0.117661	0.118139	0.116141	0.118139	0.118515	0.117083	0.116683	0.117085	0.117285	0.116909	0.116315	0.116974	0.117693	0.11545	0.117252	0.117492	0.116974	0.118139	0.118468
YER086W	0.0603067	0.0592462	0.0597483	0.060983	0.0595853	0.0596607	0.0598198	0.0584003	0.0601334	0.0604403	0.060326	0.0604635	0.0602104	0.060326	0.0596957	0.0601334	0.0600351	0.0602667	0.0607671	0.0608074	0.0607111	0.0607111	0.0616591
YER087W	0.0968568	0.09527	0.0962718	0.0969023	0.0948695	0.0949339	0.0953071	0.0959508	0.0988393	0.0969438	0.0967853	0.0972438	0.0958353	0.0961113	0.0951981	0.0947954	0.0942669	0.0952843	0.0965005	0.0965285	0.0965285	0.0971062	0.0965285
YER088C	0.0978932	0.09938	0.0999477	0.0997181	0.0986976	0.0993994	0.09674	0.0983155	0.097995	0.0975859	0.0969494	0.0990488	0.0983155	0.0975979	0.0980295	0.0983155	0.0984883	0.0965959	0.0993313	0.099447	0.0992326	0.0998058	0.0983282
YER089C	0.0799177	0.0794141	0.0783315	NaN	0.0786152	NaN	0.0784912	0.0784505	0.0794175	0.0788743	0.0777367	0.0786544	0.0780936	0.0782918	0.078134	NaN	0.0794528	0.0777916	0.0784358	0.0785694	0.0777367	NaN	0.0784505
YER090W	0.0925302	0.0937087	0.0922214	0.093611	0.0936011	0.0940706	0.0928588	0.0928776	0.0937243	0.0934928	0.0919845	0.0929713	0.093315	0.092987	0.0930503	0.0935338	0.0928916	0.0922719	0.0935558	0.0935338	0.0935338	0.0935338	0.0943918
YER091C	0.0643229	0.0646577	0.0638792	0.0650863	0.0650162	0.064824	0.0646639	0.0654948	0.0640807	0.0643148	0.0640299	0.0647301	0.0647135	0.0649161	0.0645391	0.0646267	0.0655964	0.064393	0.0646397	0.0646267	0.0650608	0.0646267	0.0646267
YER092W	0.134127	0.132842	0.132128	0.135076	0.132275	0.130592	0.134316	0.132275	0.132275	0.136822	0.131283	0.133913	0.134039	0.134333	0.132168	0.132275	0.132275	0.132275	0.134881	0.134921	0.134921	0.134921	0.134988
YER096W	0.119828	0.118947	0.118582	0.120855	0.119688	0.119192	0.119413	0.11954	0.121683	0.11954	0.118911	0.120088	0.120392	0.11954	0.119351	0.120817	0.119051	0.11846	0.120348	0.120392	0.120228	0.120179	0.119671
YER098W	0.124274	0.123126	0.121902	0.122863	0.124506	0.124855	0.122268	0.122733	0.123685	0.122499	0.122421	0.123237	0.123203	0.123492	0.122885	0.124224	0.125825	0.122395	0.123272	0.123174	0.123614	0.123174	0.12358
YER099C	0.089071	0.0880932	0.0876734	0.0889142	0.0881908	0.0884393	0.0884664	0.0878693	0.0889479	0.0892734	0.0879564	0.0891133	0.0888446	0.088682	0.0882387	0.0889142	0.0878693	0.08803	0.089	0.0889142	0.0889142	0.0889142	0.0889142
YER100W	0.0853254	0.088266	0.0876494	0.0876494	0.0879899	0.0897018	0.0876873	0.0876494	0.0877779	0.0868194	0.0877232	0.0877126	0.0875609	0.0878707	0.0880116	0.0916335	0.0876494	0.0871386	0.0876841	0.0876494	0.0876494	0.0876494	0.0876494
YER101C	0.101444	0.100974	0.100799	0.101148	0.10074	0.100776	0.100438	0.104924	0.101556	0.100742	0.100359	0.10183	0.101418	0.101057	0.100899	0.10183	0.101797	0.100997	0.101937	0.10183	0.10183	0.10183	0.10191
YER103W	0.0893209	0.0892468	0.0881113	0.0896716	0.0886629	0.0887318	0.088647	0.0890617	0.0886938	0.0880265	0.0888241	0.0889136	0.0892345	0.0890041	0.0889936	0.0885433	0.0896463	0.0885832	0.0894155	0.0894937	0.0900985	0.0895801	0.0895535
YER105C	0.130277	0.129452	0.126351	0.130336	0.129101	0.129392	0.127526	0.130016	0.130681	0.12779	0.126824	0.129659	0.130039	0.128386	0.128976	0.129231	0.129792	0.127713	0.130439	0.130459	0.130182	0.130895	0.130188
YER107C	0.0828324	0.0832032	0.0821696	0.0821279	0.0823175	0.0822156	0.0825917	0.0819672	0.0816734	0.0817111	0.0820684	0.0820973	0.0819672	0.0814106	0.0823352	0.0819672	0.0830524	0.0821774	0.0823614	0.0824732	0.0819672	0.0819672	0.0819672
YER111C	0.0976297	0.0969418	0.0962698	0.0985127	0.0972127	0.0969534	0.0961411	0.0963029	0.0980534	0.0981477	0.0960917	0.096814	0.0976943	0.0969489	0.0968269	0.0963029	0.0969119	0.0963259	0.0980429	0.0979759	0.0977937	0.09839	0.0981071
YER113C	0.0886117	0.0874633	0.0865372	0.0879517	0.0866098	0.0868673	0.0873589	0.0865372	0.0886872	0.0875244	0.0864455	0.0877496	0.0888946	0.087454	0.0872468	0.0865372	0.086788	0.0868999	0.0890638	0.089078	0.0893298	0.0888946	0.0891303
YER114C	0.116913	0.116546	0.115562	0.116626	0.116814	0.116597	0.115668	0.116371	0.117697	0.116287	0.115336	0.116216	0.116626	0.115668	0.11627	0.115987	0.117006	0.116258	0.116701	0.117247	0.116921	0.117265	0.11778
YER116C	0.162848	0.163593	0.161684	0.162424	0.161927	0.161763	0.160346	0.162424	0.159844	0.162689	0.161532	0.162367	0.162667	0.161751	0.161849	0.162424	0.161418	0.162051	0.162564	0.162424	0.162424	0.162424	0.16289
YER118C	0.0847518	0.085233	0.0842691	0.0843763	0.0844017	0.0845422	0.0845998	0.0851064	0.0853924	0.0844692	0.0842199	0.0843465	0.0842199	0.0845154	0.0846049	0.0851064	0.0855402	0.0834697	0.0843522	0.0842199	0.0851064	0.0851064	0.0842199
YER119C	0.0986266	0.0986584	0.0987379	0.0991746	0.0990806	0.0998853	0.0990349	0.0987379	0.0974447	0.100084	0.0983564	0.0997985	0.100173	0.0989029	0.0991354	0.0987379	0.0980587	0.0984524	0.100353	0.10014	0.100223	0.100223	0.0979955
YER120W	0.0614054	0.0615179	0.0619449	0.0618763	0.0621356	0.0631114	0.0614616	0.0644238	0.0623494	0.0623322	0.0615621	0.0622365	0.062674	0.0620178	0.0625944	0.0617991	0.0631114	0.0638181	0.062039	0.0620907	0.0631114	0.0617991	0.0619337
YER122C	0.0812459	0.0823393	0.0799647	0.0831482	0.0811711	0.0809687	0.0815299	0.0801856	0.0837769	0.0817802	0.0799555	0.0816372	0.0821736	0.0820632	0.0814909	0.0815109	0.0817365	0.0805424	0.0822626	0.0824682	0.0828363	0.0828363	0.0815279
YER123W	0.0776132	0.0764314	0.076961	0.0773503	0.0772481	0.0774283	0.0768785	0.0760456	0.0791938	0.077115	0.0771282	0.0778864	0.0773553	0.0774187	0.0770186	0.0766793	0.0773131	0.0767281	0.0771357	0.0772426	0.0779468	0.0785805	0.0767606
YER124C	0.104733	0.108266	0.104013	0.106272	0.104798	0.105163	0.105923	0.107433	0.106272	0.10629	0.10411	0.105995	0.106659	0.106014	0.10514	0.105691	0.103974	0.107121	0.106551	0.106562	0.106272	0.106852	0.10782
YER125W	0.0673724	0.067253	0.0666547	0.0686536	0.0666843	0.0669778	0.0671948	0.0669038	0.0687046	0.0677952	0.0666378	0.0676217	0.0683979	0.06833	0.0668667	0.0664963	0.066557	0.0670605	0.0687588	0.0686922	0.0684397	0.0689412	0.0689935
YER126C	0.0595825	0.0610728	0.0589675	0.0587555	0.0590817	0.0593338	0.0590463	0.0587555	0.0593711	0.0587555	0.0587555	0.0587555	0.0587555	0.0588969	0.0588069	0.0587555	0.0587555	0.059832	0.058765	0.0587555	0.0587555	0.0587555	0.0597015
YER127W	0.0875333	0.0857476	0.0855441	0.0884948	0.0850005	0.0854978	0.0856429	0.0848318	0.0888493	0.0852897	0.0852831	0.0867506	0.0881285	0.0877317	0.0857938	0.0866633	0.0851241	0.0853954	0.0884225	0.0886983	0.0884948	0.0884948	0.088847
YER128W	0.112114	0.110801	0.111834	0.112291	0.111111	0.113969	0.11122	0.110569	0.111723	0.112398	0.112556	0.112815	0.112304	0.112827	0.111374	0.110569	0.110604	0.110819	0.112426	0.112195	0.112195	0.112195	0.112779
YER130C	0.123254	0.12455	0.12267	0.123618	0.123221	0.12383	0.12165	0.12167	0.12383	0.122143	0.12166	0.123487	0.123494	0.12359	0.122754	0.12383	0.123815	0.123664	0.123855	0.12379	0.12383	0.12383	0.124624
YER132C	0.118661	0.118312	0.117501	0.119718	0.119051	0.118954	0.117867	0.119506	0.122292	0.119025	0.116866	0.118641	0.119202	0.118968	0.118083	0.118746	0.119357	0.11841	0.119201	0.11939	0.119316	0.119126	0.11897
YER136W	0.0691874	0.0712945	0.069761	0.0694477	0.0707758	0.0712658	0.070241	0.0721373	0.0714474	0.0696023	0.0690748	0.0697844	0.0691383	0.0697201	0.0702913	0.0706624	0.0713371	0.0695845	0.0692012	0.0691874	0.0691874	0.0691874	0.0699816
YER139C	0.0756975	0.0752045	0.075053	0.0762719	0.0787304	0.0755573	0.0751416	0.0778267	0.0748899	0.0757159	0.075257	0.0751696	0.0752814	0.076032	0.0756315	0.0748899	0.0785453	0.0740992	0.0760186	0.0758688	0.0763583	0.0763583	0.0749275
YER140W	0.102399	0.102899	0.101914	0.10235	0.10228	0.103041	0.101288	0.10228	0.104461	0.102298	0.101149	0.102906	0.102319	0.102512	0.10275	0.102878	0.103005	0.102556	0.102378	0.102313	0.10228	0.10228	0.102617
YER141W	0.100684	0.0998338	0.0993992	0.100737	0.10109	0.101176	0.0998924	0.0985626	0.101212	0.100873	0.0997319	0.100942	0.100388	0.100578	0.100263	0.100616	0.100936	0.100721	0.100616	0.100274	0.100616	0.100616	0.101152
YER143W	0.101748	0.101759	0.101658	0.104164	0.102205	0.102847	0.103252	0.102564	0.103391	0.102273	0.102078	0.103563	0.103445	0.103427	0.102619	0.101787	0.103754	0.101847	0.104112	0.104204	0.104118	0.104118	0.104437
YER144C	0.130873	0.131602	0.128504	0.130735	0.131058	0.131326	0.131041	0.130562	0.132968	0.130467	0.128958	0.131139	0.130852	0.130985	0.130018	0.132341	0.1322	0.129032	0.131049	0.131146	0.131514	0.130687	0.130771
YER145C	0.0670782	0.0674897	0.0670325	0.0669087	0.0688826	0.0674897	0.0676892	0.0691358	0.0677287	0.066821	0.066861	0.0682736	0.0672154	0.0681299	0.0674315	0.0666667	0.0692234	0.067743	0.0669431	0.0673068	0.0658436	0.0658436	0.0675319
YER146W	0.0985816	0.095998	0.0941686	0.0957447	0.0921986	0.0921986	0.093617	0.0921986	0.0921986	0.0934176	0.0932821	0.0940561	0.0964539	0.0947597	0.0934164	0.0921986	0.0921986	0.0946536	0.0953477	0.0957447	0.0957447	0.0957447	0.102382
YER147C	0.112807	0.113469	0.11144	0.113442	0.113613	0.1124	0.111944	0.112762	0.112256	0.113299	0.111689	0.112469	0.112833	0.113019	0.112426	0.114034	0.113694	0.112096	0.112442	0.112326	0.112974	0.111914	0.112675
YER148W	0.0598202	0.0600672	0.0587828	0.0594744	0.0596517	0.0604803	0.0594349	0.0622407	0.0589836	0.0605982	0.0585139	0.0594085	0.05929	0.0597818	0.0595443	0.0594744	0.0594744	0.0596872	0.0595002	0.0594744	0.0594744	0.0594744	0.0596872
YER149C	0.127597	0.127495	0.126866	0.127881	0.127509	0.126826	0.126499	0.127834	0.128038	0.126696	0.126119	0.12791	0.12699	0.127702	0.126914	0.127042	0.126992	0.127225	0.127106	0.127218	0.127042	0.126251	0.129418
YER150W	0.110565	0.112787	0.111721	0.112599	0.112008	0.110637	0.110422	0.112467	0.111673	0.111908	0.111162	0.11236	0.111423	0.11197	0.111699	0.112467	0.111325	0.111434	0.112258	0.112218	0.112467	0.112467	0.112467
YER154W	0.086232	0.0884948	0.0858461	0.0873706	0.0853583	0.0870742	0.086752	0.0880517	NaN	0.0857254	0.0844445	0.0878036	0.087776	0.0867191	0.0857709	0.0847432	0.0864855	0.0875427	0.0874129	0.0873165	0.0872246	0.0880517	0.08767
YER155C	0.0936196	0.0938295	0.0928295	0.0942099	0.0934099	0.0933663	0.0927821	0.0931019	0.0934708	0.093455	0.0931954	0.094027	0.0939495	0.0940646	0.0933048	0.0937262	0.0935707	0.0936208	0.0941944	0.0942	0.0944876	0.094183	0.0941284
YER157W	0.11449	0.11604	0.114203	0.116196	0.115607	0.115964	0.11582	0.117585	0.116337	0.115573	0.114928	0.115311	0.114965	0.116157	0.115649	0.115242	0.117137	0.116073	0.115676	0.115658	0.116073	0.115242	0.115658
YER159C	0.0996609	0.101709	0.0981846	0.0989616	0.101532	0.104047	0.0983622	0.105955	0.0989616	0.0991073	0.097699	0.0981846	0.0978738	0.101163	0.100233	0.105955	0.101293	0.102189	0.0982136	0.0989616	0.0987823	0.0989616	0.0989019
YER161C	0.0931228	0.0962879	0.0944424	0.0956589	0.0945661	0.0951733	0.0943775	0.0947197	0.0957177	0.0959672	0.0943593	0.0960978	0.0963165	0.0961058	0.0945382	0.0957177	0.0940402	0.0937984	0.0970955	0.0967157	0.0977137	0.0977137	0.0976625
YER162C	0.110944	0.110756	0.111831	0.103518	0.112406	0.112537	0.111223	0.114176	0.112062	0.112513	0.111916	0.112689	0.112681	0.112295	0.112017	0.114616	0.112146	0.110658	0.112963	0.11293	0.113297	0.112857	0.113759
YER164W	0.0846432	0.0851376	0.0842008	0.0730413	0.0851596	0.0851744	0.0837599	0.0851538	0.0857979	0.0849623	0.084098	0.0846459	0.0848361	0.0851664	0.0845808	0.084473	0.0850669	0.084124	0.0845493	0.0846243	0.084473	0.084473	0.0847465
YER165W	0.042058	0.0421439	0.0410144	0.0369135	0.0421036	0.0419487	0.0405607	0.041428	0.0414465	0.0411775	0.0406564	0.0412098	0.0406644	0.0418099	0.0411388	0.041428	0.0420251	0.0414721	0.0404321	0.0404735	0.0402826	0.0402826	0.040356
YER166W	0.0792932	0.0800377	0.0788983	0.0794353	0.0793319	0.0795876	0.0791049	0.0794726	0.0803369	0.0796495	0.0787693	0.0790406	0.0793741	0.0795781	0.079106	0.0794726	0.0794367	0.0779309	0.0794836	0.0794609	0.0794726	0.0796835	0.0797268
YER167W	0.091068	0.0915308	0.0913354	0.0806465	0.0918965	0.0910512	0.0914694	0.0917652	0.0929741	0.0923246	0.0906353	0.0922472	0.0925338	0.0926597	0.0915683	0.0921169	0.0915931	0.0915759	0.0928898	0.0927248	0.0932292	0.0921169	0.0927382
YER168C	0.0971162	0.0969997	0.0962945	0.0876205	0.0956094	0.0958004	0.0953638	0.0956094	0.0969044	0.0975517	0.0955349	0.0967311	0.0965384	0.097683	0.0965165	0.0967706	0.0961776	0.0977064	0.0974402	0.0974158	0.0979872	0.0973789	0.0978
YER169W	0.10408	0.103718	0.103076	0.101653	0.104148	0.10376	0.10353	0.103076	0.104412	0.104992	0.102925	0.104291	0.104386	0.10447	0.103917	0.103623	0.103868	0.104717	0.104763	0.10447	0.104749	0.104749	0.104491
YER171W	0.0705832	0.0705011	0.0694858	0.0520281	0.0700134	0.0698943	0.0700602	0.0702427	0.0698169	0.0704156	0.0701717	0.0702629	0.0703278	0.0700535	0.0701266	0.0689655	0.0693822	0.0704719	0.0703284	0.0703373	0.0702099	0.0702427	0.0709631
YER173W	0.129379	0.127892	0.127344	0.128885	0.127755	0.128133	0.127334	0.128679	0.127436	0.12932	0.12626	0.128679	0.128612	0.128401	0.12793	0.128178	0.128125	0.128448	0.128671	0.128734	0.128679	0.127678	0.128358
YER174C	0.0928262	0.0953044	0.0901807	0.0907854	0.0938902	0.0936302	0.0894249	0.0935065	0.0942526	0.0886596	0.0895004	0.0898784	0.0898784	0.0898784	0.0912252	0.0921459	0.0896275	0.0893202	0.090359	0.0903319	0.0894249	0.0894249	0.0900179
YER175C	0.136732	0.137161	0.137985	0.138657	0.138503	0.138182	0.137994	0.14101	0.139648	0.139205	0.137769	0.138259	0.138714	0.139158	0.138647	0.138788	0.137677	0.138485	0.138643	0.138726	0.138788	0.137677	0.138474
YER176W	0.113299	0.113108	0.112681	0.114866	0.112829	0.113953	0.113055	0.112334	0.115169	0.114959	0.112339	0.114412	0.114749	0.114066	0.113672	0.113225	0.112385	0.113682	0.114913	0.114758	0.114709	0.114709	0.114873
YER177W	0.0605678	0.0617625	0.0601867	0.061803	0.0620535	0.062794	0.0614187	0.062794	0.0615906	0.0609137	0.0615739	0.061476	0.0615906	0.0614569	0.0617122	0.0615906	0.0652263	0.0605724	0.0616266	0.0615906	0.0615906	0.0615906	0.0616523
YER180C	0.118657	0.119892	0.115533	0.118232	0.118319	0.118725	0.116382	0.11791	0.118159	0.119442	0.115913	0.119107	0.118242	0.119196	0.117393	0.116915	0.118159	0.118446	0.11828	0.118297	0.119403	0.118159	0.119116
YER182W	0.101101	0.103278	0.10169	0.101757	0.101429	0.0996908	0.100168	0.099196	0.103541	0.101449	0.101634	0.101917	0.100829	0.10101	0.101491	0.103278	0.102438	0.099824	0.101333	0.10101	0.103278	0.101917	0.101917
YER183C	0.128545	0.12622	0.128248	0.128258	0.126501	0.12793	0.127579	0.126501	0.124421	0.12881	0.127462	0.128073	0.128073	0.1272	0.127517	0.126501	0.128475	0.127589	0.128807	0.12851	0.128073	0.128073	0.128073
YFL001W	0.0988269	0.100063	0.0979699	0.0999988	0.0995263	0.0990492	0.0997782	0.0986388	0.0990271	0.0980039	0.0977609	0.0993326	0.0994778	0.0991974	0.0987449	0.0986388	0.0996153	0.0972496	0.0994642	0.0993912	0.0993333	0.0986388	0.0993912
YFL003C	0.0939813	0.094451	0.0941393	0.0958049	0.0937446	0.0940451	0.0951955	0.0937349	0.0964011	0.0941851	0.0941351	0.0950527	0.0955545	0.0952302	0.0942234	0.0948721	0.0950738	0.0940557	0.0956038	0.0957145	0.0956595	0.095267	0.0958247
YFL005W	0.0589226	0.0593635	0.0590083	0.0606473	0.0587643	0.0589226	0.0587903	0.0589226	0.0573793	0.0589226	0.0589869	0.0590695	0.0595398	0.0602086	0.0590629	0.0589226	0.0589554	0.0590413	0.0603276	0.0604658	0.0604658	0.0604658	0.0589621
YFL007W	0.0974602	0.100321	0.0974498	0.0976236	0.0991809	0.0990769	0.0975815	0.0987942	0.0998725	0.0977205	0.0981702	0.0985869	0.0982138	0.0986128	0.0986948	0.0988062	0.0992474	0.0985092	0.0985914	0.0986388	0.0986507	0.0986388	0.0985487
YFL008W	0.0881078	0.0885922	0.0868421	0.0803967	0.0886306	0.0887393	0.0877509	0.0883941	0.0883854	0.0877161	0.0871209	0.0883425	0.0879421	0.0881078	0.0881996	0.0889366	0.0884287	0.0887279	0.0881411	0.0881832	0.088415	0.0881229	0.088102
YFL012W	0.198798	0.201544	0.196094	0.199929	0.197576	0.202424	0.200433	0.195354	0.202594	0.19952	0.196403	0.199904	0.200094	0.199675	0.19881	0.204242	0.198143	0.197918	0.199649	0.199798	0.199798	0.197576	0.199798
YFL013C	0.113782	0.114402	0.11056	0.113869	0.111039	0.113534	0.112848	0.11154	0.113032	0.111585	0.110394	0.113897	0.113575	0.113024	0.111613	0.113448	0.111124	0.112934	0.114192	0.114455	0.114402	0.113945	0.1139
YFL014W	0.0481818	0.0461039	0.0468013	0.0522282	0.0484848	0.046832	0.0505628	0.0454545	0.0454545	0.0464962	0.0460859	0.0510823	0.049899	0.0516835	0.0480257	0.0454545	0.0491296	0.0454545	0.0539349	0.0545455	0.0543124	0.0545455	0.0516706
YFL017C	0.101968	0.0999256	0.0940972	0.101838	0.0997863	0.0971591	0.100655	0.0958333	0.0964382	0.0958333	0.0976273	0.101786	0.102917	0.10162	0.0992214	0.0958333	0.101064	0.0985577	0.104019	0.104282	0.104167	0.104167	0.102083
YFL022C	0.0701058	0.0704034	0.0688051	0.0691488	0.0716897	0.0712602	0.0706349	0.0728836	0.0698327	0.0711475	0.0693654	0.070805	0.0705467	0.070826	0.0707191	0.0715608	0.0708432	0.0717135	0.0709192	0.0710097	0.0708995	0.0708995	0.0708995
YFL025C	0.107038	0.10801	0.10643	0.108486	0.108496	0.109588	0.108201	0.108119	0.108897	0.108006	0.106519	0.108571	0.108247	0.108391	0.108049	0.109964	0.108685	0.107884	0.108536	0.108444	0.108251	0.108374	0.108521
YFL026W	0.0950372	0.0985976	0.0945099	0.0964465	0.0984669	0.0974327	0.0959796	0.0993967	0.102483	0.0955628	0.0940062	0.0968504	0.0961046	0.0969105	0.0962558	0.0947671	0.0989042	0.0964884	0.096381	0.0963103	0.0970226	0.0963103	0.0966071
YFL028C	0.0979101	0.0963913	0.0969523	0.0990596	0.0962007	0.0960293	0.0985998	0.0990596	0.0922742	0.0983771	0.0971758	0.0985122	0.0985232	0.0986126	0.0965633	0.0956113	0.0948287	0.0962302	0.098888	0.0990596	0.0988827	0.0990596	0.0990596
YFL029C	0.131346	0.130017	0.128952	0.130932	0.128831	0.129178	0.130675	0.129178	0.129265	0.130646	0.128563	0.130124	0.130804	0.130734	0.129625	0.128275	0.129332	0.129734	0.131035	0.130985	0.130915	0.130985	0.130869
YFL033C	0.0890315	0.091194	0.0855665	0.0829863	0.0895584	0.0907155	0.0880818	0.091298	0.091527	0.0889502	0.0883245	0.0896249	0.0894654	0.0898416	0.088734	0.091298	0.0905005	0.0873349	0.0896066	0.0895079	0.0899256	0.0898416	0.089353
YFL034W	0.113875	0.112741	0.111824	0.112654	0.114616	0.114743	0.111822	0.115304	0.113113	0.113983	0.112951	0.114026	0.113717	0.114138	0.113459	0.114687	0.115009	0.111862	0.114168	0.114087	0.114046	0.11407	0.114078
YFL037W	0.0553014	0.0554259	0.0559994	0.0559614	0.0553042	0.0552585	0.0548605	0.0551924	0.0544662	0.0553286	0.0543351	0.0557458	0.0553377	0.0557169	0.0554419	0.0551924	0.0552852	0.0548014	0.0558807	0.0559187	0.0559187	0.0559187	0.0563469
YFL041W	0.0931908	0.0931257	0.090728	0.0930092	0.0935843	0.0931466	0.0913121	0.0929958	0.0909264	0.09109	0.0904085	0.0928478	0.0924753	0.0925575	0.0924445	0.0919792	0.0937665	0.0902506	0.0925287	0.0928358	0.0923459	0.0925142	0.0932451
YFL044C	0.10234	0.106529	0.100054	0.100845	0.103223	0.10261	0.10025	0.106081	0.102081	0.100085	0.0999475	0.101382	0.101057	0.101277	0.101477	0.10091	0.104234	0.102179	0.101358	0.101216	0.101418	0.10091	0.101756
YFL045C	0.0733749	0.0744504	0.072998	0.0737968	0.0726572	0.0727273	0.07361	0.0737968	0.075104	0.0740419	0.0728527	0.0744193	0.0738839	0.0736515	0.0735327	0.0724896	0.0724896	0.0737968	0.0738358	0.073942	0.0737968	0.0737968	0.075171
YFL046W	0.0787154	0.0774509	0.0771914	0.0805636	0.0758487	0.07641	0.0783281	0.0788749	0.0788749	0.0786755	0.0763275	0.0795584	0.0798318	0.0791407	0.07757	0.0788749	0.0772121	0.0751943	0.079827	0.0804698	0.0793656	0.0788749	0.0790793
YFL047W	0.0975395	0.0971362	0.0966589	0.0995612	0.0972267	0.0965671	0.0988545	0.0972028	0.0986014	0.0976544	0.0961279	0.0993118	0.0987257	0.0984201	0.0973111	0.0972028	0.0972028	0.0962345	0.0985071	0.0985496	0.0995697	0.0981546	0.0992469
YFL049W	0.128171	0.130359	0.126568	0.127005	0.128709	0.128739	0.126159	0.129079	0.128321	0.126208	0.125236	0.127095	0.127192	0.127566	0.127435	0.127477	0.129182	0.128545	0.127141	0.127121	0.127148	0.12692	0.128244
YFR001W	0.0896876	0.0877468	0.0872629	0.0902917	0.0888472	0.0878049	0.0878978	0.0861789	0.0874902	0.0886687	0.087421	0.0884243	0.0893225	0.0891599	0.0879363	0.0878049	0.0878049	0.0883052	0.0891325	0.0891599	0.0894309	0.0894309	0.0894309
YFR002W	0.0839105	0.0851964	0.0833634	0.0848612	0.0843148	0.0845238	0.0838755	0.0848846	0.0861774	0.0842701	0.0839256	0.0843778	0.0844661	0.0847964	0.0842914	0.0844877	0.0847495	0.0842563	0.0849698	0.0849066	0.0848235	0.0840909	0.0850575
YFR004W	0.0660152	0.0685202	0.0673785	0.0684678	0.0675409	0.0687	0.067132	0.0673181	0.0675283	0.0675217	0.066926	0.0677835	0.0674629	0.0676197	0.067691	0.0673181	0.0689352	0.0679863	0.0675085	0.0679817	0.0673181	0.0662324	0.0684317
YFR006W	0.0883396	0.0881086	0.0849226	0.0883085	0.0870487	0.086782	0.0877221	0.0864428	0.0903747	0.0870841	0.0853804	0.0878643	0.0873549	0.0873065	0.0867946	0.0870647	0.0868133	0.0876387	0.0879148	0.0878593	0.0876866	0.0876866	0.0887623
YFR007W	0.108914	0.109199	0.107168	0.109684	0.109753	0.111907	0.108882	0.108778	0.111525	0.109203	0.108363	0.109382	0.10914	0.109633	0.108869	0.111495	0.110551	0.10829	0.109775	0.110237	0.109684	0.109684	0.110032
YFR009W	0.0813192	0.0816385	0.080906	0.0784756	0.0810763	0.0807316	0.0813318	0.0814962	0.0814962	0.0815516	0.0813856	0.0823605	0.0814962	0.0819389	0.0812682	0.0806109	0.0810818	0.0814962	0.0820347	0.0821357	0.0823816	0.0819389	0.0825632
YFR010W	0.0670665	0.0680787	0.066966	0.0686734	0.0671242	0.0676407	0.067852	0.0670394	0.0685329	0.0682795	0.0672232	0.0679843	0.0680495	0.068252	0.0673127	0.0677008	0.0672505	0.0675482	0.0683449	0.0683622	0.0683622	0.0683622	0.0684131
YFR011C	0.0902534	0.0906433	0.0888023	0.0898979	0.0887689	0.0889598	0.0901142	0.0916179	0.0909262	0.0914961	0.088342	0.0895758	0.0896686	0.0898852	0.0892551	0.0896686	0.0897516	0.0896686	0.0900978	0.090535	0.0896686	0.0896686	0.0896686
YFR013W	0.102624	0.102077	0.100555	0.101872	0.10078	0.101756	0.102029	0.101946	0.102793	0.103549	0.100532	0.102681	0.103197	0.102965	0.10133	0.103197	0.10088	0.10201	0.103748	0.1038	0.103614	0.103614	0.104139
YFR014C	0.101342	0.100754	0.0992316	0.10107	0.101768	0.100339	0.100219	0.0987185	0.100032	0.102721	0.0990494	0.101182	0.100863	0.100621	0.100318	0.101121	0.0994683	0.100387	0.101147	0.101162	0.101573	0.101121	0.101103
YFR017C	0.0880352	0.0889213	0.085223	0.0901361	0.0903105	0.0904453	0.0879981	0.0896259	0.0896423	0.089392	0.0868292	0.0877065	0.0875283	0.087963	0.0882808	0.0884354	0.0898828	0.0888278	0.0883211	0.0884354	0.0883046	0.0884354	0.0893511
YFR019W	0.0988223	0.0976974	0.0964395	0.0984182	0.0981621	0.0986355	0.0975847	0.098938	0.0985954	0.09806	0.096514	0.0984599	0.0981884	0.0983574	0.0976934	0.0975078	0.0984939	0.0984848	0.0984595	0.0986186	0.0985393	0.0983432	0.0981581
YFR021W	0.0775116	0.0790419	0.0756043	0.0767132	0.079784	0.0792536	0.0771695	0.0800399	0.0791814	0.077233	0.076667	0.0772835	0.0771568	0.0774525	0.0780829	0.0793746	0.0797002	0.0799887	0.0767902	0.0767502	0.0770203	0.0767132	0.0766791
YFR022W	0.0962913	0.0946476	0.0926919	0.0966987	0.0958502	0.0952961	0.0954424	0.0969616	0.0965436	0.0968219	0.0947957	0.096685	0.0965445	0.0970609	0.0953322	0.0974084	0.0962486	0.0950368	0.09717	0.0972098	0.0974084	0.0969616	0.0972022
YFR023W	0.0799417	0.0810923	0.0792761	0.0813917	0.0802334	0.0806294	0.0808243	0.0813602	0.0818616	0.0808578	0.079879	0.0814113	0.0813245	0.0813602	0.080689	0.0797525	0.0815199	0.0816488	0.0812902	0.0812709	0.0811129	0.0829679	0.0808106
YFR025C	0.0987599	0.0974419	0.0955247	0.0999241	0.0978861	0.098566	0.0980017	0.0991071	0.096803	0.100223	0.0959987	0.0999575	0.100099	0.100375	0.0984177	0.097123	0.0981151	0.0996413	0.100592	0.100926	0.101473	0.100099	0.100074
YFR027W	0.10461	0.0976275	0.102843	0.10429	0.100524	0.103589	0.0994934	0.104965	0.104236	0.103498	0.0981186	0.104137	0.102537	0.10067	0.100548	0.100236	0.100677	0.100282	0.103889	0.103599	0.103619	0.104846	0.103634
YFR030W	0.0936847	0.0949043	0.0921247	0.0948589	0.0947778	0.0947874	0.0935983	0.0933982	0.0958835	0.0935971	0.0929604	0.0943533	0.0942047	0.0941233	0.0939127	0.0943533	0.0957826	0.0934227	0.0943248	0.0943886	0.0945002	0.0943533	0.094941
YFR037C	0.0841508	0.0845067	0.0822182	0.0845281	0.0838235	0.0840936	0.0838283	0.0881123	0.0867788	0.0840987	0.0810417	0.0848694	0.0846077	0.0845281	0.0842891	0.0863202	0.0837019	0.0851254	0.0845994	0.0845613	0.0845281	0.0845281	0.0842769
YFR040W	NaN	0.0903837	0.0895771	0.0906621	0.090101	0.0905248	0.0905129	0.0909682	0.0918075	0.0908237	0.0892654	0.091247	0.0904262	0.0906726	0.0898097	0.0903178	0.0897089	0.090643	0.0908626	0.0916186	0.0909682	0.0912934	0.0917937
YFR041C	0.108047	0.111187	0.10631	0.107084	0.108359	0.108006	0.107084	0.110463	0.110426	0.106908	0.106928	0.108103	0.10731	0.107585	0.107858	0.107084	0.109361	0.10821	0.107294	0.107147	0.107084	0.107084	0.107373
YFR042W	0.108262	0.108936	0.107175	0.108486	0.108521	0.109151	0.110228	0.111413	0.108096	0.105971	0.108856	0.107859	0.109754	0.109294	0.109654	0.111413	0.111271	0.107713	0.109928	0.109846	0.109754	0.109754	0.109712
YFR043C	0.13391	0.135096	0.133081	0.134398	0.132968	0.133638	0.134398	0.135793	0.134488	0.132393	0.1319	0.134797	0.134398	0.134476	0.133497	0.134398	0.133093	0.132145	0.134622	0.134553	0.134398	0.134398	0.134363
YFR044C	0.07522	0.0741679	0.0746399	0.0754173	0.0747049	0.0755061	0.0755312	0.075877	0.0773739	0.0751033	0.0744754	0.0753534	0.0756235	0.0754467	0.0752197	0.0759462	0.0750928	0.0750418	0.0757888	0.0763688	0.0759462	0.0759462	0.0752724
YFR046C	0.14024	0.143412	0.139533	0.140946	0.138967	0.142928	0.140746	0.138221	0.14039	0.141088	0.138524	0.141076	0.140825	0.140946	0.14035	0.144579	0.13911	0.138291	0.141011	0.14135	0.140946	0.140946	0.14097
YFR049W	0.123803	0.128046	0.122787	0.105744	0.131908	0.132698	0.12411	0.130254	0.12878	0.125046	0.123646	0.127054	0.124878	0.126371	0.12629	0.130254	0.132942	0.125912	0.124929	0.125176	0.124878	0.124878	0.124878
YFR050C	0.0892861	0.0927817	0.0904236	0.0849606	0.0903969	0.0896607	0.0909091	0.0909091	0.0909494	0.0891535	0.089782	0.0906118	0.0909091	0.090701	0.0902786	0.0896607	0.0906966	0.0889884	0.0909557	0.0909784	0.0909091	0.0909091	0.0909091
YFR051C	0.0965071	0.0960414	0.0958673	0.0878345	0.0976251	0.0971137	0.0963461	0.0967813	0.0964668	0.0963243	0.0960704	0.0967233	0.0966188	0.0969506	0.0968306	0.0967813	0.0977278	0.0958438	0.0966586	0.0970522	0.0967813	0.0967813	0.096172
YFR052W	0.0793719	0.079571	0.0778635	0.0639831	0.0786664	0.0768044	0.078281	0.0777961	0.0790474	0.0802583	0.0771564	0.0784888	0.0788466	0.0788736	0.0778451	0.0790083	0.0777961	0.0771435	0.0791666	0.0792103	0.0790083	0.0790083	0.079288
YFR053C	0.0638671	0.0610358	0.063928	0.0466392	0.0641857	0.0626637	0.0649511	0.068213	0.0622835	NaN	0.0627044	0.0644125	0.0643181	0.0640908	0.0633867	0.0634119	0.0647836	0.0615126	0.0650784	0.0656531	0.0651578	0.0651578	0.0646477
YGL001C	0.0793506	0.0804453	0.0785329	0.0789407	0.080071	0.0806848	0.0793197	0.0811255	0.0797123	0.0785065	0.0783742	0.079765	0.0793362	0.0798509	0.0793327	0.0801732	0.0811661	0.0798801	0.0791852	0.0792208	0.0792208	0.0792208	0.0792208
YGL002W	0.0912442	0.0916722	0.0909712	0.0921659	0.0958289	0.0941209	0.0919903	0.0906298	0.0909767	0.0920219	0.0911632	0.0927511	0.0919611	0.0921659	0.0924607	0.093702	0.0937674	0.0909843	0.0924468	0.0921659	0.092993	0.0921659	0.0923234
YGL003C	0.0920421	0.0921364	0.0920967	0.0933455	0.0924836	0.0916039	0.0932912	0.0926193	0.0918418	0.0919947	0.0917578	0.0931792	0.0927369	0.092358	0.0922657	0.0926193	0.0920689	0.0915792	0.0933344	0.0934358	0.0935238	0.0932072	0.0931168
YGL004C	0.117827	0.118851	0.11679	0.118572	0.119973	0.120408	0.117575	0.11998	0.119903	0.118435	0.117355	0.119182	0.118651	0.118046	0.118438	0.11998	0.119912	0.116361	0.119105	0.119271	0.119182	0.119182	0.118385
YGL005C	0.135436	0.139919	0.136214	0.136741	0.13957	0.140515	0.136639	0.139114	0.135631	0.13637	0.13684	0.136628	0.137057	0.136873	0.137448	0.1403	0.140906	0.137197	0.136856	0.136741	0.13738	0.136741	0.137775
YGL006W	0.103194	0.104308	0.103268	0.103737	0.104721	0.105016	0.103334	0.104003	0.104783	0.103034	0.103261	0.103926	0.103955	0.103678	0.103912	0.103804	0.104438	0.103084	0.103821	0.103757	0.104088	0.103804	0.104262
YGL009C	0.0749066	0.0764012	0.0744114	0.0756341	0.075997	0.0752378	0.0747977	0.076855	0.0765954	0.0751078	0.0745843	0.0749994	0.0744831	0.0752078	0.0751265	0.0751608	0.0760169	0.0745417	0.0744733	0.0743607	0.0747046	0.0734666	0.0749936
YGL010W	0.0909176	0.0920947	0.0899917	0.0905486	0.0939286	0.0939734	0.0899946	0.0917603	0.0982844	0.0900047	0.0904338	0.090601	0.090387	0.091032	0.0917036	0.0917603	0.0954658	0.0904638	0.0900344	0.0899917	0.0898876	0.0898876	0.0905599
YGL011C	0.0791173	0.0836157	0.0780266	0.0792064	0.0805378	0.0840819	0.0771316	0.0816864	0.0803689	0.0792572	0.0772215	0.0793651	0.0780852	0.0786854	0.0791712	0.0803689	0.0803689	0.0824972	0.0781075	0.0783926	0.0777339	0.0777339	0.0779703
YGL012W	0.0951477	0.0971971	0.094546	0.0950194	0.0961448	0.0957039	0.0948362	0.0956399	0.0970464	0.0950466	0.0944874	0.095372	0.0953118	0.0952883	0.0953132	0.0956399	0.0956699	0.0949367	0.0954274	0.0955227	0.0956399	0.0956399	0.0957662
YGL014W	0.0995729	0.0997529	0.098543	0.0992077	0.0994276	0.0999411	0.0987424	0.099483	0.099959	0.0994942	0.098568	0.0992087	0.099315	0.099183	0.0989703	0.0990953	0.0999578	0.0997599	0.0993245	0.099483	0.0998152	0.098763	0.0992522
YGL015C	0.160627	0.160859	0.159354	0.160618	0.160311	0.161693	0.160041	0.163313	0.170946	0.157905	0.159814	0.161253	0.161786	0.16204	0.161411	0.160768	0.161851	0.158811	0.161338	0.161333	0.160768	0.158223	0.160311
YGL016W	0.0761329	0.0768238	0.0753079	0.0771151	0.0765705	0.0758976	0.0764764	0.07755	0.0783848	0.0769531	0.0757615	0.0769779	0.0766874	0.0767969	0.0763519	0.0760096	0.0763177	0.0756542	0.0770224	0.0769338	0.0774315	0.0769467	0.0769575
YGL017W	0.11394	0.114474	0.111702	0.115239	0.115238	0.114839	0.114198	0.11556	0.113427	0.114196	0.112814	0.114713	0.11459	0.114428	0.114504	0.113576	0.114997	0.115015	0.11504	0.115106	0.11495	0.1152	0.115267
YGL019W	0.0617899	0.062277	0.0625068	0.0493295	0.0639034	0.0657109	0.0624215	0.0654936	0.0624875	0.0616854	0.0620919	0.0623646	0.0625466	0.0627723	0.0631283	0.0642989	0.0642989	0.0631961	0.0622482	0.0619758	0.0626446	0.0619094	0.0628284
YGL020C	0.116159	0.115393	0.11328	0.114369	0.114318	0.114664	0.116835	0.11736	0.116312	0.116963	0.113495	0.116822	0.117266	0.115477	0.115063	0.114535	0.114746	0.117034	0.117007	0.117282	0.11736	0.11736	0.115694
YGL026C	0.0719226	0.0721883	0.0707142	0.0722051	0.0710776	0.0718627	0.0721378	0.0726759	0.072843	0.0712929	0.0709954	0.0721154	0.0722051	0.0714989	0.0716725	0.0717343	0.0708327	0.0721327	0.0722859	0.0722313	0.0722051	0.0722051	0.0723137
YGL027C	0.0951697	0.0956943	0.0931692	0.09501	0.0958289	0.0953729	0.0949986	0.09501	0.0977529	0.0947106	0.0935241	0.0953331	0.0948769	0.0944112	0.0950301	0.0958084	0.0960972	0.0948871	0.0950383	0.0948769	0.09501	0.09501	0.0949383
YGL029W	0.0651515	0.0765447	0.0661157	0.0661157	0.0661157	0.0666166	0.0661157	0.0661157	0.0655825	0.0680096	0.0661157	0.0663781	0.0661157	0.0664218	0.0662827	0.0661157	0.0661157	0.0661157	0.0663521	0.0662687	0.0661157	0.0661157	0.0661157
YGL035C	0.105377	0.101882	0.101296	0.102446	0.101685	0.101769	0.102662	0.103579	0.103185	0.102776	0.101367	0.103977	0.102845	0.102616	0.102424	0.10101	0.10168	0.104172	0.103846	0.103365	0.102986	0.102964	0.103678
YGL036W	0.107566	0.106699	0.104061	0.0970001	0.106002	0.10633	0.10714	0.105706	0.10898	0.107026	0.104542	0.107391	0.106958	0.107211	0.106296	0.106428	0.106313	0.106762	0.107354	0.107311	0.107512	0.107166	0.107882
YGL037C	0.0805334	0.0819818	0.0791168	0.0710548	0.079537	0.078341	0.0803359	0.0809943	0.0794582	0.0793142	0.0787115	0.0798971	0.079663	0.0796289	0.0792875	0.0794582	0.0794909	0.0795763	0.0795957	0.0794582	0.0794582	0.0794582	0.0810337
YGL038C	0.119087	0.119013	0.117781	0.119026	0.11899	0.118993	0.119354	0.120816	0.120615	0.119671	0.117887	0.119598	0.119341	0.119318	0.119314	0.120124	0.118859	0.11922	0.119515	0.119625	0.120124	0.11877	0.119486
YGL039W	0.105836	0.107643	0.103641	0.101664	0.103318	0.10623	0.106803	0.105042	0.102783	0.105742	0.103421	0.105309	0.106225	0.10665	0.105099	0.102241	0.103632	0.10655	0.106455	0.106339	0.105329	0.106015	0.106463
YGL040C	0.0804886	0.08162	0.080494	0.0670918	0.0809508	0.0810142	0.0817033	0.0809259	0.0799541	0.0815333	0.0808989	0.081111	0.081185	0.0816277	0.0813578	0.0818977	0.0810499	0.0815239	0.0818143	0.0815198	0.0812249	0.0809664	0.082097
YGL044C	0.0678118	0.0688176	0.0689791	0.0624827	0.069012	0.0683068	0.0684954	0.0694069	0.0672067	0.0684787	0.0667636	0.0676258	0.0677934	0.0680012	0.0680624	0.0672067	0.0693601	0.0691531	0.0683109	0.0679401	0.0672067	0.0683068	0.0683068
YGL045W	0.105491	0.104718	0.103663	0.106423	0.104862	0.103897	0.104846	0.104972	0.106423	0.102651	0.102739	0.104404	0.10469	0.104467	0.104138	0.104359	0.105377	0.104676	0.104944	0.104786	0.104582	0.104582	0.104535
YGL047W	0.118458	0.118376	0.117829	0.118376	0.11846	0.116883	0.118751	0.12166	0.12166	0.117401	0.116027	0.119158	0.118485	0.118558	0.118757	0.118376	0.120542	0.118502	0.118737	0.118376	0.120018	0.120018	0.118292
YGL048C	0.0685961	0.0700211	0.0676167	0.0691587	0.0704391	0.0701597	0.0679803	0.0706076	0.06735	0.0681958	0.0669244	0.0681054	0.0678708	0.0680989	0.0685592	0.0697865	0.070066	0.0686497	0.0682088	0.0682813	0.0681445	0.0681445	0.0690708
YGL049C	0.104232	0.104666	0.10376	0.094731	0.10492	0.104903	0.103377	0.106226	0.106073	0.10369	0.103355	0.104095	0.104164	0.104346	0.104131	0.105134	0.104801	0.104239	0.104749	0.104629	0.104295	0.105134	0.104192
YGL050W	0.123112	0.127192	0.121676	0.12592	0.126589	0.126702	0.123784	0.12758	0.125009	0.122711	0.121843	0.123094	0.123232	0.123085	0.12403	0.126372	0.126604	0.123028	0.122857	0.123018	0.122749	0.122749	0.122935
YGL054C	0.0694245	0.0695444	0.0695444	0.0544506	0.0696673	0.0695444	0.0702295	0.0695444	0.0695444	0.0694694	0.0670797	0.0696586	0.0695444	0.0695444	0.0695201	0.0695444	0.0695444	0.0695444	0.0695444	0.0695444	0.0695444	0.0695444	0.0695444
YGL055W	0.0510763	0.0535831	0.0516054	0.0402133	0.053239	0.0546166	0.0530239	0.0521853	0.0523957	0.051431	0.0514786	0.0519368	0.0518808	0.0520403	0.0524093	0.0515329	0.0531707	0.0521853	0.0520514	0.0519678	0.0521853	0.0521853	0.0522354
YGL056C	0.0846706	0.0846837	0.0817008	0.0854045	0.082958	0.0832916	0.0838492	0.0841813	0.0861542	0.0849076	0.0823719	0.0840065	0.0847113	0.0838075	0.0840701	0.082958	0.0832834	0.0848399	0.0854667	0.0853705	0.085875	0.0854045	0.0863925
YGL059W	0.0773713	0.0785666	0.0779654	0.0779531	0.078664	0.0790219	0.0770228	0.0785908	0.0772358	0.0777227	0.0771887	0.0775936	0.0775519	0.0773863	0.0775916	0.0813008	0.0788214	0.0771315	0.0782621	0.0780638	0.0785908	0.0785908	0.0780001
YGL061C	0.100031	0.100501	0.0994556	0.0998289	0.101311	0.0982405	0.0994065	0.0998289	0.102517	0.0997869	0.0997169	0.100341	0.0995601	0.0996796	0.0999783	0.0971408	0.0998575	0.099312	0.0999894	0.100202	0.0998289	0.102853	0.100966
YGL063W	0.0999716	0.0998652	0.0991352	0.0997992	0.0996867	0.100539	0.0987678	0.0978437	0.100277	0.0995208	0.0980308	0.100068	0.0997604	0.0993411	0.0995214	0.0996406	0.0998509	0.0989495	0.0997647	0.0997404	0.0996406	0.0996406	0.0997558
YGL064C	0.123579	0.123787	0.122452	0.124022	0.12335	0.124771	0.12315	0.125687	0.125093	0.12362	0.122675	0.123639	0.123469	0.12398	0.123396	0.123639	0.124307	0.123045	0.123696	0.123639	0.123639	0.123639	0.123608
YGL065C	0.117347	0.115481	0.114234	0.117647	0.113384	0.114177	0.115306	0.115741	0.117149	0.115947	0.113729	0.116497	0.116138	0.116696	0.115514	0.111772	0.114432	0.117063	0.117441	0.117688	0.117725	0.117725	0.117199
YGL067W	0.1222	0.121868	0.120221	0.123022	0.122248	0.121448	0.120653	0.122157	0.122157	0.12148	0.120497	0.12207	0.122388	0.123175	0.121894	0.120425	0.122378	0.123022	0.123156	0.122878	0.124554	0.123022	0.123156
YGL068W	0.0734542	0.0710733	0.0697038	0.0710132	0.07097	0.0710132	0.0713499	0.0710132	0.0746517	0.0713288	0.0704286	0.0712537	0.0711254	0.0715743	0.0707581	0.0710132	0.0709773	0.0711427	0.0712393	0.0711067	0.0710132	0.0710132	0.0729557
YGL070C	0.0615176	0.0616531	0.0623306	0.0667942	0.0624001	0.0623306	0.0624855	0.0623306	0.0623306	0.0650407	0.0632716	0.0641373	0.0628726	0.0633845	0.0630697	0.0623306	0.0623883	0.0669168	0.0655665	0.064589	0.0650407	0.0677507	0.0650407
YGL071W	0.115587	0.116392	0.111622	0.115181	0.116125	0.116183	0.114168	0.115013	0.114659	0.114536	0.113165	0.114808	0.114828	0.11602	0.114801	0.115099	0.116027	0.115019	0.115271	0.11541	0.11538	0.11549	0.116529
YGL077C	0.0890262	0.0907228	0.0880955	0.0890499	0.0894808	0.0916914	0.0890508	0.0902311	0.0902496	0.0887875	0.0883027	0.088947	0.0888159	0.089243	0.0892343	0.0925259	0.0902433	0.0897015	0.0890622	0.0891474	0.0890395	0.0890836	0.0891866
YGL078C	0.0828906	0.0816617	0.0817345	0.0827101	0.082343	0.0805014	0.0822264	0.0803289	0.082859	0.0833926	0.0813743	0.0826782	0.0825216	0.0828941	0.0820987	0.0809614	0.0822264	0.082567	0.0827386	0.0833158	0.0834428	0.0834915	0.0822427
YGL079W	0.104774	0.103165	0.103116	0.104738	0.105172	0.103639	0.104295	0.102947	0.104469	0.105373	0.10337	0.104107	0.104063	0.104385	0.103988	0.101425	0.104502	0.104352	0.104526	0.104385	0.104469	0.104469	0.104469
YGL080W	0.0798956	0.0774925	0.0787647	0.080037	0.0778839	0.079343	0.0804005	0.0774925	0.080037	0.080037	0.0779166	0.0795523	0.0795281	0.0817334	0.0792249	0.080037	0.0774925	0.0798413	0.0799136	0.0794716	0.0776882	0.080037	0.0801023
YGL082W	0.0957525	0.0940312	0.0936106	0.096924	0.0943568	0.0958346	0.0948347	0.0974933	0.0960961	0.0955101	0.0944259	0.0951059	0.0950923	0.0951531	0.0949724	0.0931303	0.094894	0.0948022	0.0956773	0.0956379	0.0963949	0.096462	0.0959474
YGL083W	0.122031	0.124872	0.120071	0.121919	0.123268	0.124066	0.121535	0.124592	0.1227	0.121442	0.120369	0.121445	0.121948	0.122458	0.122614	0.125418	0.12308	0.122304	0.122004	0.121815	0.121923	0.1217	0.123141
YGL091C	0.0764944	0.0759951	0.076168	0.0759461	0.0809524	0.0781892	0.0749602	0.0758865	0.0781416	0.07481	0.0758584	0.075597	0.0756163	0.0755488	0.0764903	0.0768997	0.0801117	0.0751851	0.0750321	0.0751548	0.0748734	0.0748734	0.0769517
YGL092W	0.129677	0.131418	0.12945	0.130213	0.130675	0.130985	0.129437	0.131306	0.131454	NaN	0.128859	0.129616	0.130302	0.129978	0.12984	0.13203	0.130607	0.129096	0.129744	0.129925	0.12982	0.130099	0.130155
YGL093W	0.149081	0.147694	0.147055	0.149571	0.150817	0.149027	0.146988	0.147455	0.14626	0.144522	0.146843	0.148951	0.148511	0.147633	0.148279	0.149964	0.150842	0.145081	0.148621	0.148322	0.148879	0.148544	0.148954
YGL094C	0.0932945	0.0928337	0.0928846	0.0932673	0.0925681	0.0930868	0.0927718	0.092951	0.0926716	0.0929137	0.0922209	0.0930648	0.0929311	0.0929842	0.092633	0.0917563	0.0926778	0.0923996	0.0933198	0.0930174	0.0931578	0.0932497	0.092928
YGL095C	0.0965353	0.0976867	0.0965673	0.0970263	0.0980779	0.0967708	0.0963955	0.0962474	0.0967489	0.0962834	0.0967272	0.0968506	0.0965545	0.0969311	0.0968057	0.0973989	0.0982808	0.0959375	0.0969134	0.0973669	0.0968232	0.0968232	0.097207
YGL096W	0.127574	0.129261	NaN	0.129418	0.126947	0.126858	0.127806	0.126639	0.126755	0.12796	0.125397	0.125895	0.128482	0.1277	0.126584	0.124235	0.125488	0.126454	0.128593	0.128776	0.129043	0.129043	0.130342
YGL097W	0.102111	0.102702	0.100275	0.102158	0.101599	0.101637	0.101551	0.101387	0.101297	0.100416	0.101693	0.101781	0.101295	0.101923	0.101496	0.101387	0.101108	0.100962	0.101657	0.102307	0.102501	0.102077	0.102201
YGL098W	0.120596	0.12229	0.120671	0.121951	0.124349	0.121951	0.120248	0.120596	0.119416	0.120596	0.120295	0.122016	0.120958	0.120822	0.121062	0.121951	0.121951	0.121222	0.120763	0.12022	0.121117	0.120596	0.120909
YGL099W	0.0830209	0.0847965	0.0816772	0.0829046	0.0835523	0.0841907	0.0826592	0.0840028	0.0840362	0.083809	0.0827042	0.0836829	0.0828345	0.0832276	0.0831728	0.083486	0.083519	0.083009	0.0826279	0.0830266	0.0829692	0.0829692	0.08338
YGL100W	0.089027	0.0905329	0.0875709	0.0900661	0.0889832	0.0893551	0.0890542	0.0897868	0.090859	0.0898758	0.0898131	0.0903294	0.0904832	0.0908419	0.0896429	0.0878874	0.0888573	0.0890562	0.0903808	0.0902088	0.0911017	0.0907364	0.0897868
YGL101W	0.0986111	0.100143	0.0973937	0.0972222	0.0972618	0.0989057	0.0977954	0.0972222	0.0966746	0.0970775	0.0975223	0.0984715	0.098251	0.0974794	0.0978613	0.0987654	0.0972222	0.0972222	0.0978499	0.097308	0.0981719	0.0987654	0.0972222
YGL104C	0.0994644	0.0992114	0.0989879	0.0995994	0.0989793	0.0990184	0.0989777	0.0979818	0.102118	0.100665	0.0987177	0.099419	0.0996809	0.0993232	0.0989235	0.0993232	0.0987381	0.0986009	0.100074	0.0997703	0.1002	0.100665	0.0997015
YGL105W	0.0593642	0.0601094	0.0591235	0.05932	0.0620179	0.061651	0.0587895	0.0610883	0.0596052	0.0584936	0.0576622	0.0591937	0.0596147	0.0595165	0.0596147	0.0602042	0.0611071	0.059252	0.0593662	0.058927	0.0597961	0.05932	0.05932
YGL106W	0.0908889	0.0910317	0.0890123	0.0911111	0.0889459	0.0905051	0.0905397	0.0888889	0.0892473	0.0913194	0.0893827	0.0892063	0.0907744	0.0903928	0.0899378	0.0911111	0.0882742	0.0895727	0.091528	0.0912346	0.0911111	0.0933333	0.0911111
YGL107C	0.113433	0.113044	0.111345	0.114315	0.112293	0.112714	0.112274	0.114255	0.112201	0.11151	0.110795	0.112396	0.11357	0.113399	0.11252	0.112714	0.112354	0.112912	0.114163	0.113856	0.114255	0.114255	0.114255
YGL110C	0.124448	0.125096	0.123813	0.124252	0.123481	0.125523	0.123431	0.123782	0.122423	0.125546	0.123048	0.123968	0.124173	0.124197	0.124073	0.124848	0.123544	0.124233	0.124367	0.1239	0.124315	0.124848	0.124657
YGL111W	0.132814	0.134015	0.13111	0.129157	0.134935	0.134404	0.129053	0.132706	0.130852	0.130394	0.128426	0.130243	0.129402	0.130751	0.131364	0.133425	0.134831	0.129501	0.129144	0.129673	0.129557	0.129114	0.129851
YGL112C	0.0812701	0.082182	0.0810588	0.0825274	0.0818827	0.0827619	0.0819748	0.0825274	0.082569	0.0805932	0.0813812	0.0819134	0.0824844	0.0821334	0.082039	0.0818827	0.0822119	0.082329	0.0825755	0.0823125	0.0825274	0.0831721	0.0825935
YGL114W	0.0871869	0.0856747	0.08729	0.0883749	0.0867167	0.0859557	0.0874899	0.0862471	0.0880195	0.0850738	0.0857829	0.0866614	0.0874986	0.0872137	0.0865555	0.0862471	0.0869432	0.0869515	0.0875626	0.08729	0.087832	0.0880786	0.0885247
YGL115W	0.0750774	0.0733083	0.0739021	0.0752747	0.0745151	0.0742096	0.0748341	0.0732714	0.0743367	0.0746582	0.0740311	0.0743525	0.0750602	0.0749914	0.0743972	0.0732714	0.0745449	0.0745416	0.0751621	0.0749914	0.0753354	0.0753354	0.0745945
YGL116W	0.0804417	0.0820601	0.079782	0.0801469	0.0813189	0.0816993	0.0801304	0.0801149	0.0796054	0.0805404	0.0792222	0.079674	0.0800423	0.0803872	0.0802304	0.0812042	0.0812274	0.0799473	0.080247	0.0801451	0.0801149	0.0801149	0.0798076
YGL117W	0.161643	0.160828	0.161768	0.161105	0.16164	0.161768	0.160121	0.160515	0.16007	0.159458	0.161298	0.161708	0.16135	0.16149	0.160945	0.160515	0.160515	0.161093	0.161692	0.161141	0.161768	0.161768	0.163889
YGL119W	0.0968973	0.0959862	0.0974888	0.097116	0.100123	0.097851	0.0954226	0.096523	0.0952378	0.0958194	0.0968475	0.097026	0.0960361	0.0969959	0.0967919	0.095195	0.0988682	0.0957986	0.0968462	0.0968382	0.0967645	0.0967645	0.0974285
YGL120C	0.0701705	0.070476	0.0681204	0.0699643	0.068803	0.0687916	0.0693881	0.068024	0.0696061	0.068024	0.0674815	0.0688507	0.0696733	0.0697119	0.0685648	0.0693261	0.068772	0.0676233	0.0698686	0.0698324	0.0697601	0.0697601	0.0702498
YGL121C	0.0790026	0.0818335	0.0809274	0.0788945	0.0813648	0.0832737	0.0767904	0.0813648	0.0754382	0.0783301	0.0772091	0.07999	0.0789151	0.0800525	0.0800657	0.0813648	0.0813648	0.0803553	0.0789262	0.078886	0.0787402	0.0787402	0.0787402
YGL123W	0.0131373	0.0118114	0.0118373	0.014456	0.0127367	0.01224	0.0133707	0.0117647	0.0144213	0.0120507	0.0128359	0.0128229	0.0132462	0.0136529	0.0123853	0.0117647	0.0130441	0.0119658	0.0131012	0.0131445	0.0130719	0.0130719	0.0131389
YGL124C	0.10028	0.100158	0.0968027	0.0995454	0.1003	0.0991778	0.0997443	0.0972046	0.101406	0.0982866	0.0990421	0.0987304	0.0997541	0.100592	0.0990786	0.0982382	0.100262	0.0977612	0.0999178	0.0997599	0.100107	0.0997886	0.0997886
YGL127C	0.0677083	0.0675223	0.0662616	0.0677083	0.0653713	0.0643939	0.0676339	0.0677083	0.0677083	0.0662435	0.0662977	0.0677083	0.0675347	0.067853	0.0664983	0.0677083	0.0651042	0.0661058	0.0694477	0.068287	0.0695112	0.0677083	0.0680422
YGL128C	0.135146	0.138095	0.135608	0.13753	0.139991	0.139607	0.136074	0.14269	0.136691	0.137171	0.135526	0.136229	0.137856	0.136192	0.137137	0.140351	0.139181	0.136932	0.135882	0.135802	0.135673	0.135673	0.135942
YGL129C	0.106497	0.107157	0.106046	0.106758	0.108866	0.107236	0.106666	0.108715	0.107546	0.106428	0.105553	0.107096	0.106842	0.106456	0.106774	0.107976	0.108149	0.10718	0.106508	0.106497	0.106497	0.106497	0.106497
YGL130W	0.0756456	0.0751435	0.0749048	0.0747036	0.0746478	0.0745059	0.0752833	0.0747036	0.0751243	0.073843	0.0752151	0.0751383	0.0752212	0.0753879	0.075121	0.0739789	0.0746727	0.0751495	0.0755877	0.0754685	0.0761528	0.0754282	0.0754282
YGL133W	0.110002	0.109914	0.109166	0.111101	0.110943	0.110681	0.110056	0.109726	0.109826	0.109496	0.109584	0.110301	0.110234	0.110237	0.110052	0.110514	0.110816	0.109645	0.110343	0.110427	0.110251	0.110251	0.110494
YGL138C	0.162091	0.162051	0.157929	0.160053	0.158562	0.16051	0.159073	0.158414	0.163834	NaN	0.157974	0.15942	0.160335	0.159802	0.159528	0.159375	0.158618	0.158562	0.16045	0.160976	0.160335	0.160335	0.159744
YGL139W	0.0875373	0.0882756	0.0866909	0.0873285	0.0875814	0.087475	0.0865143	0.0862712	0.0887739	0.0861259	0.0860279	0.0874157	0.0871706	0.0865987	0.0871857	0.0866448	0.0869539	0.0867406	0.0871513	0.0871521	0.087475	0.0870599	0.0866022
YGL140C	0.0948879	0.0945314	0.0935983	0.0951101	0.0956429	0.0947099	0.0948555	0.0951743	0.0950663	0.0945265	0.0942499	0.0947976	0.0948966	0.0944924	0.0946461	0.0951743	0.0956775	0.0941462	0.0951082	0.095432	0.0949016	0.0949016	0.0957549
YGL141W	0.106721	0.106749	0.105651	0.107192	0.105713	0.105832	0.107005	0.105002	0.106615	0.106245	0.104834	0.106497	0.106487	0.105651	0.10578	0.105367	0.105196	0.104974	0.106887	0.106848	0.106912	0.106827	0.106799
YGL142C	0.132242	0.130147	0.132776	0.134768	0.1308	0.130618	0.133439	0.130909	0.130961	0.133259	0.130131	0.132154	0.132829	0.131472	0.131356	0.130376	0.131295	0.130253	0.134006	0.133961	0.134109	0.133576	0.133589
YGL143C	0.100282	0.100817	0.098497	0.099839	0.0992403	0.100132	0.0995399	0.099839	0.0994234	0.0986061	0.0987095	0.099954	0.099839	0.0989891	0.0992778	0.0990338	0.0990167	0.0993435	0.0997669	0.099839	0.100396	0.099839	0.0999628
YGL146C	0.123315	0.123447	0.121958	0.122177	0.123318	0.121416	0.121718	0.121212	0.124289	0.12285	0.120166	0.122415	0.122785	0.122238	0.12261	0.123263	0.123624	0.120897	0.122689	0.122523	0.122238	0.123263	0.123
YGL147C	0.03125	0.030754	0.0314429	0.0313521	0.0314281	0.03125	0.0307044	0.03125	0.031362	0.031901	0.0313465	0.0318287	0.0319444	0.0316358	0.0316007	0.03125	0.03125	0.03125	0.0315869	0.0313465	0.03125	0.03125	0.0325855
YGL148W	0.0710875	0.0711696	0.0701837	0.0704322	0.0696774	0.0696568	0.069016	0.0721485	0.070808	0.0704631	0.0687715	0.0705065	0.0704391	0.0703802	0.0696389	0.0703802	0.0694396	0.0701762	0.0704297	0.0704293	0.0703802	0.0703802	0.0704029
YGL150C	0.0938218	0.0927037	0.0925	0.0940706	0.0921512	0.0912423	0.0927729	0.0904485	0.0920538	0.0924904	0.0910964	0.0932425	0.0933984	0.0939962	0.0924461	0.0910267	0.0916433	0.0927621	0.0940373	0.0939255	0.0943272	0.0944765	0.0942277
YGL153W	0.112848	0.112536	0.111938	0.112468	0.111955	0.112727	0.111896	0.11342	0.110563	0.111218	0.111039	0.111742	0.111515	0.111833	0.111786	0.110563	0.112103	0.112248	0.112539	0.11252	0.112468	0.112468	0.11259
YGL154C	0.13224	0.134659	0.131732	0.132012	0.134811	0.134754	0.131868	0.133089	0.133089	0.131487	0.130783	0.132217	0.131624	0.131597	0.132966	0.13431	0.134362	0.131962	0.131941	0.132411	0.131868	0.133089	0.131899
YGL155W	0.115047	0.11614	0.114976	0.11526	0.118029	0.115646	0.115357	0.114409	0.114574	0.113905	0.114421	0.115827	0.115373	0.114315	0.115947	0.114409	0.118354	0.114998	0.115304	0.115779	0.11526	0.11526	0.114933
YGL156W	0.0877958	0.0879189	0.087393	0.0873588	0.0873509	0.0875545	0.0865505	0.0870513	0.0874183	0.0868015	0.0862441	0.0877542	0.0872973	0.0868976	0.0871445	0.0873588	0.0872803	0.0867911	0.0874047	0.0874784	0.0873588	0.0876663	0.0877215
YGL157W	0.109225	0.110808	0.109432	0.110706	0.109849	0.112877	0.109232	0.111661	0.110429	0.109661	0.107615	0.110524	0.110579	0.10922	0.10976	0.110706	0.109751	0.108622	0.111239	0.110494	0.111661	0.110706	0.110853
YGL159W	0.139842	0.137544	0.13723	0.138961	0.137701	0.13802	0.137258	0.13802	0.136931	0.140437	0.136897	0.138613	0.139324	0.137675	0.137895	0.13802	0.138909	0.138977	0.139572	0.139798	0.139524	0.139798	0.139
YGL161C	0.120286	0.119062	0.116773	0.118679	0.119806	0.118971	0.118862	0.117607	0.117676	0.118947	0.117116	0.118526	0.118536	0.117905	0.118441	0.119751	0.119294	0.120657	0.118795	0.118917	0.118679	0.118679	0.118789
YGL162W	0.13135	0.127213	0.130083	0.13051	0.127573	0.127353	0.128803	0.127253	0.127288	0.129571	0.129267	0.129678	0.12932	0.12916	0.128293	0.125038	0.127276	0.126401	0.129658	0.129406	0.129467	0.130575	0.130916
YGL163C	0.0926107	0.0926497	0.0914306	0.0915908	0.0932043	0.0924705	0.0920998	0.0912491	0.0912374	0.0919867	0.0910776	0.0917678	0.0919995	0.0918139	0.0916049	0.0923384	0.0934046	0.0902994	0.0922707	0.0923182	0.0924501	0.0923384	0.0913794
YGL164C	0.120354	0.119757	0.119224	0.121635	0.11622	0.116591	0.11969	0.115997	0.119651	0.116655	0.118518	0.120112	0.120644	0.118135	0.118637	0.117449	0.114637	0.117672	0.121454	0.121726	0.121806	0.12108	0.120391
YGL166W	0.143363	0.146386	0.141921	0.142287	0.146282	0.145213	0.143152	0.144543	0.143829	0.141823	0.142535	0.145034	0.142871	0.143805	0.144215	0.144543	0.1463	0.142501	0.143541	0.142904	0.144543	0.144543	0.143975
YGL167C	0.082661	0.0808934	0.0814985	0.0824332	0.081804	0.0817959	0.081642	0.0813816	0.0815625	0.0811407	0.0800088	0.0818156	0.0820827	0.081479	0.0814206	0.0813816	0.0813891	0.0799796	0.0820459	0.081849	0.0820827	0.0820827	0.0817771
YGL171W	0.0868267	0.0879625	0.0852399	0.0861599	0.0858792	0.0859835	0.0863935	0.0872684	0.0884463	0.0863114	0.0843238	0.0865113	0.0864047	0.086156	0.085924	0.0855017	0.0855518	0.0850486	0.0865411	0.0868758	0.0866795	0.0860906	0.0866946
YGL172W	0.0992169	0.0999552	0.0987051	0.0994382	0.101136	0.100435	0.0995835	0.10101	0.100035	0.098329	0.0988613	0.0993022	0.0995567	0.0995255	0.0997528	0.0996036	0.101115	0.0984135	0.099845	0.0999162	0.100036	0.0996036	0.0996397
YGL173C	0.0845586	0.0861506	0.0841396	0.0850679	0.0849486	0.0846598	0.0849832	0.0851315	0.0858497	0.0851795	0.0843509	0.0846683	0.0849729	0.0841347	0.0846598	0.0849153	0.0849199	0.0843499	0.0849218	0.0847952	0.085198	0.0846991	0.0851093
YGL174W	0.140302	0.139785	0.141231	0.141374	0.13922	0.139598	0.141265	0.138804	0.139126	0.140978	0.139983	0.140706	0.141134	0.139983	0.140027	0.141301	0.139016	0.139668	0.141408	0.141231	0.142069	0.141301	0.141301
YGL175C	0.110412	0.109823	0.108688	0.110501	0.108762	0.109564	0.110064	0.112542	0.110615	0.110464	0.10826	0.109973	0.109716	0.108313	0.109243	0.108688	0.109508	0.10854	0.109864	0.110561	0.108984	0.109651	0.110491
YGL176C	0.169108	0.167896	0.167663	0.16951	0.168183	0.164923	0.169228	0.16683	0.168029	0.168435	0.165238	0.168115	0.169228	0.165664	0.166691	0.16743	0.168412	0.164782	0.169727	0.169228	0.169551	0.169828	0.170412
YGL179C	0.125443	0.121611	0.124209	0.124505	0.121965	0.121504	0.12403	0.122163	0.123945	NaN	0.12241	0.123747	0.124381	0.122889	0.122091	0.12038	0.120658	0.121934	0.124639	0.124374	0.125317	0.12454	0.124387
YGL184C	0.0863962	0.0887516	0.0864438	0.0868506	0.0877461	0.0882429	0.0859874	0.0888282	0.0873745	0.0867717	0.0860961	0.086512	0.08611	0.0860862	0.0868939	0.0895435	0.087915	0.0863521	0.0861324	0.085967	0.085967	0.085967	0.0860954
YGL185C	0.113743	0.111466	0.113889	0.114757	0.112303	0.11244	0.114386	0.111404	0.1118	0.113487	0.11183	0.113993	0.114035	0.113402	0.111639	0.112281	0.11215	0.108637	0.114092	0.113986	0.114912	0.114035	0.114125
YGL190C	0.0494949	0.0483023	0.0489501	0.0509299	0.0491305	0.0491507	0.0486348	0.0488121	0.0493328	0.0489673	0.0477776	0.0490486	0.048688	0.0489156	0.0485237	0.0500536	0.0496845	0.0473319	0.0488909	0.0489156	0.0488121	0.0500536	0.0494488
YGL191W	0.0877156	0.0893273	0.0863766	0.0869464	0.0910227	0.0902098	0.0873127	0.0897669	0.0921573	0.0867861	0.0855575	0.0871906	0.0867754	0.0860917	0.0881637	0.0895105	0.09202	0.0859602	0.0868794	0.0869464	0.0869464	0.0869464	0.0869464
YGL192W	0.106455	0.105164	0.10446	0.106558	0.105911	0.105868	0.104847	0.105137	0.107936	0.106252	0.101626	0.104179	0.104688	0.103232	0.104343	0.104039	0.105207	0.104461	0.104252	0.104183	0.103586	0.103589	0.106784
YGL194C	0.0774801	0.0769426	0.0769691	0.0789232	0.0758133	0.0769951	0.0770123	0.0776641	0.0776403	0.077871	0.0757343	0.0776195	0.0776819	0.0763002	0.0761877	0.0769282	0.0757384	0.0746127	0.0776661	0.0775674	0.077731	0.077731	0.0776641
YGL195W	0.0993351	0.0993827	0.0990536	0.1005	0.0992039	0.0993572	0.100055	0.0991645	0.100593	0.0996165	0.0960521	0.0999305	0.100046	0.0981391	0.0987683	0.0987904	0.0992323	0.0973803	0.100216	0.100086	0.100344	0.100162	0.100571
YGL196W	0.112962	0.110198	0.111641	0.114506	0.112871	0.110263	0.113419	0.110475	0.115267	0.113438	0.108662	0.113805	0.113791	0.11177	0.110954	0.111491	0.111864	0.110356	0.113578	0.113756	0.113524	0.113583	0.113803
YGL197W	0.103037	0.102691	0.100964	0.10394	0.102904	0.102063	0.103074	0.101558	0.103449	0.103825	0.100467	0.103465	0.10359	0.102435	0.101623	0.100719	0.102604	0.100519	0.103864	0.102658	0.103783	0.104228	0.104011
YGL198W	0.113842	0.116525	0.113748	0.116152	0.116399	0.115434	0.113115	0.114407	0.117232	0.113833	0.113112	0.113398	0.112994	0.113151	0.11375	0.114407	0.114527	0.112125	0.113516	0.113073	0.112994	0.112994	0.114588
YGL200C	0.0772059	0.0772409	0.0768519	0.0786621	0.0771661	0.0769756	0.078338	0.0738562	0.075701	0.0775327	0.0767384	0.0776688	0.0772331	0.0769426	0.0766125	0.0771242	0.0772285	0.0761187	0.0774168	0.0771242	0.0771242	0.0771242	0.0791352
YGL201C	0.084813	0.0849218	0.0840074	0.0839652	0.0859125	0.0859967	0.0835007	0.0836589	0.0848769	0.084653	0.0833288	0.0841323	0.0837457	0.0839137	0.0843476	0.0846354	0.0858405	0.0829873	0.0837699	0.0840025	0.0836589	0.0833333	0.0843349
YGL202W	0.0859886	0.0855562	0.0841516	0.086515	0.0851553	0.0853445	0.0859459	0.0845582	0.0899023	0.086575	0.0850202	0.0857558	0.0861106	0.0859258	0.0851025	0.0852235	0.0851527	0.0839952	0.0859658	0.0859258	0.0858888	0.0865542	0.0859741
YGL205W	0.102885	0.103933	0.10237	0.102829	0.103776	0.104144	0.102479	0.103901	0.103027	0.104096	0.102	0.102547	0.102627	0.102321	0.102945	0.103012	0.104384	0.102294	0.102725	0.102889	0.102568	0.102568	0.103514
YGL206C	0.0813324	0.0804152	0.0807986	0.0810342	0.0808439	0.081061	0.0808602	0.0801505	0.0811585	0.0813336	0.0791656	0.081009	0.0809146	0.0808071	0.0803751	0.0807514	0.0805383	0.0795803	0.0809815	0.0810519	0.0808524	0.0809517	0.0813421
YGL207W	0.0870378	0.0864035	0.0858813	0.0868571	0.0861451	0.0862477	0.0863093	0.0863461	0.0879548	0.0867583	0.0843307	0.0865146	0.0865606	0.0863997	0.0856432	0.0859073	0.0857437	0.0854753	0.086543	0.0864355	0.0862966	0.0866678	0.0868906
YGL209W	0.0754774	0.078218	0.0760995	0.075674	0.0779915	0.0762311	0.0753968	0.0755208	0.0758009	0.076199	0.0745322	0.0761409	0.075463	0.0759066	0.0761785	0.0763889	0.0789746	0.0749866	0.0758188	0.075762	0.0755208	0.0763889	0.0755653
YGL210W	0.046861	0.0461243	0.0452583	0.046162	0.0453413	0.0451148	0.0455264	0.044843	0.0463378	0.0461977	0.0456942	0.0460531	0.0461385	0.0457565	0.045447	0.044843	0.044843	0.0462228	0.0464382	0.0463378	0.0463378	0.0463378	0.0458779
YGL211W	0.0938805	0.0922829	0.0933969	0.0964349	0.0941488	0.0916667	0.0932852	0.0954545	0.0936027	0.0945576	0.0928054	0.0940877	0.09422	0.0946315	0.0932941	0.0945286	0.0945286	0.0948847	0.0954338	0.095043	0.0954545	0.0954545	0.0948135
YGL213C	0.074113	0.0736284	0.0721029	0.0762905	0.0716734	0.0731689	0.0759795	0.0712654	0.0736699	0.0773898	0.0738594	0.0765298	0.075453	0.0749412	0.0732027	0.0721029	0.0721029	0.0731337	0.0764749	0.0760114	0.0771281	0.0762905	0.0770851
YGL216W	0.106633	0.107992	0.106198	0.107109	0.107531	0.107505	0.106525	0.108283	0.107573	0.106631	0.105374	0.106692	0.10649	0.105952	0.106715	0.107876	0.10726	0.10728	0.106835	0.106721	0.106841	0.106653	0.106685
YGL219C	0.0934727	0.0934727	0.0925889	0.0931324	0.0949559	0.0938671	0.0931215	0.0927496	0.0948255	0.0932467	0.0924383	0.0924742	0.0930388	0.0926291	0.0932267	0.0927496	0.0949034	0.0944739	0.0934916	0.0934325	0.0934727	0.0927496	0.0932131
YGL221C	0.113379	0.112992	0.113033	0.112966	0.113152	0.113138	0.113066	0.113033	0.116494	0.113142	0.113098	0.113308	0.112957	0.113546	0.112975	0.11188	0.113107	0.113743	0.113055	0.113162	0.113033	0.113033	0.113033
YGL222C	0.104528	0.0989276	0.0999197	0.100774	0.101619	0.0991736	0.102012	0.098657	0.102445	0.104161	0.0982098	0.101092	0.100803	0.100446	0.0997666	0.100551	0.100591	0.0993855	0.101799	0.101498	0.101425	0.100551	0.102348
YGL223C	0.139644	0.140755	0.140464	0.140688	0.141949	0.140351	0.140823	0.139843	0.140898	0.140516	0.13857	0.140679	0.140056	0.140242	0.140465	0.140641	0.142185	0.139475	0.140349	0.140065	0.140808	0.140641	0.139843
YGL224C	0.0967972	0.0962172	0.098109	0.0963645	0.0970587	0.0992128	0.0960176	0.0960854	0.0949374	0.0962708	0.0964314	0.0971022	0.0962436	0.0964808	0.0971039	0.0972716	0.0972969	0.0978191	0.0962138	0.0962172	0.0960854	0.0960854	0.0964504
YGL225W	0.0653846	0.065286	0.0649573	0.0643578	0.0662469	0.0665412	0.0643562	0.065286	0.0663676	0.0652244	0.0640259	0.0649573	0.0642998	0.0644642	0.0651665	0.065286	0.0662512	0.065817	0.0643734	0.0642998	0.0642998	0.0642998	0.0644262
YGL226W	0.107906	0.103259	0.107622	0.110459	0.104738	0.106549	0.108002	0.102395	0.107771	0.109955	0.104784	0.110075	0.109384	0.111206	0.106386	0.102395	0.104282	0.10467	0.110249	0.108817	0.110459	0.110459	0.110459
YGL229C	0.106236	0.106179	0.105004	0.106201	0.105009	0.104948	0.10471	0.10444	0.106435	0.106523	0.104462	0.10634	0.105558	0.106391	0.105315	0.103704	0.104508	0.105423	0.106352	0.106502	0.106282	0.106835	NaN
YGL231C	0.111169	0.111967	0.112701	0.113962	0.114364	0.113962	0.113064	0.113962	0.112216	0.11358	0.111756	0.112549	0.112449	0.112216	0.112816	0.113962	0.114927	0.113827	0.112203	0.112216	0.112216	0.112216	0.112216
YGL233W	0.085083	0.085543	0.0845077	0.0856867	0.0848142	0.084456	0.0847145	0.084589	0.0861116	0.0842803	0.0836794	0.0849898	0.0844915	0.0848939	0.0841751	0.0853208	0.0847681	0.0845327	0.0848443	0.0849346	0.0849549	0.0849549	0.0839135
YGL234W	0.0682784	0.0693025	0.0682602	0.0684418	0.0690493	0.0689617	0.0690137	0.0688503	0.0699572	0.0686333	0.0678858	0.0683834	0.0679243	0.0683964	0.0684253	0.0684418	0.0689806	0.0686932	0.068175	0.068351	0.0680333	0.0680333	0.0690807
YGL236C	0.110398	0.11167	0.109613	0.111229	0.109298	0.110181	0.109403	0.111493	0.111351	0.112177	0.107333	0.110308	0.110464	0.110884	0.109603	0.11	0.109936	0.109541	0.110746	0.110608	0.110995	0.110995	0.110995
YGL238W	0.0776827	0.0782723	0.0772221	0.0775021	0.077941	0.0782329	0.0770211	0.078359	0.0790528	0.0780772	0.0768608	0.0775662	0.0773416	0.0774533	0.0776373	0.078359	0.0776579	0.0778788	0.0774272	0.0774726	0.0773184	0.0776653	0.0778254
YGL240W	0.111487	0.110463	0.112882	0.114366	0.110226	0.111433	0.111781	0.110226	0.102258	0.111512	0.111019	0.112945	0.113324	0.112956	0.1115	0.110226	0.110226	0.111554	0.113214	0.113177	0.114312	0.112882	0.111554
YGL241W	0.13441	0.135599	0.134251	0.135235	0.135318	0.135123	0.13444	0.134271	0.136064	0.135512	0.133766	0.134827	0.134873	0.134833	0.134777	0.134962	0.135713	0.134969	0.134907	0.134962	0.135319	0.135293	0.134018
YGL242C	0.0806777	0.0830063	0.0812983	0.0842491	0.0824176	0.0830836	0.081842	0.0824176	0.0822994	0.083505	0.0821378	0.0816036	0.0822955	0.0814001	0.0825511	0.0824176	0.0824176	0.0817132	0.0825406	0.0830281	0.0842491	0.0842491	0.0842491
YGL244W	0.0781948	0.078288	0.0786034	0.0794368	0.0787605	0.0791006	0.0791607	0.0792624	0.0795302	0.0775572	0.0785786	0.0785563	0.0787879	0.0786034	0.0783457	0.0798555	0.0801457	0.0788974	0.0788318	0.078867	0.0789886	0.0786693	0.0807376
YGL245W	0.0687118	0.0693633	0.0667607	0.0707431	0.0692407	0.0701372	0.0694069	0.0681711	0.0686413	0.0695522	0.0682626	0.0708292	0.070992	0.0713838	0.0695181	0.0704791	0.07045	0.0686281	0.0708622	0.0710442	0.071209	0.0719323	0.0699673
YGL246C	0.106888	0.107355	0.106468	0.106221	0.10862	0.107779	0.105293	0.105514	0.106401	0.107152	0.105323	0.106905	0.106831	0.106516	0.106616	0.106373	0.107324	0.107695	0.107005	0.106707	0.107232	0.107232	0.106814
YGL247W	0.135591	0.13351	0.131653	0.136715	0.132397	0.132997	0.133294	0.129783	0.139884	0.136517	0.130952	0.135795	0.136629	0.136517	0.133343	0.131466	0.131502	0.131855	0.136736	0.136984	0.136517	0.1382	0.136517
YGL248W	0.0909746	0.0930502	0.0931067	0.0913668	0.0931645	0.0933661	0.0929589	0.0911548	0.0936831	0.0918586	0.0893029	0.0908703	0.0907944	0.0906042	0.0913682	0.0947584	0.0947584	0.0917785	0.0912287	0.0921057	0.092125	0.0920557	0.0920557
YGL249W	0.161254	0.163989	0.162727	0.163559	0.163056	0.163441	0.163921	0.163226	0.163378	0.162354	0.160715	0.16273	0.162973	0.163068	0.162622	0.163698	0.164212	0.162353	0.163365	0.16362	0.163698	0.163226	0.163298
YGL250W	0.101765	0.101779	0.103187	0.102592	0.101288	0.102957	0.100986	0.10527	0.103931	0.103973	0.101848	0.103421	0.101967	0.101923	0.102264	0.101253	0.104045	0.101459	0.102932	0.10341	0.102592	0.103931	0.103931
YGL252C	0.0763106	0.0754213	0.077301	0.0762857	0.0744351	0.0752688	0.0761611	0.0758862	0.0759227	0.077637	0.0752338	0.0758053	0.0754335	0.0756032	0.0752174	0.0747543	0.0742486	0.0741884	0.0758693	0.0758862	0.0758862	0.0764521	0.0753493
YGL253W	0.0482577	0.0502769	0.0482235	0.048304	0.0503646	0.0499036	0.0501987	0.0502769	0.04946	0.049678	0.0477102	0.0483539	0.0484517	0.0485657	0.0491016	0.0502769	0.0503497	0.0505402	0.0483359	0.0483756	0.0482235	0.0482235	0.048908
YGR003W	0.124183	0.125725	0.125784	0.128722	0.12723	0.126711	0.126763	0.126315	0.12748	0.124238	0.126037	0.12816	0.126547	0.126533	0.126852	0.126315	0.126038	0.123571	0.128735	0.128951	0.128725	0.128491	0.128201
YGR004W	0.0947804	0.0959838	0.0934325	0.0957523	0.0934079	0.0949669	0.0940039	0.0928726	0.0959149	0.0948074	0.0951824	0.0959923	0.0942165	0.0935525	0.0939198	0.0950324	0.0934853	0.0924849	0.0957577	0.0957523	0.095697	0.0957523	0.0960292
YGR005C	0.0764963	0.0771064	0.075142	0.0759793	0.0753865	0.0762852	0.0758566	0.075833	0.0768226	0.0760662	0.0753032	0.0761488	0.0761646	0.0756026	0.0756487	0.0766621	0.0752155	0.075833	0.0758732	0.075833	0.0761519	0.075833	0.0762794
YGR006W	0.121571	0.121854	0.121352	0.122191	0.121808	0.121571	0.121496	0.121571	0.120339	0.121901	0.1217	0.121258	0.121659	0.121718	0.121718	0.122889	0.12202	0.121571	0.121601	0.121571	0.121571	0.121571	0.121808
YGR007W	0.114207	0.113884	0.111875	0.115133	0.112126	0.112327	0.113692	0.113075	0.115199	0.114168	0.111446	0.114986	0.113898	0.112961	0.113127	0.113075	0.112046	0.111888	0.115259	0.115247	0.115529	0.116162	0.115159
YGR008C	0.0980392	0.0955182	0.0980392	0.0980392	0.0969574	0.102674	0.0983754	0.0941176	0.0980392	0.0919118	0.0988017	0.0980392	0.0975163	0.0980392	0.0977619	0.105882	0.100876	0.0959276	0.0981124	0.0980392	0.0980392	0.0980392	0.0980392
YGR009C	0.106954	0.107938	0.107144	0.108495	0.106718	0.107883	0.107219	0.107539	0.107899	0.107602	0.105824	0.107926	0.107336	0.107144	0.107159	0.107539	0.108144	0.106913	0.107605	0.107482	0.107539	0.107539	0.108021
YGR012W	0.105399	0.105302	0.104779	0.106753	0.105994	0.10583	0.105689	0.106753	0.106753	0.105191	0.104203	0.106431	0.105907	0.105484	0.105582	0.105907	0.105403	0.10467	0.106759	0.1068	0.106753	0.106753	0.106731
YGR015C	0.111645	0.11245	0.109599	0.110891	0.11354	0.1135	0.110654	0.112593	0.114718	0.109505	0.109447	0.11131	0.111063	0.111151	0.111212	0.11267	0.113867	0.11052	0.110701	0.110597	0.110597	0.111595	0.110597
YGR016W	0.10119	0.101601	0.0990181	0.103695	0.0997937	0.100587	0.0992453	0.0997937	0.10182	0.102946	0.0987515	0.102453	0.0987466	0.0985333	0.0991705	0.0997937	0.0991996	0.0979143	0.101401	0.101442	0.101539	0.0997937	0.101584
YGR017W	0.0630333	0.0666725	0.0627175	0.0625317	0.0674769	0.0678018	0.0626909	0.0681058	0.0670629	0.0634026	0.0627794	0.0633811	0.0639438	0.0637704	0.0642771	0.066991	0.0680584	0.0636465	0.0626939	0.0625317	0.0625317	0.0625317	0.0632463
YGR019W	0.0721944	0.0745905	0.0717236	0.0732537	0.0719499	0.0727401	0.0732537	0.0725475	0.0726386	0.0727461	0.0723906	0.0731192	0.072265	0.0731753	0.0727881	0.0718413	0.0718413	0.0720043	0.073338	0.073293	0.0732537	0.0732537	0.0750464
YGR020C	0.0645658	0.0644258	0.0644258	0.0644258	0.0641385	0.0644258	0.0645058	0.0644258	0.0644258	0.0644258	0.0645036	0.0645592	0.0644258	0.0645814	0.0645672	0.0644258	0.0644258	0.0644258	0.0644362	0.0644258	0.0644258	0.0644258	0.0644258
YGR021W	0.114204	0.112633	0.112524	0.115275	0.114271	0.114277	0.113304	0.116151	0.113121	0.11386	0.112635	0.113697	0.113326	0.113988	0.113421	0.115006	0.115323	0.112098	0.113912	0.11386	0.11386	0.11386	0.114976
YGR028W	0.0818016	0.0827996	0.0812232	0.0815276	0.0824408	0.0804483	0.0812406	0.0824408	0.0821168	0.0814705	0.0816418	0.0815276	0.0816494	0.0821364	0.0815645	0.0806144	0.0829266	0.0808954	0.0816366	0.0816291	0.0815276	0.0824408	0.081832
YGR032W	NaN	0.0776144	0.0770973	0.0784293	0.0779295	0.0784049	0.0777452	0.0785326	0.0775133	0.0780718	0.0768918	0.0782484	0.0780528	0.0777817	0.0779236	0.0788836	0.0780583	0.0771576	0.078359	0.0783668	0.0783975	0.0785326	0.0785596
YGR033C	0.111333	NaN	0.110249	0.111604	0.110284	NaN	0.109633	NaN	0.111604	0.110649	0.109722	0.111217	0.111785	0.111077	0.110363	0.112959	0.110537	NaN	0.111503	0.111679	0.111604	0.111604	0.110666
YGR035C	NaN	0.138483	0.134877	0.135428	0.137037	0.137948	0.13588	0.140657	0.138327	0.136735	0.134806	0.135474	0.135522	0.135494	0.135818	0.136869	0.136724	0.13649	0.135163	0.135101	0.135101	0.135101	0.135172
YGR036C	0.0954235	0.094555	0.0950971	0.0972356	0.0974849	0.0974913	0.0957845	0.0983607	0.096025	0.0943504	0.0947746	0.0967994	0.0965392	0.0965392	0.0964012	0.0969945	0.0974305	0.095103	0.0970047	0.0969945	0.0969945	0.0969945	0.0962239
YGR037C	0.0416667	0.0435606	0.042298	0.0416667	0.041958	0.0416667	0.0416667	0.0416667	0.0454545	0.0416667	0.0416667	0.0423882	0.0419192	0.0418771	0.0417432	0.0416667	0.0416667	0.0416667	0.0416525	0.0416667	0.0416667	0.0416667	0.0424437
YGR038W	0.0743814	0.0757954	0.073508	0.0744071	0.0748703	0.0748974	0.0744438	0.0756914	0.0742358	0.0742358	0.0739326	0.0742358	0.0743328	0.0742358	0.0743387	0.0742358	0.0742358	0.0742358	0.0742521	0.0742358	0.0742358	0.0742358	0.0753182
YGR040W	0.0864047	0.0869467	0.0865201	0.0866146	0.0885038	0.0889382	0.0866692	0.0894309	0.08946	0.0867491	0.0866832	0.0866348	0.0872629	0.0867209	0.0874873	0.0885276	0.0885468	0.0869988	0.0867546	0.0867209	0.0867209	0.0867209	0.0867209
YGR041W	0.156066	0.153907	0.153349	0.156456	0.15526	0.154722	0.153642	0.154667	0.157964	0.155618	0.152293	0.15626	0.156492	0.155478	0.154899	0.152234	0.155457	0.153263	0.156578	0.156458	0.156492	0.156492	0.156716
YGR042W	0.169504	0.170024	0.169201	0.170734	0.171983	0.173223	0.168006	0.171019	0.173561	0.169428	0.164369	0.169749	0.170615	0.168864	0.170418	0.171019	0.172154	0.165332	0.170192	0.169875	0.170087	0.169807	0.1699
YGR043C	0.0966703	0.0952089	0.0942862	0.0961713	0.0950709	0.0953547	0.0952018	0.0941753	0.0960425	0.0963272	0.0933436	0.0957911	0.0960382	0.0950624	0.0949213	0.0941753	0.0948548	0.0932541	0.096242	0.0961713	0.0961713	0.0961713	0.096811
YGR046W	0.0901437	0.0905195	0.0903116	0.0912739	0.0913338	0.0915371	0.0905816	0.089496	0.0901088	0.0897659	0.0901437	0.0909764	0.0908201	0.0908873	0.0908655	0.0903596	0.0915538	0.0896289	0.0912199	0.0911751	0.0912231	0.0920867	0.0903374
YGR047C	0.0964032	0.0965817	0.09504	0.0952465	0.0958805	0.0957776	0.0957169	0.0953646	0.0981705	0.0964803	0.0941519	0.09572	0.0962301	0.0960317	0.0959481	0.0986103	0.095696	0.0945406	0.0960744	0.0961038	0.0960886	0.0963383	0.0963716
YGR048W	0.0981333	0.099029	0.0965223	0.0960499	0.0983915	0.0986104	0.0971873	0.0962665	0.0995933	0.0978204	0.0967525	0.0973627	0.0980468	0.0970339	0.0974385	0.0981082	0.0981082	0.0978248	0.0972217	0.0976989	0.0978957	0.0971873	0.0970221
YGR049W	0.085195	0.0854863	0.0857959	0.0851064	0.0869249	0.0878466	0.0859676	0.0868794	0.0865935	0.0855496	0.0852295	0.0861196	0.086052	0.0864854	0.0855899	0.0886525	0.0886525	0.0852428	0.0852056	0.0851064	0.0851064	0.0851064	0.0851518
YGR052W	0.0983402	0.101068	0.09863	0.101609	0.100052	0.100401	0.100022	0.0982156	0.0998156	0.0985529	0.0984212	0.0987212	0.0984969	0.0990185	0.0990209	0.100072	0.102631	0.0976362	0.100974	0.101725	0.102125	0.101921	0.0984297
YGR053C	0.159582	0.16156	0.157117	0.158808	0.158847	0.156637	0.158643	0.160051	0.158878	0.158988	0.157052	0.158374	0.158956	0.158943	0.15851	0.158878	0.159976	0.158516	0.158842	0.158747	0.158878	0.158878	0.158908
YGR054W	0.0803059	0.0825965	0.0792574	0.08131	0.0797916	0.0821999	0.0810635	0.081493	0.080896	0.0806668	0.0795562	0.0808018	0.0816658	0.0807154	0.0806081	0.0809746	0.079651	0.0801771	0.0816516	0.081781	0.0816525	0.081493	0.0822108
YGR055W	0.0836601	0.0828816	0.0817688	0.0833992	0.0842242	0.0833729	0.08354	0.0836891	0.0845119	0.0836143	0.0819499	0.083551	0.0840369	0.0830771	0.0832382	0.0822661	0.0842564	0.0826188	0.0839659	0.0842366	0.0841796	0.0836891	0.0835107
YGR056W	0.100215	0.0994323	0.0984815	0.0999979	0.0999385	0.0990463	0.0990538	0.0981024	0.100482	0.0983597	0.0975703	0.0996709	0.0997971	0.0987787	0.0990825	0.0973863	0.0997478	0.0986808	0.0999661	0.100052	0.100196	0.0998926	0.100664
YGR057C	0.0735254	0.0704977	0.0733882	0.0740741	0.075692	0.0733259	0.0738781	0.0727023	0.0713306	0.0727023	0.0717116	0.0736168	0.0740741	0.0736168	0.0730626	0.0727023	0.0765841	0.073441	0.0740536	0.0742265	0.0740741	0.0740741	0.0727394
YGR058W	0.0988591	0.0975057	0.0983796	0.0996148	0.0982906	0.0973124	0.0997449	0.0972222	0.100006	0.0968192	0.0977596	0.0992063	0.0990079	0.0987654	0.0985149	0.0982143	0.0991219	0.0983669	0.0992138	0.0992063	0.0990537	0.0992063	0.09913
YGR059W	0.106073	0.107115	0.104787	0.105806	0.106136	0.105358	0.106247	0.104353	0.108671	0.106714	0.10466	0.105962	0.105913	0.105039	0.105469	0.106303	0.107056	0.103804	0.105862	0.105653	0.106203	0.106303	0.10567
YGR060W	0.0372532	0.036416	0.0369067	0.0390432	0.0376419	0.0365591	0.0377908	0.0360704	0.0382209	0.0377169	0.036608	0.0381185	0.0376474	0.0375638	0.0371348	0.0360704	0.0362763	0.0368148	0.0377876	0.0385793	0.0389653	0.0371457	0.0372008
YGR061C	0.0800935	0.0803914	0.0790261	0.0794811	0.0808777	0.0797145	0.0794073	0.0798253	0.0794399	0.080092	0.0791344	0.0794886	0.0794839	0.079446	0.0795741	0.0800692	0.080754	0.0793751	0.0795359	0.079446	0.0796377	0.0793376	0.0799254
YGR062C	0.120935	0.12083	0.120596	0.122314	0.122232	0.122742	0.12077	0.12104	0.123102	0.120762	0.11988	0.12073	0.12083	0.120947	0.12084	0.12083	0.121859	0.120749	0.121049	0.121648	0.121153	0.121881	0.12056
YGR063C	0.0841424	0.0844891	0.0843222	0.0841424	0.0843084	0.0844366	0.083865	0.0841424	0.0852907	0.0842435	0.0833333	0.0836801	0.0839266	0.0841424	0.0836847	0.0841424	0.0841424	0.0823998	0.0841545	0.0841424	0.0841424	0.0841424	0.0841424
YGR065C	0.0902405	0.0895718	0.0872247	0.0911822	0.0884381	0.0891746	0.0897561	0.0912152	0.0931702	0.0901805	0.0877001	0.0902532	0.0904295	0.0907787	0.0888175	0.0912152	0.0893287	0.0866827	0.0906645	0.0906852	0.091172	0.090654	0.0928396
YGR066C	0.126994	0.125869	0.127691	0.127615	0.127288	0.129046	0.127302	0.125747	0.126954	NaN	0.126125	0.127907	0.126819	0.127826	0.126847	0.125747	0.127291	0.12409	0.128054	0.127007	0.128015	0.128015	NaN
YGR067C	0.11649	0.115801	0.114989	0.11509	0.116373	0.116262	0.115235	0.11484	0.116077	0.115972	0.114071	0.115663	0.115459	0.116174	0.115309	0.116037	0.11757	0.114037	0.115461	0.115326	0.115465	0.115212	0.115613
YGR071C	0.14613	0.146504	0.143806	0.145842	0.146299	0.146406	0.145146	0.145322	0.147259	0.145731	0.144237	0.14534	0.145424	0.145942	0.145437	0.146476	0.14605	0.144196	0.145735	0.145685	0.145914	0.145706	0.145331
YGR072W	0.119974	0.119215	0.116835	0.120392	0.119251	0.118953	0.118345	0.119888	0.119252	0.118763	0.117365	0.119194	0.11886	0.118983	0.118962	0.119031	0.119031	0.116197	0.120236	0.119793	0.119888	0.120745	0.119998
YGR074W	0.0943311	0.095562	0.0938524	0.0975057	0.0941334	0.0956504	0.0945902	0.0952381	0.0953844	0.0973639	0.0947342	0.0966418	0.0956916	0.095868	0.09478	0.0952381	0.0952863	0.0940171	0.0973026	0.0966238	0.0975057	0.0975057	0.09518
YGR075C	0.104109	0.105004	0.104094	0.104242	0.105097	0.105697	0.105233	0.106909	0.104328	0.104242	0.104539	0.104369	0.104242	0.105946	0.105118	0.105576	0.105576	0.104242	0.104357	0.104242	0.104242	0.104242	0.104311
YGR076C	0.0944421	0.0876966	0.088224	0.0928157	0.088224	0.088224	0.0907557	0.088224	0.0908101	0.0927071	0.0889565	0.0898314	0.0913182	0.0905681	0.0898223	0.0903337	0.088224	0.0891977	0.0925458	0.0924434	0.0924434	0.0924434	0.0944391
YGR077C	0.146284	0.144848	0.144793	0.146463	0.145904	0.145982	0.144788	0.14527	0.146669	0.146272	0.144184	0.145989	0.145714	0.146021	0.145358	0.14527	0.147252	0.144534	0.146859	0.146428	0.146396	0.146959	0.146483
YGR078C	0.104917	0.107321	0.103426	0.10549	0.103504	0.103636	0.10419	0.105	0.107151	0.107135	0.102917	0.105159	0.104556	0.104722	0.104327	0.108333	0.10344	0.105128	0.105106	0.105741	0.105	0.105	0.105
YGR080W	0.103435	0.100032	0.10145	0.106406	0.0999998	0.101101	0.1036	0.101283	0.104286	0.105006	0.0983218	0.105335	0.10462	0.10145	0.101688	0.102284	0.100772	0.101283	0.105552	0.105343	0.10675	0.105287	0.103003
YGR081C	0.12086	0.121797	0.120079	0.123104	0.118796	0.119345	0.120646	0.120781	0.122718	0.122114	0.116634	0.123565	0.121729	0.120167	0.11976	0.119201	0.119201	0.119323	0.122391	0.122361	0.122361	0.122361	0.122361
YGR082W	0.0629529	0.0650233	0.064211	0.0640452	0.0671219	0.0673584	0.0651139	0.063587	0.0639317	0.0653306	0.06406	0.0647861	0.0652174	0.0652174	0.0651808	0.067029	0.0697271	0.0638239	0.0651904	0.0654187	0.0652174	0.0652174	0.0654032
YGR083C	0.0985266	0.0989605	0.0959261	0.0981648	0.0977367	0.0978236	0.0971885	0.0976843	0.0986723	0.0984022	0.0959261	0.0978302	0.0977864	0.0977127	0.0977989	0.0971739	0.0990202	0.0972917	0.097931	0.0981381	0.0981948	0.0981948	0.0981948
YGR085C	0.0690823	0.0682251	0.0668494	0.0682251	0.0680786	0.0682251	0.0681163	0.0663203	0.0682251	0.0683442	0.0681193	0.0689507	0.0686061	0.0678018	0.0677249	0.0682251	0.0682656	0.0664669	0.0683388	0.0682251	0.0701299	0.0682251	0.0682251
YGR086C	0.0579716	0.0608006	0.0577971	0.0583929	0.0612979	0.0594144	0.0584197	0.0602656	0.0593595	0.0590659	0.0575866	0.0594184	0.0589547	0.0595373	0.0592725	0.0602656	0.0621582	0.0576006	0.0583316	0.0583409	0.0583929	0.0583929	0.0581768
YGR088W	0.0874509	0.0895231	0.0856253	0.0871636	0.085724	0.0896173	0.087675	0.0914473	0.0882196	0.0889681	0.0855925	0.0876976	0.0872634	0.0869082	0.0869919	0.0902632	0.091145	0.0866653	0.0871615	0.0869411	0.0869841	0.088487	0.0876369
YGR089W	0.107731	0.107249	0.105887	0.108028	0.107237	0.106948	0.108215	0.107109	0.10831	0.107263	0.106163	0.107633	0.10737	0.107563	0.107063	0.106754	0.107978	0.106754	0.107594	0.108076	0.107847	0.107109	0.108493
YGR091W	0.134035	0.135489	0.133102	0.13512	0.136907	0.137219	0.134735	0.137097	0.13766	0.134304	0.133345	0.135177	0.134453	0.134483	0.134687	0.135753	0.137326	0.134409	0.134429	0.134035	0.134719	0.134409	0.135511
YGR092W	0.0869417	0.0875624	0.086454	0.0874123	0.0873956	0.0878999	0.0875409	0.0896421	0.0857473	0.0874198	0.0866871	0.0869974	0.0871995	0.0871432	0.0870243	0.0867385	0.0882459	0.0870918	0.0874068	0.0875831	0.0873151	0.0870024	0.0892955
YGR093W	0.136832	0.134423	0.135326	0.136525	0.137544	0.134634	0.136996	0.137258	0.136623	0.136254	0.135937	0.13654	0.136821	0.136675	0.13576	0.136602	0.137384	0.136299	0.136671	0.136456	0.13635	0.136602	0.136619
YGR094W	0.0702422	0.0699344	0.0692213	0.0698362	0.0695367	0.0691545	0.0699107	0.070634	0.0701479	0.0700407	0.0687294	0.0699559	0.069549	0.0701652	0.0695898	0.0703326	0.0697747	0.0694516	0.0700177	0.069981	0.0702167	0.0700312	0.0701394
YGR097W	0.0982609	0.0993271	0.0963768	0.0986701	0.0982534	0.0995257	0.0976646	0.0988406	0.100496	0.0994384	0.0965258	0.0983161	0.0975072	0.0986151	0.0982228	0.0988406	0.0997471	0.0978149	0.0983377	0.0983736	0.0985284	0.0988406	0.0986107
YGR099W	0.138453	0.138088	0.136987	0.139587	0.137571	0.138315	0.139518	0.13814	0.141019	0.139512	0.136196	0.138484	0.13814	0.138997	0.137911	0.138622	0.138345	0.13788	0.139657	0.139453	0.139884	0.139587	0.139105
YGR100W	0.0939474	0.0932488	0.0920916	0.0948865	0.0920587	0.0923749	0.0944606	0.0925979	0.0928693	0.09446	0.0914734	0.093833	0.0930419	0.0944089	0.0928776	0.0925979	0.0922176	0.0909262	0.0947219	0.0947204	0.0949436	0.094701	0.0951234
YGR101W	0.103345	0.101005	0.10152	0.103299	0.101384	0.100952	0.103647	0.101039	0.105161	0.10305	0.101439	0.103601	0.102384	0.102747	0.101835	0.101039	0.101652	0.102591	0.10295	0.10296	0.10296	0.10296	0.104167
YGR102C	0.145109	0.146869	0.14382	0.146206	0.149573	0.14888	0.145031	0.148551	0.143116	0.144758	0.144122	0.146912	0.144565	0.145632	0.146465	0.148551	0.150015	0.144649	0.145049	0.144827	0.144928	0.144928	0.145113
YGR104C	0.121212	0.124459	0.119949	0.124459	0.121533	0.121901	0.12344	0.121212	0.12013	0.124188	0.119874	0.122998	0.122128	0.123454	0.12222	0.119048	0.121419	0.120962	0.123881	0.123858	0.124459	0.123377	0.123515
YGR105W	0.0940171	0.094475	0.0940171	0.0942685	0.0940171	0.0940171	0.0942613	0.0940171	0.0897436	0.0944177	0.0940171	0.0942206	0.0934473	0.0942545	0.0940603	0.0940171	0.0940171	0.0933596	0.094049	0.0940171	0.0940171	0.0940171	0.0931405
YGR106C	0.109524	0.11126	0.108801	0.110349	0.113232	0.113352	0.111242	0.109023	0.113671	0.110002	0.109771	0.110335	0.109942	0.111668	0.111276	0.110276	0.112782	0.10989	0.110491	0.110554	0.109794	0.110276	0.110468
YGR108W	0.0995419	0.0997433	0.0999922	0.100775	0.100034	0.0993017	0.100876	0.10007	0.0994112	0.100225	0.0998454	0.100641	0.100023	0.100971	0.100035	0.10007	0.100085	0.100125	0.101017	0.100775	0.101317	0.100775	0.100811
YGR109C	0.102448	0.103553	0.102472	0.103497	0.102873	0.104342	0.102676	0.103093	0.104368	0.103361	0.101625	0.102438	0.102921	0.102902	0.102971	0.103093	0.102654	0.10382	0.103131	0.103141	0.103093	0.103093	0.103159
YGR111W	0.104834	0.104858	0.104115	0.104105	0.105747	0.105453	0.104286	0.105536	0.109714	0.104298	0.102595	0.104632	0.103775	0.103565	0.104579	0.10306	0.107638	0.105345	0.103975	0.103885	0.104647	0.103885	0.103885
YGR112W	0.116976	0.115814	0.115278	0.115833	0.115508	0.115483	0.116045	0.115785	0.114956	0.115215	0.114679	0.115903	0.115564	0.1156	0.115316	0.114956	0.116632	0.116423	0.115729	0.115739	0.116614	0.115785	0.115721
YGR113W	0.113817	0.115502	0.110661	0.113004	0.112864	0.113813	0.113073	0.114429	0.112491	0.110897	0.108777	0.11466	0.1143	0.112545	0.112971	0.11346	0.114409	0.112193	0.114675	0.115075	0.115622	0.114429	0.114429
YGR116W	0.0778942	0.076816	0.0764018	0.0747007	0.0765956	0.0768316	0.0775157	0.0766898	0.0787416	0.0776835	0.0759971	0.0779985	0.0775713	0.0774724	0.0770718	0.0764145	0.0771125	0.0767498	0.0777259	0.0777655	0.0776145	0.0775807	0.077738
YGR119C	0.0985366	0.0980741	0.0969013	0.0992543	0.0988202	0.0989754	0.0980613	0.0994659	0.0987767	0.0978359	0.0970262	0.0982668	0.0981469	0.0981336	0.0980835	0.0994659	0.0978204	0.0978057	0.0985487	0.0985	0.098728	0.0994659	0.0996042
YGR120C	0.104228	0.102052	0.101016	0.104709	0.100798	0.101237	0.104986	0.10067	0.104334	0.105	0.101329	0.104058	0.104748	0.103652	0.102549	0.101918	0.102104	0.100478	0.105053	0.105386	0.104703	0.104415	0.104447
YGR122W	0.132548	0.132193	0.130916	0.133314	0.135607	0.133995	0.132577	0.131514	0.135623	0.132806	0.130399	0.131789	0.132341	0.133627	0.132324	0.132341	0.134365	0.132786	0.132511	0.132479	0.132341	0.132341	0.132426
YGR123C	0.087752	0.0883172	0.0863073	0.0867926	0.0874353	0.0871949	0.0867654	0.0864874	0.0876589	0.0867104	0.0863163	0.0866727	0.0863145	0.087136	0.0867888	0.0858389	0.0875085	0.085789	0.086652	0.0865235	0.0864874	0.0864874	0.0878842
YGR124W	0.0653691	0.0672351	0.0653403	0.0664088	0.0656878	0.0662577	0.0655297	0.066782	0.0669308	0.0665117	0.0642509	0.0660131	0.0657055	0.0662053	0.0657318	0.0650519	0.0661317	0.0650075	0.0663064	0.0661092	0.0662053	0.0662053	0.0662497
YGR126W	0.0919454	0.0921413	0.0880814	0.0893735	0.0910167	0.0916962	0.0891213	0.0906467	0.0892037	0.0914584	0.0873398	0.089616	0.0889151	0.0884021	0.0893058	0.0906467	0.0907081	0.0906467	0.089239	0.0892037	0.0892037	0.0892037	0.0893147
YGR127W	0.0990398	0.100556	0.0970641	0.0982436	0.101149	0.100367	0.097546	0.0993052	0.100504	0.0984758	0.0971378	0.0999118	0.0973943	0.0977128	0.0985438	0.100367	0.103574	0.0986519	0.0981644	0.0984205	0.0982436	0.097182	0.0983525
YGR128C	0.119672	0.119163	0.117539	0.119812	0.11755	0.117138	0.118335	0.116628	0.120755	0.118568	0.115835	0.117958	0.118821	0.118071	0.117966	0.1167	0.117294	0.117023	0.11992	0.119837	0.119812	0.119812	0.120925
YGR132C	0.0925347	0.0925099	0.0916924	0.0914352	0.0925629	0.0929082	0.0914352	0.0925926	0.0949074	0.0919416	0.0916442	0.0916556	0.0915123	0.0916281	0.091973	0.0925926	0.093159	0.0925926	0.0914913	0.0916924	0.0914352	0.0914352	0.0914649
YGR134W	0.104472	0.10496	0.10391	0.104829	0.104281	0.104306	0.104508	0.104118	0.105487	0.106124	0.103471	0.104427	0.104354	0.104003	0.104383	0.104708	0.104381	0.104163	0.104757	0.10474	0.104912	0.104708	0.104534
YGR135W	0.0816602	0.0831495	0.0812956	0.0827466	0.0813781	0.0821341	0.0820739	0.0823681	0.0813717	0.0813626	0.080527	0.0820617	0.0821107	0.0814386	0.0816921	0.0823681	0.0811085	0.0823681	0.0824353	0.0824396	0.0823681	0.0836551	0.0836551
YGR136W	0.104285	0.104295	0.104989	0.106376	0.107626	0.106088	0.105741	0.104836	0.103459	0.106515	0.104875	0.105427	0.104561	0.105678	0.105337	0.104836	0.104836	0.104624	0.106162	0.106214	0.106214	0.106214	0.106602
YGR141W	0.0911843	0.0932956	0.0924307	0.0924936	0.0920563	0.0925278	0.092624	0.0913623	0.0900987	0.0920523	0.0910161	0.0920407	0.0923595	0.092035	0.0919307	0.0913623	0.0926505	0.0921294	0.0927098	0.0927868	0.0927868	0.0927868	0.0921111
YGR142W	0.166854	0.165199	0.163816	0.167407	0.164982	0.165676	0.162859	0.163181	0.164535	0.165477	0.162935	0.165295	0.165549	0.165334	0.164673	0.163989	0.164796	0.164113	0.166458	0.166544	0.16641	0.165603	0.166472
YGR144W	0.0664767	0.0656102	0.0703107	0.070887	0.0661853	0.0664443	0.0675033	0.0656102	0.0707855	0.0664616	0.0654687	0.069979	0.0702314	0.0694045	0.0675254	0.0686683	0.0656102	0.0693741	0.0716154	0.0714999	0.0707071	0.0707071	0.0717264
YGR145W	0.0840738	0.0859335	0.082834	0.083711	0.0829909	0.083559	0.0830178	0.0829909	0.0853754	0.0843298	0.0812908	0.0833272	0.083399	0.0830956	0.0829386	0.0839325	0.083021	0.083172	0.0837024	0.0835664	0.0838239	0.0839325	0.0834497
YGR147C	0.120567	0.122264	0.119779	0.121928	0.121228	0.121841	0.121218	0.12247	0.123624	0.121101	0.11861	0.121756	0.121009	0.119843	0.121212	0.121317	0.120483	0.121494	0.121786	0.122086	0.121317	0.123624	0.121258
YGR149W	0.0901323	0.0895494	0.0859526	0.0888055	0.0897355	0.0892995	0.0891535	0.0878998	0.0893898	0.0891026	0.085323	0.0884772	0.0886696	0.0867878	0.0886696	0.0878998	0.0896851	0.0864786	0.0889166	0.0890973	0.0890841	0.0894394	0.0890052
YGR152C	0.0774115	0.0816675	0.0756885	0.0766501	0.0821327	0.0800977	0.0781092	0.0825397	0.0769467	0.0790675	0.0771808	0.0791674	0.0765975	0.0782662	0.0788397	0.0825397	0.0815005	0.0762468	0.0766534	0.0764347	0.0763408	0.0764347	0.0764347
YGR154C	NaN	0.129561	0.127753	0.130075	0.127876	0.126135	0.127219	0.12656	0.128698	0.125947	0.126715	0.128916	0.12824	0.128427	0.127814	0.12656	0.127493	0.125841	0.129344	0.129516	0.129792	0.129361	0.128995
YGR155W	0.0944256	0.0966143	0.0938022	0.095018	0.0961324	0.0958005	0.094449	0.0954426	0.0948499	0.0934126	0.0940391	0.0954114	0.0944365	0.0951145	0.0950847	0.0941303	0.0962803	0.0931713	0.094522	0.0943855	0.0953921	0.0947864	0.0949715
YGR156W	0.071897	0.0730456	0.0717322	0.0719107	0.0710983	0.0707544	0.0710383	0.069477	0.0748659	0.0733247	0.0706046	0.0707037	0.071975	0.0719056	0.0709515	0.0710383	0.0708057	0.0704378	0.0723228	0.0724261	0.0721191	0.0725995	0.0723994
YGR157W	0.10228	0.101259	0.099702	0.102209	0.0981347	0.0993034	0.0995512	0.101149	0.101953	0.102778	0.0975309	0.099854	0.101481	0.100043	0.0995588	0.0988506	0.0990544	0.0983201	0.102001	0.10198	0.10221	0.101916	0.102623
YGR158C	0.105635	0.104413	0.103915	0.10557	0.10175	0.102862	0.104867	0.101684	0.10557	0.105489	0.10244	0.105076	0.106088	0.104491	0.103058	0.102979	0.102759	0.101883	0.106048	0.105642	0.10557	0.10557	0.10557
YGR161C	0.0884048	0.0905701	0.088279	0.088723	0.0878275	0.088279	0.0885306	0.0920526	0.0906324	0.0891045	0.0879121	0.0886983	0.0889499	0.0897465	0.0889016	0.088279	0.0881987	0.088279	0.0886592	0.0892574	0.088279	0.088279	0.0891498
YGR162W	0.0810937	0.0809656	0.0808474	0.0817377	0.0809154	0.0815259	0.0810671	0.0812798	0.0829282	0.0813115	0.0806171	0.0810381	0.0811444	0.0811294	0.0811362	0.0809414	0.080711	0.0804208	0.0813619	0.0815618	0.0810716	0.0809414	0.0815922
YGR163W	0.0923977	0.0906781	0.0896686	0.0917899	0.0889689	0.0887826	0.091423	0.0925926	0.0916179	0.0899732	0.0884097	0.0910146	0.091423	0.0904267	0.090279	0.088694	0.088694	0.0889189	0.0916943	0.0916179	0.0916179	0.0916179	0.0916679
YGR165W	0.089499	0.0896642	0.087401	0.0895387	0.0886567	0.0889823	0.089155	0.088632	0.0886631	0.0880901	0.0871735	0.0892284	0.08921	0.0890066	0.0890407	0.088632	0.088673	0.0876686	0.0895737	0.0895954	NaN	0.0895954	0.0895954
YGR166W	0.117463	0.117946	0.116285	0.119714	0.118161	0.117444	0.118968	0.116383	0.119189	0.117001	0.116002	0.118495	0.118951	0.117907	0.118099	0.118134	0.11909	0.11526	0.119726	0.119756	0.119661	0.119302	0.119361
YGR167W	0.0908579	0.0918324	0.0904204	0.0899562	0.0932634	0.0915356	0.0899538	0.0898734	0.0912799	0.0904887	0.0907525	0.0912799	0.090436	0.0915143	0.0914504	0.0912799	0.0939731	0.090198	0.0902723	0.0909673	0.0898734	0.0898734	0.0908832
YGR168C	0.130645	0.14044	0.134038	0.129009	0.139735	0.138172	0.129918	0.136966	0.131833	0.137802	0.132374	0.130104	0.128891	0.131907	0.133287	0.138735	0.139657	0.130029	0.129135	0.12896	0.129077	0.129893	0.129893
YGR169C	0.0920838	0.0926541	0.0928337	0.0932022	0.0956018	0.0933034	0.0936711	0.0931538	0.0964194	0.0928194	0.0933367	0.0936241	0.0932086	0.0941597	0.0935196	0.0931538	0.0955003	0.091571	0.0934424	0.0937025	0.0939768	0.0931538	0.0929849
YGR170W	0.0961689	0.0963821	0.0932441	0.0931408	0.0955588	0.0971346	0.094969	0.0962567	0.0985507	0.095461	0.0935903	0.0949328	0.09493	0.0952974	0.0953403	0.0965493	0.0950612	0.0942306	0.0951319	0.0952161	0.0947934	0.0950861	0.0951177
YGR171C	0.113125	0.112714	0.110281	0.113479	0.111876	0.112795	0.112354	0.112321	0.114263	0.112453	0.110323	0.112679	0.112012	0.111967	0.111609	0.114057	0.113774	0.111386	0.112934	0.113061	0.113122	0.1129	0.113048
YGR172C	0.0699295	0.0721979	0.0707476	0.07332	0.0715028	0.0714373	0.0709644	0.0698552	0.0698552	0.0706919	0.0704873	0.0713214	0.0710154	0.0703758	0.0705719	0.0698552	0.0713363	0.070782	0.0702798	0.0699295	0.0703701	0.0698552	0.0698552
YGR173W	0.0712778	0.071452	0.0707208	0.0718278	0.0708713	0.0712819	0.0714133	0.0717747	0.0728528	0.0708713	0.069968	0.0708713	0.0712929	0.0707208	0.0707983	0.069968	0.0699872	0.0703849	0.071142	0.0709215	0.0708713	0.0708713	0.0723537
YGR175C	0.0589537	0.0571956	0.0571503	0.0596402	0.0570758	0.0561612	0.059222	0.0577465	0.0584172	0.0575998	0.0571224	0.0586727	0.0597138	0.0584544	0.0581259	0.0564051	0.0571757	0.0563535	0.0598637	0.0597958	0.0597586	0.0597586	0.060412
YGR178C	0.0877824	0.0892742	0.0880027	0.0881594	0.0893346	0.0894882	0.0874201	0.0894882	0.0899344	0.0880187	0.087548	0.088654	0.0875519	0.089437	0.0887637	0.0890272	0.0892528	0.0865447	0.0883718	0.0882844	0.0884598	0.0885662	0.0887789
YGR179C	0.136393	0.140899	0.139225	0.137194	0.141553	0.142032	0.136987	0.141365	0.141128	0.138054	0.136871	0.140123	0.136529	0.138331	0.139644	0.142995	0.141746	0.137102	0.136812	0.136882	0.136475	0.136475	0.136475
YGR180C	0.0530172	0.0539874	0.0528941	0.0541251	0.0521983	0.0534244	0.0534094	0.0521983	0.0534103	0.0534326	0.0530279	0.0523818	0.0534828	0.0535363	0.0527822	0.0521983	0.0521983	0.0529394	0.0540747	0.0543927	0.0541251	0.0550885	0.0549649
YGR181W	0.0819182	0.0882749	0.080014	0.081761	0.0850669	0.0871927	0.0808625	0.0849057	0.0901806	0.081761	0.0804944	0.0838574	0.0811321	0.0828092	0.0836669	0.0880503	0.0934029	0.0822448	0.0811978	0.0814116	0.081761	0.081761	0.087889
YGR184C	0.0925539	0.0932311	0.0912489	0.0937144	0.0931828	0.0935948	0.0926611	0.0939052	0.094401	0.0916567	0.0919225	0.0929294	0.0927782	0.0934783	0.0924898	0.0932222	0.0941317	0.090361	0.0932394	0.093355	0.0930908	0.0932222	0.09433
YGR185C	0.0793824	0.0781467	0.0795465	0.0800153	0.079258	0.0794783	0.0796296	0.0817031	0.0774837	0.080701	0.079441	0.0803368	0.0800716	0.0794996	0.0794528	0.0783276	0.0810926	0.0791715	0.0803082	0.0801091	0.0809891	0.0800153	0.0805347
YGR186W	0.0948712	0.0919841	0.0920142	0.0923389	0.0920808	0.0922865	0.0920064	0.0918409	0.0931634	0.0934796	0.0923636	0.0926685	0.0936234	0.0927074	0.092399	0.0927321	0.0922675	0.0921494	0.0938379	0.0943909	0.0931092	0.0922865	0.0923322
YGR187C	0.102137	0.101794	0.101211	0.101715	0.1017	0.101312	0.100414	0.101764	0.10369	0.101738	0.101303	0.102475	0.101985	0.102547	0.101605	0.100106	0.101799	0.102083	0.101987	0.101441	0.102593	0.100106	0.102614
YGR188C	0.10849	0.108635	0.107887	0.108506	0.10781	0.108338	0.107646	0.108279	0.109699	0.107908	0.107793	0.108172	0.108151	0.108279	0.108179	0.107637	0.108156	0.107736	0.108448	0.108493	0.108181	0.107637	0.10837
YGR191W	0.0796993	0.0816361	0.0781657	0.0806813	0.0831993	0.0812269	0.0794153	0.0812269	0.0824236	0.0801699	0.0784309	0.0799799	0.0795902	0.080742	0.080235	0.0817724	0.083502	0.0792125	0.0799576	0.0797451	0.0795902	0.0801358	0.0805834
YGR195W	0.0640167	0.0655879	0.066086	0.0642866	0.0652455	0.0657588	0.0644023	0.0656361	0.0669856	0.0652566	0.0647552	0.0645436	0.0643766	0.0654112	0.0649273	0.0642866	0.0656361	0.0641828	0.0645132	0.0642866	0.0642866	0.0642866	0.064425
YGR196C	0.137295	0.136356	0.135049	0.137921	0.13651	0.136777	0.136209	0.136921	0.138809	0.135957	0.136416	0.137356	0.136789	0.136416	0.136334	0.136921	0.137611	0.136373	0.13744	0.137492	0.13759	0.137712	0.137681
YGR197C	0.116612	0.117807	0.115585	0.116114	0.117858	0.117819	0.1161	0.117155	0.119608	0.115906	0.116227	0.116618	0.11631	0.116384	0.116505	0.116584	0.118148	0.115748	0.116737	0.116625	0.116863	0.117095	0.116553
YGR198W	0.106532	0.10779	0.107022	0.10783	0.107825	0.108135	0.106972	0.105912	0.108883	0.106778	0.106676	0.108008	0.106972	0.107429	0.10697	0.106727	0.107629	0.10701	0.107935	0.107859	0.108138	0.10795	0.107469
YGR199W	0.100969	0.101381	0.10031	0.101247	0.10264	0.101509	0.100146	0.101706	0.101888	0.101286	0.101383	0.101789	0.101244	0.100936	0.100751	0.10214	0.102518	0.0999391	0.101662	0.101754	0.101706	0.101706	0.101695
YGR201C	0.112745	0.117812	0.110835	0.112228	0.118166	0.117056	0.114799	0.119603	NaN	0.111998	0.11102	0.113142	0.112032	0.114523	0.114125	0.119603	0.118505	0.114044	0.112516	0.112884	0.112796	0.112228	0.112228
YGR202C	0.085808	0.0881726	0.085268	0.0863127	0.0893339	0.088148	0.0874242	0.0872506	0.0900919	0.0860168	0.0847829	0.0858405	0.0853777	0.0859851	0.0861845	0.0887692	0.0884138	0.0864329	0.0851257	0.0853102	0.0849727	0.085732	0.0849727
YGR203W	0.113118	0.112772	0.110038	0.114154	0.111826	0.112874	0.111334	0.113891	0.111653	0.112632	0.110473	0.112186	0.111653	0.112648	0.111608	0.113891	0.112748	0.109072	0.11227	0.112399	0.112686	0.111653	0.111653
YGR204W	0.0859381	0.0849701	0.0839923	0.0871441	0.0847385	0.0842981	0.0848896	0.0839141	0.0864802	0.086444	0.0832004	0.0861434	0.0859556	0.0852047	0.0847568	0.0856741	0.0847229	0.0859448	0.0867505	0.0864954	0.0865134	0.087786	0.0866939
YGR205W	0.109945	0.11271	0.107183	0.108973	0.110203	0.111319	0.106672	0.109028	0.109287	0.109315	0.106817	0.108047	0.107043	0.108392	0.108427	0.110174	0.110296	0.109557	0.108054	0.108074	0.107883	0.107883	0.108089
YGR206W	0.10719	0.101891	0.0987654	0.107843	0.10181	0.101901	0.102428	0.101307	0.104575	0.107945	0.0980392	0.10582	0.106972	0.103849	0.101703	0.101307	0.101307	0.106335	0.108136	0.107843	0.107843	0.107843	0.108095
YGR207C	0.0791349	0.0826063	0.0774668	0.0791049	0.0788478	0.0801527	0.0785533	0.0814249	0.078511	0.0796756	0.076707	0.0791833	0.07905	0.0796226	0.0793357	0.0801527	0.0788804	0.0788804	0.0789089	0.0790925	0.0788804	0.0788804	0.0788804
YGR208W	0.1165	0.121362	0.116775	0.118107	0.116826	0.118475	0.117207	0.119941	0.120878	0.11722	0.11579	0.117944	0.117791	0.117134	0.117932	0.117791	0.117059	0.11746	0.118072	0.118149	0.117791	0.117791	0.117818
YGR209C	0.0571429	0.0588435	0.0536155	0.0571429	0.0554335	0.0559885	0.0556009	0.0603175	0.0620584	0.058631	0.0543651	0.056387	0.0562963	0.0560847	0.0566939	0.0603175	0.0571429	0.0578755	0.0578773	0.0574956	0.0571429	0.0603175	0.0596663
YGR210C	0.0722014	0.0727446	0.0704113	0.0723656	0.0697358	0.0701677	0.0712016	0.07208	0.071271	0.0715491	0.0700461	0.0725038	0.072134	0.0713159	0.0708051	0.0688438	0.0696701	0.0719556	0.0726506	0.0728441	0.0725157	0.07208	0.0723497
YGR211W	0.0875583	0.0867956	0.0854023	0.0877576	0.0872889	0.0859934	0.086253	0.086429	0.0877979	0.0861723	0.0848604	0.0874394	0.0868853	0.0866191	0.0863806	0.0857445	0.0872736	0.087482	0.0879511	0.0880641	0.0877979	0.0877979	0.0883069
YGR212W	0.143597	0.146323	0.142132	0.143159	0.144325	0.145571	0.143308	0.144343	0.144733	0.143191	0.14079	0.143362	0.143443	0.143751	0.143393	0.144343	0.145084	0.143578	0.143606	0.143672	0.14325	0.143632	0.142393
YGR213C	0.121521	0.123483	0.123269	0.122636	0.125252	NaN	0.123171	0.12356	0.123526	0.121924	0.120884	0.12351	0.121885	0.123269	0.123021	0.121466	0.124229	0.122433	0.122572	0.122513	0.122513	0.12356	0.121501
YGR215W	0.0898717	0.0886276	0.0862681	0.0871513	0.0862681	0.0862681	0.0862681	0.0862681	0.0874305	0.0862681	0.0862681	0.0864111	0.0872691	0.0862681	0.0866624	0.0862681	0.0862681	0.0885781	0.0863131	0.0862681	0.0862681	0.0862681	0.0862681
YGR216C	0.10832	0.107801	0.107287	0.107923	0.108985	0.108352	0.107813	0.107317	0.110237	0.107571	0.107468	0.108453	0.108329	0.107678	0.107761	0.108943	0.108655	0.10715	0.108312	0.107769	0.108443	0.108943	0.107984
YGR217W	0.0961435	0.0962525	0.0950963	0.0960382	0.0969633	0.0963027	0.0957145	0.095933	0.0965756	0.0957042	0.0948755	0.0953752	0.0959547	0.0959059	0.0955632	0.0957703	0.0968641	0.096446	0.0961208	0.0959872	0.0964711	0.0962583	0.0968298
YGR218W	0.0737704	0.0743541	0.0736474	0.0739742	0.0746358	0.0745706	0.0734925	0.0741237	0.0746697	0.0734098	0.0736835	0.073887	0.0737364	0.0739903	0.0739813	0.0745706	0.0743002	0.0734405	0.0738965	0.0737001	0.074547	0.0742634	0.07435
YGR221C	0.150597	0.152088	0.149561	0.150989	0.152995	0.152509	0.149838	0.151847	0.150704	0.150805	0.149525	0.150755	0.150319	0.150836	0.1509	0.150805	0.152445	0.150484	0.150827	0.151355	0.150524	0.150805	0.151059
YGR222W	0.135906	0.139741	0.136465	0.135347	0.138961	0.138702	0.135754	0.138702	0.140723	0.14052	0.135331	0.135879	0.135198	0.136217	0.137652	0.138702	0.138869	0.136379	0.135484	0.135347	0.135347	0.136465	0.135347
YGR223C	0.12136	0.12079	0.121089	0.12056	0.121095	0.121347	0.120853	0.119734	0.120044	0.119734	0.120709	0.120931	0.120276	0.120884	0.120301	0.120473	0.121479	0.120416	0.120603	0.120473	0.120473	0.121212	0.120606
YGR227W	0.0777273	0.07671	0.0775758	0.0785383	0.0775136	0.076584	0.0778701	0.0781818	0.0799413	0.0772538	0.0767508	0.0778066	0.0776162	0.0775084	0.076835	0.0769697	0.0763636	0.0780886	0.0781705	0.0781818	0.0781818	0.0781818	0.0783838
YGR229C	0.11492	0.118494	0.115127	0.116628	0.115981	0.116455	0.115829	0.119509	0.114909	0.115813	0.114836	0.115703	0.116154	0.117421	0.116611	0.11716	0.116595	0.116604	0.116323	0.116383	0.115818	0.116514	0.115851
YGR230W	0.178832	0.185112	0.179744	0.18156	0.18121	NaN	0.181937	0.185112	0.185579	0.18153	0.178235	0.180626	0.180838	0.183099	0.181771	0.180281	0.182645	0.18121	0.179939	0.179878	0.180281	0.180281	0.179476
YGR231C	0.0867808	0.0867959	0.0859545	0.087423	0.087983	0.0862102	0.0876925	0.0863061	0.0867144	0.0866357	0.0863647	0.0873107	0.0870797	0.087654	0.08702	0.0884158	0.0878547	0.087361	0.0873055	0.087361	0.086793	0.087361	0.087388
YGR232W	0.0771739	0.076087	0.0758454	0.0768968	0.0752508	0.0747036	0.0763561	0.073913	0.0765311	0.0765851	0.0758454	0.0766736	0.0765217	0.076087	0.0751135	0.0753623	0.0738822	0.0765886	0.0770766	0.0768921	0.0768116	0.0768116	0.0768116
YGR234W	0.102311	0.101418	0.10282	0.103463	0.103368	0.102197	0.103703	0.103561	0.106975	0.102857	0.102646	0.1036	0.103394	0.102588	0.102424	0.103561	0.103614	0.103497	0.103346	0.103514	0.104266	0.102727	0.103368
YGR235C	0.126496	0.12037	0.123299	0.12544	0.123092	0.123025	0.125105	0.122507	0.125494	0.125623	0.124367	0.125763	0.124976	0.12409	0.123037	0.122617	0.122537	0.126342	0.125431	0.125356	0.125356	0.125356	0.125356
YGR236C	0.105903	0.107143	0.103202	0.104575	0.104523	0.104798	0.104762	0.104167	0.111223	0.103841	0.102382	0.104332	0.104167	0.10436	0.104202	0.104167	0.106974	0.104701	0.105061	0.104167	0.104167	0.104167	0.104167
YGR237C	0.0961842	0.0956094	0.0951018	0.0946893	0.0951416	0.0953371	0.094611	0.0944053	0.0968127	0.0949003	0.09389	0.0948934	0.0945182	0.0947018	0.0941606	0.09449	0.0953011	0.0945226	0.0946149	0.09449	0.0949787	0.09449	0.0948158
YGR239C	0.135462	0.133147	0.137564	0.138902	0.136435	0.137569	0.135281	0.137884	0.13993	0.13792	0.135289	0.136731	0.136346	0.136602	0.135742	0.13327	0.136829	0.136819	0.136877	0.136795	0.136731	0.136731	0.136908
YGR240C	0.0622132	0.0609095	0.0621345	0.0622668	0.0633076	0.0629831	0.0614469	0.0629555	0.063085	0.0624262	0.0607381	0.0618775	0.0619771	0.0619846	0.0620152	0.0615722	0.0637329	0.0617798	0.0617371	0.0616472	0.0619096	0.0619096	0.0618577
YGR241C	0.105768	0.103801	0.1063	0.106339	0.106485	0.105307	0.105673	0.104464	0.106708	0.106239	0.105752	0.106645	0.106744	0.10601	0.104827	0.103884	0.105179	0.107674	0.107079	0.106783	0.106203	0.107411	0.106961
YGR243W	0.129932	0.131438	0.130637	0.130719	0.131519	0.12987	0.12964	0.129252	0.126106	0.127055	0.130637	0.129468	0.129705	0.130511	0.129275	0.131519	0.130603	0.129252	0.129302	0.129252	0.129252	0.129252	0.131984
YGR244C	0.077301	0.0783747	0.0776299	0.0769987	0.0772971	0.0772444	0.0771675	0.0774568	0.0785622	0.0775564	0.0775325	0.0769005	0.0769895	0.0775001	0.0770084	0.0774568	0.078799	0.0774568	0.0770616	0.0767645	0.0774568	0.076678	0.0775367
YGR246C	0.108489	0.108282	0.109164	0.108573	0.109165	0.109436	0.107903	0.108573	0.108537	0.108852	0.108294	0.108467	0.108387	0.108635	0.107805	0.109085	0.108739	0.108144	0.108592	0.108821	0.108058	0.108061	0.108888
YGR247W	0.0835417	0.0828869	0.0818673	0.0860294	0.0836182	0.0828283	0.0818651	0.0819444	0.084543	0.084158	0.0812693	0.0832672	0.0834259	0.0834877	0.0822811	0.0819444	0.0826241	0.0832265	0.0834888	0.0833333	0.0833333	0.0833333	0.0834402
YGR248W	0.124154	0.127372	0.126591	0.126302	0.128539	0.125829	0.124777	0.126302	0.12899	0.125895	0.125922	0.126488	0.125521	0.126085	0.12593	0.127604	0.125693	0.126402	0.125748	0.12594	0.125901	0.125	0.127671
YGR249W	0.102405	0.0997933	0.100933	0.101357	0.101174	0.100006	0.0995854	0.0979534	0.102575	0.10146	0.0971497	0.10118	0.101059	0.100345	0.0981783	0.0979534	0.100461	0.100993	0.101095	0.101482	0.100776	0.101482	0.100719
YGR250C	0.0993773	0.0968066	0.0989761	0.0990086	0.0989441	0.0989509	0.0976161	0.0975924	0.0991992	0.0984874	0.097748	0.09864	0.0992528	0.0986532	0.0978523	0.0971773	0.099695	0.0987738	0.0987832	0.0991375	0.099074	0.0988377	0.0985397
YGR251W	0.109119	0.111441	0.110009	0.110291	0.110161	0.111829	0.110097	0.110291	0.11362	0.108599	0.109233	0.109445	0.110291	0.110479	0.109773	0.110291	0.110291	0.110551	0.110076	0.110291	0.110291	0.110291	0.110334
YGR252W	0.0737879	0.0715245	0.0728956	0.0727273	0.0727078	0.0718758	0.0725325	0.0713499	0.073607	0.0727036	0.0724747	0.0729831	0.0729798	0.0735269	0.0721735	0.0727273	0.072276	0.0729604	0.072781	0.0727273	0.0729604	0.0727273	0.072805
YGR253C	0.0760072	0.0768191	0.0754609	0.0759659	0.07706	0.0763961	0.076436	0.0770928	0.077134	0.0748977	0.0754431	0.076363	0.0759859	0.0763832	0.0758801	0.0758156	0.0770928	0.0772893	0.0759919	0.0759575	0.0766998	0.0758156	0.0758156
YGR256W	0.0874267	0.0886748	0.0866426	0.0880592	0.0905974	0.0877322	0.0869851	0.0901149	0.0863427	0.0869017	0.0862413	0.0874587	0.0872027	0.0877254	0.0874063	0.0880987	0.0896859	0.0877369	0.0874167	0.0875387	0.0885123	0.0880987	0.0876507
YGR257C	0.0840448	0.0840145	0.082198	0.0834535	0.0871702	0.0849641	0.0846503	0.0862852	0.0830623	0.084497	0.0840914	0.0841974	0.0839237	0.0842668	0.0841467	0.0826521	0.0881211	0.0844687	0.0844788	0.0848219	0.0838399	0.0835604	0.0852838
YGR258C	0.121139	0.122134	0.120748	0.121714	0.122161	0.121882	0.121098	0.120659	0.122332	0.121205	0.120721	0.121179	0.12147	0.121679	0.120673	0.123454	0.120019	0.121447	0.121671	0.121691	0.121373	0.12162	0.121841
YGR261C	0.0946497	0.0936112	0.0929187	0.09513	0.0960093	0.0946797	0.0940853	0.0946294	0.0953745	0.0942622	0.0931944	0.0952469	0.0946565	0.0951697	0.0940419	0.0953123	0.0956812	0.0953463	0.0951601	0.0951022	0.09491	0.0950346	0.0951697
YGR262C	0.085687	0.0872864	0.0864433	0.0853914	0.0866771	0.0866297	0.0856052	0.0852417	0.0861857	0.0859971	0.0857012	0.0853629	0.0852417	0.0855951	0.0854345	0.0852417	0.086514	0.0852417	0.0852655	0.0852417	0.0852417	0.0852417	0.0851439
YGR263C	0.116813	0.117026	0.113179	0.11727	0.116497	0.117861	0.116465	0.115009	0.117438	0.115328	0.114867	0.1171	0.116734	0.116403	0.116397	0.116578	0.116978	0.117	0.117084	0.117013	0.11694	0.117362	0.114989
YGR267C	0.069194	0.0688427	0.0686096	0.0696721	0.0687264	0.0681818	0.0692818	0.068306	0.0684823	0.0696721	0.0688752	0.0696721	0.0693989	0.069748	0.0684026	0.0696721	0.0684223	0.0708281	0.0697129	0.0696721	0.0696721	0.0696721	0.0696721
YGR270W	0.122371	0.123969	0.121294	0.123121	0.123171	0.122492	0.122469	0.122079	0.123253	0.121966	0.121653	0.122443	0.122414	0.122597	0.122186	0.122079	0.124004	0.123368	0.122893	0.123023	0.122889	0.122797	0.123092
YGR282C	0.0547674	0.0563219	0.0572444	0.0552982	0.056387	0.0532716	0.0561916	0.0561668	0.0545448	0.0548669	0.0553424	0.0558543	0.0560059	0.0561239	0.0551939	0.0542366	0.0563824	0.0561816	0.0561578	0.0563008	0.0559515	0.0574213	0.0559787
YGR283C	0.141145	0.138629	0.140347	0.140782	0.14162	0.1407	0.140695	0.141571	0.139532	0.140463	0.141079	0.140476	0.141379	0.141464	0.140787	0.142529	0.141571	0.143413	0.142386	0.142529	0.14216	0.140613	0.140638
YGR284C	0.0615366	0.063129	0.0613639	0.0617352	0.0618403	0.0629446	0.0623711	0.061483	0.0636612	0.0613155	0.0611853	0.0619934	0.0625548	0.0624953	0.0615263	0.0604112	0.0623724	0.0615654	0.0624748	0.0622571	0.0621426	0.0625548	0.0617303
YGR285C	0.0712086	0.0703912	0.0717505	0.0727922	0.0709398	0.0718475	0.071642	0.0724759	0.0615047	0.0710358	0.0722839	0.0714153	0.0718615	0.0709398	0.0714984	0.0717079	0.0702698	0.0709989	0.0718712	0.0717079	0.0720033	0.0717079	0.0722002
YHL006C	0.100191	0.098535	0.0995738	0.100743	0.0987048	0.101746	0.100679	0.098535	0.101099	0.0999147	0.0997001	0.100637	0.101331	0.100743	0.100427	0.10295	0.100649	0.0987048	0.10094	0.10062	0.100743	0.100743	0.102441
YHL007C	0.0929453	0.0932023	0.091797	0.0941716	0.093024	0.0935001	0.094704	0.0923457	0.0931649	0.0935472	0.0911993	0.0936894	0.0943445	0.0937958	0.0925808	0.0926984	0.092886	0.0909619	0.0944555	0.0941093	0.0950861	0.0944621	0.0941184
YHL009C	0.152721	0.154706	0.151917	0.155488	0.153789	0.154119	0.152702	0.154741	0.153827	0.154588	0.154442	0.153484	0.154089	0.154687	0.153428	0.152786	0.153535	0.153839	0.154624	0.155012	0.154741	0.154741	0.154992
YHL010C	0.100834	0.10121	0.100603	0.103409	0.101742	0.102098	0.101684	0.100603	0.105926	0.102933	0.100877	0.102692	0.102248	0.102705	0.101406	0.100603	0.101805	0.100983	0.102484	0.102583	0.102923	0.102796	0.102726
YHL011C	0.0703531	0.0699451	0.0706925	0.0722008	0.071731	0.0729727	0.070939	0.0706127	0.066861	0.0715862	0.0710886	0.0715522	0.0717895	0.0717088	0.071263	0.0706127	0.0726674	0.0704529	0.071593	0.0716511	0.0716511	0.0716511	0.0715446
YHL012W	NaN	0.134511	0.132353	0.135608	0.137018	0.137037	0.133761	0.133549	0.137901	0.134117	0.133429	0.135462	0.13512	0.135531	0.135072	0.136241	0.135182	NaN	0.135325	0.135269	0.134999	0.135568	0.135171
YHL013C	0.114026	0.11366	0.111106	0.114183	0.113138	0.113803	0.111675	0.113138	0.108621	0.113072	0.111309	0.112789	0.113416	0.113834	0.112378	0.113138	0.113138	0.112253	0.114093	0.11395	0.114183	0.114183	0.114183
YHL014C	0.0951709	0.0933588	0.0940397	0.096586	0.0951309	0.0951635	0.0945024	0.0942678	0.0949034	0.0954737	0.0946099	0.0961444	0.0964024	0.0965484	0.09484	0.0975519	0.0958225	0.0945204	0.0967186	0.0967309	0.0967309	0.0967309	0.0967309
YHL015W	0.0134409	0.0134409	0.0119474	0.0134409	0.0126827	0.0136852	0.0104455	0.0134409	0.0114464	0.0147849	0.0118354	0.0131848	0.0129032	0.0129928	0.0121647	0.0134409	0.0133265	0.0122002	0.0133606	0.0135902	0.0134409	0.0134409	0.0134409
YHL016C	0.0840497	0.0843758	0.0807738	0.0847744	0.083857	0.0846097	0.0831226	0.0841568	0.0858993	0.083812	0.0818746	0.0844509	0.084645	0.0838686	0.0830262	0.0838686	0.084254	0.0806634	0.0847642	0.0851207	0.0847744	0.0847744	0.0848324
YHL017W	0.0903064	0.0928259	0.0897436	0.0916382	0.0910505	0.0924441	0.0902707	0.0894309	0.0915088	NaN	0.0898391	0.0910093	0.0896811	0.0908901	0.090031	0.0906817	0.0916264	0.089912	0.0906723	0.0902995	0.0911146	0.0913071	0.0915957
YHL018W	0.0964187	0.0989768	0.0965718	0.0970669	0.0974076	0.0966692	0.0964187	0.0991736	0.0968631	0.0975379	0.0958831	0.0969435	0.0966024	0.0965718	0.0968918	0.101928	0.0964187	0.0964187	0.0965038	0.0964187	0.0964187	0.0964187	0.09656
YHL019C	0.0916447	0.0960315	0.0914423	0.092663	0.0944631	0.0948066	0.0910706	0.0937348	0.0940632	0.0922275	0.0914795	0.0929947	0.0919127	0.092395	0.0928091	0.0942707	0.0941681	0.091756	0.0917731	0.0916507	0.0919209	0.0921271	0.0920584
YHL021C	0.0867327	0.0887423	0.086631	0.0872564	0.0873628	0.0877363	0.0872109	0.0885133	0.0880538	0.087623	0.0865645	0.0873025	0.0874687	0.0872075	0.0875421	0.0870888	0.0878617	0.0874724	0.0878808	0.0880385	0.0879655	0.0885133	0.0878011
YHL023C	0.105565	0.106273	0.104105	0.106368	0.107032	0.105761	0.105253	0.105761	0.104559	0.105295	0.10477	0.105897	0.105513	0.105506	0.105405	0.104615	0.107188	0.104041	0.106281	0.106143	0.106224	0.106334	0.106099
YHL025W	0.103295	0.104975	0.101265	0.104187	0.103689	0.101422	0.102851	0.102129	0.100311	0.102251	0.101954	0.10287	0.103554	0.103209	0.102482	0.101157	0.105127	0.106016	0.103859	0.103844	0.104073	0.104073	0.102628
YHL026C	0.089557	0.0876281	0.0867909	0.0888558	0.087688	0.0886076	0.0876733	0.0886076	0.0886076	0.0899262	0.0882706	0.0907173	0.0895218	0.089135	0.0882773	0.0864979	0.0878221	0.0887699	0.0900401	0.0910103	0.0887699	0.0907173	0.0882019
YHL029C	0.0970691	0.0969153	0.0953002	0.0911073	0.0958698	0.0965954	0.094986	0.0963725	0.10012	0.0969853	0.0950245	0.0970495	0.0964706	0.0961275	0.0956199	0.0939216	0.0958406	0.0966742	0.0968902	0.0967266	0.0967496	0.0968627	0.0973404
YHL030W	0.110543	0.111619	0.109164	0.111592	0.108359	0.110345	0.110618	0.111189	0.111179	0.110021	0.107934	0.110876	0.110808	0.110327	0.109785	0.112116	0.110196	0.110882	0.11124	0.111561	0.111156	0.112116	0.111622
YHL035C	NaN	0.141806	0.139485	0.14178	0.141006	0.141537	0.140916	0.14037	0.142434	0.141566	0.13936	0.141782	0.141717	0.140972	0.140949	0.140162	0.141802	0.141204	0.141299	0.14169	0.140979	NaN	0.141308
YHL038C	0.143039	0.143662	0.139803	0.143303	0.142111	0.143303	0.142322	0.144888	0.143797	0.142015	0.140229	0.142926	0.143338	0.142599	0.142343	0.143831	0.141572	0.143709	0.143482	0.143743	0.143303	0.143303	0.143303
YHL039W	0.132221	0.132295	0.129903	0.134581	0.131527	0.132532	0.132908	0.132072	0.132255	0.131912	0.132309	0.132635	0.133209	0.133396	0.132264	0.133209	0.131128	0.13194	0.134365	0.134062	0.134347	0.134347	0.13487
YHR004C	0.103193	0.105191	0.102664	0.102702	0.105188	0.104911	0.104107	0.105722	0.106226	0.103154	0.103294	0.103738	0.103391	0.104276	0.104129	0.104234	0.105295	0.103719	0.102791	0.10287	0.10349	0.10349	0.102288
YHR005C	0.0757223	0.0775194	0.0745047	0.0758198	0.0769773	0.0778397	0.0761099	0.0782241	0.0776558	0.0759558	0.0753661	0.0762106	0.0754052	0.0760708	0.0763804	0.0761099	0.0773095	0.0759473	0.0754026	0.0751703	0.0754052	0.0754052	0.0752426
YHR006W	0.113262	0.112967	0.111457	0.113444	0.113156	0.113664	0.113218	0.11405	0.115027	0.113387	0.112248	0.113992	0.113484	0.114151	0.113437	0.11405	0.11236	0.111113	0.114439	0.114184	0.114656	0.114656	0.114578
YHR007C	0.0523112	0.0500424	0.0513103	0.051257	0.0514123	0.0509616	0.0511768	0.0503338	0.0531283	0.0521779	0.0512667	0.0519182	0.0515056	0.0514498	0.0511772	0.0515893	0.0514291	0.0496095	0.0521792	0.0523566	0.0515893	0.0522171	0.052201
YHR008C	0.0797721	0.0789581	0.0772396	0.0799397	0.078932	0.0779591	0.0796093	0.0811966	0.0804614	0.0793714	0.0784663	0.0797042	0.079962	0.0799304	0.079585	0.0769231	0.0783779	0.0769231	0.0798199	0.0797721	0.0797721	0.0797721	0.0799182
YHR009C	0.0811294	0.0803695	0.0775953	0.0802853	0.0798353	0.0812514	0.0803377	0.0828823	0.0804567	0.0801111	0.0791856	0.080574	0.0805922	0.079327	0.0803728	0.0814828	0.0802782	0.0780574	0.0808632	0.0806346	0.0808466	0.0808466	0.0808466
YHR011W	0.0953437	0.0990128	0.0941529	0.0949089	0.0987863	0.0976954	0.0962306	0.0990392	0.0975133	0.0950828	0.0947483	0.0967515	0.0950973	0.0957132	0.0968069	0.0983001	0.0991021	0.0957985	0.0953409	0.0953026	0.0953437	0.0953437	0.0958175
YHR013C	0.075523	0.0741682	0.0732218	0.0762163	0.0740622	0.0754406	0.0745965	0.0739191	0.0739191	0.0751395	0.0739191	0.0749817	0.0753138	0.0751588	0.0743558	0.0739191	0.0753138	0.0743482	0.0753138	0.0753913	0.0753138	0.0753138	0.075135
YHR014W	0.136073	0.132502	0.133815	0.137188	0.133064	0.132316	0.137019	0.133562	0.137686	0.136915	0.135004	0.136497	0.136606	0.136289	0.134167	0.13242	0.13361	0.133562	0.137063	0.137177	0.136986	0.136986	0.137133
YHR015W	0.116616	0.115996	0.114815	0.115603	0.115817	0.117107	0.116378	0.11596	0.117312	0.115921	0.11509	0.115527	0.115522	0.1161	0.115862	0.116465	0.115745	0.114755	0.115613	0.115847	0.116387	0.115455	0.116089
YHR017W	0.120588	0.124092	0.118548	0.120164	0.122327	0.123096	0.119718	0.123567	0.120141	0.121462	0.118374	0.120935	0.120343	0.120977	0.120706	0.123567	0.123126	0.118784	0.120119	0.120017	0.120113	0.120113	0.120179
YHR018C	0.0803487	0.0805951	0.0781776	0.0801755	0.0789175	0.0791536	0.0793327	0.0794148	0.0788355	0.0802455	0.0787064	0.0805779	0.0805164	0.0794547	0.079277	0.0786964	0.0786964	0.0784754	0.0803986	0.0805323	0.0808516	0.0801332	0.0806858
YHR019C	0.0639148	0.0656176	0.0639397	0.0642675	0.0674535	0.0672673	0.0641332	0.0655747	0.0662721	0.0633036	0.0637312	0.0658035	0.0634125	0.0646738	0.0654715	0.0661753	0.0680026	0.0632647	0.0636025	0.0636394	0.0641887	0.0631723	0.0637421
YHR020W	0.0709552	0.0710865	0.0690768	0.0701769	0.0707774	0.0709762	0.0695813	0.0713602	0.0709908	0.0701683	0.0688162	0.069855	0.070144	0.069592	0.0696573	0.0699234	0.0713602	0.0682287	0.0701844	0.0701773	0.0705865	0.0697057	0.0699234
YHR023W	0.114254	0.114887	0.111537	0.114616	0.115116	0.114127	0.11442	0.114176	0.114331	0.114361	0.111732	0.114356	0.114285	0.114264	0.113787	0.114331	0.11507	0.111686	0.114322	0.114216	0.114145	0.114331	0.114535
YHR024C	0.0911695	0.0891927	0.0891489	0.0918576	0.0896575	0.0900821	0.0906026	0.0900307	0.0893629	0.0894916	0.0893598	0.0903265	0.0907669	0.0904908	0.0895009	0.0886505	0.0897518	0.0878011	0.0908316	0.0909509	0.0911456	0.0907209	0.0910394
YHR026W	0.0328802	0.0342376	0.0333475	0.0336682	0.0341662	0.0335599	0.0326132	0.0341263	0.0372416	0.0335422	0.0333691	0.032717	0.032984	0.0330879	0.0333868	0.0356839	0.0341263	0.0326885	0.0329406	0.0325687	0.0331678	0.0325687	0.0325687
YHR027C	0.0784982	0.0789653	0.0770282	0.078931	0.0788776	0.0786847	0.0790201	0.0811508	0.0783276	0.0781937	0.0779087	0.0788581	0.0787596	0.0785112	0.07856	0.0793824	0.0787577	0.0779194	0.0790973	0.0788263	0.0790744	0.0793824	0.0795535
YHR029C	0.134674	0.137281	0.133425	0.135249	0.1377	0.13549	0.136393	0.135182	0.135109	0.135041	0.134994	0.134752	0.135484	0.134429	0.135019	0.139702	0.138469	0.132401	0.135465	0.13581	0.135617	0.135182	0.135414
YHR031C	0.0977126	0.0987091	0.0962317	0.0987729	0.0983625	0.0981082	0.0978475	0.100452	0.100452	0.0978766	0.0964491	0.0978869	0.0980886	0.0983546	0.0977413	0.0972292	0.0988161	0.0970167	0.0982651	0.0980477	0.09815	0.0986104	0.0983507
YHR035W	0.151381	0.153398	0.149232	0.152792	0.153096	0.152519	0.152508	0.154957	0.154129	0.150093	0.14902	0.151977	0.152478	0.152977	0.151385	0.151276	0.152999	0.150872	0.152758	0.152532	0.153056	0.152853	0.152951
YHR036W	0.0966316	0.0978446	0.0960234	0.0972549	0.0984435	0.0982456	0.0969223	0.0990175	0.100849	0.0971711	0.0960624	0.0967419	0.097076	0.0978168	0.0972745	0.0989474	0.0985592	0.097274	0.0972663	0.0979727	0.0975439	0.0975439	0.0968241
YHR038W	0.0949495	0.0932282	0.0930736	0.0969357	0.0953121	0.0943198	0.0962276	0.0966811	0.0967276	0.0932089	0.0930536	0.0959252	0.0958153	0.0963604	0.0952234	0.0966811	0.0953302	0.0939061	0.0968588	0.0966811	0.0975691	0.0981241	0.0968661
YHR039C	0.0764318	0.0795178	0.0756192	0.0763421	0.0773772	0.0786939	0.0761328	0.0788349	0.0767677	0.0765093	0.0754542	0.0761032	0.0765265	0.0769399	0.076632	0.0778013	0.0773065	0.0764135	0.0765575	0.0763657	0.0762509	0.0762509	0.0776158
YHR045W	0.120113	0.122294	0.118159	0.120055	0.120545	0.121282	0.122239	0.119727	0.11975	0.119994	0.11844	0.120185	0.119937	0.120086	0.119781	0.120915	0.120131	0.119571	0.119788	0.119846	0.119846	0.119846	0.120257
YHR046C	0.0859593	0.0865947	0.0846016	0.0869165	0.0867143	0.0866093	0.0859834	0.0869165	0.0891687	0.0866701	0.0852273	0.086273	0.0866912	0.0867288	0.0863477	0.0880426	0.0877311	0.0860502	0.0870509	0.0874795	0.0875228	0.0869165	0.087032
YHR047C	0.121692	0.122355	0.120283	0.122966	0.123565	0.122791	0.122064	0.122508	0.12301	NaN	0.121083	0.122249	0.122275	0.122422	0.122214	0.122508	0.124171	0.121701	0.122546	0.122335	0.122508	0.122508	0.122349
YHR049W	0.069045	0.070577	0.0688097	0.0697963	0.0697963	0.0700447	0.0684302	0.0697963	0.0704574	0.0677898	0.0686958	0.0684302	0.0686124	0.0688097	0.0690926	0.0697963	0.0697963	0.0686404	0.0686137	0.0688856	0.0691658	0.0684302	0.0692359
YHR050W	0.101237	0.100386	0.0999706	0.101963	0.102087	0.102513	0.101307	0.100753	0.101788	0.101809	0.100594	0.101157	0.101762	0.101526	0.101902	0.100753	0.10305	0.101545	0.102058	0.10193	0.10187	0.101963	0.101932
YHR051W	0.0745882	0.0749078	0.0730346	0.0758712	0.0728243	0.0752491	0.0750516	0.0785032	0.075833	0.0744483	0.0736871	0.0756268	0.074178	0.0744017	0.0741871	0.0740289	0.0740289	0.074201	0.0742376	0.0746503	0.0740289	0.076266	0.0740289
YHR052W	0.0885861	0.0896029	0.0870732	0.09011	0.0884977	0.0883369	0.089003	0.0929186	0.0889255	0.0888569	0.0865943	0.088624	0.0875546	0.0883503	0.0878636	0.0893819	0.0876512	0.0897219	0.0897456	0.0886451	0.0902661	0.0902661	0.0908328
YHR056C	0.107307	0.107525	0.106997	0.107757	0.108853	0.108947	0.108421	0.107006	0.108156	0.107552	0.106757	0.107126	0.107345	0.10729	0.107566	0.109153	0.108952	0.10724	0.107415	0.107165	0.107443	0.107254	0.107636
YHR057C	0.103964	0.108241	0.105627	0.102989	0.106796	0.108856	0.10675	0.108414	0.106065	0.105431	0.106571	0.105101	0.105502	0.106526	0.106355	0.106796	0.106796	0.106547	0.105045	0.104998	0.105178	0.105178	0.105219
YHR058C	0.0960737	0.0955833	0.0953108	0.0968489	0.0980699	0.0975536	0.0976715	0.0968489	0.0980992	0.0970219	0.096449	0.0959524	0.0965536	0.0969719	0.0969048	0.0968489	0.0980034	0.0956563	0.0968076	0.0964797	0.0972748	0.0957415	0.0968489
YHR059W	0.10628	0.109043	0.106266	0.106707	0.106864	0.107102	0.106916	0.106408	0.107885	0.106646	0.10563	0.10774	0.106068	0.105559	0.106485	0.106408	0.106462	0.106408	0.106533	0.106408	0.106408	0.106408	0.106408
YHR061C	0.113571	0.110763	0.111576	0.114943	0.11354	0.114753	0.112017	0.112853	0.117302	0.112983	0.111866	0.114743	0.114385	0.113607	0.113275	0.112853	0.112875	0.112933	0.115028	0.115059	0.115425	0.114943	0.114943
YHR062C	0.075702	0.0758766	0.0749551	0.0764765	0.0771251	0.0747475	0.0759481	0.0779798	0.0746465	0.0750631	0.0752329	0.0758105	0.0757576	0.075881	0.0759259	0.080202	0.076845	0.0755012	0.0757659	0.0757576	0.0757576	0.0757576	0.0757576
YHR063C	0.0852632	0.0850877	0.084269	0.0861404	0.0834233	0.0849282	0.0840852	0.0842105	0.0852784	0.0837719	0.0840278	0.0848789	0.0856725	0.0846491	0.0844498	0.0842105	0.0837066	0.0851552	0.0858143	0.0857212	0.0859649	0.0859649	0.0865947
YHR064C	0.0619975	0.063654	0.062427	0.0639529	0.0652205	0.0645415	0.0630621	0.0643166	0.0666707	0.0625193	0.0624012	0.0627853	0.0634096	0.0631828	0.0636607	0.0643166	0.0649087	0.0627943	0.0632944	0.0631141	0.0633652	0.0636982	0.0636189
YHR065C	0.0998347	0.0972128	0.0962889	0.0997082	0.0983466	0.0983826	0.0967026	0.0983466	0.0980265	0.0982846	0.0957286	0.0992914	0.0991843	0.0979608	0.0980112	0.0974206	0.0984451	0.0954111	0.0997631	0.0997795	0.0996693	0.100331	0.100314
YHR067W	0.125136	0.129105	0.126097	0.125713	0.131467	0.13068	0.126928	0.130249	0.131474	0.125393	0.125718	0.126182	0.1259	0.125965	0.127349	0.134994	0.132394	0.125595	0.125588	0.125636	0.126052	0.125504	0.12523
YHR068W	0.0574781	0.0582575	0.0567097	0.0573442	0.0584132	0.0589659	0.0572879	0.0596689	0.0583663	0.0572258	0.0557551	0.0574188	0.0570915	0.0569483	0.0570915	0.0596689	0.0581151	0.0568272	0.0571076	0.0570915	0.0570915	0.0579506	0.0570915
YHR070W	0.0995542	0.102562	0.0988647	0.100435	0.103914	0.10103	0.0999492	0.103982	0.101118	0.0986599	0.0984321	0.0995642	0.0995201	0.0995642	0.100294	0.0986806	0.103263	0.100567	0.100278	0.100448	0.100312	0.100006	0.100788
YHR071W	0.129275	0.126553	0.128824	0.133333	0.127722	0.125955	0.131801	0.127101	0.128284	0.13125	0.12806	0.130849	0.130338	0.13124	0.129249	0.130435	0.127629	0.131327	0.132263	0.131965	0.132553	0.131884	0.130435
YHR072W	0.0836045	0.0830554	0.0832505	0.0842149	0.0840055	0.083243	0.0831855	0.0841613	0.0847489	0.0837628	0.0832316	0.0834023	0.0833416	0.0835541	0.0835035	0.0837059	0.0837059	0.0835308	0.0837943	0.0838324	0.0839511	0.0841613	0.0848735
YHR073W	0.101281	0.101878	0.100692	0.102961	0.101782	0.100899	0.100377	0.101747	0.100984	0.101237	0.100923	0.101731	0.101591	0.100951	0.101111	0.100082	0.10135	0.101579	0.102054	0.102098	0.102054	0.10208	0.102122
YHR075C	0.10407	0.105161	0.103805	0.105445	0.105624	0.104575	0.10358	0.102273	0.105646	0.1048	0.103918	0.103903	0.104179	0.104179	0.104253	0.104724	0.103924	0.103907	0.104056	0.104542	0.103907	0.104724	0.103907
YHR076W	0.0918222	0.0929841	0.0904691	0.0907712	0.0918974	0.091798	0.091327	0.0906667	0.0923871	0.0912222	0.090642	0.090836	0.091437	0.091358	0.0912682	0.0906667	0.0915942	0.0914188	0.091539	0.0918025	0.0915556	0.0915556	0.0916023
YHR078W	0.0934435	0.0962227	0.0925075	0.0930069	0.0962976	0.0952303	0.0933174	0.0942457	0.0937799	0.0933244	0.0926412	0.0937873	0.0934033	0.0936106	0.0938446	0.0942457	0.0966012	0.0930886	0.0931434	0.0933432	0.0930423	0.0930423	0.0929806
YHR079C	0.107058	0.108128	0.106608	0.106879	0.108197	0.108076	0.10645	0.107669	0.107554	0.107007	0.106148	0.106945	0.106814	0.106774	0.107109	0.108565	0.108292	0.106636	0.106914	0.106923	0.106889	0.106774	0.107578
YHR081W	0.127957	0.12596	0.128634	0.129138	0.127883	0.128055	0.127855	0.123656	0.126084	0.128752	0.128634	0.128947	0.129032	0.129032	0.128489	0.125448	0.128651	0.128757	0.129092	0.129231	0.130135	0.129032	0.130824
YHR082C	0.0898649	0.0905727	NaN	0.0897683	0.0896611	0.0899731	0.0892352	0.0907336	0.0898825	0.0901203	0.0889908	0.0899369	0.0896825	0.0898398	0.0897196	0.0907336	0.0894397	0.0901396	0.0898644	0.0898398	0.0897683	0.0897683	0.0897848
YHR083W	0.123779	0.126066	0.124278	0.124513	0.125034	0.125987	0.123699	0.126354	0.125475	0.125755	0.122496	0.12443	0.124671	0.125681	0.124875	0.125344	0.123324	0.12449	0.124493	0.124334	0.124334	0.124334	0.124878
YHR084W	0.0994282	0.0991069	0.0986058	0.0996018	0.0985934	0.098034	0.099449	0.0976382	0.0985122	0.0992257	0.098243	0.0993718	0.0994766	0.0994928	0.0985843	0.0976382	0.0979058	NaN	0.0995696	0.0996003	0.0995734	0.0995734	0.100491
YHR085W	0.120316	0.121267	0.118617	0.12049	0.120493	0.120316	0.120316	0.116371	0.121302	0.121024	0.119603	0.120973	0.120447	0.120316	0.120176	0.121302	0.12084	0.120316	0.120466	0.120425	0.120316	0.120316	0.120644
YHR088W	0.0761517	0.0759185	0.0760704	0.0768837	0.0757576	0.0760647	0.0757254	0.0768837	0.0769927	0.0759687	0.0757576	0.0759185	0.0759077	0.0757576	0.0760761	0.0757576	0.0757576	0.0757576	0.075829	0.0757576	0.0757576	0.0757576	0.0758442
YHR090C	0.108711	0.109005	0.105799	0.10665	0.108013	0.107827	0.104933	0.107827	0.10627	0.105814	0.106208	0.106818	0.10767	0.107827	0.107114	0.10665	0.106925	0.107465	0.107551	0.107762	0.107827	0.10665	0.10665
YHR091C	0.126837	0.128176	0.12527	0.122442	0.126005	0.126238	0.125865	0.12619	0.127142	0.126401	0.126334	0.126955	0.12726	0.127254	0.126421	0.125673	0.12662	0.127345	0.127388	0.127715	0.127226	0.127226	0.127199
YHR099W	0.0928288	0.093023	0.0919181	0.0930989	0.0927901	0.0931311	0.092646	0.0926561	0.0924961	0.093312	0.0919756	0.0928417	0.0926985	0.0924199	0.0924234	0.093276	0.0929142	0.0929286	0.0927839	0.0927742	0.092806	0.0928332	0.0927537
YHR102W	0.106435	0.105823	0.103806	0.105783	0.104015	0.104741	0.104617	0.103653	0.105801	0.103106	0.103222	0.105114	0.10531	0.104625	0.104318	0.103959	0.104423	0.105565	0.105618	0.105835	0.106014	0.105801	0.106574
YHR103W	0.10819	0.108032	0.106174	0.107411	0.106868	0.107403	0.105376	0.106131	0.10761	0.104929	0.105387	0.107815	0.107374	0.107059	0.10672	0.106908	0.106677	0.107416	0.107358	0.107577	0.107685	0.107297	0.107735
YHR104W	0.0879989	0.0887974	0.0869262	0.0874908	0.0857188	0.0860126	0.0875488	0.0864745	0.0874908	0.0876813	0.0870673	0.0875392	0.0875585	0.0870955	0.0865874	0.0874908	0.0864745	0.0881943	0.0876544	0.0874908	0.0874908	0.0874908	0.088507
YHR105W	0.123538	0.122435	0.121384	0.123036	0.118111	0.118816	0.121434	0.119662	0.125863	0.122617	0.121406	0.12232	0.122142	0.121557	0.11985	0.119662	0.118177	0.123597	0.123202	0.123796	0.122763	0.122763	0.124313
YHR106W	0.0907839	0.0908021	0.0898716	0.0907329	0.0911304	0.0907329	0.0911482	0.0917019	0.0917957	0.0900667	0.090235	0.0903638	0.0909913	0.0905714	0.0905763	0.0897639	0.0906917	0.0917764	0.0910305	0.0910021	0.0907329	0.0907329	0.0906335
YHR107C	0.0803852	0.0786894	0.0772449	0.0791435	0.077423	0.0792024	0.079133	0.0787736	0.0790018	0.0782822	0.076699	0.0787361	0.0789308	0.0779437	0.077851	0.0803459	0.0780711	0.0793179	0.078888	0.0788609	0.0795597	0.0787736	0.0787937
YHR108W	0.0965017	0.0973671	0.0957148	0.0965335	0.0955106	0.0979212	0.096587	0.0976109	0.0959595	0.0978065	0.0951302	0.0964462	0.0967387	0.0961889	0.0961055	0.0964733	0.0970905	0.0970421	0.0968532	0.0969473	0.0970421	0.0964733	0.0964879
YHR110W	0.123389	0.12074	0.122485	0.126417	0.123882	0.122066	0.123232	0.122919	0.128069	0.123946	0.122659	0.124782	0.12438	0.122485	0.123599	0.121354	0.122886	0.122197	0.124367	0.124397	0.124484	0.124484	0.126049
YHR111W	0.127146	0.127637	0.126415	0.129527	0.127317	0.127328	0.127497	0.126503	0.126259	0.127046	0.126314	0.127295	0.127763	0.126545	0.126961	0.127259	0.127677	0.12691	0.128043	0.128645	0.128771	0.127259	0.127395
YHR113W	0.111997	0.11333	0.112245	0.113503	0.115502	0.112761	0.113008	0.111433	0.114732	0.111516	0.112337	0.113646	0.113381	0.113278	0.113933	0.113425	0.116364	0.112506	0.113428	0.113388	0.113425	0.113425	0.112642
YHR114W	0.0962502	0.0975455	0.0958484	0.0966294	0.0959559	0.0968649	0.0960481	0.0967219	0.0972968	0.0964107	0.0958921	0.096123	0.0967569	0.0962561	0.0958961	0.0946255	0.0951162	0.09648	0.0968471	0.0972169	0.0965204	0.0977702	0.0958619
YHR115C	0.0747057	0.0762601	0.0741863	0.0752105	0.0751851	0.0749565	0.0741145	0.0736329	0.0762036	0.0744231	0.072824	0.0748006	0.073684	0.074016	0.0744456	0.0751654	0.0760622	0.0742813	0.0741676	0.074016	0.0746939	0.0751654	0.0752058
YHR117W	0.117578	0.116892	0.116482	0.117761	0.116486	0.116681	0.116539	0.11602	0.11679	0.116312	0.115248	0.116737	0.116989	0.116914	0.116513	0.114982	0.116285	0.116659	0.117334	0.117347	0.117697	0.116539	0.117418
YHR118C	0.0995201	0.0992292	0.0961767	0.0995999	0.0982361	0.100233	0.0974516	0.0990676	0.100284	0.0991147	0.0955797	0.0992112	0.0993693	0.0974336	0.0984049	0.0990676	0.0981369	0.0978494	0.0992955	0.0993609	0.0993577	0.0990676	0.0990676
YHR119W	0.105977	0.107913	0.106558	0.106593	0.108899	0.107097	0.106012	0.105977	0.107404	0.106626	0.104642	0.106607	0.106675	0.105788	0.107019	0.107825	0.108966	0.106403	0.106636	0.106593	0.106924	0.106593	0.107335
YHR120W	0.109172	0.110034	0.109212	0.109542	0.110855	0.111048	0.108956	0.110543	0.110991	0.109046	0.108079	0.109286	0.109455	0.108845	0.109523	0.109848	0.110602	0.109475	0.109553	0.109463	0.109848	0.109848	0.110374
YHR121W	0.0674645	0.0653495	0.0687549	0.0673759	0.0656028	0.0656028	0.0662614	0.0656028	0.0693205	0.0689273	0.0680654	0.0668693	0.0673759	0.0665879	0.0658536	0.0654664	0.0673382	0.0668303	0.0673957	0.0675729	0.0673759	0.0673759	0.0681488
YHR122W	0.0910789	0.0920333	0.0902488	0.0920846	0.0924899	0.0922153	0.0908531	0.0906479	0.0920846	0.0915009	0.089231	0.0916057	0.0917973	0.0914461	0.0914025	0.0920846	0.0932769	0.0920846	0.091956	0.0920846	0.0920846	0.0920846	0.0920846
YHR126C	0.142078	0.146091	0.140432	0.141975	0.144824	0.145342	0.142093	0.144033	0.14317	0.14006	0.140346	0.141877	0.141564	0.141404	0.142973	0.148148	0.148061	0.143242	0.142098	0.141854	0.141975	0.141975	0.14187
YHR127W	0.146968	0.14613	0.146673	0.14741	0.146593	0.146324	0.146462	0.148738	0.147882	0.145916	0.14741	0.148043	0.14741	0.145935	0.14682	0.148738	0.144839	0.14741	0.14747	0.14741	0.14741	0.14741	0.147308
YHR128W	0.0633641	0.0651196	0.06298	0.06298	0.0641223	0.0635386	0.06298	0.0645161	0.0661018	0.06298	0.0631507	0.0630532	0.06298	0.0634067	0.0633834	0.06298	0.0644834	0.06298	0.0630488	0.0630654	0.06298	0.06298	0.06298
YHR129C	0.0988902	0.0987603	0.0964756	0.0931326	0.0988769	0.0988587	0.0993107	0.102873	0.102035	0.0982733	0.0986521	0.0991211	0.0991211	0.0983034	0.0986226	0.0988769	0.0989123	0.0994097	0.0996487	0.0996983	0.0994097	0.0994097	0.10032
YHR133C	0.108878	0.107035	0.109087	0.109345	0.107141	0.108344	0.108006	0.106164	0.110419	0.105496	0.108897	0.108462	0.107984	0.107185	0.107549	0.106995	0.106995	0.108926	0.109295	0.109214	0.109278	0.109278	0.109366
YHR137W	0.0934501	0.0932324	0.0899769	0.0924353	0.0921497	0.0923417	0.091801	0.0915694	0.0953789	0.0914924	0.090112	0.0923445	0.0917639	0.091274	0.091477	0.0916342	0.0926001	0.092183	0.0922102	0.0920666	0.0921331	0.0922827	0.0929811
YHR138C	0.100725	0.0956522	0.0974235	0.101449	0.0989967	0.0993412	0.101449	0.0956522	0.107246	0.0983696	0.0972222	0.100897	0.100097	0.0995169	0.0993412	0.0956522	0.0985507	0.100557	0.101579	0.101449	0.101449	0.101449	0.101449
YHR139C	0.0940729	0.0968664	0.0910165	0.0962513	0.0958356	0.0974487	0.0950644	0.0972644	0.0993235	0.0922302	0.0924519	0.0952381	0.0944951	0.0945064	0.0944705	0.0952381	0.0967686	0.0949264	0.0954271	0.0957447	0.0960175	0.0962513	0.0955498
YHR142W	0.0968454	0.0944119	0.0932936	0.097297	0.0962819	0.0950196	0.0954484	0.0935857	0.0957566	0.0958202	0.0949439	0.0956387	0.0961094	0.0952214	0.0951683	0.0956887	0.0955769	0.0965785	0.0966343	0.0968571	0.0967403	0.0967403	0.0966594
YHR144C	0.108234	0.108972	0.104382	0.109509	0.109229	0.108336	0.109171	0.105625	0.107961	0.104726	0.104232	0.109235	0.108529	0.106615	0.107787	0.107755	0.109817	0.109721	0.10936	0.109766	0.109066	0.109885	0.10882
YHR147C	0.0837703	0.0831723	0.080902	0.0838204	0.0812996	0.0804792	0.0826739	0.0793517	0.0854532	0.0811443	0.0818495	0.0838552	0.083486	0.0825386	0.0822645	0.080902	0.0807701	0.0840028	0.0841301	0.0842612	0.0840028	0.0840028	0.0840028
YHR148W	0.0501812	0.0520186	0.0504227	0.0507246	0.0524433	0.0523715	0.0510352	0.0507246	0.0524194	0.0510643	0.0511775	0.0508972	0.051087	0.0517311	0.0515115	0.0525362	0.051457	0.0507246	0.0508058	0.0507246	0.0507246	0.0507246	0.0507711
YHR149C	0.126748	0.124525	0.122262	0.127119	0.122746	0.123016	0.124016	0.123139	0.121859	0.126339	0.121767	0.125738	0.125816	0.122889	0.123668	0.122237	0.122352	0.125985	0.126479	0.126422	0.125985	0.126748	0.126459
YHR150W	0.106544	0.106688	0.104325	0.106417	0.106496	0.105486	0.105944	0.104963	0.106206	0.107406	0.105482	0.10625	0.106266	0.105634	0.106347	0.108412	0.105832	0.105892	0.106379	0.106272	0.106643	0.107262	0.106688
YHR151C	0.112351	0.112189	0.110798	0.112601	0.112982	0.112874	0.112523	0.112414	0.114271	0.113423	0.110245	0.113077	0.112499	0.111782	0.111865	0.111782	0.113249	0.111879	0.112365	0.112098	0.112414	0.113679	0.112447
YHR153C	0.143886	0.145513	0.14437	0.144556	0.148035	0.146536	0.146231	0.146231	0.14461	0.144786	0.143788	0.144157	0.145114	0.144649	0.145291	0.151256	0.148797	0.144556	0.144606	0.14437	0.144556	0.144556	0.144556
YHR154W	0.139743	0.139243	0.138827	0.141231	0.139602	0.13903	0.140752	0.139562	0.139602	0.140641	0.138866	0.139973	0.140076	0.139305	0.139325	0.138945	0.139339	0.140796	0.140869	0.140967	0.14089	0.140796	0.140867
YHR155W	0.106494	0.106496	0.106078	0.107145	0.106032	0.106652	0.106246	0.105763	0.106437	0.107212	0.105827	0.106912	0.106783	0.106422	0.106296	0.106061	0.105818	0.106623	0.106982	0.107039	0.106978	0.107145	0.106957
YHR156C	0.134078	0.132065	0.133429	0.133629	0.135534	0.134652	0.133446	0.133796	0.131274	0.133148	0.132828	0.13402	0.132854	0.133743	0.13333	0.135679	0.135679	0.133361	0.133799	0.133796	0.133796	0.133796	0.133989
YHR157W	0.151054	0.14998	0.148779	0.149839	0.153897	0.150527	0.15095	0.147069	0.149815	0.151711	0.149937	0.151037	0.15045	0.151698	0.150161	0.154315	0.152619	0.149716	0.150732	0.150893	0.150692	0.150692	0.150692
YHR158C	0.11362	0.115091	0.113229	0.114084	0.114817	0.1143	0.113571	0.115152	0.115966	0.113999	0.112401	0.113909	0.113771	0.113591	0.113684	0.114017	0.114234	0.112642	0.113884	0.113875	0.113886	0.114017	0.113675
YHR159W	0.116123	0.116655	0.114603	0.116306	0.116208	0.115719	0.116303	0.116191	0.118036	0.117125	0.114919	0.116191	0.116581	0.115312	0.115681	0.114892	0.116647	0.114542	0.116303	0.116191	0.116191	0.116191	0.116774
YHR160C	0.187761	0.185179	0.187005	0.1887	0.185465	0.187153	0.187476	NaN	0.192808	0.187417	0.185098	0.189455	0.189444	0.188309	0.186736	0.188114	0.185941	0.186127	0.188932	0.189222	0.189468	0.189287	0.188144
YHR162W	0.0574359	0.0564103	0.0564103	0.0589744	0.0613412	0.0582751	0.0564103	0.0564103	0.0564103	0.0568109	0.0576211	0.058486	0.057265	0.0574074	0.0577312	0.0589744	0.0615385	0.0571992	0.0586204	0.0589744	0.0577909	0.0589744	0.0590401
YHR163W	0.121393	0.123148	0.120803	0.120885	0.122772	0.124593	0.120843	0.126041	0.124713	0.121186	0.119383	0.121741	0.120641	0.121762	0.121158	0.124713	0.124063	0.121751	0.121091	0.120803	0.12124	0.120729	0.11998
YHR164C	0.115883	0.116855	0.114818	0.115295	0.116393	0.116662	0.115774	0.11545	0.116825	0.116501	0.114326	0.116251	0.115814	0.11517	0.115419	0.116105	0.115854	0.114229	0.115445	0.115401	0.11545	0.11545	0.116789
YHR165C	0.0872199	0.0880582	0.0862954	0.0876744	0.0876601	0.0881011	0.0871194	0.0880874	0.0876512	0.0876648	0.0864177	0.0876581	0.0877231	0.0865695	0.0872484	0.087541	0.0869393	0.0867423	0.0879559	0.0880874	0.0879508	0.088224	0.0879263
YHR166C	0.0759871	0.0771074	0.0762087	0.0769331	0.0773469	0.07728	0.0771377	0.0787782	0.0772691	0.078014	0.0766665	0.0776137	0.0772542	0.0773015	0.0771941	0.0766517	0.0775679	0.0761201	0.077219	0.0771833	0.0771833	0.0771833	0.0771833
YHR167W	0.0866701	0.0854978	0.0840337	0.0885074	0.0861107	0.087208	0.0863157	0.0857159	0.0843724	0.0878549	0.0846699	0.0880121	0.0863521	0.0863662	0.0856787	0.0843164	0.0869693	0.0855887	0.0880953	0.0879919	0.0881332	0.0881332	0.087122
YHR168W	0.111228	0.112627	0.1103	0.110548	0.111903	0.112629	0.111008	0.112512	0.112554	0.111148	0.110309	0.110739	0.110671	0.111442	0.111163	0.11187	0.111884	0.110487	0.110931	0.11055	0.110684	0.110586	0.110701
YHR169W	0.0804012	0.0814594	0.0801183	0.0798384	0.0806124	0.0819304	0.0804233	0.0817901	0.0834827	0.081115	0.0803862	0.0803571	0.0805556	0.0805898	0.0808626	0.0817901	0.0813469	0.0793566	0.0802901	0.0803755	0.0805437	0.0802469	0.0808405
YHR170W	0.0720471	0.0738225	0.0718294	0.0730803	0.0724497	0.0734513	0.0728224	0.0736848	0.0757981	0.0732232	0.0723022	0.073379	0.0729569	0.0721862	0.0727247	0.0743271	0.0720177	0.0727461	0.0730617	0.0731496	0.0730426	0.0730426	0.0730426
YHR171W	0.119556	0.118041	0.117224	0.119836	0.11926	0.119198	0.118915	0.119774	0.117817	0.11979	0.118006	0.119322	0.119563	0.118807	0.118993	0.119246	0.119044	0.118981	0.119512	0.119451	0.119246	0.119246	0.1193
YHR176W	0.108845	0.109993	0.108634	0.105396	0.111502	0.113067	0.110389	0.111755	0.108718	0.110166	0.10972	0.110381	0.109528	0.110827	0.110091	0.114033	0.111465	0.109594	0.109769	0.109604	0.109477	0.109477	0.111078
YHR178W	0.0950798	0.0980252	0.0954188	0.0939063	0.0981893	0.0969371	0.0941209	0.0978332	0.0960989	0.0966991	0.093888	0.0961051	0.0946074	0.0953441	0.0951471	0.0969371	0.0983193	0.0950071	0.0945131	0.0942738	0.0948693	0.0942489	0.0954667
YHR181W	0.0128027	0.0156099	0.0124388	0.0124388	0.0124388	0.0138944	0.0128547	0.0124388	0.0154439	0.0129392	0.0124388	0.0128547	0.012924	0.0125197	0.0128652	0.0126627	0.0124388	0.0124388	0.0127701	0.0126005	0.0124388	0.0124388	0.0125508
YHR182W	0.126602	0.128646	0.121423	0.126533	0.125695	0.127609	0.124235	0.126412	0.127567	0.126903	0.124835	0.125432	0.126303	0.124743	0.125666	0.125589	0.126141	0.125431	0.126583	0.126618	0.126666	0.126824	0.126679
YHR187W	0.111334	0.111465	0.108879	0.114329	0.110189	0.11085	0.110052	0.109775	0.112099	0.11122	0.109521	0.112438	0.112212	0.112045	0.111209	0.1087	0.11172	0.112091	0.113591	0.113539	0.114076	0.114076	0.113166
YHR188C	0.0933343	0.0959608	0.092419	0.0933568	0.0962006	0.0950751	0.0927342	0.0950255	0.0950607	0.0950937	0.0926463	0.0929732	0.093498	0.093601	0.0936203	0.0950255	0.0960818	0.0928433	0.092968	0.0928433	0.0928433	0.0928433	0.0930811
YHR189W	0.0928129	0.0956801	0.0932008	0.0945581	0.0967061	0.0943995	0.0943088	0.0910677	0.0945581	0.0924857	0.0930796	0.0946413	0.0950235	0.0946551	0.0940469	0.0980485	0.0979	0.0948266	0.09476	0.0946551	0.0945581	0.0945581	0.0948714
YHR190W	0.0806197	0.0819252	0.0811523	0.0815758	0.0794846	0.0815117	0.0795817	0.0799455	0.081492	0.0811628	0.0794253	0.0815863	0.081144	0.0812356	0.0803995	0.0805217	0.0799774	0.080637	0.0814241	0.0814437	0.081386	0.0814437	0.0817894
YHR191C	0.100486	0.10006	0.0989246	0.100859	0.103347	0.103121	0.10093	0.103347	0.107921	0.104591	0.100963	0.100741	0.101854	0.101412	0.102216	0.100859	0.103347	0.100859	0.100896	0.101136	0.100859	0.100859	0.100859
YHR193C	0.0479048	0.0458503	0.0457143	0.0469468	0.0457631	0.0469264	0.0460952	0.047619	0.0478034	0.0459524	0.0460847	0.0457143	0.0457143	0.0453968	0.046253	0.0457143	0.0473354	0.0457143	0.0457996	0.0462434	0.0457143	0.0457143	0.046105
YHR194W	0.0970611	0.096158	0.0956722	0.096816	0.0957975	0.0959248	0.0962442	0.095768	0.0950265	0.0971509	0.09667	0.0969175	0.0965343	0.0962789	0.0965749	0.0969175	0.0953034	0.0964312	0.097134	0.097141	0.097448	0.0969175	0.0980963
YHR195W	0.121763	0.118591	0.118755	0.124201	0.119622	0.117824	0.118265	0.116224	0.11913	0.123147	0.122076	0.122633	0.123678	0.122896	0.121087	0.120524	0.121378	0.1214	0.123826	0.124621	0.124506	0.125541	0.122648
YHR196W	0.102816	0.103216	0.100851	0.102338	0.102849	0.103218	0.101999	0.103114	0.101652	0.104225	0.100397	0.102103	0.102349	0.102604	0.101955	0.103114	0.102699	0.101922	0.102193	0.102221	0.102717	0.10254	0.102893
YHR197W	0.116728	0.116927	0.113821	0.116663	0.115692	0.116386	0.114872	0.117533	0.115708	0.115847	0.115913	0.115772	0.117011	0.115115	0.115846	0.116663	0.115126	0.116194	0.116676	0.116493	0.11683	0.117098	0.116317
YHR199C	0.104511	0.104519	0.105119	0.106012	0.107468	0.103576	0.104848	0.10494	0.105009	0.104371	0.104047	0.104226	0.105083	0.105476	0.105211	0.10494	0.106468	0.10494	0.105784	0.105774	0.106012	0.108156	0.106012
YHR200W	0.0807972	0.0788259	0.079722	0.08176	0.0799058	0.07831	0.0795296	0.0773325	0.0796133	0.080618	0.0802032	0.0797788	0.0800405	0.0801202	0.0800961	0.0773325	0.0799253	0.0800896	0.0803193	0.0800538	0.079722	0.079722	0.0798139
YHR201C	0.128521	0.130436	0.127354	0.132046	0.131635	0.131034	0.128545	0.131871	0.129332	0.130798	0.129373	0.129377	0.130029	0.129604	0.129742	0.130196	0.130945	0.128199	0.130677	0.13089	0.131368	0.130196	0.130917
YHR205W	0.0768701	0.0785845	0.0763407	0.0769364	0.0773563	0.0767102	0.075907	0.0764945	0.0762266	0.0782738	0.0756707	0.0765886	0.0761782	0.076121	0.0763667	0.0757037	0.0769235	0.0757949	0.0763499	0.0763407	0.0760991	0.0768899	0.0763323
YHR206W	0.0840682	0.0832208	0.0821522	0.0848232	0.0841779	0.0827487	0.0828646	0.0840945	0.083617	0.0837762	0.0823418	0.0843645	0.0829396	0.0833771	0.0831941	0.0845144	0.0842464	0.0827781	0.0830963	0.0831146	0.0834646	0.0818898	0.0831819
YHR207C	0.0973981	0.0956632	0.096755	0.097772	0.096155	0.0945892	0.0968153	0.0959117	0.0978296	0.0974337	0.0959556	0.0976586	0.0972189	0.0969659	0.0971256	0.0959117	0.0971498	0.097128	0.0973259	0.0971416	0.0965442	0.0971767	0.0972091
YHR208W	0.0789725	0.0810754	0.0790477	0.0791914	0.0779269	0.0811414	0.0794076	0.0808337	0.0801787	0.0786393	0.0788949	0.0792222	0.0795365	0.0796587	0.0796886	0.0782956	0.0775036	0.0784258	0.0800479	0.0801287	0.0806385	0.0799877	0.0791851
YHR209W	0.138168	0.140358	0.139932	0.137656	0.141449	0.139415	0.137851	0.138794	0.138831	0.139126	0.138336	0.139769	0.138111	0.1393	0.139644	0.142207	0.141602	0.139232	0.138365	0.137909	0.137919	0.138794	0.137773
YIL002C	0.0766683	0.0764602	0.0756871	0.0769885	0.0765358	0.0766331	0.0769774	0.0765984	0.0780059	0.0758022	0.0767656	0.0772799	0.0769009	0.0768117	0.0762494	0.0762494	0.0765539	0.0759882	0.0769475	0.0769281	0.0770549	0.0769475	0.0770907
YIL005W	NaN	0.118951	0.117704	0.119979	0.119324	0.119345	0.119304	0.118613	0.120417	NaN	0.118639	0.119537	0.119434	0.119929	0.118756	0.120508	0.120176	0.117519	0.120185	0.120982	0.120508	0.120982	0.119217
YIL007C	0.114857	0.115816	0.114882	0.11605	0.115752	0.117784	0.113812	0.11463	0.119009	0.116657	0.114086	0.114846	0.114329	0.115804	0.115133	0.116139	0.116171	0.113354	0.114546	0.116642	0.113122	0.113122	0.114824
YIL008W	0.0615	0.0605952	0.06	0.06	0.06	0.0618182	0.06	0.0633333	0.0633333	0.0603125	0.06	0.0603175	0.06	0.06	0.0605387	0.06	0.06	0.06	0.0600373	0.06	0.06	0.06	0.06
YIL010W	0.108683	0.105635	0.108446	0.103719	0.109791	0.109007	0.109768	0.108446	0.114618	0.106034	0.10761	0.109915	0.109577	0.109303	0.108726	0.108446	0.110022	0.106428	0.109966	0.109989	0.110464	0.109989	0.108446
YIL013C	0.0854653	0.0857575	0.0851328	0.0684804	0.0857205	0.0852602	0.0851816	0.0845954	0.0864751	0.0847241	0.0847855	0.0856508	0.0854919	0.0851782	0.0851582	0.0851035	0.0861032	0.0842143	0.0855071	0.0855259	0.085539	0.085539	0.0860411
YIL014W	0.11472	0.114573	0.114474	0.108009	0.114861	0.115065	0.114878	0.114969	0.117099	0.112889	0.111557	0.114164	0.114159	0.113942	0.114393	0.114441	0.115048	0.113425	0.114726	0.114852	0.114441	0.114441	0.115457
YIL015W	0.135725	0.13751	0.135164	0.136452	0.136625	0.137497	0.137668	0.138219	0.139298	0.13705	0.135447	0.137571	0.137274	0.136802	0.136724	0.135951	0.138882	0.135123	0.137836	0.137998	0.138611	0.138219	0.137696
YIL016W	0.0984375	0.100744	0.0996528	0.0990809	0.101362	0.100852	0.0989583	0.0989583	0.097211	0.096875	0.0989873	0.099752	0.099375	0.0997685	0.099758	0.103125	0.101042	0.0992788	0.099417	0.0991898	0.0989583	0.0989583	0.0991186
YIL021W	0.0641588	0.0649649	0.0647742	0.0643678	0.0649841	0.0651278	0.0644574	0.0643678	0.0648734	0.0653148	0.0646145	0.0647161	0.0643678	0.0643678	0.0646	0.0643678	0.0670357	0.0644482	0.064399	0.0643678	0.0643678	0.0643678	0.0654127
YIL022W	0.0882751	0.0842077	0.0858703	0.0884499	0.0838621	0.0848765	0.087498	0.0844557	0.0853766	0.0876144	0.0844021	0.0874319	0.0882108	0.0874992	0.0854221	0.0844557	0.0847676	0.0851086	0.0883713	0.0884423	0.0883137	0.0883137	0.0898767
YIL027C	0.0953372	0.095421	0.0950111	0.0950265	0.0948707	0.0952198	0.0948845	0.0947503	0.0971735	0.0949704	0.0949785	0.0949739	0.0960023	0.0940983	0.0950349	0.0947503	0.0947503	0.0949309	0.0961167	0.0965761	0.0970977	0.0970977	0.0949911
YIL030C	0.0903386	0.0906703	0.0903386	0.0918889	0.0915357	0.0917762	0.0916725	0.0908406	0.0940632	0.0921506	0.0906524	0.091498	0.0914932	0.0917749	0.0912235	0.0913426	0.091145	0.0914971	0.0916227	0.0917052	0.0919026	0.0915936	0.0914006
YIL031W	0.126704	0.125773	0.124581	0.126814	0.125313	0.126203	0.126268	0.125219	0.128312	0.126126	0.126331	0.126366	0.126693	0.126465	0.125519	0.126438	0.126525	0.126746	0.126604	0.12667	0.126722	0.126722	0.126401
YIL033C	0.0715476	0.071627	0.0712522	0.0715219	0.0706756	0.07114	0.0717234	0.0715079	0.0716078	0.071503	0.070679	0.0713908	0.0713228	0.0714286	0.0709075	0.0706349	0.0704998	0.0716728	0.0714671	0.0717372	0.0714286	0.0722222	0.07151
YIL034C	0.0771123	0.0769676	0.076196	0.0775463	0.0798611	0.0763889	0.0775463	0.0763889	0.0798611	0.0767144	0.0774981	0.0776014	0.077392	0.0778035	0.0776172	0.0763889	0.0804768	0.0774573	0.0775722	0.0776106	0.0775463	0.0775463	0.0781695
YIL036W	0.132044	0.132516	0.130345	0.133899	0.135162	0.133934	0.132559	0.132732	0.131773	0.131062	0.130123	0.133021	0.132842	0.132702	0.132536	0.133834	0.134901	0.133114	0.132833	0.132977	0.132605	0.13163	0.133453
YIL038C	0.0947984	0.0957341	0.0932533	0.0942479	0.0958295	0.0953602	0.0940274	0.0951465	0.0944137	0.0942775	0.0930194	0.0944937	0.093867	0.0945807	0.0945531	0.0943631	0.0961216	0.094333	0.0940241	0.0937974	0.0942125	0.093188	0.093871
YIL039W	0.0921941	0.0932289	0.0908736	0.0921238	0.0914386	0.0923795	0.0920032	0.0907173	0.0940066	0.091965	0.0909908	0.0920903	0.0918425	0.0919675	0.0913708	0.0907173	0.0909268	0.091096	0.092087	0.0922019	0.0921238	0.0921238	0.0921238
YIL040W	0.104709	0.111184	0.103723	0.104131	0.106265	0.10508	0.104332	0.108786	0.105769	0.103465	0.101858	0.10399	0.10383	0.104123	0.104377	0.106388	0.108786	0.106203	0.103936	0.10399	0.10399	0.10399	0.10399
YIL041W	0.082263	0.0808213	0.0816061	0.0829286	0.0813142	0.0815494	0.0813456	0.0805301	0.0854625	0.0852446	0.0803602	0.081598	0.0816854	0.0820591	0.081498	0.0825688	0.0815494	0.0807653	0.0819374	0.0816627	0.0819415	0.0815919	0.0816801
YIL042C	0.0949022	0.0961258	0.094063	0.0966719	0.094979	0.0947449	0.0961258	0.0961258	0.0952819	0.093937	0.0935473	0.0962464	0.0961821	0.0961727	0.0946512	0.0944381	0.094456	0.0933345	0.0961636	0.0963602	0.0961258	0.096161	0.09803
YIL044C	0.0904885	0.0932039	0.0907796	0.0922624	0.0924137	0.092936	0.0908197	0.0945576	0.0900983	0.0919606	0.0906248	0.0918502	0.0913618	0.0919564	0.0914947	0.0945576	0.0945339	0.0909559	0.092095	0.0922041	0.092328	0.0912596	0.0912131
YIL047C	0.0824105	0.0831554	0.0812846	0.0704905	0.0829647	0.0833216	0.0825133	0.0818383	0.0828743	0.0835173	0.0814044	0.0821899	0.0818875	0.0824125	0.0820101	0.0829457	0.0827651	0.0816963	0.0824375	0.082269	0.0828889	0.0825766	0.0829079
YIL048W	0.0772478	0.0774935	0.0767627	0.0752785	0.0774805	0.0764751	0.0784124	0.076843	0.0787082	0.0782614	0.0759396	0.0765126	0.0779801	0.0780476	0.0766824	0.0785776	0.0761172	0.078422	0.0785712	0.0786579	0.0782663	0.0785776	0.0788815
YIL049W	0.102547	0.104169	0.0986174	0.103176	0.0970976	0.0996182	0.101319	0.103794	0.105022	0.103425	0.0969952	0.100357	0.101869	0.101825	0.0994857	0.0998568	0.0969809	0.102381	0.102452	0.102482	0.102482	0.102482	0.10339
YIL050W	0.130785	0.130491	0.129565	0.131359	0.131403	0.130006	0.13115	0.130536	0.132905	0.131811	0.129759	0.13098	0.130925	0.130458	0.130375	0.131702	0.132247	0.130626	0.130458	0.130536	0.130536	0.130536	0.130656
YIL051C	0.0758198	0.0746457	0.0750081	0.0763436	0.0758959	0.0753425	0.0752654	0.0797011	0.0763869	0.0769899	0.075452	0.0752436	0.0752871	0.0757691	0.0759463	0.077418	0.0753292	0.0754862	0.0751945	0.0751349	0.0761887	0.077418	0.077418
YIL055C	0.112895	0.115354	0.112621	0.112874	0.113451	0.112724	0.113105	0.11306	0.113161	0.113405	0.111502	0.113787	0.112147	0.11306	0.112648	0.11306	0.113631	0.114032	0.113543	0.113732	0.11306	0.113586	0.112713
YIL056W	0.0899327	0.0889086	0.0885841	0.0897089	0.0886394	0.0888011	0.0885537	0.0875776	0.0921525	0.0904891	0.0872757	0.0895741	0.0887509	0.0887854	0.0880116	0.089648	0.0903418	0.0899666	0.0899963	0.0899931	0.0886128	0.0901656	0.0906832
YIL057C	0.0917906	0.0918339	0.0923069	0.0939772	0.0915213	0.0947658	0.0919061	0.0921947	0.0921947	0.0940255	0.0906234	0.0925795	0.0936762	0.093317	0.0931742	0.0921947	0.0921087	0.0943703	0.0942903	0.0942149	0.0942149	0.0942149	0.0923501
YIL061C	0.0996732	0.101424	0.0998548	0.103486	0.102508	0.102342	0.100311	0.102288	0.0994799	0.100775	0.100596	0.100633	0.101307	0.102215	0.101697	0.103486	0.10242	0.102229	0.102356	0.102518	0.100804	0.102397	0.102788
YIL062C	0.0641935	0.0653149	0.062055	0.0635168	0.0629556	0.0634018	0.0638095	0.0630108	0.0635657	0.0650941	0.0621744	0.0644444	0.0634409	0.0631302	0.0633192	0.0630108	0.0649325	0.0630108	0.0630268	0.0630108	0.0643342	0.0630108	0.0631762
YIL063C	0.0970393	0.101272	0.0950756	0.0976817	0.0974666	0.0977921	0.096819	0.0970859	0.0967338	0.0989541	0.0953215	0.09872	0.0975775	0.0971515	0.0966797	0.0969876	0.0981801	0.0978952	0.0979268	0.0979709	0.0992567	0.0979709	0.0980213
YIL065C	0.0897436	0.0890568	0.0898962	0.0897436	0.0894149	0.0887723	0.0897436	0.0897436	0.0913978	0.0906116	0.0898623	0.0899471	0.0897436	0.0897436	0.089809	0.0918803	0.0897891	0.0895792	0.0897595	0.0897436	0.0897436	0.0897436	0.0897436
YIL066C	0.0880651	0.0886152	0.0867603	0.089565	0.0877395	0.0880878	0.0873782	0.0862069	0.0872204	0.0858836	0.0865741	0.088451	0.0893487	0.087931	0.0876814	0.08659	0.0903298	0.0894489	0.0894708	0.0897403	0.0889773	0.0896552	0.0887022
YIL067C	0.104909	0.103976	NaN	0.103818	0.106702	0.106676	0.10404	0.106186	0.103066	0.103654	0.104597	0.103731	0.104091	0.105176	0.104748	0.105204	0.107418	0.103882	0.103898	0.103758	0.104222	0.103731	0.103756
YIL068C	0.0789507	0.0788063	0.0787899	0.0790426	0.0797955	0.0792682	0.0785109	0.0798697	0.0791226	0.0792106	0.0787554	0.0789047	0.0790426	0.0792494	0.0790468	0.0811104	0.0794474	0.079138	0.0791259	0.0791575	0.0790426	0.0790426	0.0802515
YIL071C	0.100855	0.100229	0.0990381	0.0997376	0.100462	0.0996255	0.0992013	0.0996936	0.0994519	0.0999979	0.099163	0.0995866	0.0995438	0.09986	0.0997541	0.100443	0.100459	0.0995207	0.0997439	0.0996936	0.0998088	0.0996936	0.101557
YIL072W	0.115062	0.114492	0.112495	0.115062	0.113341	0.112361	0.113081	0.113411	0.11279	0.116213	0.111303	0.114878	0.114438	0.114145	0.113306	0.112861	0.113154	0.115019	0.115043	0.115123	0.115062	0.115612	0.114526
YIL075C	0.0914553	0.0909166	0.0891199	0.0914148	0.0897834	0.0908835	0.090144	0.0892178	0.0915024	0.0902748	0.0893499	0.091248	0.0911675	0.0905489	0.0902464	0.0902748	0.0913319	0.0896514	0.0914318	0.0913515	0.0913319	0.0916843	0.0920637
YIL076W	0.0925059	0.0928258	0.0910055	0.0941441	0.0932322	0.0920964	0.0926086	0.0920314	0.0914522	0.0910303	0.0918259	0.0934453	0.0931878	0.0923999	0.0927415	0.0909091	0.0942131	0.0924631	0.0935931	0.0930291	0.0942761	0.0931538	0.0920314
YIL077C	0.125247	0.125046	0.12266	0.12606	0.12431	0.124516	0.125646	0.124044	0.121967	0.122988	0.122472	0.125083	0.12529	0.125544	0.124516	0.124044	0.124088	0.125242	0.126183	0.126121	0.126121	0.126121	0.126334
YIL078W	0.0671552	0.0667211	0.0663162	0.0669965	0.0669965	0.0667491	0.0667892	0.066543	0.0668795	0.0667272	0.0663981	0.0668453	0.0666639	0.0669209	0.0667629	0.066543	0.0676044	0.0660197	0.0669119	0.0666942	0.0669965	0.0669965	0.0674151
YIL084C	0.096711	0.0969869	0.0953899	0.095898	0.096784	0.0962676	0.0956367	0.095898	0.0958652	0.0966284	0.0950088	0.097253	0.095627	0.0958415	0.0962195	0.0969143	0.0964386	0.0956635	0.0959701	0.0959545	0.095898	0.095898	0.0970967
YIL085C	0.0987071	0.0979897	0.0969313	0.0995499	0.0987976	0.0976366	0.0975107	0.0974611	0.0975234	0.0962271	0.0958475	0.0986808	0.0980578	0.0985823	0.0975811	0.0948871	0.0987892	0.0977221	0.0991079	0.0994826	0.0989821	0.0989821	0.0996421
YIL087C	0.112112	0.112006	0.112709	0.112006	0.11206	0.113157	0.112066	0.112006	0.114048	0.110358	0.112182	0.113413	0.112287	0.112006	0.112326	0.112006	0.111916	0.112331	0.112151	0.112709	0.113629	0.112006	0.112006
YIL088C	0.109322	0.109691	0.10735	0.109424	0.108832	0.109054	0.107911	0.107388	0.109446	0.107388	0.107482	0.108681	0.108338	0.108972	0.108519	0.107388	0.108558	0.107492	0.108621	0.108519	0.109372	0.108066	0.107997
YIL090W	0.0674212	0.0681664	0.0676583	0.0673195	0.0719908	0.0693521	0.0672421	0.067997	0.0666857	0.0672772	0.0679312	0.0675131	0.0673195	0.0684111	0.068613	0.066642	0.0741523	0.0676322	0.0674282	0.0673195	0.0673195	0.067997	0.0673543
YIL091C	0.0997862	0.0995775	0.0971657	0.0989549	0.0996498	0.0992113	0.098113	0.100083	0.0984333	0.0979854	0.0972735	0.0989958	0.0981348	0.0989415	0.0986163	0.0991698	0.100627	0.097273	0.0983588	0.0983326	0.0984322	0.0982565	0.0983502
YIL093C	0.0727902	0.0731765	0.0729369	0.075243	0.0735336	0.0737564	0.074632	0.075243	0.0732953	0.0729238	0.0728496	0.0736856	0.0744044	0.0739153	0.0737183	0.075243	0.0715229	0.0738884	0.0746188	0.0750334	0.0746624	0.0739851	0.0739851
YIL094C	0.075668	0.0803659	0.0755585	0.075863	0.0788134	0.0769795	0.0762952	0.0784457	0.0757576	0.0754496	0.0766039	0.0761843	0.0760563	0.0759567	0.0766084	0.0784457	0.0800091	0.0761711	0.0758278	0.0758571	0.0761022	0.0757576	0.076332
YIL095W	0.123227	0.12364	0.121443	0.124024	0.123272	0.125655	0.123282	0.122673	0.123758	0.121425	0.121865	0.123298	0.123247	0.123744	0.123209	0.123083	0.123127	0.122894	0.123504	0.12363	0.123493	0.123493	0.123588
YIL096C	0.0996733	0.0996121	0.0984424	0.100123	0.100049	0.10152	0.0991923	0.10152	0.0985523	0.0993559	0.0982638	0.0989974	0.0991458	0.0995964	0.0992992	0.100531	0.0990995	0.098324	0.0998838	0.0999261	0.0995414	0.0995414	0.101367
YIL097W	0.0947844	0.0944181	0.0931106	0.0940868	0.0947104	0.0930653	0.0935847	0.0918998	0.0931405	0.0938429	0.0932085	0.0930902	0.09331	0.0931106	0.0932336	0.0938228	0.0941775	0.0924915	0.0937774	0.0935379	0.0938228	0.0931818	0.0939543
YIL098C	0.129934	0.129919	0.128248	0.135678	0.12812	0.129953	0.132956	0.130148	0.127584	0.128278	0.128901	0.128825	0.130433	0.131572	0.129716	0.130148	0.128147	0.129326	0.131862	0.133471	0.134421	0.130148	0.130202
YIL099W	0.119133	0.119684	0.117361	0.118588	0.119002	0.119185	0.118422	0.119404	0.115554	0.1185	0.117679	0.116734	0.118238	0.118399	0.118576	0.119404	0.119134	0.117225	0.118313	0.118466	0.118245	0.118198	0.119296
YIL103W	0.0833263	0.0824327	0.080188	0.0829812	0.0820143	0.0824327	0.0814559	0.0824327	0.0839867	0.0826998	0.0802096	0.0827657	0.0821737	0.0821306	0.081797	0.0824327	0.0814904	0.0822534	0.0824907	0.0825622	0.0824327	0.0824327	0.0832296
YIL104C	0.111838	0.11121	0.109676	0.111801	0.111591	0.110713	0.110465	0.110952	0.113111	0.11167	0.109776	0.111421	0.111433	0.111645	0.110878	0.111608	0.111427	0.110195	0.111777	0.111645	0.111608	0.111608	0.111608
YIL107C	0.0893116	0.0888844	0.0886848	0.0890663	0.0895299	0.0888596	0.0882029	0.0882374	0.0895231	0.0887281	0.0885785	0.0896561	0.0889889	0.0892663	0.0890345	0.0878349	0.0892824	0.0879897	0.0888759	0.0887966	0.0887329	0.0890426	0.0888362
YIL112W	0.137	0.135783	0.135298	0.136862	0.135716	0.135803	0.135315	0.135902	0.138495	0.137951	0.135058	0.135916	0.136666	0.136454	0.135983	0.135902	0.136404	0.135437	0.13668	0.136674	0.136716	0.136506	0.137312
YIL113W	0.131046	0.132849	0.131337	0.132442	0.134207	0.132179	0.131874	0.131602	0.130885	0.133784	0.130544	0.132055	0.131602	0.132484	0.132019	0.133189	0.136093	0.132945	0.131667	0.131602	0.131602	0.131602	0.131154
YIL114C	0.146631	0.143786	0.146638	0.147302	0.147921	0.142435	0.144056	0.141253	0.145981	0.147888	0.145718	0.147039	0.145981	0.1469	0.146334	0.147163	0.149804	0.141708	0.147331	0.147229	0.147891	0.147163	0.148345
YIL116W	0.0919023	0.0920247	0.0910692	0.0925954	0.0907653	0.0915323	0.0908557	0.0916881	0.092158	0.0922772	0.091331	0.0925042	0.0926592	0.0924022	0.0921036	0.0908312	0.0907947	0.0912926	0.0928775	0.0935447	0.0930723	0.0934019	0.092523
YIL117C	0.138313	0.140353	0.138268	0.139407	0.139488	0.13895	0.137921	0.139228	0.141817	0.136845	0.137703	0.139179	0.139295	0.139792	0.139053	0.14126	0.140936	0.13657	0.139603	0.139341	0.139228	0.139228	0.140061
YIL118W	0.0650144	0.0662972	0.0648946	0.0646552	0.0649499	0.0647858	0.0652299	0.0646552	0.0642844	0.064745	0.0647549	0.0646552	0.0636015	0.0651341	0.0650615	0.0646552	0.0651443	0.0646552	0.0651966	0.0652139	0.0646552	0.0646552	0.0650236
YIL122W	0.0936866	0.0947831	0.092363	0.0934917	0.0930105	0.0934917	0.0938631	0.0919421	0.0940805	0.093715	0.0913371	0.0936557	0.0937098	0.093573	0.0929848	0.0928891	0.093554	0.0913594	0.093935	0.0938361	0.0938361	0.0938361	0.0938118
YIL124W	0.111994	0.112681	0.112597	0.112425	0.111416	0.114297	0.115102	0.112162	0.111007	0.112092	0.111618	0.112535	0.112311	0.113032	0.112331	0.111043	0.111281	0.111818	0.113184	0.113218	0.113625	0.112162	0.114227
YIL126W	0.0893434	0.0895971	0.0889731	0.0892028	0.089162	0.0896794	0.0895608	0.0896574	0.0892055	0.0883818	0.0879431	0.0892204	0.0891421	0.0895233	0.0890304	0.0894159	0.0905363	0.08897	0.0892933	0.0894025	0.0893416	0.0894159	0.0900105
YIL127C	0.119477	0.117453	0.118162	0.119567	0.117522	0.118138	0.117294	0.11682	0.118431	0.116267	0.116999	0.118124	0.118538	0.119146	0.117878	0.11682	0.118362	0.114715	0.117511	0.117447	0.11682	0.120041	0.120413
YIL129C	0.0840744	0.0844469	0.0839175	0.0839033	0.0848144	0.0849718	0.0842741	0.0842981	0.0850513	0.0833805	0.0831776	0.0837322	0.0840185	0.0841272	0.0841781	0.0845777	0.0849942	0.0832441	0.0839329	0.0838165	0.0840077	0.0840185	0.084079
YIL131C	0.0960825	0.0935444	0.0976709	0.0984435	0.0960789	0.0960325	0.0973	0.0962199	0.0990134	0.0957259	0.0957331	0.0982163	0.0976403	0.0981672	0.096331	0.0962199	0.0977261	0.0960085	0.098687	0.0991982	0.0984404	0.0989691	0.0995859
YIL132C	0.0862928	0.0869493	0.0885254	0.0889683	0.0876268	0.0868026	0.0861593	0.0872274	0.0874786	0.090148	0.0851289	0.0882658	0.088162	0.0892177	0.0876994	0.088785	0.0872274	0.086868	0.0888959	0.088785	0.088785	0.088785	0.0889049
YIL134W	0.104944	0.110098	0.104944	0.106421	0.105642	0.10674	0.106455	0.106546	0.106719	0.10698	0.104246	0.105575	0.106404	0.107377	0.106222	0.106546	0.10591	0.105807	0.10649	0.10708	0.106546	0.106546	0.107505
YIL135C	0.0832339	0.0834002	0.0822681	0.0819516	0.0846966	0.0818251	0.0823541	0.080785	0.0823351	0.0825727	0.0819185	0.0826374	0.0822597	0.0819715	0.0822258	0.0823105	0.0861244	0.0827212	0.0817982	0.0829885	0.0815477	0.0815477	0.0830342
YIL136W	0.078605	0.0814727	0.0795961	0.0790856	0.0813344	0.0815047	0.0783998	0.0829975	0.0803755	0.078918	0.0766688	0.0800653	0.0790566	0.0803063	0.0798046	0.0813554	0.0827704	0.0790187	0.0789261	0.0788924	0.0788924	0.0788924	0.0798818
YIL137C	0.120421	0.121504	0.120519	0.121133	0.120059	0.120828	0.120978	0.118383	0.123225	0.119844	0.119998	0.120737	0.120003	0.120885	0.119781	0.121692	0.119977	0.120013	0.120569	0.120793	0.121124	0.120284	0.120862
YIL138C	0.0848578	0.0886644	0.0812342	0.0832178	0.0844964	0.0864198	0.0822564	0.090722	0.0842173	0.0810127	0.0815199	0.0822956	0.0827659	0.0831775	0.0833645	0.0845492	0.0855999	0.0834412	0.0824609	0.0824916	0.0829664	0.0824916	0.0824916
YIL139C	0.09808	0.0968461	0.0986723	0.0983062	0.0977322	0.0967979	0.0986873	0.0967979	0.100847	0.0983162	0.0982974	0.097312	0.0979675	0.0977726	0.0975613	0.0981475	0.0979178	0.0979398	0.0983338	0.0981475	0.100016	0.0981475	0.0981475
YIL140W	0.0998456	0.101112	0.0989636	0.0991417	0.102174	0.101142	0.0997158	0.101465	0.098764	0.0997577	0.0990568	0.0981173	0.0993322	0.100302	0.0999051	0.0998851	0.102196	0.10031	0.0992956	0.0998632	0.099399	0.0998851	0.0990952
YIL142W	0.0761048	0.0784632	0.0769851	0.0774287	0.0800473	0.0785698	0.0767316	0.0776515	0.0770609	0.0774148	0.0763714	0.0770503	0.0771886	0.0778269	0.0773327	0.0763889	0.0804723	0.0770202	0.0768412	0.0770202	0.0763403	0.0763889	0.0770202
YIL143C	0.0776372	0.0766244	0.0769504	0.0775105	0.0787293	0.0771219	0.0770532	0.0773015	0.0771868	0.0786344	0.0765561	0.077734	0.0777754	0.0778061	0.0774183	0.0769065	0.0791753	0.078304	0.0779587	0.0778061	0.0776964	0.0780913	0.0788508
YIL144W	0.0974492	0.0976419	0.095889	0.0960764	0.0985837	0.0980469	0.0969021	0.100412	0.0973505	0.0977322	0.0955211	0.0970856	0.0967507	0.0973341	0.0970123	0.0975215	0.099069	0.0970398	0.0970765	0.0974412	0.0970398	0.0970398	0.0971509
YIL145C	0.0955376	0.096275	0.0963441	0.0953827	0.0961401	0.0955034	0.0960061	0.0956989	0.0953174	0.0955309	0.0961022	0.0979007	0.0967025	0.0967145	0.0964158	0.0956989	0.0958591	0.0968569	0.0969828	0.0967742	0.0970223	0.0978495	0.097877
YIL146C	0.0925493	0.096032	0.0925736	0.0926247	0.0957285	0.0949457	0.0917229	0.0942066	0.0966039	0.0924086	0.0913229	0.0918242	0.0922887	0.093338	0.0928863	0.094832	0.0957634	0.0911759	0.091733	0.0914966	0.0913683	0.091705	0.0911278
YIL147C	0.107804	0.110162	0.107167	0.108023	0.110279	0.109543	0.108358	0.108007	0.109398	0.109992	0.106017	0.109731	0.109088	0.109915	0.108549	0.108549	0.111397	0.111382	0.109878	0.110735	0.110173	0.110569	0.107305
YIL149C	0.151149	0.150599	0.15004	0.150893	0.150659	0.151665	0.15088	0.152002	0.15123	0.150343	0.14972	0.151685	0.151275	0.151363	0.150627	0.151605	0.151816	0.151804	0.151732	0.151682	0.151834	0.151407	0.151727
YIL150C	0.108207	0.107217	0.107182	0.109135	0.107814	0.107746	0.107816	0.108381	0.107517	0.1084	0.106925	0.107965	0.10811	0.10864	0.10767	0.107217	0.108072	0.108381	0.10856	0.108576	0.108381	0.108381	0.108471
YIL151C	0.0953476	0.0946114	0.0942209	0.0954825	0.0953239	0.0949047	0.0947561	0.0938879	0.0946471	0.0944177	0.0939169	0.0951079	0.0950199	0.0946161	0.0943032	0.0935901	0.0958971	0.0950795	0.0952684	0.0952119	0.0950795	0.0953774	0.0961641
YIL153W	0.10196	0.105022	0.102012	0.101496	0.104417	0.104641	0.102412	0.104872	0.105634	0.102946	0.101097	0.10234	0.101721	0.102762	0.102894	0.103184	0.105274	0.101496	0.101663	0.101496	0.101496	0.101496	0.101453
YIL158W	NaN	0.133598	0.13455	0.135266	0.132995	0.133655	0.133057	0.132045	0.130331	0.133806	0.131889	0.135496	0.133885	0.13455	0.133509	0.133655	0.132045	0.135266	0.135612	0.136787	0.136876	0.136876	0.135527
YIL159W	0.108091	0.10855	0.108071	0.107708	0.108601	0.107984	0.107597	0.107972	0.109089	0.108407	0.107132	0.106993	0.10658	0.106852	0.107341	0.108213	0.109286	0.107576	0.107597	0.104507	0.107863	0.107382	0.107561
YIL160C	0.098271	0.0988007	0.0984526	0.0982311	0.0972905	0.0983036	0.0992792	0.0966362	0.100598	0.101296	0.0992833	0.0983109	0.0977526	0.0982754	0.0977317	0.0990286	0.0990455	0.0990899	0.0990226	0.096016	0.0990286	0.0990286	0.0991308
YIL161W	0.144146	0.144579	0.14371	0.144871	0.142085	0.145755	0.146438	0.141873	0.151871	0.143035	0.143882	0.144366	0.142883	0.144169	0.14339	0.141873	0.143578	0.144522	0.144757	0.143327	0.145688	0.144628	0.146041
YIL166C	0.0845304	0.0893186	0.0858741	0.0847145	0.0879098	0.088621	0.0860413	0.08717	0.089784	0.0863068	0.0854989	0.0849407	0.0854512	0.0873145	0.086374	0.0877839	0.0882411	0.0849507	0.0850623	0.0870336	0.0847145	0.0847145	0.0861627
YIR003W	0.159397	0.154826	0.153369	0.158761	0.156158	0.156502	0.157796	0.157354	0.157551	0.15731	0.156957	0.158426	0.158895	0.158737	0.156265	0.156885	0.156397	0.153495	0.159169	NaN	0.159229	NaN	0.159217
YIR004W	0.103338	0.101993	0.101711	0.103247	0.102806	0.10243	0.102943	0.101801	0.101405	0.102089	0.102068	0.102862	0.102365	0.103039	0.102221	0.103338	0.103321	0.100856	0.102911	0.102612	0.103338	0.102569	0.104224
YIR005W	0.0957778	0.0955556	0.0953968	0.0955556	0.0977778	0.0965657	0.0952381	0.0955556	0.0949104	0.0961806	0.095216	0.0955556	0.094963	0.0955556	0.0960494	0.1	0.0977778	0.0955556	0.0955556	0.0955556	0.0955556	0.0955556	0.0955556
YIR011C	0.0869081	0.0857921	0.0845644	0.0778587	0.0841638	0.0844697	0.084237	0.0866477	0.0834555	0.0862245	0.0844197	0.0860029	0.0863699	0.086532	0.0847327	0.0835227	0.0852736	0.0822407	0.0865463	0.0866477	0.0866477	0.0866477	0.0868614
YIR013C	0.10082	0.104118	0.0986642	0.0972356	0.104526	0.104074	0.0989852	0.106557	0.0983607	0.100495	0.0985883	0.101093	0.100364	0.0989678	0.101479	0.103825	0.103709	0.104666	0.0987073	0.0994232	0.102144	0.0983607	0.0987109
YIR014W	0.122222	0.118068	0.118732	0.119906	0.117337	0.117222	0.122555	0.115226	0.121687	0.1229	0.11797	0.12006	0.122542	0.122923	0.118866	0.119342	0.116977	0.115226	0.123575	0.123533	0.123457	0.123457	0.123457
YIR015W	0.148851	0.151149	0.145338	0.149696	0.149484	0.151097	0.148243	0.151724	0.147126	0.149569	0.148084	0.149316	0.148812	0.149553	0.149472	0.151724	0.149425	0.150663	0.149914	0.150192	0.151194	0.149425	0.1486
YIR018W	0.116962	0.124287	0.118357	0.115488	0.121218	0.122074	0.117872	0.118995	0.122011	0.118106	0.117679	0.11964	0.117459	0.117565	0.119771	0.12035	0.121359	0.117953	0.117832	0.118393	0.11764	0.11764	0.117953
YIR021W	0.121512	0.120079	0.122387	0.121824	0.125377	0.122794	0.120596	0.12371	0.121228	0.122651	0.118431	0.119741	0.120657	0.125083	0.122748	0.12371	0.125424	0.120892	0.121577	0.121166	0.120892	0.120047	0.120868
YIR022W	0.0779762	0.0787273	0.077381	0.0753968	0.0788055	0.077381	0.0758503	0.0813492	0.078021	0.0801091	0.075948	0.0765306	0.0763228	0.0787037	0.077401	0.0793651	0.0793651	0.0753968	0.0760483	0.0764991	0.0752442	0.0753968	0.0755495
YIR026C	0.0768588	NaN	0.0754724	0.0779784	0.0785004	0.0787713	0.0773141	NaN	0.0793471	0.0779723	0.0754597	0.0773662	0.0770105	0.0776987	0.077971	0.0793178	0.078407	0.078337	0.0777521	0.0775469	0.0781268	0.078407	0.077543
YIR027C	0.109097	0.11028	0.109595	0.109198	0.11303	0.11079	0.108508	0.111372	0.109904	0.109617	0.108835	0.10995	0.10995	0.110503	0.110747	0.10995	0.113459	0.111098	0.109306	0.109437	0.10924	0.10924	0.109294
YIR028W	0.0755459	0.0722549	0.0711881	0.0763046	0.072677	0.0718329	0.0732845	0.0731649	0.0720171	0.0734548	0.0718422	0.0742364	0.0733394	0.0747929	0.0734724	0.0742115	0.0736993	0.0720781	0.0760342	0.0760139	0.0758619	0.0763046	0.0753923
YIR029W	0.0953312	0.0937185	0.0928764	0.0933704	0.0952368	0.0952255	0.0936424	0.0951374	0.0951374	0.0962275	0.0925938	0.095322	0.0934578	0.0945991	0.0944816	0.0941684	0.0965806	0.0946157	0.093461	0.0935224	0.0931994	0.0931994	0.0959814
YIR030C	0.126178	0.12544	0.122044	0.126734	0.120898	0.122325	0.123544	0.125294	0.124855	0.125719	0.120437	0.124387	0.123933	0.12605	0.123301	0.121212	0.123933	0.125398	0.126659	0.12673	0.126654	0.126654	0.127247
YIR032C	0.112825	0.112825	0.111549	0.115101	0.114798	0.109771	0.111962	0.110699	0.116679	0.113728	0.11162	0.113452	0.113193	0.114573	0.113276	0.108998	0.1141	0.113315	0.114246	0.114006	0.1141	0.1141	0.114187
YIR033W	0.0896085	0.0900711	0.0889147	0.0908582	0.0898119	0.0903144	0.0898757	0.0903684	0.0909919	0.0902569	0.0883489	0.0894056	0.0897341	0.0897407	0.0894223	0.0900711	0.0903431	0.0898881	0.0902919	0.0903354	0.0901855	0.0903684	0.0903608
YIR035C	0.0811349	0.0810882	0.0789199	0.0834225	0.0800037	0.0815211	0.0811816	0.0834225	0.0812298	0.0820744	0.0792104	0.0819002	0.0819093	0.0822605	0.0807697	0.0808081	0.0818928	0.0819142	0.0831902	0.0835677	0.0833219	0.0834225	0.0832214
YIR036C	0.135456	0.136972	0.134554	0.136236	0.137424	0.137442	0.135081	0.143321	0.136442	0.134831	0.134589	0.135426	0.135081	0.135241	0.136029	0.138577	0.137435	0.137424	0.135601	0.136219	0.135408	0.13608	0.13587
YIR038C	0.0948614	0.0915078	0.0927574	0.0947321	0.0933393	0.0931012	0.0936354	0.0903933	0.0946029	0.0943827	0.0917526	0.0934328	0.0937975	0.0928362	0.0922559	0.0918117	0.0944072	0.0922482	0.0946486	0.0948062	0.0946486	0.0946486	0.0958125
YJL002C	NaN	0.121623	0.120993	0.122341	0.122492	0.123182	0.121548	0.122546	0.121216	0.122262	0.121113	0.121914	0.122267	0.121692	0.121869	0.123245	0.12323	0.120557	0.122056	0.122663	0.121847	0.121847	0.122546
YJL003W	0.0777311	0.0784314	0.0784314	0.0790905	0.0784314	0.0784314	0.0784314	0.0784314	0.0784314	0.0784314	0.0785481	0.0785648	0.0788049	0.0787426	0.0785445	0.0784314	0.0784314	0.0784314	0.0794348	0.0790538	0.0808016	0.0784314	0.0784314
YJL004C	0.120588	0.120331	0.120007	0.120915	0.120789	0.120766	0.120168	0.120915	0.122496	0.119485	0.119871	0.120837	0.120806	0.120824	0.120535	0.119281	0.120915	0.119281	0.120994	0.121823	0.120915	0.120915	0.120915
YJL005W	NaN	0.0927932	0.0915489	0.0924664	0.0932956	0.093046	0.0921624	0.0927641	0.0939015	0.0931504	0.0915738	0.0928496	0.0926335	0.0919751	0.0922679	0.0930906	0.0929968	0.0914331	0.0925186	0.0920748	0.092852	0.0924376	0.0923623
YJL006C	0.0982744	0.0976498	0.0951023	0.100135	0.0981227	0.097456	0.0978408	0.100075	0.0980504	0.0974385	0.0961596	0.0976743	0.0992518	0.0980172	0.0977521	0.0980172	0.0977545	0.096197	0.09989	0.100018	0.100075	0.100075	0.100075
YJL008C	0.0707967	0.0707716	0.0703508	0.0721045	0.0703408	0.0707355	0.0712193	0.0715876	0.0713797	0.0713496	0.0702858	0.0707228	0.0713923	0.0709367	0.0707059	0.0704159	0.0710641	0.0708666	0.0715941	0.0707414	0.0721734	0.0721734	0.0721133
YJL011C	0.0992097	0.0993934	0.0989525	0.100889	0.10101	0.100075	0.0993052	0.0989525	0.0989525	0.101525	0.0988382	0.0993444	0.099364	0.100781	0.0997215	0.0989525	0.09904	0.0989525	0.0993901	0.0990668	0.0989525	0.0989525	0.0986887
YJL012C	0.0737835	0.0736649	0.072677	0.0737347	0.0751763	0.0738925	0.0736254	0.0735991	0.074893	0.0734406	0.0730228	0.0740381	0.0735376	0.0742138	0.0737621	0.0735991	0.0750214	0.0738473	0.0735423	0.0736247	0.0735991	0.073138	0.0731026
YJL014W	0.0604754	0.0617598	0.0600099	0.0603837	0.060368	0.0607173	0.0604186	0.0603837	0.0609953	0.0612629	0.0600354	0.0605002	0.0603429	0.0600778	0.0603898	0.0603837	0.0603837	0.0600543	0.0604407	0.0603497	0.0603837	0.0603837	0.0615755
YJL016W	0.0950555	0.0970637	0.0946206	0.0750186	0.0967117	0.0958697	0.0947311	0.0974873	0.095995	0.0955041	0.0937968	0.0953126	0.0952443	0.0951478	0.095714	0.0968942	0.0955403	0.0945217	0.0951281	0.0950489	0.0951149	0.0951149	0.0945521
YJL019W	0.104251	0.102881	0.102645	0.102389	0.102673	0.102987	0.102675	0.102812	0.104208	0.104551	0.102939	0.104	0.102812	0.103265	0.102953	0.102333	0.103149	0.102333	0.102934	0.103079	0.103218	0.102852	0.104263
YJL023C	0.129023	0.131123	0.128459	0.132015	0.132012	0.130442	0.129584	0.128352	0.130206	0.130298	0.128086	0.12931	0.130013	0.128991	0.129446	0.131226	0.132836	0.128426	0.130311	0.130694	0.130489	0.131226	0.131226
YJL025W	0.11884	0.121682	0.118129	0.120428	0.120605	0.121153	0.119652	0.122974	0.120432	0.119335	0.118425	0.120298	0.120261	0.120139	0.120449	0.121036	0.122479	0.120887	0.119884	0.11978	0.119744	0.119744	0.121614
YJL026W	0.0440758	0.0436174	0.0438173	0.0450758	0.044392	0.0439394	0.0452186	0.0442424	0.0469575	0.043982	0.0439068	0.0442027	0.0444091	0.0445665	0.0438215	0.0450758	0.0458204	0.0437296	0.0450571	0.0450758	0.0455245	0.0442424	0.045674
YJL029C	0.10306	0.100126	0.100802	0.102486	0.0996396	0.100363	0.101689	0.102415	0.10313	0.101848	0.102152	0.10157	0.101824	0.102168	0.100513	0.0999963	0.0996447	0.100058	0.102221	0.102303	0.102167	0.102012	0.102652
YJL030W	0.0807953	0.0836959	0.0827223	0.0812183	0.0852098	0.0835256	0.081315	0.0862944	0.0812183	0.0812183	0.0817588	0.0833938	0.0815567	0.0825343	0.0837478	0.0846024	0.0854304	0.0840817	0.0813004	0.0817823	0.0812183	0.0812183	0.0812183
YJL033W	0.0740143	0.0766113	0.0745364	0.0748271	0.0767912	0.0766211	0.0748256	0.075208	0.073857	0.0748338	0.0739187	0.075208	0.0754671	0.0747283	0.0756834	0.0769352	0.0766687	0.0746102	0.0752854	0.0748962	0.0762045	0.0747763	0.0749755
YJL034W	0.0651471	0.0636516	0.0632952	0.0633542	0.0659211	0.0640224	0.0632402	0.0627801	0.0655194	0.0635426	0.0630038	0.063454	0.063138	0.0636206	0.0636132	0.0623296	0.0657083	0.0638688	0.0632827	0.0635392	0.0632306	0.0627801	0.0637812
YJL035C	0.0911765	0.0886003	0.0879052	0.0910279	0.0909274	0.0888673	0.0902402	0.0871064	0.0871064	0.0908645	0.0882501	0.0901395	0.0908457	0.0895491	0.0894218	0.0910279	0.089832	0.0880113	0.091145	0.0908101	0.0913296	0.0910279	0.0925362
YJL036W	0.0950333	0.0941712	0.0932477	0.0951258	0.0935131	0.0941252	0.0937332	0.0943396	0.0961656	0.0936272	0.094285	0.0947514	0.095021	0.0943833	0.0938076	0.0935535	0.0934698	0.094642	0.0951962	0.0951258	0.0951258	0.0951258	0.0951863
YJL047C	0.123821	0.124811	0.123317	0.124249	0.123924	0.124294	0.12397	0.124807	0.124705	0.123559	0.122898	0.124203	0.12415	0.124935	0.12393	0.125202	0.12471	0.123833	0.125379	0.124851	0.125415	0.125598	0.12503
YJL048C	0.108232	0.108965	0.106277	0.108308	0.107347	0.108731	0.106249	0.110492	0.109711	0.107642	0.106614	0.10784	0.107479	0.107354	0.107712	0.108071	0.107264	0.107388	0.107357	0.107129	0.108071	0.107264	0.107613
YJL050W	0.0837058	0.0843672	0.0826297	0.0838878	0.0845373	0.0847214	0.0828067	0.0834231	0.0826096	0.0834516	0.0826635	0.0840742	0.083727	0.0841014	0.0837884	0.0840308	0.08427	0.0835634	0.084058	0.0840477	0.0840308	0.083727	0.0845451
YJL051W	0.113555	0.113014	0.112955	0.11369	0.113322	0.113185	0.112187	0.114143	0.112104	0.113219	0.112523	0.113506	0.113217	0.11412	0.113243	0.112118	0.113755	0.113239	0.114143	0.114075	0.114143	0.114143	0.112948
YJL053W	0.0929147	0.0959473	0.0918572	0.0932217	0.0968429	0.095933	0.0926954	0.0958533	0.0938725	0.0938522	0.0928075	0.0946001	0.093865	0.0954147	0.0946305	0.0958533	0.0961706	0.0930867	0.093297	0.0940502	0.0932217	0.0932217	0.0906126
YJL054W	0.118727	0.117538	0.118153	0.120037	0.118017	0.11793	0.118316	0.119385	0.118983	0.119169	0.11797	0.119022	0.119385	0.1185	0.118349	0.118692	0.118054	0.119918	0.119615	0.119809	0.120771	0.119385	0.118923
YJL056C	0.111365	0.111223	0.109153	0.112952	0.110046	0.111555	0.106268	0.111009	0.113636	0.1109	0.107839	0.112045	0.112085	0.108756	0.10978	0.111009	0.110234	0.112366	0.112893	0.112802	0.113636	0.11251	0.112289
YJL057C	0.0927734	0.0923472	0.0904234	0.0917537	0.0920949	0.0921321	0.0915251	0.0917244	0.0935246	0.0905566	0.0896345	0.0932939	0.0921562	0.0926102	0.0918312	0.0912262	0.0926255	0.0921843	0.0918155	0.0916414	0.0917244	0.0912262	0.0925676
YJL058C	0.0993873	0.102372	0.0992987	0.0992287	0.102627	0.10244	0.0989321	0.102328	0.100293	0.098652	0.0989328	0.0999942	0.100123	0.101716	0.100701	0.102941	0.102641	0.100396	0.100332	0.100422	0.100066	0.0998775	0.0993118
YJL059W	0.0960213	0.0982626	0.0945272	0.0952063	0.0997411	0.099874	0.0959515	0.0992813	0.0965734	0.0950281	0.094663	0.0961378	0.0960213	0.0986927	0.0966882	0.0976513	0.100686	0.0953317	0.0952763	0.0952063	0.0952063	0.0952063	0.0957915
YJL060W	0.100323	0.0989056	0.0980138	0.100511	0.0997617	0.099966	0.0990554	0.0990126	0.101066	0.101541	0.0993455	0.10019	0.10106	0.10101	0.0994741	0.0975145	0.0998254	0.0987821	0.101377	0.101093	0.102182	0.10126	0.101102
YJL061W	0.131799	0.133451	0.129352	0.132486	0.130525	0.132994	0.130927	0.130155	0.134922	0.13151	0.130317	0.131531	0.132424	0.132123	0.130828	0.13435	0.13069	0.130191	0.132444	0.13246	0.132486	0.132019	0.132187
YJL062W	0.113137	0.114352	0.112074	0.114115	0.114491	0.116286	0.112607	0.113077	0.113594	0.111522	0.112525	0.113783	0.113959	0.114369	0.113729	0.11428	0.114818	0.111935	0.114023	0.113923	0.11465	0.113879	0.114043
YJL063C	0.10213	0.103799	0.101196	0.101049	0.101074	0.101093	0.102296	0.102335	0.103701	0.101353	0.100494	0.101684	0.101788	0.102183	0.101879	0.103701	0.100882	0.104962	0.102116	0.102411	0.100969	0.102335	0.102335
YJL066C	0.104833	0.106856	0.104138	0.105162	0.106581	0.106719	0.104936	0.105162	0.104652	0.105587	0.104522	0.105664	0.105689	0.107212	0.106027	0.103845	0.106676	0.104757	0.105605	0.106041	0.10577	0.105162	0.107865
YJL068C	0.116465	0.117814	0.114366	0.117903	0.120207	0.119596	0.115354	0.118687	0.115425	0.115946	0.11398	0.118211	0.117428	0.119428	0.117542	0.120909	0.1215	0.117661	0.117592	0.117823	0.117576	0.117576	0.117604
YJL070C	0.098749	0.101508	0.0980199	0.0990137	0.0993643	0.0994989	0.0971314	0.0994239	0.0990668	0.0983272	0.0979887	0.0979098	0.0980741	0.0980824	0.0984668	0.098749	0.099116	0.0971338	0.0983611	0.0983949	0.0987202	0.0979991	0.0980664
YJL071W	0.126278	0.125886	0.123881	0.126717	0.126271	0.125051	0.125028	0.124731	0.127768	0.124334	0.124217	0.126486	0.12672	0.127042	0.125893	0.127829	0.126329	0.122953	0.126803	0.126715	0.126993	0.127042	0.126908
YJL072C	0.0807916	0.0822713	0.0808002	0.0809886	0.0823113	0.0826961	0.0806247	0.0807137	0.0838289	0.0810544	0.0810382	0.080862	0.0809214	0.0818386	0.0819724	0.0822713	0.082437	0.0820317	0.0808009	0.0807137	0.0813128	0.0807137	0.0806737
YJL073W	0.117558	0.118186	0.115977	0.118316	0.116085	0.117518	0.117216	0.118921	0.120503	0.117809	0.117101	0.119043	0.118886	0.117635	0.117343	0.120464	0.117235	0.116863	0.118957	0.119464	0.118921	0.118406	0.119488
YJL076W	0.118814	0.11933	0.118285	0.120239	0.119177	0.119245	0.117319	0.117812	0.121635	0.117734	0.117176	0.119345	0.118841	0.119602	0.118639	0.119671	0.119286	0.118577	0.119245	0.119689	0.11953	0.121126	0.118259
YJL080C	0.0755135	0.0787238	0.0749124	0.0760979	0.0777998	0.0779504	0.0762903	0.0776531	0.0762727	0.0752512	0.0756808	0.0771209	0.0759087	0.0767143	0.0770364	0.0776531	0.0778734	0.0762274	0.0760045	0.0759269	0.0760177	0.0757565	0.075864
YJL081C	0.0893878	0.0896016	0.0853364	0.0898759	0.0880516	0.0890538	0.0888241	0.0884354	0.0902787	0.0876701	0.0870181	0.0889213	0.0892971	0.0897203	0.0886621	0.0884354	0.0884498	0.0880691	0.0899178	0.0900983	0.0897959	0.0897959	0.0897959
YJL082W	0.0938237	0.0920082	0.091186	0.0939703	0.092846	0.0928672	0.0927856	0.0934882	0.0945752	0.0931751	0.0920335	0.09364	0.093731	0.0944495	0.093249	0.0939435	0.0947186	0.0914215	0.0944176	0.0943483	0.0946091	0.0939435	0.0945507
YJL083W	0.113236	0.11334	0.111387	0.112206	0.112934	0.114307	0.112356	0.113128	0.115341	0.112115	0.11258	0.113668	0.113452	0.114569	0.113128	0.113668	0.112703	0.112498	0.113662	0.113398	0.113668	0.113128	0.113284
YJL085W	0.0979822	0.0989705	0.0970415	0.0989076	0.0997155	0.0994075	0.0982073	0.0995047	0.0985052	0.0981525	0.0973011	0.0988178	0.098828	0.0989408	0.0984956	0.100573	0.10113	0.0974501	0.0989386	0.0991782	0.0992581	0.0989705	0.09845
YJL087C	0.116874	0.117869	0.115043	0.116342	0.117025	0.117133	0.116169	0.118178	0.116476	0.116959	0.115438	0.115856	0.115921	0.11654	0.116651	0.117096	0.117548	0.116264	0.115933	0.115805	0.11611	0.115895	0.116377
YJL088W	0.0900197	0.0901812	0.0890418	0.0913876	0.0905126	0.091356	0.0908836	0.0914454	0.0914454	0.091046	0.0893423	0.0906963	0.0901999	0.0905714	0.0904323	0.0914454	0.0904621	0.0902352	0.0905392	0.0905168	0.090916	0.0904621	0.0905126
YJL089W	0.118931	0.120584	0.116609	0.118621	0.119949	0.12103	0.118103	0.119753	0.119352	0.119992	0.117777	0.118334	0.11847	0.119123	0.11922	0.119753	0.119753	0.118365	0.118421	0.118396	0.118693	0.118166	0.11854
YJL090C	0.121891	0.120068	0.119718	0.12166	0.118604	0.11939	0.119952	0.120301	0.122857	0.11943	0.118613	0.120695	0.120998	0.121027	0.119835	0.118122	0.118994	0.119195	0.121725	0.121584	0.122077	0.121608	0.12191
YJL091C	0.120367	0.122369	0.118805	0.121201	0.118318	0.120348	0.119465	0.119484	0.122572	0.119951	0.118795	0.119904	0.12123	0.12054	0.119758	0.119484	0.119484	0.118805	0.121321	0.121257	0.120372	0.12087	0.121068
YJL092W	0.11276	0.114224	0.111379	0.112823	0.112309	0.113181	0.110575	0.112873	0.112709	0.112961	0.111442	0.11286	0.113174	0.113265	0.11236	0.113155	0.112741	0.111701	0.113226	0.113296	0.112982	0.113155	0.113257
YJL094C	0.095614	0.0950883	0.0932918	0.0967604	0.0946821	0.095243	0.0904227	0.0951182	0.0968726	0.0958	0.0946002	0.0960372	0.096059	0.095792	0.09474	0.0949657	0.0955012	0.0952004	0.0968029	0.0970209	0.0968726	0.096523	0.0964326
YJL095W	0.100233	0.101319	0.0986156	0.101237	0.100791	0.10171	0.0992614	0.10067	0.100728	0.100621	0.0990795	0.100884	0.100715	0.101106	0.100093	0.100446	0.100828	0.100205	0.101033	0.101218	0.101222	0.100035	0.100285
YJL096W	0.112963	0.109715	0.111797	0.113411	0.111058	0.111485	0.108642	0.106996	0.113169	0.11304	0.110425	0.113169	0.112757	0.112711	0.111277	0.111111	0.111111	0.112061	0.113215	0.113169	0.113169	0.113169	0.113327
YJL098W	0.114981	0.115147	0.11421	0.114943	0.114668	0.113848	0.111888	0.114158	0.114899	0.114003	0.113309	0.11512	0.115007	0.114486	0.113973	0.114158	0.115241	0.114827	0.115235	0.115555	0.115519	0.114508	0.115376
YJL100W	0.104487	0.104743	0.103328	0.104741	0.102941	0.104815	0.102056	0.10616	0.105718	0.105064	0.102277	0.103863	0.103675	0.103663	0.102678	0.102871	0.103186	0.103166	0.104554	0.104424	0.104431	0.103419	0.104656
YJL102W	0.117666	0.116347	0.11593	0.11858	0.11693	0.11711	0.116307	0.119146	0.119302	0.118483	0.114984	0.118312	0.117561	0.117164	0.116589	0.116667	0.116407	0.117042	0.118444	0.118473	0.118293	0.11831	0.119116
YJL104W	0.0758687	0.0766306	0.0757576	0.076019	0.0757576	0.0757576	0.0757576	0.0757576	0.0734637	0.0757576	0.0758193	0.0759692	0.076202	0.0761279	0.0759147	0.0735354	0.076845	0.0757576	0.0760395	0.0762514	0.0757576	0.0757576	0.0757576
YJL105W	0.104083	0.103483	0.101459	0.103928	0.103666	0.103651	0.103113	0.103062	0.10424	0.105253	0.102703	0.10382	0.104201	0.104142	0.103235	0.102473	0.103676	0.103017	0.104579	0.10496	0.104829	0.104829	0.104482
YJL106W	0.0953702	0.096051	0.095127	0.0954384	0.0940484	0.0947497	0.0952341	0.0960142	0.09515	0.0956278	0.0948121	0.0960142	0.096289	0.0950697	0.0950723	0.0949838	0.0943261	0.0952613	0.0970812	0.0972164	0.097005	0.0970661	0.096939
YJL108C	0.0942708	0.093285	0.0924961	0.0946691	0.0938871	0.0935922	0.0916915	0.0928819	0.0946461	0.0927463	0.0912905	0.093626	0.0950231	0.0944252	0.0931625	0.0946181	0.09375	0.0918803	0.0953144	0.095245	0.0954193	0.0954861	0.0952413
YJL109C	0.0963352	0.0972497	0.0953556	0.0961409	0.0968569	0.0974319	0.0956989	0.0979627	0.0979809	0.0957338	0.095007	0.0960909	0.0958512	0.0967757	0.0962508	0.0970211	0.0970211	0.0963771	0.096027	0.0960338	0.0958503	0.0959239	0.0960483
YJL110C	0.14257	0.143575	0.140627	0.143658	0.143198	0.143336	0.142376	0.143445	0.149133	0.143162	0.141927	0.142726	0.143325	0.143311	0.142317	0.142841	0.144319	0.14326	0.144135	0.144049	0.144653	0.144049	0.144297
YJL111W	0.0706897	0.0726601	0.0706796	0.0707804	0.0727039	0.0716603	0.0707977	0.0707804	0.0707609	0.0701187	0.0709652	0.0719903	0.0709014	0.0716206	0.0717092	0.0719903	0.0728398	0.0719903	0.0709091	0.0709821	0.0707804	0.0707804	0.0709355
YJL112W	0.104416	0.104773	0.102044	0.104254	0.103289	0.104556	0.103224	0.105955	0.10603	0.10393	0.103624	0.103668	0.104307	0.10453	0.10344	0.105022	0.103753	0.103444	0.104179	0.104219	0.10409	0.10409	0.10409
YJL116C	0.0938069	0.0942442	0.0935693	0.0945729	0.0943252	0.0942663	0.094029	0.0940012	0.0959762	0.0938494	0.0935018	0.0936432	0.0941956	0.0934073	0.0936407	0.0930294	0.0942494	0.0940012	0.0940448	0.0940552	0.0940012	0.0940012	0.0938268
YJL117W	0.108076	0.109907	0.108165	0.110071	0.106768	0.110043	0.110129	0.111014	0.109222	0.109044	0.108358	0.110556	0.110088	0.109589	0.108726	0.108877	0.106809	0.11011	0.110512	0.110717	0.109946	0.10999	0.111124
YJL118W	0.0615892	0.060582	0.0589815	0.0633551	0.0592972	0.0591246	0.0626878	0.0607407	0.0617443	0.062846	0.0584362	0.0617989	0.062716	0.0618107	0.0597381	0.0577778	0.058944	0.0597151	0.0632615	0.063786	0.062792	0.0651852	0.0623362
YJL121C	0.0637949	0.0615472	0.0622684	0.0628883	0.0618512	0.0631419	0.062968	0.0628883	0.0651378	0.0634113	0.0617067	0.0620249	0.0629813	0.0628883	0.0619021	0.0614936	0.0625916	0.0626737	0.0627473	0.0622684	0.0628883	0.0629464	0.0631386
YJL122W	0.0926136	0.0934118	0.0920665	0.0935829	0.0933372	0.0933196	0.0930736	0.0909091	0.0946359	0.0932765	0.0916982	0.0935245	0.0948232	0.0951178	0.0929561	0.092803	0.0928836	0.0930944	0.0948312	0.0944865	0.0945513	0.094697	0.0949398
YJL124C	0.0635838	0.0631709	0.0632627	0.0638105	0.063238	NaN	0.0645197	0.0635838	0.0637703	0.0635838	0.0636641	0.0635838	0.0643545	0.0639049	0.0635254	0.0635838	0.0653056	0.0635838	0.0641949	0.0635838	0.0635838	0.0635838	0.0656094
YJL125C	0.090007	0.0924125	0.0893818	0.0902521	0.0922969	0.0934864	0.0900991	0.0917682	0.0934864	0.0904258	0.0901932	0.0901318	0.0901645	0.091625	0.0909525	0.0917682	0.0917682	0.0938829	0.0902263	0.09005	0.09005	0.09005	0.0926053
YJL126W	0.113238	0.113137	0.112751	0.114979	0.113167	0.113994	0.11374	0.114915	0.113833	0.113799	0.112555	0.113421	0.114122	0.113713	0.113133	0.111669	0.112751	0.114666	0.114019	0.113893	0.113833	0.112796	0.114111
YJL127C	0.111316	0.109658	0.110181	0.111015	0.111447	0.110471	0.110515	0.1091	0.110308	0.111427	0.109656	0.110636	0.110556	0.111048	0.110566	0.10962	0.11066	0.110612	0.110657	0.110678	0.111036	0.110556	0.11106
YJL128C	0.0881415	0.0891878	0.088136	0.0889534	0.0887151	0.0897767	0.0883622	0.0871948	0.0886414	0.0884872	0.0872986	0.0881439	0.0882578	0.0880806	0.0881964	0.0886896	0.088838	0.0880763	0.0883438	0.0884681	0.0881913	0.0881913	0.0883191
YJL131C	0.120189	0.121203	0.117572	0.117352	0.120152	0.120363	0.117928	0.119676	0.124588	0.11866	0.118031	0.117635	0.118649	0.118524	0.119052	0.119769	0.119888	0.119554	0.11801	0.117954	0.117902	0.117902	0.118476
YJL132W	0.122407	0.12109	0.118647	0.121428	0.122852	0.122502	0.121707	0.119681	0.119109	0.121191	0.120019	0.121348	0.121631	0.121651	0.120409	0.124557	0.122897	0.122272	0.12175	0.1217	0.121795	0.121897	0.121629
YJL133W	0.05886	0.0594345	0.0587248	0.0595479	0.0614201	0.0608947	0.0589734	0.0595479	0.0596503	0.0586219	0.058813	0.0589432	0.0599006	0.0596654	0.0596013	0.0595479	0.0616417	0.0584897	0.0595439	0.0593715	0.0595479	0.0595479	0.0588646
YJL134W	0.0906024	0.0901119	0.088778	0.0904135	0.0898573	0.0897265	0.0895006	0.089357	0.093701	0.0900568	0.0882319	0.0894346	0.0895836	0.0895253	0.0889314	0.089357	0.0896683	0.089556	0.0895715	0.0894596	0.0895048	0.0895048	0.0895882
YJL140W	0.0612855	0.0621397	0.060725	0.0617251	0.0600974	0.0606061	0.060773	0.0612855	0.059839	0.0610987	0.0604758	0.060289	0.0614848	0.0618668	0.0603645	0.0612855	0.0600134	0.0595608	0.0612855	0.0612025	0.0612855	0.0612855	0.0615155
YJL143W	0.0733943	0.0732596	0.0745823	0.0752811	0.0731847	0.0747094	0.0740233	0.0731847	0.0731847	0.0752811	0.0741164	0.0746821	0.0747221	0.0751646	0.0737776	0.0752811	0.0731847	0.0731847	0.0750856	0.0751646	0.0752811	0.0773775	0.0752811
YJL144W	0.112063	0.113152	0.104938	0.11746	0.113553	0.11544	0.107029	0.114286	0.114286	0.107044	0.107055	0.114739	0.116614	0.118166	0.111922	0.111111	0.114691	0.109646	0.117602	0.117284	0.11746	0.11746	0.120554
YJL145W	0.121947	0.120082	0.117948	0.120282	0.123211	0.120288	0.119598	0.118952	0.123654	0.120188	0.118434	0.119975	0.120308	0.120773	0.119751	0.120082	0.121356	0.120517	0.120251	0.120271	0.120604	0.120082	0.120171
YJL146W	0.110932	0.111785	0.108912	0.108666	0.108542	0.112057	0.110049	0.109542	0.113798	0.10836	0.108912	0.109776	0.110853	0.111405	0.109811	0.110251	0.109527	0.109423	0.110278	0.110251	0.110251	0.110251	0.110324
YJL147C	0.139453	0.135058	0.133778	0.13941	0.136732	0.137511	0.138813	0.135928	0.137304	0.137978	0.134998	0.138374	0.139062	0.139361	0.136043	0.133318	0.136428	0.135326	0.139195	0.138975	0.13941	0.13941	0.139454
YJL149W	0.0980101	0.101555	0.0980953	0.0988891	0.100551	0.101586	0.0988882	0.102408	0.0997302	0.0977665	0.0980198	0.0994308	0.0986264	0.0992206	0.0993796	0.102358	0.101008	0.0991672	0.0984531	0.098471	0.0983599	0.0988597	0.0982958
YJL153C	0.0991516	0.102706	0.0987875	0.0999686	0.0996758	0.101124	0.100146	0.102429	0.10255	0.0995028	0.0987528	0.0995752	0.0994325	0.0998972	0.0995158	0.100556	0.100038	0.100844	0.099664	0.0994464	0.0995958	0.0999319	0.0992597
YJL154C	0.0944813	0.0958142	0.093184	0.09461	0.0963391	0.0953984	0.0950054	0.0953984	0.0985648	0.0942631	0.093759	0.0949113	0.0949281	0.09532	0.0946894	0.0964566	0.0963891	0.0948015	0.0944626	0.0946342	0.0944759	0.0943402	0.0945121
YJL155C	0.0728376	0.0756811	0.0728254	0.0740518	0.0759763	0.0743558	0.0739046	0.0733159	0.0769476	0.0739138	0.0746445	0.074227	0.0736593	0.0740109	0.0733612	0.0755234	0.0762906	0.0736556	0.074255	0.0740518	0.0747876	0.0740518	0.0748253
YJL156C	0.094099	0.093304	0.0937662	0.0941813	0.0943013	0.0938961	0.0922733	0.0945455	0.0934241	0.0941734	0.0942314	0.0945681	0.0940375	0.0943867	0.0936652	0.0950216	0.094201	0.0945455	0.0947178	0.0945984	0.0945455	0.0954978	0.0950827
[truncated: 1,762 more rows]

## Sheet: Dubin_S1B
TABLE S1B: Each row reports the value for one gene of DXY, a metric of sequence divergence, between the S. cerevisiae European vineyard population and the North American S. paradoxus subpopulation in the column header. ‘NaN’ indicates an undefined DXY value.
[truncated: 4,389 more rows]
